# Supplementary material for: The cell senescence regulator p16 is a promising cancer prognostic and immune check-point inhibitor (ICI) therapy biomarker
Source: publisher site journal article supplement (doi:10.18632/aging.204601), 2023-03-23
Supplement: Supplementary file [file aging-v15i6-204601-supplementary-material-SD1.pdf]

**SUPPLEMENTARY FIGURES**

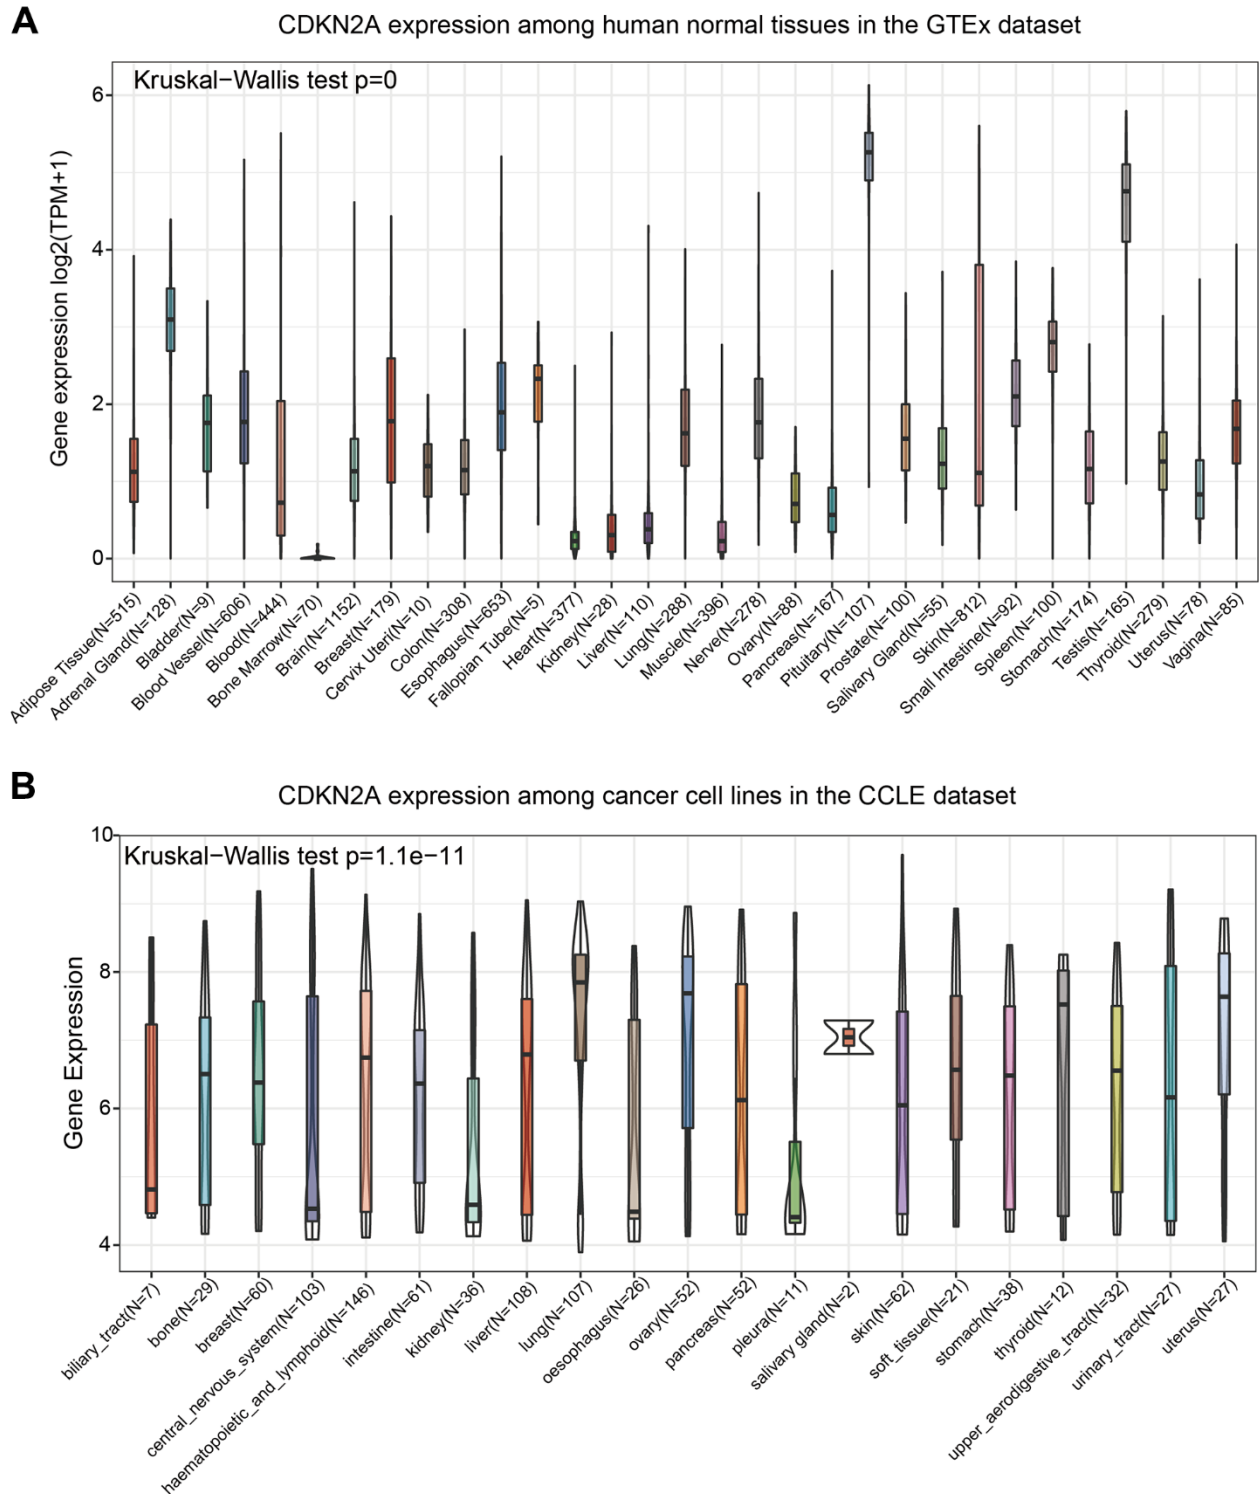

**Supplementary Figure 1. Basic expression levels of CDKN2A across human normal tissues and cancer cells. (A)** CDKN2A expression among human normal tissues in the GTEx dataset. **(B)** CDKN2A expression among cancer cell lines in the CCLE dataset.

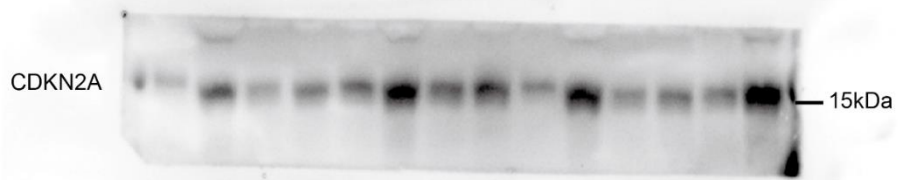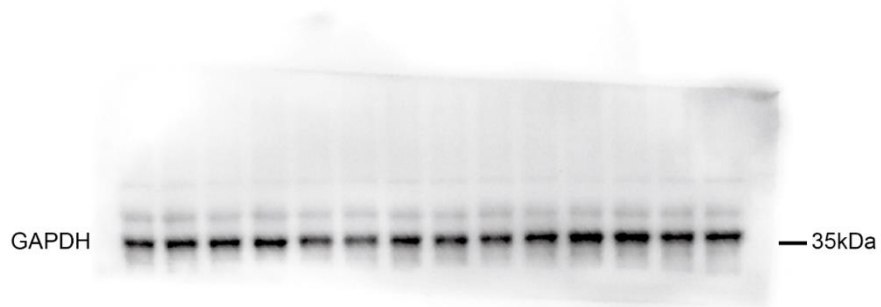

**Supplementary Figure 2. Original Western blot bands of CDKN2A and GAPDH in 7 pairs of LGG samples.**

**Original images of PC-3 cells downloading from the HPA datasets**

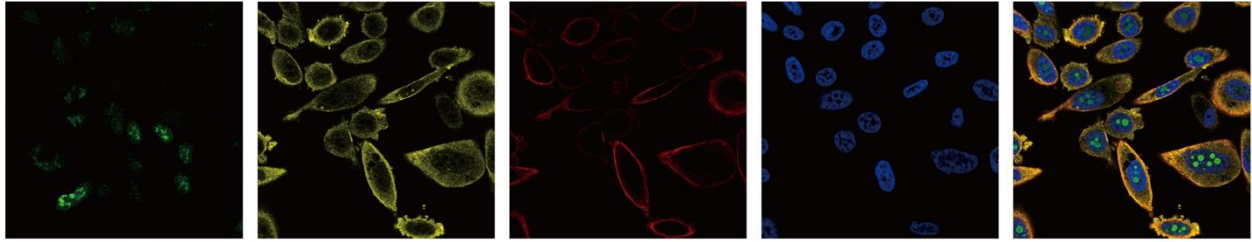

**Original images of HEK-293 cells downloading from the HPA datasets**

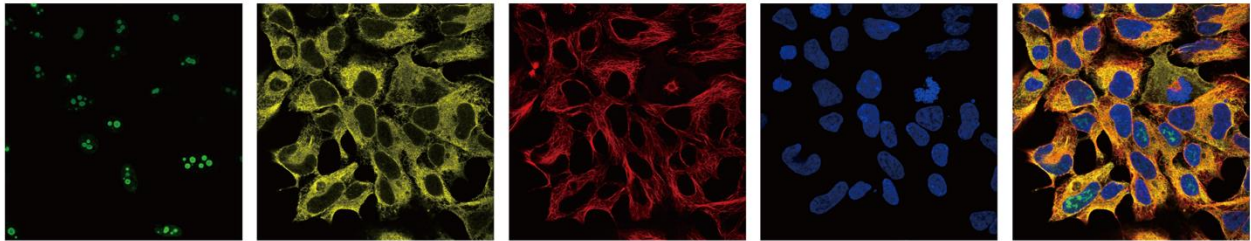

**Supplementary Figure 3. Original images of immunofluorescent staining of CDKN2A in PC-3 and HEK-293 cells downloaded from the HPA dataset.**



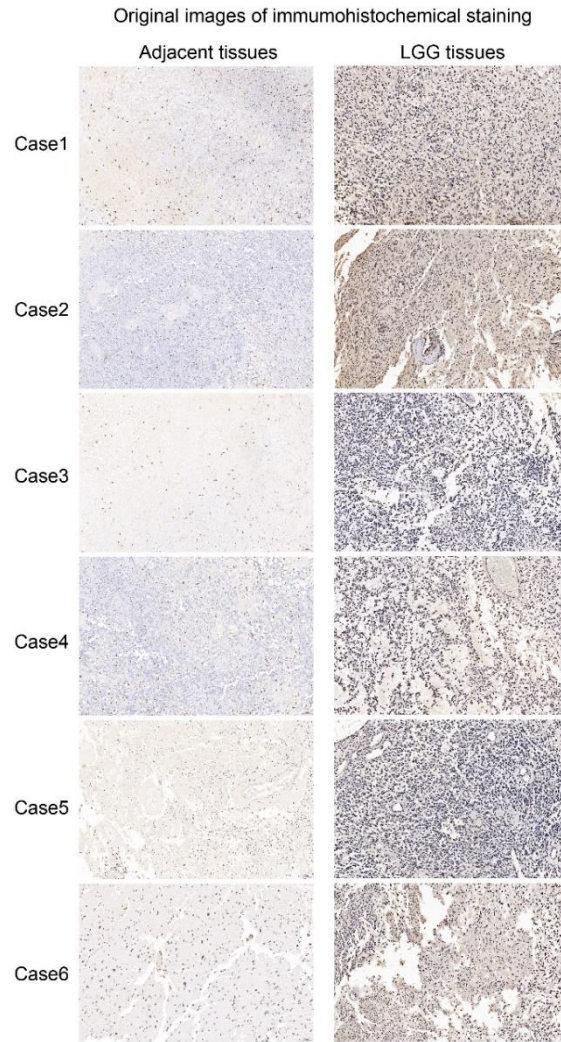

Supplementary Figure 5. Original images of immunohistochemical staining of CDKN2A in clinical LGG samples.

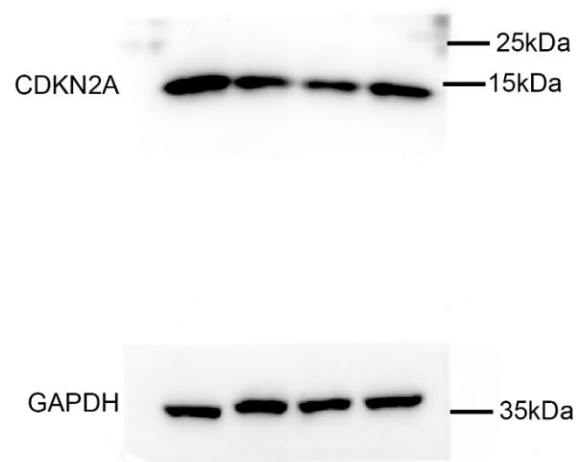

Supplementary Figure 6. Original Western blot bands of CDKN2A and GAPDH in si-CDKN2A transfected SW1088 cells.
