# Supplementary material for: The cell senescence regulator p16 is a promising cancer prognostic and immune check-point inhibitor (ICI) therapy biomarker
Source: Aging (Albany NY). 2023 Mar 23;15(6):2136–57. doi: 10.18632/aging.204601 (PMC10085592; doi:10.18632/aging.204601)
Supplement: Supplementary Table 2 [file aging-15-204601-s003.xlsx]

## Sheet: ACC
Table2. Differential expression genes related CDKN2A in TCGA-ACC
id	fc	log2fc	pvalue	padj
CDKN2A	13.4472	3.74923	1.74165e-14	3.57074e-10
FADS6	0.0314137	-4.99246	9.98124e-08	0.00102318
HUS1B	2.30848	1.20694	4.55394e-07	0.00291913
SHOX2	11.2749	3.49505	5.6953e-07	0.00291913
GPAM	0.341023	-1.55206	1.51779e-06	0.00505332
ZNF642	3.99215	1.99716	1.6012e-06	0.00505332
HIBADH	0.56813	-0.815706	1.72536e-06	0.00505332
C18orf54	3.00643	1.58805	1.99142e-06	0.00510351
GBAS	0.598903	-0.739605	3.50883e-06	0.00759002
PHF14	0.679984	-0.556428	4.03543e-06	0.00759002
TUBB	2.02098	1.01506	4.0723e-06	0.00759002
MYLK2	3.33178	1.73629	4.72024e-06	0.00806453
TMEM106B	0.512141	-0.965388	5.21824e-06	0.00822957
EME1	3.41448	1.77167	5.89561e-06	0.00847209
C11orf84	1.88443	0.914128	6.19848e-06	0.00847209
C16orf74	3.89904	1.96312	6.7027e-06	0.00858867
PHF19	2.18135	1.12522	7.54835e-06	0.00874168
PTK7	7.85672	2.97393	8.84619e-06	0.00874168
RCC2	1.81685	0.861439	9.03804e-06	0.00874168
CENPW	3.07237	1.61935	9.27043e-06	0.00874168
CROT	0.51834	-0.948028	9.32687e-06	0.00874168
LEPRE1	1.89979	0.925842	9.3804e-06	0.00874168
GJC1	3.01356	1.59147	9.98323e-06	0.00886849
JAZF1	0.456483	-1.13137	1.07013e-05	0.00886849
RECQL4	3.83008	1.93737	1.08142e-05	0.00886849
TCF19	2.59605	1.37632	1.14418e-05	0.00902226
SYCE2	4.12468	2.04428	1.21006e-05	0.00918839
PEX1	0.447363	-1.16048	1.25683e-05	0.00920266
OSTF1	1.70075	0.766168	1.44929e-05	0.00984513
RNASEH2A	2.02621	1.01878	1.46707e-05	0.00984513
STMN1	2.85158	1.51176	1.5248e-05	0.00984513
CASC4	0.550008	-0.862475	1.53971e-05	0.00984513
SIX2	5.76994	2.52856	1.60275e-05	0.00984513
DUSP2	4.00054	2.0002	1.63836e-05	0.00984513
DDAH2	2.67422	1.41912	1.724e-05	0.00984513
SPG11	0.620093	-0.689444	1.75628e-05	0.00984513
ANKRD13D	1.86441	0.898722	1.77675e-05	0.00984513
WDR61	0.64805	-0.625822	1.90073e-05	0.0101267
LASS5	1.52496	0.60877	1.92635e-05	0.0101267
ZBTB17	1.41436	0.500145	2.03088e-05	0.0104093
USP8	0.643004	-0.6371	2.12933e-05	0.0106477
CDKN2BAS	3.26666	1.70782	2.20937e-05	0.0107849
CYP4F12	0.14516	-2.78429	2.66543e-05	0.0127085
TK1	4.69906	2.23237	2.91708e-05	0.0133722
C6orf145	2.19312	1.13299	2.93507e-05	0.0133722
SOX11	5.08144	2.34524	3.01736e-05	0.0134482
DIS3L	0.616403	-0.698054	3.2881e-05	0.0140635
TRAF2	1.95162	0.964671	3.35738e-05	0.0140635
FANCC	2.09655	1.06802	3.45464e-05	0.0140635
HDHD2	0.658036	-0.603762	3.4599e-05	0.0140635
FANCG	2.07885	1.05578	3.5189e-05	0.0140635
ETFDH	0.479421	-1.06063	3.81615e-05	0.0140635
POLE2	3.86824	1.95168	3.82061e-05	0.0140635
MCM5	2.40191	1.26418	3.86487e-05	0.0140635
ZFP106	0.644734	-0.633225	3.88945e-05	0.0140635
PPIP5K1	0.494007	-1.0174	3.94558e-05	0.0140635
TAX1BP1	0.590416	-0.760197	3.95796e-05	0.0140635
MBOAT4	0.430621	-1.21551	3.97855e-05	0.0140635
MYBL2	6.30146	2.65569	4.11815e-05	0.0140837
C1QL1	5.19492	2.3771	4.12165e-05	0.0140837
TBC1D4	0.455973	-1.13298	4.25299e-05	0.0140863
VAX2	5.61227	2.48859	4.32966e-05	0.0140863
GNB4	2.53443	1.34166	4.37005e-05	0.0140863
IVD	0.546085	-0.872802	4.39725e-05	0.0140863
RAD54L	4.70895	2.23541	4.66095e-05	0.0147013
UQCRC2	0.579372	-0.787439	4.77407e-05	0.0147958
AMIGO2	0.335309	-1.57644	4.83523e-05	0.0147958
SUMO2	1.45613	0.542139	4.93584e-05	0.0148816
C9orf69	1.60138	0.679318	5.09976e-05	0.0148972
CILP2	11.1707	3.48165	5.12605e-05	0.0148972
MBOAT2	3.01018	1.58985	5.19672e-05	0.0148972
NKIRAS2	1.59182	0.670673	5.23167e-05	0.0148972
TAS2R20	1.946	0.960509	5.33098e-05	0.014972
ARHGDIA	1.49194	0.577186	5.40926e-05	0.0149866
TRAIP	2.09852	1.06937	5.57895e-05	0.0152013
CLPX	0.562413	-0.830298	5.63507e-05	0.0152013
SIX1	4.51363	2.17429	5.8027e-05	0.0152809
DEM1	1.61117	0.688105	5.81362e-05	0.0152809
DLX1	5.85215	2.54897	5.96957e-05	0.0154922
UHRF1	4.68988	2.22955	6.05405e-05	0.015515
FAM89B	1.77202	0.825398	6.20544e-05	0.0157067
FAM24B	2.71482	1.44086	6.33328e-05	0.0158348
C14orf80	2.35807	1.23761	6.45853e-05	0.0159533
C17orf70	1.50102	0.585943	6.55175e-05	0.015991
RAD9A	1.7766	0.829117	6.81522e-05	0.0162952
ZNF695	3.55125	1.82833	6.83535e-05	0.0162952
LBH	3.05072	1.60915	7.00617e-05	0.0165104
CNPY3	1.89201	0.919916	7.2866e-05	0.0167313
PNPLA4	0.417814	-1.25907	7.33116e-05	0.0167313
GPR161	2.63008	1.39511	7.42331e-05	0.0167313
DPM2	1.66741	0.737611	7.46271e-05	0.0167313
FANCD2	2.457	1.2969	7.54889e-05	0.0167313
ATAD2	2.38456	1.25372	7.69311e-05	0.0167313
ZNF770	0.615715	-0.699665	7.70777e-05	0.0167313
C17orf53	2.74654	1.45762	7.75276e-05	0.0167313
SYCP2	3.58397	1.84156	7.92712e-05	0.0169294
CEP55	4.1823	2.0643	8.14479e-05	0.0172149
DENND4A	0.536268	-0.898974	8.38701e-05	0.017546
KIF15	3.72436	1.89699	8.58087e-05	0.017743
ESF1	0.655766	-0.608747	8.69684e-05	0.017743
PROC	2.18705	1.12899	8.88774e-05	0.017743
GIN1	0.622151	-0.684664	8.91512e-05	0.017743
LOC100130776	3.11721	1.64025	8.9292e-05	0.017743
DLD	0.53098	-0.91327	9.08523e-05	0.017743
HRAS	1.79496	0.843956	9.08701e-05	0.017743
PPP1R14B	2.03831	1.02737	9.19317e-05	0.0177692
LOC84989	3.15244	1.65647	9.35753e-05	0.0177692
PRIM2	1.83658	0.87702	9.38213e-05	0.0177692
KIAA1841	2.24303	1.16545	9.44709e-05	0.0177692
LOC84856	6.90131	2.78687	9.56019e-05	0.0178185
ANKRD29	0.347488	-1.52497	9.77316e-05	0.0179227
KLHL7	0.657211	-0.605572	9.79095e-05	0.0179227
B4GALT2	1.88835	0.917126	9.99274e-05	0.018026
TCF3	1.84228	0.881495	0.000100232	0.018026
FOXD3	5.98441	2.58121	0.000104412	0.0184282
EVL	1.96251	0.972702	0.000105149	0.0184282
H2AFX	2.215	1.14731	0.000105667	0.0184282
CCDC132	0.60304	-0.729675	0.000108228	0.0184282
PHF13	1.62417	0.699705	0.000108363	0.0184282
GSC	4.00306	2.0011	0.000109302	0.0184282
PTTG1	4.44697	2.15282	0.000109692	0.0184282
RFXANK	1.517	0.60122	0.000110879	0.0184282
PHYH	0.548696	-0.86592	0.000111358	0.0184282
RAB9A	0.552542	-0.855845	0.000111457	0.0184282
TACC3	2.67908	1.42174	0.000116678	0.019137
GPR137C	2.48753	1.31472	0.000119796	0.0194296
CCDC155	2.60072	1.37891	0.000120357	0.0194296
WDR62	3.29632	1.72086	0.000122154	0.0195656
HES4	3.08664	1.62604	0.000124227	0.0196033
PIP5KL1	2.69926	1.43256	0.000126602	0.0196033
MLF1IP	2.794	1.48233	0.000128459	0.0196033
NUF2	4.01325	2.00477	0.000129474	0.0196033
C5orf35	0.57382	-0.80133	0.000130052	0.0196033
C1orf144	1.43099	0.517018	0.000130464	0.0196033
CHAF1B	2.28228	1.19048	0.000131165	0.0196033
ADRBK1	1.54483	0.627447	0.000133128	0.0196033
CYP2E1	4.40578	2.1394	0.000133766	0.0196033
PDCL	1.41983	0.505722	0.000133993	0.0196033
CDCA5	3.35704	1.74719	0.000134133	0.0196033
LHX2	5.81872	2.5407	0.000134896	0.0196033
CDCA8	3.46572	1.79315	0.000136303	0.0196033
HOXC11	7.05673	2.819	0.000136338	0.0196033
PAK1	1.93683	0.953697	0.000136731	0.0196033
CYP4B1	0.237415	-2.07452	0.000139585	0.0198283
RPS6KA4	1.48349	0.568996	0.000140973	0.0198283
EYA2	4.95268	2.30821	0.000141203	0.0198283
JAG2	2.2418	1.16466	0.000143762	0.0198588
ACOT6	0.453216	-1.14173	0.000144243	0.0198588
LYPD5	4.05216	2.01869	0.000144463	0.0198588
SIPA1	1.87674	0.908229	0.000145475	0.0198588
ZWINT	2.98945	1.57988	0.000147793	0.0198588
PLDN	0.683796	-0.548362	0.000149001	0.0198588
HYAL1	0.234443	-2.09269	0.000149253	0.0198588
MKLN1	0.661262	-0.596707	0.000149324	0.0198588
TFB2M	0.533033	-0.907702	0.000150138	0.0198588
TUBGCP5	0.599809	-0.737425	0.000153041	0.0201131
FANCA	3.00436	1.58706	0.000154945	0.020122
KIFC1	3.90175	1.96412	0.000155071	0.020122
CDCA4	2.09283	1.06546	0.000156076	0.020125
ASF1B	2.79219	1.4814	0.000161399	0.020563
EPS8L1	4.27397	2.09558	0.000162121	0.020563
NCAPH	3.30849	1.72617	0.000162482	0.020563
MFSD10	1.68223	0.750375	0.000165872	0.0207677
PDSS2	0.544231	-0.87771	0.000166399	0.0207677
KIF2C	4.22822	2.08005	0.000167138	0.0207677
LACTB	0.534797	-0.902937	0.000175429	0.0215824
CYP11B2	0.0732864	-3.77031	0.000176213	0.0215824
DSCR3	0.651311	-0.61858	0.000176853	0.0215824
RAD51AP1	3.05558	1.61145	0.000179815	0.0217879
C19orf47	1.60535	0.682885	0.000180662	0.0217879
EIF4EBP1	2.28831	1.19428	0.000184832	0.0219416
PSRC1	2.70597	1.43615	0.000185593	0.0219416
CDC20	5.24892	2.39202	0.000186257	0.0219416
TMEM192	0.561135	-0.83358	0.000187231	0.0219416
ADAL	0.651636	-0.617861	0.000187583	0.0219416
SLC25A13	0.593437	-0.752832	0.000188358	0.0219416
BASP1	5.03653	2.33243	0.000192593	0.0222165
GINS2	2.85319	1.51258	0.000192886	0.0222165
UBE2C	5.17886	2.37264	0.000197076	0.0225724
DTL	3.76867	1.91406	0.000200371	0.0228223
HTRA2	1.55404	0.636021	0.000203373	0.0230362
SPAG5	2.68104	1.42279	0.000204776	0.0230586
AKAP9	0.576415	-0.794819	0.000205821	0.0230586
NCAPG	4.04398	2.01577	0.000207656	0.0231378
HAPLN1	6.69361	2.74278	0.00021254	0.0235541
SNX13	0.661095	-0.59707	0.000219861	0.0242344
CDCA2	3.90093	1.96382	0.000224533	0.0243257
C14orf93	1.41105	0.496774	0.000224621	0.0243257
STK38	1.55389	0.635888	0.000225318	0.0243257
MMP14	3.00502	1.58738	0.000226103	0.0243257
BIRC5	4.95665	2.30936	0.000226622	0.0243257
NASP	1.83824	0.878324	0.000227962	0.0243421
TUBA1B	1.64644	0.71935	0.000231044	0.0244716
CHTF18	2.19518	1.13434	0.000231563	0.0244716
RCE1	1.73012	0.790876	0.000238241	0.0250483
CDK2	1.87891	0.909896	0.000240114	0.0250716
C16orf59	2.64459	1.40304	0.00024189	0.0250716
C5orf4	0.424158	-1.23733	0.000242131	0.0250716
LOC282997	2.36079	1.23927	0.000244662	0.0251928
BET1	0.611954	-0.708504	0.000246343	0.0251928
CLSTN1	1.75082	0.80803	0.000249272	0.0251928
KIAA0141	0.696026	-0.522787	0.000249983	0.0251928
CNIH2	3.19885	1.67755	0.000251785	0.0251928
TMLHE	0.620194	-0.689209	0.000251935	0.0251928
CCDC18	2.45597	1.29629	0.000252444	0.0251928
CBX2	2.97207	1.57147	0.000253132	0.0251928
NRGN	2.80973	1.49043	0.000255066	0.0252626
C1QL4	7.66193	2.93771	0.000257474	0.0253786
OSBPL1A	0.607529	-0.718974	0.000263133	0.0258122
UBE2S	2.34343	1.22862	0.000266073	0.0258566
TRERF1	1.80941	0.85552	0.000266108	0.0258566
ETFA	0.620136	-0.689343	0.000267582	0.0258772
NRBP1	1.43847	0.524532	0.000269597	0.0259496
MAOB	0.12713	-2.97563	0.000272017	0.0259717
TBX2	2.93562	1.55366	0.000272359	0.0259717
IDH3A	0.555422	-0.848343	0.000275384	0.0261385
MXD3	1.96733	0.976237	0.000282253	0.0264934
PCDHGA9	0.249714	-2.00165	0.000282774	0.0264934
CCNE2	3.34204	1.74073	0.000285092	0.0264934
C5orf34	2.44757	1.29135	0.000286707	0.0264934
PTMA	1.76822	0.8223	0.000287236	0.0264934
POLD1	1.94275	0.958102	0.000288508	0.0264934
TROAP	4.91419	2.29695	0.000288743	0.0264934
LOC158572	0.4607	-1.1181	0.000289461	0.0264934
MOSPD1	0.51177	-0.966432	0.000299134	0.0272571
TBC1D8B	0.415888	-1.26573	0.000301524	0.0272922
C9orf114	1.46403	0.549947	0.000302181	0.0272922
ISL2	3.52433	1.81735	0.000305311	0.0274539
POLR3E	0.676035	-0.564829	0.000309334	0.0276078
GNL1	1.39621	0.48152	0.000309716	0.0276078
SDHA	0.556161	-0.846425	0.000311294	0.0276284
HOXC10	7.90415	2.98261	0.000312746	0.0276376
NUDT12	0.462009	-1.11401	0.000316835	0.0278114
HAGH	0.541169	-0.885849	0.00031799	0.0278114
C15orf42	3.36455	1.75041	0.000318782	0.0278114
GSDMB	3.56453	1.83371	0.000323864	0.028135
RHBDL2	2.8673	1.51969	0.000326906	0.0282795
CBX7	0.44907	-1.15499	0.000336593	0.028851
VIM	2.25201	1.17121	0.000339362	0.028851
XRCC3	1.69283	0.759439	0.000340137	0.028851
DHX29	0.671046	-0.575516	0.000340189	0.028851
TNFRSF4	2.37441	1.24757	0.000340549	0.028851
SEC14L5	0.303953	-1.71808	0.000344983	0.0288716
USP16	0.634471	-0.656374	0.000345306	0.0288716
C2orf77	2.1145	1.08032	0.000345782	0.0288716
HELLS	3.14884	1.65482	0.000346696	0.0288716
C15orf33	0.42298	-1.24134	0.00034849	0.0288716
DRP2	2.92283	1.54737	0.000350335	0.0288716
HMGB2	2.19984	1.1374	0.00035065	0.0288716
ZMYND19	1.72096	0.783214	0.000354479	0.029036
PLXNA1	1.98312	0.987775	0.000356307	0.029036
IQCA1	4.79071	2.26024	0.000356895	0.029036
CCHCR1	1.76152	0.81682	0.000361575	0.0293005
SGOL1	3.48615	1.80163	0.000368112	0.0297095
PRPF38A	1.55676	0.638544	0.000370308	0.0297095
TMEM44	2.18792	1.12956	0.000371248	0.0297095
MCM10	3.62244	1.85696	0.00037242	0.0297095
C11orf82	2.4856	1.31359	0.000378728	0.0299853
C21orf34	0.287648	-1.79763	0.000380093	0.0299853
NUPL2	0.719169	-0.475597	0.000380265	0.0299853
NDUFAF1	0.587398	-0.767591	0.000383536	0.0301065
KIF18A	3.31833	1.73046	0.000384738	0.0301065
RABL3	0.626702	-0.674149	0.000386693	0.0301444
HOTAIR	4.00721	2.0026	0.000392579	0.0304874
CMTM3	2.24141	1.16441	0.000399356	0.0308966
ZNF513	1.60094	0.678921	0.000401454	0.0309421
MCM2	2.2908	1.19585	0.000408243	0.0311634
MCM3	1.63965	0.713387	0.000408326	0.0311634
CTHRC1	4.36376	2.12557	0.000409575	0.0311634
ACADSB	0.497089	-1.00842	0.000410404	0.0311634
DHX34	1.50013	0.585091	0.000413713	0.0312987
LOC441455	2.56762	1.36043	0.0004178	0.0313797
TEAD4	2.35337	1.23473	0.000417845	0.0313797
ACAT1	0.561042	-0.83382	0.000424168	0.0315343
C9orf109	3.95457	1.98352	0.000424356	0.0315343
OTUB1	1.53496	0.618203	0.000424517	0.0315343
ALDH1L1	0.111796	-3.16105	0.000427581	0.0315917
FOXM1	3.47557	1.79725	0.000428496	0.0315917
C17orf62	1.52919	0.612768	0.000430346	0.0315917
PAQR6	2.88317	1.52765	0.000431455	0.0315917
MBNL3	0.395823	-1.33707	0.000438384	0.0319849
ESRP1	3.33807	1.73902	0.000440553	0.0320291
PKMYT1	4.84041	2.27513	0.000445234	0.0321266
SAP30BP	1.38074	0.465439	0.000445528	0.0321266
FAM132A	2.36892	1.24423	0.000446594	0.0321266
PARP16	0.611913	-0.708602	0.000450614	0.0323024
TTC19	0.702978	-0.50845	0.000463937	0.0329441
IMMP2L	0.522484	-0.936541	0.000465091	0.0329441
PLAC2	3.36567	1.75089	0.000465633	0.0329441
TRIM59	2.0788	1.05575	0.00046739	0.0329441
NDUFS2	0.640355	-0.643057	0.000470191	0.0329441
STIL	2.45916	1.29817	0.000470812	0.0329441
OSBPL7	2.09578	1.06749	0.00047296	0.0329441
PRCC	1.47934	0.564958	0.000472978	0.0329441
LMNB2	1.872	0.904577	0.000474027	0.0329441
NUDT1	1.93844	0.954893	0.000480087	0.0332402
PPM1G	1.47246	0.558227	0.000482852	0.0332402
C9orf53	1.6812	0.749487	0.000483393	0.0332402
NKX6-1	4.35073	2.12126	0.000486086	0.0332402
GLI2	3.05666	1.61195	0.000487807	0.0332402
POLQ	3.20313	1.67948	0.000489508	0.0332402
RGN	0.245619	-2.02551	0.000489637	0.0332402
C1orf25	0.733221	-0.447679	0.000492792	0.033344
FAM100B	1.61113	0.688076	0.000498446	0.0333739
BCL2L12	1.87809	0.909269	0.000499304	0.0333739
HUS1	0.691878	-0.53141	0.000499897	0.0333739
ACRV1	1.98557	0.989552	0.000501508	0.0333739
LOC145474	1.58366	0.663258	0.000502422	0.0333739
C1orf135	2.12482	1.08734	0.000503287	0.0333739
MEA1	1.59873	0.676925	0.000505052	0.0333739
SMC1B	4.00318	2.00115	0.000506256	0.0333739
RALY	1.54045	0.623355	0.000508824	0.0334356
INO80B	1.63146	0.706161	0.000511846	0.0334873
RAET1K	2.43313	1.28281	0.000512878	0.0334873
S1PR2	1.83942	0.879249	0.000519365	0.0338033
ATAD5	1.9655	0.974895	0.000524428	0.0339077
RAD50	0.587268	-0.76791	0.000526466	0.0339077
TFAP2E	2.51531	1.33073	0.000527365	0.0339077
HMGN2	1.63596	0.710135	0.000531224	0.0339077
PSMC3IP	2.42661	1.27894	0.000532271	0.0339077
MAN2A2	0.5575	-0.842957	0.000534875	0.0339077
ZNF362	1.55569	0.637557	0.000535478	0.0339077
SLC48A1	0.456775	-1.13044	0.00053555	0.0339077
PNPLA8	0.584177	-0.775522	0.000536669	0.0339077
CD151	1.8626	0.897318	0.000537509	0.0339077
PAFAH1B3	1.98428	0.988613	0.000540417	0.0339371
AKTIP	0.644563	-0.633606	0.000541285	0.0339371
REPIN1	0.653085	-0.614656	0.000551058	0.0344445
SCGN	0.196582	-2.3468	0.000555536	0.0346188
HJURP	4.42267	2.14492	0.000557329	0.0346253
MIER2	1.55246	0.634557	0.000563127	0.0348799
MOB2	1.48995	0.57526	0.000580734	0.0358621
C19orf26	3.0559	1.6116	0.000586394	0.0361029
CLN3	0.632978	-0.659772	0.000597523	0.0366779
ASPM	4.18067	2.06373	0.000600899	0.036775
POU4F1	5.4575	2.44824	0.000605533	0.0369074
VPS39	0.716776	-0.480405	0.000608365	0.0369074
SLFN13	3.39643	1.76402	0.000609983	0.0369074
MEIS3	4.5495	2.18571	0.000612516	0.0369074
SEC24B	0.693534	-0.52796	0.000613003	0.0369074
PMPCB	0.714147	-0.485707	0.000613862	0.0369074
TMIE	0.28127	-1.82997	0.000618232	0.0369875
GPR37L1	0.200522	-2.31817	0.000618804	0.0369875
E2F2	3.20281	1.67934	0.000625757	0.0372944
PCDHB2	3.53744	1.8227	0.000631058	0.0373176
ST13	0.66624	-0.585887	0.000631753	0.0373176
NFKBIL2	2.44309	1.28871	0.000632659	0.0373176
HARS2	0.742092	-0.43033	0.000633428	0.0373176
C7orf64	0.707438	-0.499325	0.000636685	0.037402
ANO8	0.435585	-1.19897	0.000647249	0.0378333
CTSL2	4.07503	2.02681	0.000647716	0.0378333
DEPDC1	4.01119	2.00403	0.000650078	0.0378634
CSRP2BP	0.60724	-0.719661	0.000655894	0.0380939
FAM198B	0.416252	-1.26447	0.00065965	0.0381634
CBFB	1.54523	0.627824	0.000660904	0.0381634
PGF	2.75753	1.46337	0.000662676	0.0381634
C19orf43	1.47048	0.556287	0.000667272	0.0382161
LOC339674	2.01911	1.01372	0.000667319	0.0382161
DDX39	1.72773	0.788881	0.000669876	0.0382557
FOXD1	5.25683	2.39419	0.000675018	0.0384259
BLM	2.85137	1.51166	0.000676604	0.0384259
TRIP13	3.22306	1.68843	0.000685167	0.0387243
ZBTB8A	1.60521	0.68276	0.000685636	0.0387243
HSPA9	0.605602	-0.723557	0.000695462	0.0391713
GHITM	0.662466	-0.594081	0.000700367	0.0393395
GGT6	0.137353	-2.86404	0.000706368	0.0395682
CAMTA1	1.4569	0.542899	0.000713434	0.0397755
C7orf51	0.395985	-1.33648	0.00071395	0.0397755
CENPM	3.3328	1.73674	0.000734809	0.0408267
TRNAU1AP	1.47085	0.556655	0.000746274	0.0412438
SLC27A3	2.03414	1.02442	0.00074634	0.0412438
WBP4	0.626519	-0.674569	0.000754428	0.0412699
TPX2	2.78622	1.47831	0.00075964	0.0412699
ADAM12	4.0794	2.02836	0.000759933	0.0412699
F10	0.122338	-3.03105	0.000760859	0.0412699
CFL1	1.47599	0.561684	0.000761722	0.0412699
FBXO42	1.35825	0.441751	0.000762226	0.0412699
DDX12	1.91085	0.934211	0.000762975	0.0412699
PLOD1	1.76155	0.816849	0.000764747	0.0412699
VEGFB	1.61468	0.691246	0.000764929	0.0412699
FAM19A3	2.08455	1.05974	0.000772886	0.0415061
ZNF579	1.60362	0.681328	0.000773391	0.0415061
PPP1CA	1.52979	0.613337	0.000775379	0.0415061
GPR160	2.00763	1.00549	0.000781668	0.0416822
SNRPA	1.50979	0.594349	0.000782735	0.0416822
ZCCHC17	1.42836	0.514361	0.000791616	0.0418575
C7orf58	0.29866	-1.74342	0.000791645	0.0418575
PTER	0.287656	-1.79759	0.000792474	0.0418575
HSPA4L	0.520125	-0.943069	0.000796019	0.0418575
LSM7	1.63483	0.709138	0.000798432	0.0418575
ZC3H6	0.63563	-0.653742	0.000799348	0.0418575
GPD1	0.225214	-2.15063	0.000800319	0.0418575
POC1A	1.93511	0.952416	0.000802368	0.0418579
CHFR	1.43561	0.521665	0.000816398	0.042466
CDT1	3.66093	1.87221	0.000819097	0.042466
TUBB2C	1.85767	0.893491	0.000820239	0.042466
TMEM155	2.09309	1.06563	0.000827349	0.0426819
CHEK1	1.82379	0.866938	0.000828572	0.0426819
CENPF	3.13461	1.64828	0.000838668	0.0430937
DNAJC8	1.33116	0.412683	0.000853048	0.0436733
MCM6	1.89242	0.92023	0.000854861	0.0436733
ZDHHC16	1.55491	0.636827	0.00085634	0.0436733
MAZ	1.56746	0.648429	0.000861464	0.0438256
TMEM54	2.76568	1.46763	0.000874739	0.0443909
SMC4	2.04504	1.03213	0.000885111	0.0445051
POLA2	1.54697	0.629449	0.000886468	0.0445051
PGM2L1	2.26106	1.177	0.000886642	0.0445051
SLC9A5	2.69013	1.42768	0.000887117	0.0445051
AURKAPS1	2.08898	1.0628	0.000888455	0.0445051
SLC24A1	0.64645	-0.62939	0.000890015	0.0445051
APOBEC3C	0.54114	-0.885927	0.000895762	0.0446835
TMSB10	2.24432	1.16628	0.000905346	0.0450519
HN1	1.97063	0.97866	0.000914368	0.0453908
C3	0.141949	-2.81656	0.000918826	0.0455018
GATAD1	0.687414	-0.54075	0.000926096	0.045697
PASK	2.01585	1.01139	0.000927878	0.045697
PRKD2	1.34958	0.432506	0.000933851	0.045697
WTIP	2.32493	1.21719	0.000937419	0.045697
SLC10A4	2.92718	1.54951	0.000937705	0.045697
KIF18B	4.11873	2.0422	0.000938059	0.045697
RACGAP1	2.3216	1.21512	0.000939178	0.045697
EFHD2	1.68104	0.749351	0.000940597	0.045697
NDC80	3.53595	1.8221	0.000950685	0.0459504
KIAA1737	0.57913	-0.78804	0.000951553	0.0459504
RAB1B	1.30564	0.384762	0.000952866	0.0459504
SLC29A1	0.36013	-1.47341	0.000956472	0.0459504
FUT3	2.31239	1.20939	0.000957272	0.0459504
MOV10	1.51357	0.597951	0.00095926	0.0459504
DEGS1	1.43157	0.5176	0.000973256	0.0465121
EPHA3	4.46868	2.15985	0.000977756	0.0466185
ATP6V1B1	3.90839	1.96658	0.000980858	0.0466579
CNKSR3	0.374237	-1.41798	0.000991055	0.0469811
NRIP3	3.00045	1.58518	0.000992236	0.0469811
STRN4	1.40926	0.494939	0.00100591	0.0475187
BHLHB9	0.60294	-0.729914	0.00101669	0.0479176
CAPZB	1.3564	0.439787	0.00102222	0.0480183
LMNB1	2.68558	1.42523	0.00102351	0.0480183
SAMD5	2.77102	1.47042	0.00102648	0.0480478
ESPL1	2.91827	1.54512	0.00103506	0.0482816
EPN1	1.2814	0.357717	0.00103816	0.0482816
SKA3	3.17096	1.66492	0.00103854	0.0482816
LYPD1	3.53539	1.82187	0.00105424	0.0488943
PTBP1	1.28033	0.356519	0.00105649	0.0488943
RTKN2	3.37554	1.75512	0.00106506	0.0491801
SPC24	3.21663	1.68555	0.00107289	0.0493554
SPIRE1	0.658164	-0.603482	0.00107368	0.0493554
GCC1	0.581436	-0.782308	0.0010805	0.0495579
USO1	0.679858	-0.556695	0.00109226	0.0498331
RPL12	1.64597	0.718938	0.00109334	0.0498331
CAMK2N2	2.61524	1.38694	0.00109706	0.0498331
ORC1L	2.85762	1.51482	0.0011029	0.0498331
FAM57A	2.23964	1.16327	0.00110661	0.0498331
KIF11	2.47501	1.30743	0.00110671	0.0498331
P2RY2	0.172108	-2.53862	0.00110797	0.0498331
AIP	1.41788	0.503739	0.00110837	0.0498331
COL24A1	3.81563	1.93192	0.00111053	0.0498331
USP51	0.420958	-1.24825	0.00111081	0.0498331
LAMA1	4.95991	2.31031	0.00111535	0.0499278
DONSON	1.81223	0.857764	0.00111895	0.0499632
MUTYH	1.67987	0.748347	0.00112102	0.0499632
DCAF15	1.48459	0.570066	0.0011268	0.0501122
CCDC126	0.577384	-0.792396	0.00112995	0.0501433
TOP2A	3.42379	1.77559	0.00113326	0.0501814
COL4A2	2.22711	1.15517	0.00114022	0.0503812
LIME1	2.31916	1.2136	0.00114886	0.0506114
FMO2	0.182394	-2.45487	0.00115037	0.0506114
KCNJ6	3.9385	1.97764	0.00115864	0.0508662
DVL3	1.41329	0.499059	0.00116356	0.0509181
AMIGO1	0.425532	-1.23266	0.00116479	0.0509181
NIPAL2	0.430009	-1.21756	0.00117063	0.0509849
RORA	0.451196	-1.14817	0.0011713	0.0509849
PBX4	2.72741	1.44753	0.00117576	0.0510461
WDR7	0.674719	-0.56764	0.00118155	0.0510461
H2AFY2	3.01511	1.59221	0.0011826	0.0510461
PACS1	1.55999	0.641536	0.00118324	0.0510461
C11orf10	1.35467	0.437938	0.00118862	0.0510461
SLTM	0.747223	-0.420389	0.00118894	0.0510461
SAT2	0.568849	-0.813882	0.00119013	0.0510461
SATL1	0.615146	-0.701	0.00119342	0.0510805
CDC25A	2.68376	1.42426	0.00120154	0.051321
ADAT3	1.93002	0.948613	0.00120713	0.0514524
C7orf10	0.371155	-1.42991	0.00122078	0.051835
POLR1E	1.6861	0.753694	0.00122351	0.051835
RAD51	3.12468	1.64371	0.00122662	0.051835
HSF1	1.45041	0.53646	0.00122787	0.051835
MCCC2	0.579526	-0.787054	0.00123184	0.051835
DNAJB11	1.38715	0.47212	0.00123325	0.051835
EXO1	3.84379	1.94253	0.00123602	0.051835
C11orf61	1.57197	0.652574	0.00123764	0.051835
SPHK1	3.36842	1.75207	0.0012403	0.051835
COL7A1	4.49828	2.16937	0.00124163	0.051835
HN1L	1.59707	0.675429	0.00124392	0.051835
CDK1	3.51307	1.81273	0.00125619	0.0521358
NUDT3	1.52307	0.606982	0.00125625	0.0521358
TMEM183A	1.45216	0.538204	0.00126002	0.0521358
PCGF2	1.61059	0.68759	0.00126456	0.0521358
GINS4	2.22913	1.15648	0.00126475	0.0521358
B3GNT8	0.227259	-2.13759	0.00126639	0.0521358
KLHL1	2.40998	1.26902	0.00127962	0.0525645
FAM27C	2.77933	1.47474	0.00128332	0.0525645
FIS1	0.69752	-0.519694	0.00128897	0.0525645
FAM54A	2.29849	1.20069	0.00129443	0.0525645
HAPLN3	2.59421	1.37529	0.00129732	0.0525645
C3orf32	2.22883	1.15629	0.00130001	0.0525645
POPDC3	3.4806	1.79934	0.00130033	0.0525645
DBT	0.714594	-0.484804	0.00130175	0.0525645
FAM185A	0.702115	-0.510221	0.00130439	0.0525645
CENPK	2.86478	1.51843	0.00130745	0.0525645
TYW1	0.72064	-0.472649	0.001309	0.0525645
KRIT1	0.691132	-0.532966	0.00131072	0.0525645
CDC45	3.96297	1.98658	0.00131302	0.0525645
ABO	0.183037	-2.44979	0.00131546	0.0525645
COPS2	0.760349	-0.395266	0.0013193	0.0525645
SORBS3	1.89511	0.922285	0.00132004	0.0525645
ATRX	0.65942	-0.60073	0.00132128	0.0525645
ARHGAP33	2.1663	1.11523	0.00132612	0.0525645
ANGPT2	2.57041	1.362	0.00133028	0.0525645
NXN	2.75662	1.4629	0.00133209	0.0525645
EARS2	0.655657	-0.608987	0.00133267	0.0525645
ORC6L	2.18407	1.12702	0.00133474	0.0525645
TPPP3	2.29127	1.19615	0.00133691	0.0525645
C1QL3	0.333219	-1.58546	0.00133834	0.0525645
TRIM23	0.663481	-0.591873	0.00134128	0.0525793
IKBIP	1.74564	0.803756	0.00134533	0.0526372
AIFM1	0.599397	-0.738415	0.00134913	0.0526855
GEMIN8	0.650493	-0.620394	0.00136262	0.0531109
NDUFA5	0.640165	-0.643485	0.0013791	0.0535801
BUB1	3.20764	1.68151	0.00137988	0.0535801
MRPS27	0.749389	-0.416214	0.00138647	0.0536283
IRX1	1.57191	0.652521	0.00138731	0.0536283
RIT1	1.49299	0.578204	0.00138897	0.0536283
AKR1B1	0.335135	-1.57719	0.00140023	0.0539616
MMP9	4.73075	2.24207	0.00140383	0.0539988
DPF1	3.59319	1.84526	0.00141038	0.0541489
MFAP2	6.28901	2.65283	0.00141302	0.0541492
C9orf167	1.94766	0.961741	0.00142065	0.054244
AGGF1	0.720383	-0.473165	0.00142079	0.054244
NUDCD3	0.614432	-0.702674	0.00142469	0.0542918
RAD17	0.737212	-0.439849	0.00145409	0.0553058
SERPINH1	1.88659	0.915784	0.00145676	0.0553058
MAMLD1	0.353553	-1.5	0.00145949	0.0553058
ZNF300	2.81527	1.49327	0.00146209	0.0553058
TFAP2A	2.78595	1.47817	0.00146551	0.055333
PCSK7	1.53395	0.617249	0.00147211	0.0554413
NFASC	0.262801	-1.92796	0.00147378	0.0554413
MBLAC2	0.553324	-0.853805	0.0014793	0.0554854
HOXC9	3.0611	1.61405	0.00148141	0.0554854
PPP2R5D	1.26928	0.344014	0.00148308	0.0554854
KIF20B	1.91873	0.940149	0.00149714	0.0558215
GPRASP2	0.58032	-0.78508	0.00149998	0.0558215
DRD4	2.52751	1.33772	0.00150163	0.0558215
SUV39H1	1.48987	0.575188	0.00150295	0.0558215
CD99	1.79247	0.841947	0.00150837	0.0558297
KLHDC3	1.45288	0.538913	0.00150862	0.0558297
AGXT	0.154476	-2.69454	0.00151473	0.055955
PCCA	0.564243	-0.825611	0.00152342	0.0560694
TP53BP1	0.717201	-0.47955	0.00152775	0.0560694
AMIGO3	1.63419	0.708578	0.00153327	0.0560694
CSTF3	1.35459	0.43786	0.00153768	0.0560694
GBX2	2.05956	1.04234	0.00153899	0.0560694
TNNI3K	0.293555	-1.7683	0.00154019	0.0560694
PTCD2	0.658021	-0.603793	0.00154094	0.0560694
GINS1	2.18952	1.13062	0.00154388	0.0560694
CCR10	2.17724	1.1225	0.00154579	0.0560694
PTK6	2.44724	1.29116	0.00154739	0.0560694
ERCC6L	2.67676	1.42049	0.00155026	0.0560694
LYRM7	0.632019	-0.661961	0.00155065	0.0560694
NT5DC2	2.24211	1.16485	0.00155788	0.0562317
DSCC1	1.91342	0.936153	0.00156586	0.0563708
PLXNA2	2.097	1.06833	0.00157247	0.0563708
GALNTL4	1.88296	0.912999	0.00157368	0.0563708
COBLL1	0.356124	-1.48955	0.00157774	0.0563708
PPIH	1.47386	0.559603	0.00157779	0.0563708
MOAP1	0.569312	-0.812708	0.00157823	0.0563708
CCDC121	0.611151	-0.7104	0.00158541	0.0564785
HNRNPA1	1.4758	0.561495	0.00158675	0.0564785
CCDC137	1.50228	0.587156	0.00159438	0.0565775
IMPACT	0.680691	-0.554927	0.0015962	0.0565775
E2F1	1.9712	0.979075	0.00160125	0.0565775
FOXP3	1.88387	0.913699	0.0016023	0.0565775
CPNE5	2.21267	1.14579	0.00160519	0.0565775
LOC643387	1.36022	0.443845	0.00160609	0.0565775
SLC22A16	1.79656	0.845235	0.00161357	0.056637
C5orf53	0.60674	-0.720849	0.00161458	0.056637
PLEKHG2	2.04574	1.03262	0.00161607	0.056637
C12orf66	0.593472	-0.752749	0.0016214	0.0567269
CCT6B	0.521513	-0.939225	0.00162592	0.0567879
RPL35	1.65234	0.72451	0.00162944	0.0568143
GLTSCR1	1.50214	0.587017	0.00165296	0.0575364
DDX3X	0.710671	-0.492746	0.00166871	0.0579863
CERCAM	2.72846	1.44809	0.00167664	0.0580483
ITGA10	2.93355	1.55265	0.00167812	0.0580483
LAMA4	2.3103	1.20808	0.00168425	0.0580483
CENPN	1.85018	0.887668	0.00168492	0.0580483
LOC374443	2.06821	1.04838	0.00169208	0.0580483
MPP7	0.183258	-2.44805	0.00169214	0.0580483
NARG2	0.749788	-0.415446	0.00169314	0.0580483
KCNF1	2.48436	1.31288	0.00169431	0.0580483
LRRC56	1.97238	0.979939	0.00169598	0.0580483
TIGD5	1.58594	0.665339	0.00170174	0.0581483
DGKZ	1.42142	0.507329	0.00170653	0.0582151
AZI1	1.56166	0.643077	0.00171223	0.0582197
CALR	1.36134	0.445022	0.00171512	0.0582197
C4orf48	3.19763	1.677	0.00171518	0.0582197
ZC3H4	1.29556	0.373573	0.00172301	0.0583886
CXCR7	2.52528	1.33644	0.00172687	0.0584229
ANP32B	1.44848	0.534544	0.00173113	0.0584704
BARX1	4.96913	2.31299	0.00173777	0.0585984
CHD5	3.78613	1.92072	0.00174278	0.0586708
ACBD7	2.57091	1.36228	0.00174951	0.0587446
RPS3	1.6444	0.717564	0.0017534	0.0587446
CCDC23	1.41169	0.497426	0.00175653	0.0587446
C7orf26	0.76312	-0.390018	0.00175868	0.0587446
TMEM161B	0.629428	-0.667886	0.0017593	0.0587446
PCBD2	0.655565	-0.60919	0.00177314	0.0591105
MTX3	0.655136	-0.610134	0.00179149	0.0594395
PEX14	1.39256	0.47774	0.00179414	0.0594395
FOXO4	0.455717	-1.13379	0.0017973	0.0594395
PDGFRL	3.27436	1.71121	0.00179761	0.0594395
DHTKD1	0.649797	-0.62194	0.00179772	0.0594395
GPR98	0.118455	-3.07759	0.00180041	0.0594395
P4HA3	3.12717	1.64486	0.00181505	0.0595223
PCDHA2	4.36355	2.1255	0.00181788	0.0595223
SLC20A1	1.85892	0.894467	0.00182027	0.0595223
FTO	0.659088	-0.601457	0.00182304	0.0595223
DNAH9	0.264097	-1.92086	0.00182525	0.0595223
C1RL	0.395408	-1.33859	0.00182654	0.0595223
AGPAT4	2.77232	1.4711	0.0018275	0.0595223
PLAG1	3.23712	1.69471	0.00182946	0.0595223
DHDPSL	0.193967	-2.36612	0.00183152	0.0595223
COLEC11	0.348564	-1.5205	0.00183237	0.0595223
CUZD1	2.24524	1.16687	0.00183485	0.0595223
SPC25	3.83749	1.94016	0.00183867	0.0595453
PRPF8	0.762748	-0.390721	0.00184577	0.0595453
IQGAP3	3.27928	1.71338	0.00184702	0.0595453
ALDH6A1	0.461742	-1.11484	0.00185252	0.0595453
HDHD1A	0.587597	-0.767101	0.00185272	0.0595453
BOD1	0.745172	-0.424355	0.00185299	0.0595453
RPS2	1.64155	0.715056	0.00186087	0.0596129
UBXN1	1.4733	0.559047	0.00186631	0.0596129
AMACR	0.586084	-0.770819	0.00186905	0.0596129
CDCA3	2.9341	1.55292	0.00186924	0.0596129
RARRES2	0.165822	-2.59229	0.00186963	0.0596129
BBS9	0.665848	-0.586736	0.00187763	0.0596353
ZNF397	0.643389	-0.636237	0.00187853	0.0596353
LPCAT4	1.85549	0.891798	0.00188141	0.0596353
RNASET2	1.66746	0.737652	0.00188505	0.0596353
ANGEL1	0.645193	-0.632198	0.00188543	0.0596353
CHIC1	0.582237	-0.780322	0.00191036	0.0596353
C7orf46	0.557858	-0.842029	0.00191148	0.0596353
KREMEN2	4.24966	2.08735	0.00191179	0.0596353
UBR3	0.661987	-0.595124	0.00191851	0.0596353
CENPO	1.79765	0.846112	0.00191855	0.0596353
NPFF	1.95107	0.964264	0.00191869	0.0596353
PLD3	1.67216	0.74171	0.0019194	0.0596353
ZNF681	2.72452	1.446	0.00192066	0.0596353
ALDH2	0.497846	-1.00623	0.00192112	0.0596353
GNL2	1.40923	0.494907	0.00192119	0.0596353
CCNDBP1	0.577503	-0.792099	0.00192195	0.0596353
H1FX	1.58391	0.663487	0.00192236	0.0596353
NAV2	2.08855	1.0625	0.00192269	0.0596353
GTPBP10	0.717213	-0.479526	0.00192624	0.0596552
ZNF449	0.633765	-0.657981	0.00193211	0.0597467
SLC1A2	0.233619	-2.09777	0.00194157	0.0599488
FHL3	2.08107	1.05733	0.00195057	0.0600036
TGFB1	2.22948	1.15671	0.00195186	0.0600036
AIDA	1.36887	0.452984	0.0019598	0.0600036
AURKA	2.15807	1.10974	0.00196106	0.0600036
KCNK13	3.4319	1.77901	0.00196683	0.0600036
EN2	4.28097	2.09794	0.00196822	0.0600036
AGFG2	0.530273	-0.915194	0.00196853	0.0600036
RNF14	0.598024	-0.741724	0.0019694	0.0600036
HOXD13	4.27751	2.09677	0.00196968	0.0600036
AKAP6	0.429739	-1.21847	0.00198202	0.06029
LOC729991-MEF2B	1.70083	0.76624	0.00198789	0.0603788
HNRNPD	1.3349	0.416727	0.00200038	0.0606682
PHKB	0.660505	-0.598358	0.00201508	0.0610237
NAP1L4	1.37449	0.458892	0.00202186	0.0610722
LMTK2	0.363843	-1.45861	0.00202263	0.0610722
NOX4	2.68291	1.4238	0.00203568	0.0613759
ZNF781	2.42958	1.28071	0.00205267	0.0617882
LOC642846	1.7223	0.784338	0.00205539	0.0617882
DNAJB9	0.557814	-0.842143	0.00205994	0.0618343
MAT2B	0.642788	-0.637586	0.00206472	0.0618874
PCCB	0.695405	-0.524075	0.0020684	0.0619071
HSD17B4	0.610755	-0.711334	0.00207672	0.0620655
FBXL17	0.664121	-0.590482	0.00208571	0.0622434
IRF3	1.42314	0.509076	0.0020907	0.0623018
PRKAG2	0.594561	-0.750104	0.00209413	0.0623132
EEF1G	1.54676	0.629253	0.002109	0.0623943
SYNM	0.54761	-0.868779	0.00211447	0.0623943
KIAA2013	1.37216	0.456444	0.00211578	0.0623943
B3GAT3	1.47713	0.5628	0.00211599	0.0623943
LMBRD1	0.559076	-0.838883	0.00211683	0.0623943
RAC3	3.18465	1.67114	0.00211683	0.0623943
DUS4L	0.685089	-0.545636	0.00211816	0.0623943
PPIE	1.2851	0.361885	0.00212726	0.0625727
TMEM199	0.792464	-0.335582	0.0021315	0.0626075
RTN4RL2	2.4043	1.26562	0.00214805	0.0630034
BCORL2	1.87627	0.907865	0.00216516	0.0634143
ADIPOR2	0.689821	-0.535707	0.0021718	0.0634353
FOXE1	4.92381	2.29978	0.00217389	0.0634353
ANKLE1	2.20595	1.1414	0.0021761	0.0634353
YBX1	1.45504	0.54106	0.00218039	0.0634353
ARPC5	1.50434	0.589135	0.0021857	0.0634353
VPS13C	0.646369	-0.62957	0.0021871	0.0634353
OXTR	2.27862	1.18816	0.00218806	0.0634353
TXNRD1	0.65364	-0.613433	0.00219237	0.0634353
PRC1	2.65289	1.40757	0.0021961	0.0634353
FOXL1	3.61209	1.85283	0.00219681	0.0634353
TOM1L1	0.521512	-0.939228	0.00220712	0.0636433
FLJ12825	2.20148	1.13847	0.00221287	0.0637195
FRS3	1.44552	0.531588	0.00222926	0.0641013
FBXW5	1.40232	0.487815	0.00224173	0.0643697
PTPRCAP	2.34899	1.23204	0.00224667	0.0644212
CDC6	2.17395	1.12032	0.00225723	0.0646336
CPEB4	0.466672	-1.09952	0.00226974	0.0647296
IGFBP3	2.36916	1.24438	0.00227769	0.0647296
C19orf22	1.3885	0.473523	0.00227801	0.0647296
MEX3A	2.60849	1.38321	0.00227807	0.0647296
NME4	1.91169	0.93485	0.00227954	0.0647296
NUP188	1.46345	0.549375	0.00227994	0.0647296
TDRD1	0.731949	-0.450186	0.00228268	0.0647296
CDC25C	2.9949	1.58251	0.00229006	0.0648491
SGOL2	2.00097	1.0007	0.00230098	0.064894
ZNF833	2.03503	1.02505	0.00230187	0.064894
AOX1	0.404477	-1.30587	0.0023055	0.064894
CENPA	3.2998	1.72238	0.00230856	0.064894
FAM111B	3.18082	1.6694	0.00231034	0.064894
RRAGB	0.545775	-0.873622	0.00231348	0.064894
C1orf159	1.59028	0.669279	0.0023138	0.064894
AURKB	3.84808	1.94414	0.00233065	0.0650179
RBM14	1.22177	0.288967	0.00233556	0.0650179
C5orf22	0.701656	-0.511165	0.00233594	0.0650179
FBXO46	1.42684	0.512821	0.00233615	0.0650179
FUT4	1.6516	0.72386	0.00233762	0.0650179
NUDT6	0.567379	-0.817616	0.00234102	0.0650179
LOC399815	2.03344	1.02392	0.00234382	0.0650179
ABHD2	0.53835	-0.893383	0.0023449	0.0650179
BUB1B	2.73467	1.45137	0.00234676	0.0650179
MAPK8IP2	0.329135	-1.60325	0.00236473	0.0654273
CBR3	2.87493	1.52353	0.00237677	0.0654421
DYNLRB1	1.50229	0.587162	0.00238008	0.0654421
2021-09-11	1.67426	0.74352	0.00238103	0.0654421
FANCI	1.93624	0.95326	0.00238412	0.0654421
C1orf77	1.26091	0.33446	0.00238558	0.0654421
CBX8	1.74826	0.805922	0.00238755	0.0654421
PHF16	0.585092	-0.773264	0.00238761	0.0654421
KIF4A	3.363	1.74975	0.00240455	0.0658185
HGS	1.32974	0.411148	0.00241336	0.0658888
EDA2R	0.364976	-1.45412	0.00241513	0.0658888
JUND	1.75798	0.813915	0.00241676	0.0658888
IL4I1	1.87104	0.903843	0.00242581	0.0660479
DLGAP3	2.81399	1.49262	0.00242957	0.0660624
MRC2	4.32613	2.11308	0.00243517	0.066127
POLR2H	1.4235	0.509442	0.00244209	0.0662272
MGC12982	2.64242	1.40186	0.00245736	0.0663242
CDKL1	0.390778	-1.35558	0.00246086	0.0663242
MUT	0.637616	-0.649241	0.00246111	0.0663242
CDK19	1.54998	0.632246	0.00246885	0.0663242
URGCP	0.700128	-0.514309	0.00247176	0.0663242
DRAP1	1.52826	0.611886	0.00247346	0.0663242
MICAL1	2.38295	1.25275	0.00247642	0.0663242
MLXIPL	0.195876	-2.35199	0.00248032	0.0663242
PTTG3P	2.42654	1.2789	0.00248416	0.0663242
HMG20B	1.40028	0.485718	0.00248777	0.0663242
DUOX1	0.307432	-1.70166	0.00248814	0.0663242
STK25	1.3713	0.455545	0.00249608	0.0663242
TTC33	0.649965	-0.621565	0.00250221	0.0663242
YWHAZ	1.31613	0.3963	0.00250471	0.0663242
MTMR15	0.715708	-0.482557	0.0025074	0.0663242
SHCBP1	3.69927	1.88724	0.00250775	0.0663242
FAM10A4	0.68395	-0.548036	0.00251194	0.0663242
SLC30A5	0.740941	-0.432568	0.00251223	0.0663242
KBTBD7	0.430578	-1.21565	0.00251286	0.0663242
SULT1A2	0.369237	-1.43738	0.00251599	0.0663242
UBR1	0.604657	-0.725812	0.00251932	0.0663242
NUMBL	1.84494	0.883574	0.00252006	0.0663242
RAD54B	1.81462	0.859668	0.00252216	0.0663242
BVES	2.72249	1.44493	0.00252331	0.0663242
PDIA2	2.89152	1.53183	0.00253086	0.0664375
NFYA	1.40625	0.491855	0.00254191	0.0666422
HPDL	2.99533	1.58271	0.00254972	0.0667616
LACTB2	0.66288	-0.593181	0.00255627	0.0668477
SLC25A22	1.812	0.857583	0.00256271	0.0668712
CCDC88A	1.49667	0.581757	0.00256369	0.0668712
NAGK	1.42001	0.505906	0.00257252	0.066969
FMO3	0.215413	-2.21482	0.00257397	0.066969
FJX1	1.86601	0.89996	0.00257925	0.0669862
KIAA0564	0.641636	-0.640172	0.00258441	0.0669862
NRARP	1.92955	0.948263	0.00258935	0.0669862
MLYCD	0.595464	-0.747913	0.00259107	0.0669862
ATP9B	0.727033	-0.459907	0.0025922	0.0669862
MEX3D	1.76243	0.817563	0.00259424	0.0669862
RFC2	1.52085	0.604877	0.00260081	0.0670715
DLK2	3.12885	1.64563	0.00260732	0.0671549
C6orf138	0.30329	-1.72123	0.00261621	0.0672992
MORC4	0.486866	-1.0384	0.00262713	0.0674954
NRM	1.86223	0.897029	0.00263202	0.067527
COL6A2	2.31117	1.20862	0.00263494	0.067527
PFN1	1.44245	0.528518	0.00264496	0.0676679
TMEM62	0.666715	-0.584858	0.00264704	0.0676679
EIF2C2	1.65547	0.727243	0.00265228	0.0677174
IL1F7	1.44885	0.534911	0.00265853	0.0677924
PDE12	0.718685	-0.476568	0.00266464	0.0678639
SCNM1	1.48639	0.571809	0.00268412	0.0682752
DERL3	2.23062	1.15744	0.00268998	0.0683152
CORO1B	1.47435	0.560081	0.00269262	0.0683152
SSBP4	1.71063	0.774526	0.00270012	0.0683152
SMPD4	1.39715	0.482487	0.00270019	0.0683152
KLK7	0.447016	-1.1616	0.00270363	0.0683152
RBM42	1.4243	0.510252	0.00270569	0.0683152
SLFN5	0.39511	-1.33968	0.00273028	0.0688515
SETD8	1.45203	0.538075	0.00273971	0.0688839
MRPS33	0.681717	-0.552754	0.00274211	0.0688839
CXADR	0.345837	-1.53183	0.002748	0.0688839
TTK	2.69865	1.43224	0.00274911	0.0688839
BRCA1	2.04379	1.03125	0.00275083	0.0688839
APOOL	0.489138	-1.03169	0.00275173	0.0688839
METTL7A	0.426682	-1.22877	0.00276719	0.0690396
NDUFA4	0.699726	-0.515137	0.00277058	0.0690396
MAD1L1	1.38749	0.472477	0.0027719	0.0690396
TTBK2	0.561653	-0.832249	0.00277417	0.0690396
HEY2	2.4993	1.32152	0.00277479	0.0690396
CSDA	1.51297	0.597387	0.00279309	0.0694108
ADAM8	2.11202	1.07862	0.00280227	0.0695426
NECAP2	1.41628	0.502108	0.00280517	0.0695426
PEX12	0.634654	-0.655958	0.00281376	0.0695984
LPAR2	2.41936	1.27463	0.00281738	0.0695984
ZNF655	0.714539	-0.484915	0.00282151	0.0695984
C2orf39	1.57315	0.653657	0.00283288	0.0695984
KCTD18	0.725191	-0.463567	0.00283512	0.0695984
PCGF1	1.34351	0.42601	0.00283525	0.0695984
GNG5	1.53455	0.617815	0.00283708	0.0695984
RNF180	0.377801	-1.4043	0.00283741	0.0695984
RPL27A	1.71475	0.777995	0.00283798	0.0695984
EAF2	1.69867	0.764404	0.00284734	0.0697446
DCLRE1C	1.49579	0.580907	0.0028623	0.0699408
RPAP1	0.681041	-0.554186	0.0028641	0.0699408
MELK	3.60124	1.84849	0.00286625	0.0699408
NUP85	1.42353	0.509472	0.002869	0.0699408
MAP3K11	1.32883	0.410152	0.00288501	0.0702475
MTMR10	0.715435	-0.483107	0.00289011	0.0702884
REXO4	1.34975	0.432694	0.00293943	0.071403
KIF20A	3.57255	1.83695	0.00295104	0.0716002
PCDHA1	4.91492	2.29717	0.00296525	0.07186
PITPNA	0.760181	-0.395586	0.00296896	0.071865
TAF1	0.652978	-0.614894	0.00297425	0.0719081
RRAS2	1.61731	0.693597	0.00298593	0.0721055
FAM167A	3.21637	1.68543	0.00299646	0.0721711
ATXN7L3	1.32482	0.405799	0.00299757	0.0721711
TWIST2	3.11295	1.63828	0.00300218	0.0721711
FOXP4	1.4501	0.536152	0.00300273	0.0721711
GEFT	2.37174	1.24595	0.00300814	0.0721848
SCLT1	1.41934	0.505218	0.00301284	0.0721848
FZD2	2.24729	1.16819	0.0030141	0.0721848
FAM63B	0.516232	-0.953908	0.00301738	0.0721848
ARMC4	0.272466	-1.87585	0.00302155	0.0722001
CEP164	1.42866	0.514658	0.0030253	0.0722057
PPA2	0.676987	-0.562801	0.00303233	0.0722299
SPATA18	0.325944	-1.6173	0.00303336	0.0722299
PLK4	2.02617	1.01876	0.00304547	0.0723608
TMEM184C	0.651958	-0.61715	0.00304592	0.0723608
APLP2	1.43071	0.51673	0.00306759	0.072729
KIF14	3.09688	1.63081	0.0030717	0.072729
CNTNAP1	2.28343	1.1912	0.00307206	0.072729
CPNE2	1.67979	0.748277	0.00307845	0.0727964
KRTAP5-10	1.67465	0.743857	0.0030907	0.0730018
CADPS2	0.538272	-0.893592	0.00310179	0.0731478
FAM65C	0.297862	-1.74728	0.00310545	0.0731478
COL15A1	2.60374	1.38059	0.00310759	0.0731478
HOXD11	4.83356	2.27308	0.00311715	0.0731649
SLCO1C1	2.11079	1.07778	0.00312322	0.0731649
GOLGA4	0.650362	-0.620685	0.00312505	0.0731649
PIF1	2.72248	1.44492	0.0031261	0.0731649
RHOG	1.51768	0.601868	0.0031262	0.0731649
C12orf48	1.96774	0.976539	0.00312973	0.0731649
WIPF1	1.87484	0.906768	0.00314494	0.0734368
RCBTB1	0.59999	-0.736989	0.00316064	0.0737195
NUDT5	1.44784	0.533904	0.00316913	0.0738334
CCDC87	0.57959	-0.786895	0.00319499	0.0743515
KIAA1908	0.498382	-1.00468	0.00320451	0.0743525
GSG2	2.23475	1.16011	0.00320493	0.0743525
ARMCX5	0.696299	-0.522222	0.00320591	0.0743525
FAM138F	1.7989	0.847113	0.00323055	0.0748392
C11orf73	1.36321	0.447006	0.00323785	0.0748864
BOLA3	1.57092	0.651608	0.0032402	0.0748864
TMEM105	3.68733	1.88258	0.00324354	0.0748864
TPRKB	1.44785	0.533916	0.00325099	0.0749739
YWHAH	1.61742	0.693695	0.00326043	0.0750607
ISY1	1.28453	0.361236	0.00326337	0.0750607
ADH1B	0.179712	-2.47624	0.00326701	0.0750607
SLC25A4	0.561009	-0.833904	0.0032694	0.0750607
TMEM209	0.676074	-0.564746	0.00328114	0.0751905
METTL10	1.37934	0.463977	0.00328451	0.0751905
RELA	1.22638	0.294404	0.00328605	0.0751905
KIAA1370	0.669302	-0.57927	0.00330103	0.0754489
HMGN1	1.5516	0.633758	0.00332417	0.0757157
SKA2	1.48494	0.570408	0.00332441	0.0757157
HMGA2	6.33839	2.66412	0.00332696	0.0757157
PFN4	1.77546	0.82819	0.00333365	0.0757157
FBXW11	0.671755	-0.573994	0.00333474	0.0757157
FBXO10	1.98187	0.986866	0.00333486	0.0757157
C11orf24	1.5836	0.663211	0.00333874	0.07572
RHOT1	0.719426	-0.475081	0.0033429	0.0757306
CSPG5	2.15384	1.10691	0.00335132	0.0758376
FAM98B	0.634931	-0.655328	0.003363	0.0759368
SYCE1L	2.47246	1.30594	0.00336311	0.0759368
UHRF1BP1L	0.706078	-0.502101	0.00337368	0.0760161
MLH3	0.483869	-1.04731	0.00337405	0.0760161
KIAA0802	3.45331	1.78798	0.00339222	0.0762726
GPR4	2.36999	1.24488	0.00339287	0.0762726
CKAP2L	3.32748	1.73443	0.00340979	0.0765691
MBTPS2	0.655062	-0.610296	0.00341847	0.07668
CCNB2	3.46547	1.79305	0.00342435	0.0767279
UBE2G1	0.820774	-0.284942	0.00343041	0.0767797
EZH2	2.08907	1.06286	0.00343844	0.0768756
TSSC1	1.37213	0.456421	0.00344373	0.0768813
NCRNA00029	2.14595	1.10161	0.00344925	0.0768813
GGH	2.15546	1.10799	0.00344995	0.0768813
TMEM116	0.692276	-0.53058	0.0034571	0.0769126
C9orf21	1.47187	0.557646	0.00345885	0.0769126
CBLL1	0.713669	-0.486673	0.00346489	0.0769633
DET1	0.666638	-0.585025	0.00347437	0.0770556
BCKDHB	0.632375	-0.661148	0.00348128	0.0770556
NCRNA00185	3.40012	1.76559	0.00349117	0.0770556
CCDC108	2.37302	1.24673	0.00349386	0.0770556
ACE	2.08841	1.06241	0.00349569	0.0770556
SOX8	4.7884	2.25954	0.0034986	0.0770556
ALKBH6	1.56429	0.645507	0.00350062	0.0770556
ZNF738	2.25199	1.1712	0.00350355	0.0770556
MRPL52	1.3945	0.479747	0.0035049	0.0770556
ABL1	1.31926	0.399726	0.00350663	0.0770556
RIBC2	3.14027	1.65089	0.00351657	0.0771881
ZKSCAN1	0.584081	-0.775759	0.00352019	0.0771881
SNX2	0.688262	-0.53897	0.00353181	0.0771971
GRIK1	2.26065	1.17674	0.00353183	0.0771971
MKI67	3.27816	1.71289	0.00353189	0.0771971
REEP4	1.74948	0.806928	0.0035547	0.0776129
CYP11B1	0.070998	-3.81608	0.00357987	0.0779789
MBNL2	0.674453	-0.56821	0.00357996	0.0779789
TRIM25	0.734957	-0.444268	0.00358632	0.0779789
RNLS	0.428998	-1.22096	0.00358668	0.0779789
FAM27A	2.59791	1.37735	0.00359149	0.0780009
CD24	3.69514	1.88563	0.0035959	0.078014
PPID	0.748645	-0.417646	0.00360671	0.0781015
LRRC8E	0.328512	-1.60598	0.00360989	0.0781015
ZNF580	1.52806	0.611703	0.00361137	0.0781015
NFYC	1.26252	0.336309	0.00361824	0.0781677
UBE2T	2.23016	1.15715	0.00362974	0.0782693
DNAJC9	1.4882	0.573572	0.00363058	0.0782693
PBK	3.63515	1.86202	0.00363632	0.0783107
SMAP2	1.40725	0.492875	0.00365322	0.0785484
THUMPD2	1.41043	0.496137	0.00365502	0.0785484
CENPH	1.83831	0.878381	0.00366656	0.078714
SEC11C	0.640824	-0.642	0.00367693	0.078854
C14orf143	1.43859	0.524654	0.0036857	0.0789552
C1QTNF2	2.76775	1.46872	0.00368935	0.0789552
TRIM56	0.52401	-0.932334	0.00371458	0.0792131
H2AFZ	1.64701	0.719846	0.0037188	0.0792131
COL11A2	2.31483	1.21091	0.00373205	0.0792131
GPR35	2.11152	1.07828	0.00373355	0.0792131
LRRC25	0.412111	-1.27889	0.00373677	0.0792131
CCDC150	2.43088	1.28148	0.00373791	0.0792131
C4orf41	0.727092	-0.459789	0.00374072	0.0792131
C6orf129	1.54069	0.62358	0.00374143	0.0792131
DEPDC1B	2.77532	1.47265	0.00374145	0.0792131
MAN1B1	1.42361	0.509555	0.00374274	0.0792131
NCRNA00092	1.83491	0.875712	0.00374501	0.0792131
TRAM2	1.60206	0.679928	0.00374776	0.0792131
GLYATL2	2.15554	1.10805	0.0037557	0.0792381
NAPEPLD	0.720915	-0.472099	0.00375668	0.0792381
OSBPL3	2.24364	1.16584	0.00376812	0.0793977
MASTL	1.63003	0.704901	0.00378026	0.0795717
NAT14	2.0794	1.05616	0.00378595	0.0796097
GRB2	1.25398	0.326511	0.00380169	0.0798477
GTSE1	2.98335	1.57693	0.00380735	0.0798477
SLC15A2	2.43981	1.28677	0.00380895	0.0798477
CCDC14	1.60987	0.686941	0.00381861	0.0799685
DAPK3	1.43528	0.52133	0.00383074	0.0801407
HNRNPH2	0.720751	-0.472428	0.00383686	0.0801868
LOC100270710	2.57123	1.36246	0.00385385	0.0804586
SPG20	0.679311	-0.557856	0.00385832	0.0804586
DENND5A	1.41686	0.5027	0.00386163	0.0804586
LYRM1	0.720929	-0.472071	0.003871	0.0805008
POLR3B	0.695116	-0.524674	0.00387152	0.0805008
POLE	1.54344	0.626148	0.00388875	0.0807542
C2orf48	2.44534	1.29004	0.00389391	0.0807542
AQR	0.726545	-0.460876	0.00389552	0.0807542
PLAUR	2.60288	1.38011	0.00390855	0.0808517
NT5C	1.65853	0.729907	0.00391089	0.0808517
EMP2	2.33643	1.22431	0.00391232	0.0808517
MTM1	0.520418	-0.942257	0.003916	0.0808517
RBBP7	0.601394	-0.733618	0.00392044	0.080862
PITX2	2.82541	1.49846	0.00392459	0.0808662
MAP2K5	0.569407	-0.812468	0.00394429	0.0811905
LRRN4CL	0.270859	-1.88439	0.00395386	0.0813059
LYSMD3	0.641507	-0.640464	0.0039624	0.0813187
MMP17	4.70413	2.23393	0.00396241	0.0813187
METTL14	0.631805	-0.662448	0.00397169	0.0814221
COX18	0.622535	-0.683773	0.00397539	0.0814221
MRPL46	0.632416	-0.661055	0.00398172	0.0814703
SKA1	3.01186	1.59065	0.00400973	0.0819616
WDR73	0.755254	-0.404966	0.00402078	0.08205
FBXO22	0.706488	-0.501263	0.00402206	0.08205
C1orf26	0.748753	-0.417439	0.00403546	0.0822415
OGDH	0.642373	-0.638516	0.00404479	0.0823459
SF3B4	1.47844	0.564078	0.00404861	0.0823459
C3orf21	1.40165	0.487124	0.00405486	0.0823506
KCNJ11	0.325456	-1.61946	0.00406352	0.0823506
SLC4A9	0.655259	-0.609862	0.00406507	0.0823506
GJC2	2.5444	1.34733	0.00406853	0.0823506
APH1B	0.649283	-0.623081	0.00406961	0.0823506
FOXA2	5.57619	2.47928	0.00407294	0.0823506
GRIN2D	2.64496	1.40325	0.00407806	0.0823729
TUBB6	1.80889	0.855108	0.00408493	0.0824303
CDADC1	0.70806	-0.498057	0.00412843	0.0832262
CRCP	0.766407	-0.383817	0.00414247	0.0833965
MGST1	0.374083	-1.41857	0.00414501	0.0833965
USP2	0.294557	-1.76338	0.00418624	0.0841435
CABC1	0.497575	-1.00701	0.00419368	0.0842103
H3F3B	1.4576	0.543592	0.00419858	0.0842262
ZNF273	1.68003	0.748485	0.00420495	0.0842717
ZC3H7A	0.768338	-0.380187	0.00421242	0.0843389
C13orf33	2.62628	1.39302	0.00424808	0.0849698
BBS2	0.612015	-0.708361	0.0042534	0.0849935
RPL13AP20	1.69131	0.758139	0.00425854	0.0850132
TTC7A	0.66113	-0.596994	0.00427196	0.0851468
WFIKKN2	0.168986	-2.56502	0.00427354	0.0851468
NEK2	3.25625	1.70321	0.00428749	0.0851759
LIG4	0.604211	-0.726876	0.00428885	0.0851759
LARS	0.793231	-0.334187	0.00429153	0.0851759
EXT2	1.25292	0.32529	0.00429161	0.0851759
LRFN4	2.25544	1.17341	0.00430101	0.085257
CASD1	0.691057	-0.533123	0.00430402	0.085257
ZBTB34	1.4964	0.581498	0.00431533	0.0852777
NFKB2	1.46844	0.554284	0.00432075	0.0852777
ITFG1	0.638497	-0.647248	0.00432639	0.0852777
P2RX6	0.245739	-2.0248	0.00433177	0.0852777
ABCB7	0.681368	-0.553494	0.00433493	0.0852777
EPR1	3.59599	1.84639	0.00433555	0.0852777
UBXN11	1.52664	0.610362	0.00433657	0.0852777
ACTR3B	0.670674	-0.576317	0.00433834	0.0852777
ANKRD13B	1.90478	0.929622	0.00434326	0.0852926
MCEE	0.736505	-0.441233	0.00436207	0.0853863
SLC7A4	0.12004	-3.05842	0.00436246	0.0853863
BTBD2	1.34401	0.426548	0.00436312	0.0853863
ZC3H3	1.54729	0.629747	0.00436469	0.0853863
TTTY15	6.36362	2.66985	0.00437889	0.0855824
C5orf36	0.626492	-0.674633	0.00439345	0.0856682
KCNK7	1.82171	0.865292	0.00439493	0.0856682
ISPD	0.610313	-0.712379	0.00439581	0.0856682
HMX2	4.45919	2.15678	0.0044004	0.0856762
FKBP11	1.90261	0.92798	0.00441192	0.0858189
SNN	0.527941	-0.92155	0.00443514	0.0860716
ACD	1.45255	0.538587	0.00443543	0.0860716
RGL2	1.42354	0.509487	0.0044375	0.0860716
KLHL17	1.86135	0.896349	0.0044463	0.0861607
HDGF	1.47395	0.559688	0.00447501	0.0865599
CNTNAP4	1.99022	0.99293	0.00447534	0.0865599
TMC7	2.03351	1.02397	0.00448064	0.0865806
C6orf147	2.29554	1.19883	0.00449403	0.0866882
LOC92659	1.8073	0.853837	0.00449466	0.0866882
BAMBI	0.298434	-1.74452	0.00450023	0.0867053
AASDH	0.691149	-0.532931	0.00450673	0.0867053
ALDH5A1	0.507397	-0.978813	0.00450824	0.0867053
NEIL3	3.13651	1.64916	0.00451863	0.0867915
SPHKAP	3.43092	1.7786	0.00452119	0.0867915
MTX1	1.50104	0.585959	0.00452638	0.0868099
NAB2	1.69853	0.76429	0.00453088	0.0868151
EXOC7	1.30007	0.378587	0.00454068	0.0869215
RXFP1	0.435153	-1.2004	0.00454647	0.0869512
TP73	3.42101	1.77442	0.00455667	0.0869932
FOXK2	1.38383	0.468672	0.00456506	0.0869932
MPHOSPH8	0.669076	-0.579758	0.00457362	0.0869932
BMP7	6.89287	2.78511	0.00457692	0.0869932
USP25	0.716152	-0.481661	0.00457931	0.0869932
C7orf30	0.704737	-0.504843	0.00457937	0.0869932
RNF111	0.691899	-0.531366	0.00458316	0.0869932
SLC22A5	0.557015	-0.844213	0.00458582	0.0869932
C1orf86	1.47834	0.563974	0.0045896	0.0869932
HAUS8	1.82606	0.868732	0.00459816	0.0869932
DBN1	1.99501	0.996399	0.0046003	0.0869932
KIAA0101	2.91161	1.54182	0.00460057	0.0869932
BBX	0.718594	-0.476751	0.00460736	0.0869932
PTPN11	0.718315	-0.477311	0.00461041	0.0869932
CEP120	0.695	-0.524915	0.00461231	0.0869932
HOXB13	6.25756	2.6456	0.00461678	0.0869974
CSTF2T	0.681407	-0.553412	0.00462692	0.0871084
LOC646471	0.518869	-0.946558	0.0046375	0.0872276
ARFIP2	1.35159	0.434653	0.0046528	0.0874351
ZNF511	1.36103	0.444701	0.00467479	0.0877679
CLEC11A	1.89056	0.918811	0.004689	0.0879542
C9orf50	1.77844	0.830616	0.00469499	0.0879861
GLRX5	0.720022	-0.473886	0.00470822	0.0881534
AP1G2	1.95825	0.969562	0.00472346	0.088358
FANCB	1.90837	0.932339	0.00473732	0.0885366
WDR18	1.72073	0.783022	0.00474186	0.0885407
AUH	0.611129	-0.710452	0.00475905	0.0886881
VOPP1	1.65524	0.727042	0.0047597	0.0886881
ZNF367	2.27558	1.18623	0.00476274	0.0886881
NXPH4	3.88475	1.95782	0.00476908	0.0887256
ELAC2	0.790725	-0.338752	0.00477619	0.0887773
THAP5	0.740451	-0.433523	0.00478986	0.0888582
PPP1R9A	0.436513	-1.19591	0.00479343	0.0888582
OSBPL5	1.53204	0.615458	0.00479477	0.0888582
MATN4	1.68084	0.749181	0.00479932	0.0888582
EID1	0.729827	-0.454374	0.00480264	0.0888582
TRIM8	1.40957	0.495259	0.00481356	0.0888582
C6orf26	2.1321	1.09228	0.00481978	0.0888582
ADAMTS9	1.94598	0.9605	0.00482449	0.0888582
PTCD1	0.772793	-0.371846	0.00482712	0.0888582
ANLN	2.76502	1.46729	0.00482814	0.0888582
FECH	0.670624	-0.576423	0.00482956	0.0888582
C12orf72	0.645747	-0.630959	0.00483255	0.0888582
SIPA1L2	1.7104	0.774332	0.0048455	0.0890165
OTX1	2.415	1.27202	0.00486821	0.0893518
EGR4	2.5926	1.3744	0.00487246	0.0893518
RPL7A	1.50469	0.589462	0.00488737	0.089545
ANKRD5	0.491193	-1.02564	0.0048954	0.0896121
DYNLT1	1.4548	0.540824	0.00490304	0.0896196
GANAB	1.30201	0.380737	0.00490455	0.0896196
ANAPC11	1.41823	0.504096	0.00491007	0.0896405
CYB5D1	0.710557	-0.492977	0.00492801	0.0898291
SF3A2	1.51319	0.597593	0.00493026	0.0898291
CLTA	1.35411	0.43734	0.00493355	0.0898291
PLEC	1.44862	0.53468	0.00494776	0.0900079
NOP2	1.39086	0.475981	0.00497665	0.0904084
CD46	0.56027	-0.835806	0.00497859	0.0904084
PLK1	3.04122	1.60465	0.00498409	0.0904281
CCNA2	2.51463	1.33035	0.00499267	0.0905037
TMEM39B	1.44553	0.531603	0.00501247	0.0907823
KCTD16	0.500469	-0.998648	0.00503755	0.0911049
RAD51L1	1.39354	0.47875	0.00503917	0.0911049
ALX4	3.95907	1.98516	0.00504639	0.0911551
CLDN6	1.66152	0.732505	0.00507331	0.0913437
LRRC45	1.58296	0.662621	0.00507491	0.0913437
COL5A1	2.55059	1.35083	0.00507639	0.0913437
ELFN1	1.91895	0.940318	0.00507696	0.0913437
WBSCR27	0.399124	-1.32509	0.00508617	0.0913437
UBXN10	0.182208	-2.45634	0.00508657	0.0913437
TSEN54	1.37879	0.463408	0.00509065	0.0913437
MDN1	0.636063	-0.652759	0.00509247	0.0913437
THNSL1	0.606272	-0.721963	0.00511029	0.0915831
UNC45A	0.728322	-0.457352	0.00511731	0.0916288
KLF12	2.36059	1.23915	0.00512473	0.0916816
SURF2	1.51096	0.595465	0.00514115	0.0918953
FN3KRP	1.41321	0.498979	0.0051587	0.0921286
DDX11	1.69973	0.765303	0.00516507	0.0921286
UCN2	1.92917	0.947982	0.00516873	0.0921286
HOXC13	5.27076	2.39801	0.00517218	0.0921286
RCN1	1.57806	0.658149	0.00518583	0.0922363
HIATL1	1.41114	0.496861	0.00519131	0.0922363
RAB15	2.29999	1.20163	0.00519172	0.0922363
PLCXD1	2.00505	1.00364	0.00520868	0.0924575
UBQLN2	0.655199	-0.609995	0.00521538	0.0924963
C9orf44	0.393078	-1.34711	0.00522201	0.0925339
UBAC1	1.33161	0.413169	0.00523032	0.0926011
TPI1P2	0.55127	-0.859169	0.00525594	0.0929266
DCDC2	0.246371	-2.02109	0.00526081	0.0929266
NCAPD2	1.59182	0.670678	0.00526532	0.0929266
COL4A1	1.91487	0.937244	0.00526684	0.0929266
PACSIN1	0.34346	-1.54179	0.00528063	0.0930874
WBSCR17	0.122692	-3.02689	0.00528814	0.0930874
RPL11	1.48485	0.570316	0.00528957	0.0930874
RPP30	1.25476	0.327409	0.00530449	0.0932699
ZBTB32	1.79384	0.843051	0.00532099	0.0934799
PRDM8	2.90435	1.53822	0.00532889	0.0935384
C15orf58	0.645848	-0.630734	0.00534434	0.0937213
FLJ44606	0.499098	-1.00261	0.00534845	0.0937213
C9orf140	2.77477	1.47237	0.00536374	0.0938048
C17orf39	0.795089	-0.330811	0.00536424	0.0938048
SNAPC5	0.710089	-0.493928	0.00537447	0.0938048
PTPRVP	0.426309	-1.23003	0.005378	0.0938048
ANKRD31	0.557336	-0.843379	0.00537948	0.0938048
HEATR4	0.616592	-0.697612	0.00538334	0.0938048
DEPDC7	2.70688	1.43663	0.00538524	0.0938048
TMEM167A	0.705699	-0.502876	0.0053966	0.0938271
FEN1	1.75125	0.808383	0.00539819	0.0938271
CDKN3	2.76334	1.46641	0.00540026	0.0938271
EHBP1L1	2.12504	1.08749	0.00541527	0.0939734
FLJ40330	2.46766	1.30314	0.00541954	0.0939734
C1orf112	1.60544	0.682973	0.00542242	0.0939734
VAMP4	0.744199	-0.426239	0.00543037	0.0940284
C3orf70	2.15814	1.10979	0.00543477	0.0940284
RPS6	1.47487	0.560591	0.00544341	0.0940984
FAM71D	1.48672	0.572133	0.00544832	0.0941039
KAZALD1	2.6551	1.40877	0.0054666	0.0942488
GNAI2	1.40001	0.485434	0.00546889	0.0942488
SYNGR4	2.20578	1.14129	0.0054705	0.0942488
CAD	1.56549	0.64661	0.00548013	0.094304
LMBR1	0.589023	-0.763605	0.0054829	0.094304
CYTH1	1.52839	0.612012	0.00550411	0.0945895
PLXND1	1.99045	0.993095	0.00552983	0.0949518
CCDC15	1.5792	0.659194	0.00553664	0.0949892
MIB2	1.35077	0.433786	0.00555089	0.0951541
PPP1R8	1.2493	0.321114	0.00556508	0.0952856
SNHG6	1.58709	0.666388	0.00556785	0.0952856
STYK1	2.52262	1.33492	0.00558549	0.0954621
GLOD4	0.787884	-0.343946	0.00559206	0.0954621
C13orf16	2.26608	1.1802	0.00559385	0.0954621
MFSD8	0.696592	-0.521614	0.0056004	0.0954621
RRN3	0.738308	-0.437705	0.00560145	0.0954621
DTYMK	1.70696	0.771429	0.00560969	0.0955231
SNAI2	2.2078	1.14261	0.00561647	0.0955592
PIK3IP1	0.481522	-1.05433	0.0056291	0.0956948
TTC37	0.595903	-0.746851	0.00563615	0.0957352
PMP22	1.66967	0.739567	0.00566116	0.0959997
GALK2	0.672476	-0.572446	0.00566236	0.0959997
C20orf20	1.34283	0.425279	0.00566577	0.0959997
EIF1AY	9.29951	3.21715	0.00568309	0.0961345
RPL29	1.58268	0.662369	0.00569584	0.0961345
LOC283050	1.91992	0.941047	0.00569759	0.0961345
MAP1S	1.31584	0.395989	0.00569794	0.0961345
C17orf71	0.706738	-0.500753	0.00569936	0.0961345
FAM96A	0.691882	-0.531402	0.00570186	0.0961345
HAS1	3.91732	1.96987	0.0057174	0.0963172
AFF1	0.692816	-0.529456	0.00574443	0.0966932
GPR182	0.403945	-1.30777	0.00576189	0.0968548
CDC42	1.26549	0.339693	0.0057666	0.0968548
SCTR	0.29657	-1.75356	0.00577647	0.0968548
CD300LF	2.22388	1.15308	0.00577701	0.0968548
IQCG	0.678348	-0.559903	0.00577765	0.0968548
DAZAP1	1.29868	0.377044	0.0057913	0.0970043
TCEANC	0.642989	-0.637133	0.00580881	0.0971189
CHN2	0.38676	-1.37049	0.00581148	0.0971189
RFC5	1.51123	0.595728	0.00581495	0.0971189
DEAF1	1.48178	0.567328	0.00581709	0.0971189
RLTPR	2.66373	1.41345	0.00582584	0.0971858
FAM195B	1.37673	0.461247	0.0058574	0.0976328
FAM72D	2.18952	1.13061	0.00587237	0.0978029
TMX4	0.631323	-0.66355	0.00587832	0.0978226
LRRN3	0.224221	-2.15701	0.00589541	0.0980274
IPO9	1.31002	0.389584	0.00590158	0.0980504
PROK1	0.164638	-2.60263	0.00590977	0.0981069
SCARNA16	1.35618	0.439544	0.0059449	0.0985693
CMTM2	1.99506	0.996429	0.00594723	0.0985693
SNHG1	1.576	0.656269	0.00596008	0.0986979
FAM108A1	1.35868	0.442202	0.00596462	0.0986979
ALDH7A1	0.66234	-0.594355	0.00597111	0.0987256
ACSS3	0.195628	-2.35381	0.0059874	0.0987834
RPS4Y1	18.8931	4.23979	0.00598787	0.0987834
CNIH4	1.25299	0.325373	0.00598906	0.0987834
LIN9	1.61833	0.694503	0.00599518	0.0988048
TDG	1.36039	0.444023	0.00601233	0.0990079
TAF10	1.5707	0.651411	0.00605596	0.0996464
EEF1A2	0.284207	-1.81499	0.00608229	0.0999253
TTC12	0.584941	-0.773636	0.00608266	0.0999253
DZIP1	2.37358	1.24707	0.00611159	0.100203
C12orf32	1.39094	0.476062	0.00611446	0.100203
C7orf70	0.75534	-0.404802	0.00611451	0.100203
BAD	1.34196	0.424344	0.00612278	0.100203
COX8A	1.32228	0.403028	0.00612402	0.100203
ELP4	1.2851	0.36188	0.00613758	0.100217
C3orf18	0.566162	-0.820713	0.00614467	0.100217
DEXI	0.657114	-0.605785	0.00614488	0.100217
ACTG1	1.56732	0.648304	0.00614607	0.100217
DSN1	1.44671	0.532772	0.00614929	0.100217
CDCA7	3.88425	1.95764	0.00615465	0.100222
LHX6	2.02625	1.01881	0.0061594	0.100222
MAX	1.28161	0.357955	0.0061806	0.10028
CD81	1.5457	0.62826	0.00618336	0.10028
KIAA0922	1.52112	0.605137	0.00618388	0.10028
ACSBG1	0.435587	-1.19897	0.00618529	0.10028
SF3B14	1.32852	0.409824	0.00618742	0.10028
PPM1J	2.16129	1.11189	0.00619598	0.10034
ACSL4	0.518019	-0.948923	0.00621401	0.100552
ARIH1	0.800618	-0.320814	0.00622398	0.100623
SNRPF	1.55851	0.640165	0.00622822	0.100623
LIMD2	2.12349	1.08643	0.00624332	0.100788
ZNF408	1.33648	0.418437	0.00625379	0.100877
NTSR2	0.24205	-2.04662	0.00626727	0.101015
SLC26A1	0.499206	-1.00229	0.00628323	0.101193
CHM	0.63547	-0.654105	0.00629471	0.101298
CARD8	1.49128	0.576554	0.00635202	0.10214
RBM43	0.614416	-0.702713	0.00636484	0.10223
RIPK2	1.56027	0.641794	0.00636759	0.10223
LYPLA2	1.5485	0.630875	0.00637777	0.102308
HES7	2.23451	1.15996	0.00638238	0.102308
KLHDC10	0.535437	-0.90121	0.00639826	0.102482
GIT1	1.26472	0.338817	0.00640863	0.102568
C15orf52	0.391819	-1.35174	0.00644469	0.102767
ZNF12	0.761875	-0.392374	0.0064454	0.102767
SKIV2L2	0.774433	-0.368787	0.00644549	0.102767
EPN2	1.35761	0.441068	0.00644911	0.102767
TMEM201	1.50482	0.589591	0.00645031	0.102767
GORAB	0.69441	-0.52614	0.00645114	0.102767
ZYG11A	2.75101	1.45996	0.00645746	0.102788
AUP1	1.48934	0.574671	0.00646652	0.102852
SLC22A2	1.56758	0.648542	0.00647582	0.10292
CCNE1	2.0464	1.03309	0.00648741	0.103009
CHDH	0.232204	-2.10653	0.00649142	0.103009
USP9X	0.749478	-0.416042	0.00650321	0.103116
PAPD4	0.758927	-0.397967	0.00651768	0.103265
NRIP1	0.70585	-0.502566	0.0065269	0.103332
CLNS1A	1.26672	0.341102	0.00653281	0.103345
NLGN4Y	5.5492	2.47228	0.00654079	0.10336
SMCR8	0.672649	-0.572075	0.00654439	0.10336
BCL2L13	0.73817	-0.437974	0.00654887	0.10336
ARL15	0.61321	-0.705546	0.0065643	0.103524
SEC23B	0.632578	-0.660685	0.00659147	0.103812
SYNC	2.13158	1.09193	0.00659269	0.103812
ABI2	1.42354	0.509483	0.00660605	0.103892
MAST4	0.468088	-1.09515	0.00662458	0.103892
ETF1	0.725527	-0.462899	0.00662829	0.103892
ST7	0.744431	-0.425789	0.00662906	0.103892
MXD1	1.53315	0.616497	0.00663219	0.103892
FLJ37543	0.703153	-0.50809	0.00663317	0.103892
C3orf33	0.658749	-0.6022	0.00663522	0.103892
XPO4	0.716426	-0.481111	0.00663828	0.103892
RING1	1.33906	0.421225	0.00665227	0.103926
NRN1	3.03454	1.60148	0.00665789	0.103926
METTL12	1.72829	0.789343	0.00665923	0.103926
GALNT11	0.728242	-0.45751	0.00666072	0.103926
SLC5A5	1.90933	0.933066	0.00668627	0.10423
CRP	0.553998	-0.852048	0.00669446	0.10423
AP1AR	0.66498	-0.588617	0.00669595	0.10423
LDHD	0.324518	-1.62363	0.00670595	0.10423
MYPN	0.36645	-1.44831	0.00670731	0.10423
MTERF	0.748722	-0.417498	0.00671137	0.10423
HNRNPC	1.19965	0.262619	0.00672221	0.10423
MAN2C1	0.678826	-0.558885	0.00672586	0.10423
CENPE	2.09116	1.0643	0.00672597	0.10423
ZDHHC4	0.773249	-0.370996	0.00673931	0.104292
MOSPD3	0.663383	-0.592086	0.00674018	0.104292
BDNFOS	0.592521	-0.755061	0.00674612	0.104296
SUV39H2	1.45552	0.541539	0.00675189	0.104296
LARP7	0.758421	-0.398929	0.00675567	0.104296
ZNF90	1.88449	0.914175	0.00677607	0.104532
PTGR2	0.634765	-0.655705	0.00678505	0.104592
IQSEC1	0.636971	-0.6507	0.00680279	0.104663
NUTF2	1.57698	0.657167	0.00680581	0.104663
CACNB3	1.80943	0.855537	0.00680936	0.104663
EED	1.38072	0.465425	0.00681328	0.104663
MFRP	1.68795	0.755275	0.00681518	0.104663
ZNF581	1.53146	0.614904	0.00682357	0.104713
ITGA2	0.375565	-1.41287	0.00685244	0.105
SEC22B	0.743575	-0.427449	0.00685249	0.105
PRR3	1.41373	0.499509	0.00686522	0.105116
RNF6	0.680958	-0.554362	0.00689115	0.105355
WDR31	0.456079	-1.13265	0.00689388	0.105355
RPL30	1.48235	0.56789	0.00690231	0.105355
KIAA1609	1.39162	0.476767	0.00690552	0.105355
CARM1	1.30917	0.388652	0.00690652	0.105355
ZNF720	0.696729	-0.521331	0.00693726	0.105745
UCN	2.07884	1.05578	0.00696312	0.105957
CHPF	1.51121	0.595707	0.00696692	0.105957
ANK1	0.291074	-1.78054	0.00696848	0.105957
TMEM205	0.547198	-0.869865	0.00697178	0.105957
ZNF560	4.75263	2.24873	0.00700509	0.106309
ARF1	1.22903	0.297526	0.00701119	0.106309
KLF16	1.44455	0.530621	0.00701488	0.106309
NUBPL	0.703248	-0.507894	0.00701574	0.106309
CNKSR1	2.33987	1.22643	0.00704054	0.106591
CCNB1	2.09683	1.06821	0.00704474	0.106591
TRIM11	1.31756	0.39787	0.00705744	0.106695
CLDN16	0.484163	-1.04644	0.00706201	0.106695
TRUB1	0.674116	-0.568931	0.00707363	0.106792
FLJ35390	0.431532	-1.21246	0.00708949	0.10694
PVT1	1.93203	0.950115	0.00709827	0.10694
MCFD2	0.690679	-0.533912	0.00709907	0.10694
GAB2	1.6827	0.750777	0.00710974	0.107022
MTBP	1.765	0.819666	0.00713774	0.107365
PHIP	1.31812	0.398487	0.00714323	0.107368
GCKR	0.354241	-1.4972	0.00715034	0.107371
MARS2	0.633324	-0.658984	0.00715688	0.107371
TET3	1.54624	0.628767	0.00715968	0.107371
TPRXL	2.56143	1.35695	0.00716438	0.107371
PPM1M	1.7503	0.807601	0.00717031	0.107382
C16orf63	0.781746	-0.355229	0.00717593	0.107388
PYCR1	2.524	1.33571	0.00719413	0.107581
ZNF707	1.46335	0.54928	0.0072074	0.107662
SH3BGRL3	1.70124	0.76659	0.00721005	0.107662
PLEKHH1	0.470835	-1.08671	0.00722449	0.1078
ARPP19	0.765779	-0.385	0.00723635	0.107898
TECPR1	0.60738	-0.719329	0.00724847	0.108
HBP1	0.729374	-0.455269	0.00727061	0.108251
CEACAM8	1.60383	0.681524	0.00729577	0.108456
SYPL1	0.736239	-0.441754	0.00729646	0.108456
GPR172A	1.43058	0.516599	0.00730026	0.108456
TARS2	0.738377	-0.437571	0.00730626	0.108467
SCN8A	2.94802	1.55975	0.0073157	0.108529
ASB8	0.69251	-0.530093	0.00733796	0.10878
CTAGE5	0.664186	-0.59034	0.00734556	0.108814
PITPNC1	1.75674	0.812897	0.0073855	0.109272
TPM4	1.62269	0.698388	0.00738716	0.109272
YIF1B	1.32614	0.40723	0.00740243	0.109296
GPBP1	0.813604	-0.297601	0.00740417	0.109296
RND2	0.430485	-1.21597	0.00740472	0.109296
EPDR1	0.609372	-0.714604	0.00742225	0.109475
LYPD6	2.87408	1.5231	0.00744014	0.109475
C6orf48	1.57238	0.652953	0.00744689	0.109475
RPL38	1.44317	0.529236	0.00744953	0.109475
IVNS1ABP	1.42282	0.508758	0.00745031	0.109475
TTF2	0.706409	-0.501424	0.00745411	0.109475
SLC25A40	0.522111	-0.937572	0.00745425	0.109475
TMEM223	1.62617	0.701477	0.00746333	0.10953
FANCE	1.74502	0.803248	0.00748468	0.109765
ACCN4	1.92736	0.946624	0.00750048	0.109918
SFRS4	1.27247	0.347631	0.00753418	0.110326
TIMELESS	1.53436	0.61764	0.00753909	0.110326
FAM72B	1.99771	0.998349	0.0075832	0.110892
PPEF1	2.30414	1.20423	0.00762883	0.111448
CRABP1	2.01453	1.01044	0.00763961	0.111448
WDR34	1.63944	0.713201	0.00764221	0.111448
KIAA1524	1.91357	0.936267	0.00764296	0.111448
CTRC	2.01054	1.00758	0.0076829	0.111951
LDLRAD2	2.00648	1.00467	0.00770061	0.112016
STX5	1.29658	0.374712	0.00770534	0.112016
MAP3K5	0.560692	-0.83472	0.00770825	0.112016
KIAA0100	0.71276	-0.488513	0.00771213	0.112016
THOP1	1.37246	0.456767	0.00771469	0.112016
FOXF1	1.90269	0.928042	0.00772545	0.112029
PAPD5	0.66624	-0.585886	0.00772655	0.112029
RPL14	1.53061	0.614109	0.00773938	0.112057
PRRG2	1.83728	0.877574	0.00774372	0.112057
DLGAP5	3.70488	1.88943	0.00775062	0.112057
NPB	2.22807	1.15579	0.00775461	0.112057
PHC1	1.48898	0.574323	0.00776108	0.112057
PRDM13	2.00835	1.00601	0.0077639	0.112057
QPRT	0.371825	-1.4273	0.00777076	0.112057
PIK3R6	2.52084	1.3339	0.00777673	0.112057
ATP5A1	0.750549	-0.413982	0.00777802	0.112057
ZBTB2	1.32065	0.401245	0.00778312	0.112057
UTP15	0.713154	-0.487715	0.00780499	0.112156
AZGP1	0.41954	-1.25312	0.00780644	0.112156
C21orf58	1.67348	0.742849	0.00781066	0.112156
HIST2H2AB	1.34093	0.423237	0.00781187	0.112156
RBL2	0.673269	-0.570745	0.0078233	0.112242
PAQR5	0.330149	-1.59881	0.00783804	0.112374
GMIP	1.76976	0.823556	0.00785184	0.112494
PDK2	0.539002	-0.891638	0.00791179	0.113273
CCDC124	1.37166	0.45592	0.00792873	0.113291
DNAJC15	0.444008	-1.17134	0.00793413	0.113291
MAGED4	3.90813	1.96648	0.00793572	0.113291
VANGL2	2.40557	1.26638	0.00793939	0.113291
CAPG	2.46018	1.29877	0.0079422	0.113291
ATHL1	2.07945	1.0562	0.00794614	0.113291
ENOX2	0.609042	-0.715387	0.00796563	0.11349
TAF4B	0.64637	-0.629567	0.0079999	0.113871
RGS20	2.98884	1.57959	0.00800349	0.113871
POLR2G	1.43699	0.523047	0.00800967	0.113879
RPL23AP7	1.54321	0.625935	0.00804362	0.114248
C4orf34	0.641525	-0.640423	0.0080467	0.114248
RPS25	1.41052	0.496231	0.00806165	0.114381
SERPINA5	0.292165	-1.77515	0.00807357	0.114471
TOX2	2.08678	1.06128	0.00808505	0.114554
TMEM149	1.55068	0.632902	0.00812181	0.114959
ARHGAP8	3.65911	1.87149	0.00812483	0.114959
EPB41	0.657925	-0.604005	0.00814995	0.115149
NR1H4	0.237435	-2.07439	0.00815474	0.115149
SECISBP2	0.732838	-0.448434	0.00815512	0.115149
MGMT	1.86184	0.896728	0.00817504	0.115351
CYorf15B	6.62002	2.72684	0.00818158	0.115364
RPL31	1.42792	0.51392	0.00819276	0.115442
DNASE1L3	0.223051	-2.16455	0.00820678	0.11556
CMTM6	1.28509	0.361868	0.00822038	0.115598
USP9Y	7.48543	2.90409	0.00822073	0.115598
TSPAN14	1.33362	0.415349	0.00823692	0.115678
WEE1	1.63495	0.709243	0.00824019	0.115678
PHF7	0.590609	-0.759724	0.0082434	0.115678
SNHG12	1.67899	0.747595	0.00826113	0.115786
SNX18	0.626215	-0.675271	0.00826238	0.115786
TSGA14	0.677095	-0.562569	0.00827152	0.115821
CYorf15A	5.93146	2.56839	0.0082824	0.115821
EMILIN1	3.0543	1.61084	0.00828735	0.115821
SNRPA1	1.5093	0.59388	0.00828742	0.115821
PAR4	0.800539	-0.320956	0.00829419	0.115836
ARTN	2.3812	1.25169	0.00832676	0.116212
ING1	1.36503	0.448935	0.00835715	0.116557
ZFY	6.06169	2.59972	0.00837227	0.116688
MCM7	1.65428	0.726201	0.00837961	0.11669
PHOSPHO1	0.267267	-1.90365	0.00838377	0.11669
NOC4L	1.32508	0.406083	0.0084012	0.116826
MESDC1	1.49984	0.584812	0.00840494	0.116826
SUPT7L	1.23774	0.307713	0.00843101	0.117109
SCO1	0.753344	-0.40862	0.00844397	0.117181
HSPB11	1.56522	0.646362	0.00844765	0.117181
DNMT1	1.52694	0.610647	0.00845565	0.117213
PHAX	0.690274	-0.534759	0.00847459	0.117396
EXOSC4	1.5094	0.593976	0.00849328	0.117575
FBXL13	0.431189	-1.21361	0.00850272	0.117627
ZNF257	3.03297	1.60073	0.00851649	0.117738
CASP3	1.35413	0.437369	0.0085425	0.117948
PRH1	1.54154	0.624376	0.00854318	0.117948
EIF4ENIF1	0.765064	-0.386347	0.00857907	0.118363
TBC1D23	0.776103	-0.36568	0.00858965	0.118411
OST4	1.68615	0.753734	0.00859407	0.118411
MEI1	2.48668	1.31422	0.00860012	0.118415
CGN	0.359925	-1.47423	0.00862831	0.118723
PFKM	0.668597	-0.580791	0.00864447	0.118866
SLC2A9	0.418118	-1.25802	0.00866088	0.119012
NDRG2	0.49483	-1.015	0.00867186	0.119083
UBA1	0.7695	-0.378006	0.00868184	0.11914
ITM2C	2.09269	1.06536	0.00869286	0.119144
VEPH1	0.258565	-1.9514	0.00869379	0.119144
IL6ST	0.322173	-1.63409	0.00870536	0.119223
PAX6	1.73235	0.79273	0.00873946	0.11944
CCDC138	1.91448	0.936954	0.0087403	0.11944
LCMT2	0.721763	-0.470402	0.00874427	0.11944
EZH1	0.685298	-0.545198	0.00874786	0.11944
SLC4A5	1.72405	0.785802	0.00875028	0.11944
LIG1	1.5744	0.654799	0.0087567	0.119448
PTPN18	1.58166	0.661438	0.00878588	0.119708
DNA2	1.71493	0.778146	0.00878747	0.119708
RNF25	1.37051	0.454717	0.00879458	0.119725
2021-09-12	2.0092	1.00662	0.00880343	0.119757
TMEM187	0.619387	-0.691086	0.00880857	0.119757
CD248	2.35765	1.23735	0.00882015	0.119835
TBRG4	0.821392	-0.283857	0.00885875	0.12028
H3F3A	1.42676	0.512739	0.00887241	0.120385
TBX1	3.25515	1.70272	0.00889955	0.120674
UBE2Q2P1	0.515659	-0.95551	0.00891016	0.120686
PITPNM1	1.80138	0.849099	0.00891226	0.120686
LRRC24	2.37412	1.24739	0.00892372	0.120703
MEAF6	1.27071	0.345631	0.00892529	0.120703
DGKG	0.38063	-1.39354	0.00894271	0.120859
MIPEP	0.655908	-0.608434	0.008961	0.120973
TMUB1	1.42007	0.505964	0.00897174	0.120973
GPKOW	0.766826	-0.383028	0.00898125	0.120973
TMEM216	1.38694	0.471908	0.00898149	0.120973
ZNF75D	0.602617	-0.730686	0.00898569	0.120973
PPFIBP2	0.485457	-1.04259	0.00898651	0.120973
YJEFN3	2.27271	1.18441	0.00899566	0.121016
C20orf56	1.99155	0.993888	0.00901749	0.121166
ESM1	2.06317	1.04487	0.00901862	0.121166
TRMT2B	0.681853	-0.552467	0.00902911	0.121228
NCRNA00152	1.84616	0.884531	0.00903864	0.121276
FAM189B	1.63099	0.705746	0.00906254	0.121517
ARHGDIG	2.90648	1.53927	0.00908328	0.121716
GPR137	1.39222	0.477385	0.00912394	0.122154
WHAMM	0.780222	-0.358043	0.00912788	0.122154
HRSP12	0.577289	-0.792635	0.0091353	0.122173
SSNA1	1.41163	0.497361	0.00914623	0.12224
CAPZA1	1.29676	0.374917	0.00918186	0.122636
C7orf61	1.95586	0.967804	0.00918888	0.12265
KCTD15	1.95556	0.967585	0.00922027	0.122939
GFI1	2.0259	1.01857	0.00922251	0.122939
RWDD4A	0.720841	-0.472246	0.00923097	0.122972
PXDN	1.9603	0.971076	0.00925283	0.123137
DIAPH3	2.58642	1.37096	0.00925707	0.123137
KRTCAP2	1.51577	0.600055	0.00926143	0.123137
SFRS8	1.32445	0.405388	0.00928042	0.123161
WNT10B	3.79427	1.92382	0.00928077	0.123161
RNF128	0.223604	-2.16098	0.0092812	0.123161
BBS4	0.728536	-0.456927	0.00929255	0.123231
CWF19L1	1.21393	0.279684	0.00929905	0.123238
IDE	0.590618	-0.759703	0.00933138	0.123549
SULT1A1	0.364146	-1.45741	0.00933458	0.123549
BANF1	1.455	0.54102	0.00934648	0.123624
SUCLG2	0.742256	-0.430011	0.00935233	0.123624
FLJ42709	0.401145	-1.31781	0.00936668	0.123723
CCNF	1.84176	0.881082	0.00937188	0.123723
GFM1	0.715322	-0.483335	0.00937789	0.123723
TBC1D20	0.760331	-0.3953	0.00939874	0.123907
RAPGEF4	0.376445	-1.40949	0.0094039	0.123907
CPSF1	1.38637	0.471316	0.00941901	0.124026
DISP2	2.27056	1.18305	0.00943808	0.124041
SH3GL1	1.44329	0.529366	0.00943898	0.124041
FAM128B	1.50412	0.588915	0.00944206	0.124041
A4GALT	1.95865	0.969858	0.00944434	0.124041
BTNL3	0.668804	-0.580344	0.00946978	0.124295
ISCU	0.626083	-0.675575	0.00948498	0.124415
ODF2	1.41885	0.504717	0.00950828	0.124586
PROX1	0.384455	-1.37911	0.00951373	0.124586
ZNF787	1.35825	0.441749	0.00951621	0.124586
FEM1B	0.777515	-0.363057	0.00952488	0.12462
SLC35F2	2.29924	1.20116	0.00953422	0.124662
WDR81	0.670845	-0.575949	0.00955666	0.124859
EMP3	2.50484	1.32472	0.00956576	0.124859
ARRDC3	0.566919	-0.818786	0.00956749	0.124859
C11orf48	1.60897	0.686137	0.00959509	0.125064
TBC1D2B	0.68252	-0.551056	0.00959921	0.125064
MIIP	1.43845	0.524518	0.00960362	0.125064
CROCC	1.3293	0.410665	0.00961473	0.125064
SCMH1	1.3075	0.386813	0.00961602	0.125064
ZNF250	1.38751	0.472494	0.00962283	0.125064
JUN	1.74765	0.80542	0.00963176	0.125064
ZNF34	1.43717	0.523229	0.00963205	0.125064
LOC440905	0.475778	-1.07164	0.00966064	0.125327
PHGDH	2.94548	1.5585	0.00966961	0.125327
SRM	1.48168	0.567234	0.00968028	0.125327
RPSAP52	2.66925	1.41644	0.0096825	0.125327
ARID5A	1.69768	0.763566	0.00968286	0.125327
RPS27L	0.674157	-0.568843	0.00970908	0.125574
TAF6L	1.25438	0.326979	0.00971417	0.125574
ZNF492	2.70071	1.43334	0.00972991	0.125698
SART1	1.30764	0.386967	0.00977687	0.126134
RAB11B	1.23102	0.299853	0.00977795	0.126134
CAB39L	0.496028	-1.01151	0.00978319	0.126134
GRIK4	0.307035	-1.70352	0.00978826	0.126134
TIGD7	1.45388	0.539907	0.00981166	0.126289
STAT5B	0.723715	-0.466506	0.00981908	0.126289
LOC148709	2.1606	1.11144	0.00982662	0.126289
N6AMT1	0.676965	-0.562847	0.00983153	0.126289
COX15	0.802492	-0.31744	0.00984358	0.126289
TMEM160	1.51993	0.604003	0.00984604	0.126289
NSUN7	2.75407	1.46156	0.00985961	0.126289
TET1	1.8182	0.862514	0.00986056	0.126289
CKMT2	0.280204	-1.83545	0.00986474	0.126289
ESCO2	2.50699	1.32595	0.00986978	0.126289
RPS8	1.46062	0.546578	0.0098699	0.126289
ZWILCH	1.51008	0.594623	0.00987423	0.126289
DDX3Y	10.8577	3.44065	0.0098868	0.126371
ART4	0.455887	-1.13325	0.00989912	0.126427
NR2E1	2.34983	1.23256	0.00990354	0.126427
PCYT1B	0.198127	-2.3355	0.00993188	0.126694
CRISPLD1	2.8526	1.51228	0.00993679	0.126694
SHARPIN	1.44506	0.531127	0.00995134	0.126801
LARP1B	0.672191	-0.573057	0.00998912	0.127022
HIST3H2BB	0.520692	-0.941498	0.00999137	0.127022
BRMS1	1.33212	0.413723	0.00999394	0.127022
ACBD5	0.704133	-0.506079	0.00999504	0.127022
C6orf41	1.68037	0.748783	0.00999967	0.127022
C17orf100	1.34928	0.432189	0.0100585	0.127601
RELT	1.903	0.928276	0.0100586	0.127601
THY1	2.07706	1.05454	0.0100695	0.127601
C20orf135	1.51287	0.597284	0.0100819	0.127601
TRIM28	1.32108	0.401722	0.0100843	0.127601
DCPS	1.32291	0.403715	0.0100927	0.127601
PEPD	0.775795	-0.366254	0.0101004	0.127601
MND1	2.31874	1.21334	0.0101112	0.127601
HMGB3	2.13712	1.09567	0.0101186	0.127601
EPM2A	0.663082	-0.59274	0.0101236	0.127601
RUSC1	1.51454	0.598883	0.0101237	0.127601
TMEM61	0.327946	-1.60847	0.0101249	0.127601
EDF1	1.40259	0.488089	0.0101262	0.127601
KCNMA1	3.02004	1.59457	0.0101756	0.128069
UBE3A	0.797026	-0.327301	0.0101835	0.128069
PLIN5	0.340688	-1.55348	0.0101872	0.128069
MFSD6	0.468217	-1.09475	0.0101883	0.128069
C19orf23	1.57756	0.657695	0.0102049	0.128198
RHEBL1	1.87452	0.906524	0.0102378	0.128534
DDOST	1.26309	0.336953	0.0102521	0.128635
CUL3	0.825273	-0.277056	0.0102816	0.128925
TNS1	0.6126	-0.706983	0.010293	0.128944
POP5	1.42499	0.510947	0.0102957	0.128944
C15orf41	0.744117	-0.426399	0.01031	0.129044
C6orf59	1.6779	0.746659	0.010321	0.129104
BCO2	0.311388	-1.68322	0.0103287	0.129121
C1orf88	0.307977	-1.69911	0.0103422	0.129212
KLHL31	0.303807	-1.71877	0.0103531	0.129269
E2F8	2.63218	1.39626	0.0103651	0.129339
NKX2-4	1.32071	0.401319	0.0103917	0.129592
IFIT1	0.48444	-1.04561	0.0104081	0.129675
MUS81	1.29631	0.374408	0.0104109	0.129675
CAMKV	2.43945	1.28656	0.0104272	0.129799
DNAJA4	0.530457	-0.914691	0.0104396	0.129874
ZNF252	0.745825	-0.42309	0.0104641	0.130008
FBXO21	0.633827	-0.657838	0.0104715	0.130008
CSNK2B	1.36874	0.452848	0.0104795	0.130008
COG8	0.783185	-0.352575	0.0104802	0.130008
KNTC1	1.60745	0.684776	0.0104831	0.130008
ARHGEF1	1.361	0.44467	0.0104884	0.130008
FAM3D	1.55407	0.636048	0.0105054	0.13014
BCL2L2	0.688428	-0.538621	0.0105192	0.130198
DTWD2	0.627047	-0.673355	0.0105228	0.130198
DZIP3	0.702655	-0.509112	0.0105388	0.130318
GANC	0.755985	-0.403571	0.0105597	0.130497
LASP1	1.33163	0.413192	0.010571	0.130559
C14orf39	1.50377	0.588586	0.0105782	0.130568
C18orf55	0.7639	-0.388544	0.0105871	0.130599
UBA5	0.780968	-0.356665	0.0106012	0.130695
ANKRD13A	1.25985	0.333249	0.010636	0.131046
GYG2	3.64044	1.86411	0.0106497	0.131134
ZIC4	2.79621	1.48348	0.0106623	0.131134
ABLIM3	0.377098	-1.40699	0.0106624	0.131134
FAM172A	0.718241	-0.477461	0.0106723	0.131177
MAD2L2	1.57027	0.651015	0.0106871	0.131206
REM2	1.86673	0.90051	0.0106875	0.131206
SNX1	0.800932	-0.320248	0.0106964	0.131238
TMEM66	0.698308	-0.518065	0.0107247	0.131468
HHIPL2	3.16503	1.66222	0.0107281	0.131468
H3F3C	1.36974	0.453901	0.0107545	0.131667
YY1AP1	1.30114	0.379775	0.0107571	0.131667
SDC4	0.499743	-1.00074	0.0107839	0.131849
GTF2I	0.569614	-0.811944	0.0107849	0.131849
SLC40A1	0.380282	-1.39486	0.0107952	0.131897
KRI1	1.30487	0.383903	0.0108102	0.132002
NDUFAF4	0.722287	-0.469355	0.0108192	0.132033
ZNF193	1.50632	0.591029	0.0108307	0.132094
SLC18A3	2.79025	1.48039	0.0108594	0.132366
2021-09-02	1.32405	0.404952	0.0108724	0.132387
SLC7A2	2.32445	1.21689	0.0108848	0.132387
RACGAP1P	1.52698	0.610682	0.0108901	0.132387
PRNP	0.580929	-0.783566	0.0108974	0.132387
ZMYM4	1.26327	0.337162	0.0109002	0.132387
CDK13	0.782157	-0.35447	0.0109051	0.132387
HINT1	0.739733	-0.434924	0.0109071	0.132387
MMP25	1.95678	0.968479	0.0109128	0.132387
MTMR12	0.731796	-0.450487	0.0109278	0.132491
ARL16	1.45094	0.536993	0.0109449	0.13262
TMEM180	1.52661	0.610328	0.0109556	0.13267
SYMPK	1.37673	0.461246	0.0109671	0.132732
C8orf58	1.51896	0.603082	0.0109849	0.132864
TMEM63C	0.330497	-1.59729	0.010991	0.132864
PI4KA	0.673829	-0.569545	0.0110195	0.133
WNK4	1.83268	0.873952	0.0110271	0.133
TAS2R3	0.893262	-0.162845	0.0110287	0.133
HCFC2	0.763689	-0.388942	0.0110287	0.133
CCPG1	0.638866	-0.646415	0.0110347	0.133
TTC30A	0.672529	-0.572332	0.0110426	0.133017
SUMO1P1	1.53765	0.620727	0.0110518	0.133049
PMEPA1	2.01951	1.01401	0.0110606	0.133049
C6orf167	1.50479	0.589559	0.0110647	0.133049
COMMD1	1.39024	0.475334	0.0111067	0.133476
ZNF280D	0.755288	-0.404901	0.0111266	0.133636
C20orf177	0.599704	-0.737677	0.0111552	0.133902
MAOA	0.371658	-1.42795	0.0111674	0.133916
DNAJA3	0.728007	-0.457976	0.0111695	0.133916
LOC100133669	0.383397	-1.38309	0.0111878	0.134058
HIVEP3	1.60942	0.686541	0.0112098	0.134243
RND1	1.81342	0.858715	0.011217	0.134251
C6orf134	1.39628	0.481592	0.0112264	0.134284
ARPC4	1.3136	0.393527	0.0112335	0.134291
FIGNL2	2.05443	1.03874	0.0112457	0.134359
DOC2B	3.01244	1.59093	0.0112727	0.134595
MYO6	0.727687	-0.45861	0.0112874	0.134595
SPERT	1.42446	0.510418	0.0112892	0.134595
CXorf40A	0.719361	-0.475213	0.0112917	0.134595
GLRX	0.564109	-0.825955	0.0112997	0.134611
MMP1	4.73991	2.24486	0.0113097	0.13462
REEP6	0.446859	-1.16211	0.0113135	0.13462
SNRPC	1.35655	0.43994	0.0113351	0.134798
GEM	2.24	1.1635	0.0113507	0.13487
SECISBP2L	0.734356	-0.445449	0.0113543	0.13487
HIGD1B	2.15224	1.10584	0.0113798	0.13505
NHLRC4	0.443856	-1.17184	0.0113826	0.13505
SFMBT1	1.67028	0.740092	0.0114297	0.135477
MDH2	0.71751	-0.47893	0.0114318	0.135477
RPL28	1.56468	0.64587	0.0114712	0.135844
C19orf46	2.29184	1.1965	0.0114761	0.135844
ULBP2	2.33316	1.22229	0.0115011	0.136013
HDAC1	1.45935	0.545331	0.0115212	0.136013
DYDC2	1.60745	0.684772	0.0115269	0.136013
SERTAD3	1.48106	0.566632	0.0115297	0.136013
SOX4	1.71827	0.780956	0.011534	0.136013
FAM174A	0.671046	-0.575517	0.0115364	0.136013
TM7SF2	0.303161	-1.72185	0.0115452	0.136013
ZBTB7C	0.465491	-1.10318	0.0115507	0.136013
BRI3BP	1.63578	0.70998	0.0115548	0.136013
FBXO43	2.13033	1.09108	0.0115567	0.136013
UGT1A7	0.143456	-2.80132	0.0115887	0.13624
UNC5B	2.05675	1.04037	0.0116009	0.13624
C11orf54	0.692596	-0.529915	0.011602	0.13624
C7orf44	0.780923	-0.356748	0.0116025	0.13624
FXR2	0.7901	-0.339892	0.0116142	0.136299
RDH12	0.325505	-1.61925	0.011661	0.13677
RPL35A	1.41821	0.504075	0.0116715	0.136815
RPS20	1.52404	0.607899	0.0117055	0.137034
CXorf23	0.744406	-0.425838	0.0117088	0.137034
PRICKLE3	0.660835	-0.597638	0.0117102	0.137034
LOC645166	1.85656	0.892632	0.0117215	0.137087
DNALI1	0.339174	-1.5599	0.011731	0.13712
CCDC113	0.517292	-0.950949	0.011753	0.137239
GABARAPL1	0.605062	-0.724846	0.0117575	0.137239
ERI1	1.42155	0.507465	0.0117612	0.137239
ASB4	0.14662	-2.76985	0.0117933	0.137504
LOC100132707	0.584178	-0.775521	0.0117974	0.137504
RPN1	1.23772	0.307688	0.0118188	0.137639
DGUOK	1.49871	0.583721	0.0118224	0.137639
C18orf1	1.97522	0.982012	0.0118619	0.138021
VWA5A	0.556331	-0.845985	0.0118723	0.138064
NDFIP2	0.685614	-0.544532	0.0118801	0.138076
RPS24	1.47567	0.561373	0.0118912	0.13809
LIX1L	1.31163	0.391359	0.011899	0.13809
RPL13	1.48627	0.571701	0.0119015	0.13809
SFRS2IP	0.795957	-0.329237	0.01191	0.13811
SYTL1	2.39942	1.26269	0.011936	0.138186
SKP1	0.727981	-0.458028	0.0119396	0.138186
C14orf138	1.37001	0.454184	0.0119431	0.138186
ZYG11B	0.823907	-0.279447	0.0119473	0.138186
LOC255167	0.289771	-1.78701	0.0119502	0.138186
C3orf37	1.35323	0.436408	0.011964	0.138201
RPL22L1	1.64954	0.722062	0.011965	0.138201
POT1	0.730001	-0.454029	0.0119808	0.138306
PDLIM7	1.71509	0.778286	0.0120005	0.138455
LOC389332	2.2706	1.18307	0.012014	0.138533
RRM2	3.09685	1.6308	0.0120307	0.138541
UFM1	0.75794	-0.399844	0.0120327	0.138541
LDLRAD1	0.372829	-1.42341	0.012035	0.138541
SRXN1	0.655053	-0.610316	0.0120586	0.138735
NKX2-2	2.30111	1.20233	0.0120741	0.138767
COTL1	1.61933	0.6954	0.012075	0.138767
CD6	2.07941	1.05617	0.0121012	0.138991
ELOVL1	1.4838	0.569296	0.0121205	0.1391
PGAP1	1.36608	0.450039	0.0121243	0.1391
UGT1A6	0.159988	-2.64396	0.0121385	0.139185
LHX1	1.41191	0.497653	0.0121463	0.139197
VGLL2	2.90006	1.53608	0.0121819	0.139527
EFNB3	2.55854	1.35532	0.012189	0.13953
LYG1	1.99976	0.999828	0.0121982	0.139558
NCRNA00094	1.40307	0.48859	0.0122154	0.139677
RFESD	0.676214	-0.564449	0.0122622	0.140045
FNBP1	1.29238	0.370026	0.0122696	0.140045
CACNA1C	2.55615	1.35397	0.0122762	0.140045
CUL5	0.809607	-0.304706	0.0122838	0.140045
ZBTB8OS	1.40486	0.49043	0.0122986	0.140045
KIF7	2.6079	1.38289	0.0123002	0.140045
WHAMML1	0.698271	-0.518142	0.0123003	0.140045
GDPD1	0.513894	-0.960456	0.0123022	0.140045
RNF160	0.703718	-0.50693	0.0123385	0.14038
TNRC6B	0.782757	-0.353364	0.0123585	0.140455
PLA2G4C	0.516294	-0.953735	0.0123624	0.140455
CDH26	0.519328	-0.945281	0.0123656	0.140455
VASP	1.44705	0.533112	0.0123771	0.140465
SEMA3F	1.51916	0.60327	0.0123869	0.140465
WNT3A	1.82317	0.866452	0.0123871	0.140465
ERI3	1.23473	0.304195	0.012398	0.14051
SPRR2F	3.90133	1.96397	0.0124435	0.140949
LBX2	2.36328	1.24079	0.0124733	0.141208
C16orf55	1.56716	0.648153	0.0124949	0.141322
KLF15	0.396308	-1.3353	0.0125049	0.141322
MOGS	1.24781	0.319397	0.0125082	0.141322
HDHD3	0.423027	-1.24118	0.012511	0.141322
MEN1	1.4752	0.560914	0.0125344	0.141509
ZNF883	2.89342	1.53278	0.0125645	0.141771
TRAF7	1.27869	0.354661	0.0125886	0.141964
LANCL1	0.734269	-0.44562	0.0126127	0.142092
NUP107	1.36642	0.450404	0.0126137	0.142092
NARS	0.784049	-0.350984	0.0126266	0.142158
CHRNE	2.05787	1.04115	0.0126391	0.142173
ITPKC	1.27412	0.349497	0.0126418	0.142173
RBM47	0.648281	-0.625308	0.0126624	0.142293
KIAA1012	0.751833	-0.411517	0.0126663	0.142293
DCAF7	1.32515	0.406159	0.0126771	0.142336
FOLH1	3.39042	1.76147	0.0127011	0.142528
PARD3B	0.492954	-1.02048	0.0127213	0.142676
UTY	6.35033	2.66683	0.01275	0.142855
FAM92B	1.63221	0.706824	0.0127541	0.142855
TRIM2	0.584471	-0.774797	0.0127648	0.142855
PTPLAD1	0.665409	-0.587687	0.0127651	0.142855
NUDT7	0.461936	-1.11424	0.012782	0.142965
ANGPTL2	2.23131	1.15789	0.0127965	0.142965
DNAH14	2.72491	1.44621	0.0127966	0.142965
DUSP5P	2.42265	1.27659	0.0128078	0.142965
BCL7C	1.46935	0.555174	0.0128098	0.142965
SLC38A7	0.575658	-0.796715	0.0128366	0.143116
NECAB2	3.30385	1.72415	0.0128373	0.143116
CES2	0.559621	-0.837478	0.0128568	0.143218
GJA3	2.35479	1.2356	0.0128604	0.143218
BAALC	0.414305	-1.27124	0.0128999	0.143579
NR2F1	0.411389	-1.28142	0.0129301	0.143838
FBN1	1.79455	0.843619	0.0129866	0.144388
BEAN	2.64309	1.40222	0.0130024	0.144486
BBS12	0.597694	-0.74252	0.0130228	0.144633
DRD2	2.31418	1.2105	0.0130416	0.144764
CBR4	0.678856	-0.558823	0.0130602	0.144892
ZSCAN29	0.749825	-0.415374	0.0130708	0.144931
AAGAB	0.756916	-0.401796	0.0131106	0.145268
RAMP2	1.64001	0.7137	0.0131154	0.145268
TSTA3	1.48104	0.566614	0.0131348	0.145339
RFC4	1.50378	0.588595	0.0131359	0.145339
MRPL17	1.3876	0.472597	0.0131726	0.145666
SLC2A4RG	1.50961	0.594181	0.0132026	0.145919
HDGFRP2	1.28883	0.366066	0.0132233	0.146069
C9orf153	1.54011	0.623032	0.0132316	0.146082
ITPR2	0.6542	-0.612196	0.013244	0.14614
KHDRBS1	1.26196	0.335661	0.0132526	0.146156
BRIP1	1.89841	0.924791	0.0132685	0.146253
ZNF93	1.69186	0.758607	0.0132951	0.146468
ZFP42	1.51171	0.596177	0.0133073	0.146507
CORT	1.65445	0.726349	0.0133129	0.146507
TMEM186	0.775504	-0.366794	0.0133362	0.146684
SNAP23	0.791674	-0.337022	0.0133618	0.146855
DCHS1	1.60087	0.678852	0.0133721	0.146855
AQP7	0.451768	-1.14634	0.0133733	0.146855
GLI4	1.61473	0.691297	0.013391	0.146921
HEPH	0.346832	-1.52769	0.0133936	0.146921
MED27	1.41961	0.50549	0.0134008	0.146922
TFG	1.22142	0.288564	0.0134128	0.146969
B3GALT6	1.35223	0.435335	0.0134229	0.146969
NCRNA00230B	1.94357	0.958706	0.0134266	0.146969
HSPH1	0.65977	-0.599966	0.0134415	0.147053
LILRA3	2.07519	1.05325	0.0134676	0.147202
CHAF1A	1.44547	0.531538	0.013477	0.147202
KIAA0895	0.507367	-0.978897	0.0134806	0.147202
TSPAN9	1.62349	0.699094	0.0134838	0.147202
LOC441869	2.13275	1.09271	0.0134917	0.14721
RBM4	1.29009	0.367474	0.0135151	0.147387
HERPUD1	0.677528	-0.561647	0.0135413	0.147462
ALDH3A2	0.659974	-0.599519	0.0135435	0.147462
PCDHB9	2.43708	1.28515	0.0135436	0.147462
NPR2	0.351522	-1.50831	0.0135718	0.147614
TRIM47	1.80172	0.849372	0.0135729	0.147614
C21orf91	0.741281	-0.431907	0.0135831	0.147614
KCNRG	0.678871	-0.55879	0.0136098	0.147614
FLJ23867	1.75286	0.80971	0.0136113	0.147614
SFPQ	1.22641	0.294438	0.0136113	0.147614
VCX	1.52149	0.605485	0.0136127	0.147614
LYPLA2P1	1.47706	0.562726	0.0136215	0.147614
EBF3	2.34651	1.23051	0.0136269	0.147614
TLR3	0.577209	-0.792833	0.0136346	0.147614
CLK2	1.42578	0.511747	0.0136367	0.147614
CD70	2.64065	1.40089	0.0136666	0.147827
TYRP1	2.60827	1.38309	0.0136709	0.147827
RPL8	1.45641	0.54242	0.0136975	0.147956
TRAPPC10	0.757765	-0.400177	0.0137055	0.147956
C9orf86	1.28194	0.358332	0.0137135	0.147956
POLD3	1.38871	0.473744	0.0137148	0.147956
MAPK11	1.80257	0.850055	0.0137307	0.147956
BCCIP	1.27488	0.350366	0.0137328	0.147956
ACBD4	0.629793	-0.667051	0.0137352	0.147956
SOCS6	0.751848	-0.411486	0.0137406	0.147956
S100PBP	1.30022	0.37875	0.0137605	0.148016
CD36	0.413286	-1.27479	0.0137605	0.148016
EGFR	0.509407	-0.973109	0.013778	0.148126
FBXO38	0.781171	-0.35629	0.0137933	0.14814
SUSD5	2.67004	1.41686	0.0137983	0.14814
C1orf123	1.29627	0.37437	0.013801	0.14814
FAM47E	0.518562	-0.94741	0.0138172	0.148236
LOC641298	0.475039	-1.07388	0.0138454	0.148409
CDC7	1.75981	0.815422	0.0138518	0.148409
NEU3	0.490353	-1.02811	0.013855	0.148409
FGF8	1.51246	0.596894	0.0138911	0.14856
CLINT1	0.693734	-0.527545	0.0138929	0.14856
SLC23A2	0.57017	-0.810537	0.0138985	0.14856
CRYL1	0.635756	-0.653454	0.0139004	0.14856
C4orf21	1.6828	0.75086	0.0139137	0.14856
CAT	0.606368	-0.721734	0.0139138	0.14856
PYDC1	0.478911	-1.06217	0.0139198	0.14856
TPK1	0.561582	-0.832431	0.0139627	0.148877
C1orf96	1.43512	0.521172	0.0139697	0.148877
C2orf68	1.36743	0.451469	0.0139713	0.148877
MSH3	0.784836	-0.349537	0.0139963	0.149011
EMX2	3.22135	1.68767	0.0140077	0.149011
PAPSS2	0.39036	-1.35712	0.0140078	0.149011
XPNPEP3	0.725839	-0.462279	0.014013	0.149011
NFATC1	1.69735	0.763287	0.014021	0.149019
NRG2	0.459185	-1.12285	0.0140969	0.149562
OPA1	0.772813	-0.371809	0.0140975	0.149562
C1orf54	1.69023	0.757218	0.0141034	0.149562
TM6SF2	2.30277	1.20337	0.0141077	0.149562
SLC22A18AS	2.07656	1.0542	0.01411	0.149562
CADM4	0.48332	-1.04895	0.0141205	0.149562
FZD10	2.41403	1.27144	0.0141231	0.149562
LRPPRC	0.792116	-0.336216	0.0141609	0.149827
WDHD1	1.69015	0.757149	0.0141628	0.149827
ZNF330	0.755438	-0.404615	0.0142363	0.150396
ZBTB12	1.49893	0.583933	0.01424	0.150396
FAM64A	2.32609	1.21791	0.0142452	0.150396
NR1I3	1.64706	0.719894	0.0142458	0.150396
FASTKD5	0.749509	-0.415982	0.0142545	0.15041
C9orf40	1.55213	0.634252	0.0142902	0.150709
HES6	2.44113	1.28755	0.0143594	0.151325
NT5DC1	0.673124	-0.571056	0.0143634	0.151325
PTDSS1	1.27817	0.354085	0.0143843	0.151467
COG2	0.736611	-0.441025	0.0144178	0.151641
COQ10A	0.593348	-0.75305	0.0144217	0.151641
PRKG1	0.366685	-1.44739	0.014423	0.151641
EXOC4	0.781543	-0.355603	0.0144457	0.151802
EFTUD1	0.641796	-0.639814	0.0144598	0.151873
VGLL1	1.2187	0.285344	0.0144718	0.151908
TMEM144	0.585583	-0.772054	0.014478	0.151908
CNOT4	0.779198	-0.359939	0.0144922	0.151979
ZIC5	2.75983	1.46458	0.014528	0.152277
PAX1	3.56845	1.8353	0.0145403	0.152328
TADA1	0.810543	-0.303039	0.0145786	0.152399
USP37	1.32125	0.401907	0.0145816	0.152399
SEMA4A	2.14318	1.09976	0.0145948	0.152399
ERAP1	0.678453	-0.559679	0.014596	0.152399
ABCA8	0.375743	-1.41218	0.0145986	0.152399
HINT3	0.678325	-0.559952	0.0146016	0.152399
PIGP	0.65903	-0.601585	0.0146063	0.152399
ZDHHC5	1.22845	0.296834	0.0146066	0.152399
TRPC6	2.55687	1.35438	0.014616	0.15242
PACSIN3	2.01891	1.01358	0.0146683	0.152811
MRM1	0.68969	-0.53598	0.0146684	0.152811
EFHA1	0.745258	-0.424189	0.0146933	0.152989
SYNPO	0.606321	-0.721845	0.0147005	0.152989
MGC14436	0.429451	-1.21943	0.0147161	0.153
ATP2A1	2.22312	1.15259	0.0147164	0.153
DEPDC6	0.530792	-0.913781	0.0147375	0.153072
ARAF	0.764067	-0.388229	0.0147383	0.153072
HNRNPA1L2	1.31908	0.399535	0.0147517	0.153124
COL9A2	4.95712	2.3095	0.0147583	0.153124
C2orf69	0.799191	-0.323389	0.0147728	0.153124
RPS13	1.35988	0.443475	0.0147949	0.153124
AARS2	1.27497	0.350467	0.0147963	0.153124
LAMC1	1.38899	0.474037	0.0148063	0.153124
FAP	3.50402	1.80901	0.0148128	0.153124
KIAA1324L	0.385448	-1.37539	0.0148248	0.153124
ASAP2	1.51533	0.59963	0.0148312	0.153124
TMEM194A	1.45374	0.539772	0.0148331	0.153124
DDO	0.494178	-1.0169	0.0148391	0.153124
PRKY	3.71989	1.89526	0.0148413	0.153124
DLGAP1	0.351049	-1.51026	0.014852	0.153124
LOC441208	0.643862	-0.635176	0.0148624	0.153124
LOC646982	0.648563	-0.624681	0.0148747	0.153124
C8ORFK29	2.11057	1.07763	0.014881	0.153124
LOC388692	1.77089	0.824471	0.0148868	0.153124
RC3H1	0.832026	-0.265299	0.0148906	0.153124
LIAS	0.71062	-0.492851	0.0148922	0.153124
SNURF	0.270238	-1.8877	0.0148927	0.153124
LOC728643	1.38798	0.472982	0.0149608	0.153747
SAFB	1.19153	0.25281	0.0149875	0.153908
EHMT2	1.33603	0.417951	0.0149915	0.153908
HNRNPUL1	1.29722	0.375422	0.0150289	0.154169
[truncated: 1,753 more rows]

## Sheet: BLCA
Table2. Differential expression genes related CDKN2A in TCGA-BLCA
id	fc	log2fc	pvalue	padj
CDKN2A	338.186	8.40167	1.38124e-170	2.83181e-166
C9orf53	4.91789	2.29804	2.47941e-75	2.54164e-71
CDKN2B	24.6864	4.62564	2.48577e-69	1.69878e-65
CDKN2BAS	16.038	4.00342	7.24582e-59	3.71384e-55
MTAP	16.1398	4.01255	1.68847e-48	6.92342e-45
WDR34	2.27192	1.18391	3.64283e-27	1.24476e-23
C13orf27	1.88974	0.918187	4.13108e-25	1.20993e-21
C9orf40	2.33409	1.22286	4.19147e-24	1.07417e-20
FANCC	1.94652	0.960897	3.79217e-23	7.82062e-20
LOC554202	11.0088	3.46059	3.81456e-23	7.82062e-20
PSIP1	2.31502	1.21102	1.77935e-22	3.31639e-19
DONSON	1.86829	0.901721	3.74391e-22	6.39646e-19
LOC283267	2.02289	1.01642	3.13172e-21	4.93897e-18
E2F1	2.33326	1.22234	5.38531e-21	7.88641e-18
CCNE2	2.51219	1.32895	7.00651e-21	9.5765e-18
RHEBL1	2.59093	1.37347	1.18877e-20	1.52326e-17
MESP1	6.2411	2.6418	1.57844e-20	1.83222e-17
SMS	1.80547	0.852378	1.60862e-20	1.83222e-17
TCF19	2.11589	1.08127	1.6987e-20	1.83299e-17
RB1	0.411353	-1.28155	3.14448e-20	3.22341e-17
IFNE	5.73302	2.51929	6.05088e-20	5.90739e-17
MELK	2.23897	1.16283	2.19281e-19	2.0435e-16
WDR76	1.91028	0.933782	6.51481e-19	5.80724e-16
ELAVL2	7.02969	2.81346	1.8227e-18	1.55704e-15
CHAF1B	1.78921	0.839319	1.96304e-18	1.5656e-15
MCM6	1.67011	0.739945	1.98544e-18	1.5656e-15
FANCG	1.72071	0.783004	2.26835e-18	1.72244e-15
CIZ1	1.4875	0.572894	3.09304e-18	2.26476e-15
STRBP	1.6973	0.763241	3.85756e-18	2.72716e-15
RFC4	1.68056	0.748938	4.80103e-18	3.28102e-15
DSN1	1.55997	0.641516	6.38462e-18	4.2225e-15
ACADSB	0.443808	-1.17199	6.75e-18	4.32464e-15
COBRA1	1.51165	0.596123	1.07484e-17	6.62987e-15
MCM2	1.80726	0.8538	1.09948e-17	6.62987e-15
PHF19	2.0932	1.06571	1.62363e-17	9.51077e-15
TPM3	1.44206	0.528131	1.6793e-17	9.56364e-15
USP1	1.71482	0.778055	2.39293e-17	1.32594e-14
DAND5	2.41791	1.27376	2.76385e-17	1.49117e-14
NDC80	1.90099	0.926749	4.48267e-17	2.32367e-14
HMGN2	1.55284	0.634908	4.53355e-17	2.32367e-14
KIAA0564	0.53843	-0.89317	4.75927e-17	2.37987e-14
H2AFV	1.39556	0.480846	6.78074e-17	3.30997e-14
CCND1	0.307091	-1.70326	7.24873e-17	3.45613e-14
DEK	1.76619	0.820641	1.60713e-16	7.48849e-14
TCP11L1	2.09743	1.06862	1.76118e-16	8.02392e-14
ZNF367	2.0046	1.00331	2.19072e-16	9.76393e-14
EXOSC3	1.58317	0.662817	2.50879e-16	1.09437e-13
CAPNS2	0.0923906	-3.43611	3.71251e-16	1.58571e-13
EZH2	1.7563	0.812543	4.48688e-16	1.87735e-13
CEP78	1.55722	0.638977	5.64833e-16	2.31604e-13
RTN3	1.60857	0.68578	6.97153e-16	2.80256e-13
PRIM1	1.77056	0.824207	8.3918e-16	3.30863e-13
HDAC10	0.603423	-0.728759	8.61429e-16	3.33227e-13
ZNF385A	0.4208	-1.24879	9.86344e-16	3.69742e-13
KIAA0895	2.40631	1.26682	9.91894e-16	3.69742e-13
TYMS	1.96224	0.9725	1.29116e-15	4.72703e-13
CTSL2	4.50639	2.17197	2.68385e-15	9.53063e-13
TRAF2	1.56591	0.647001	2.69621e-15	9.53063e-13
TMEM203	1.38899	0.474033	3.51217e-15	1.22045e-12
VPS36	0.607518	-0.719002	3.59996e-15	1.23011e-12
CDK5RAP2	1.55036	0.632602	4.01636e-15	1.34989e-12
CENPA	1.8433	0.882291	4.76368e-15	1.57524e-12
C15orf21	1.72645	0.787809	5.46208e-15	1.77752e-12
TOMM5	1.56071	0.642205	5.56782e-15	1.78362e-12
PCNA	1.56177	0.643182	6.04914e-15	1.90799e-12
UGT1A10	0.0461079	-4.43884	7.95898e-15	2.47235e-12
UBAC1	1.5481	0.630502	9.42726e-15	2.88474e-12
SPERT	0.293575	-1.7682	9.98916e-15	3.01173e-12
KLF11	1.73132	0.791869	1.26886e-14	3.77016e-12
KLHL9	2.64865	1.40526	1.35152e-14	3.95841e-12
TOP3A	1.5108	0.595312	1.8355e-14	5.3002e-12
C1QL1	4.19949	2.07022	2.22344e-14	6.33124e-12
CBR4	0.590757	-0.759364	2.36381e-14	6.63875e-12
POLA1	1.5827	0.662384	2.40347e-14	6.65891e-12
FEN1	1.63384	0.70827	2.59287e-14	7.08787e-12
MSH2	1.51475	0.599081	2.63618e-14	7.09406e-12
CCNE1	1.97777	0.983872	2.66434e-14	7.09406e-12
RMI1	1.66265	0.73348	2.85521e-14	7.50481e-12
EXOSC2	1.46283	0.548761	2.93225e-14	7.60975e-12
SHMT1	1.84476	0.883431	2.9714e-14	7.61495e-12
CCDC109B	2.03264	1.02335	3.09664e-14	7.83794e-12
ANP32B	1.50655	0.591251	4.37842e-14	1.09471e-11
CLCA4	0.0627833	-3.99348	4.54343e-14	1.12228e-11
KIFC1	1.67837	0.747061	5.15402e-14	1.25795e-11
LDB1	0.672327	-0.572766	5.42395e-14	1.30826e-11
CHEK1	1.65636	0.728017	6.1777e-14	1.45636e-11
PRPF4	1.44502	0.531089	6.19884e-14	1.45636e-11
MESP2	3.92929	1.97427	6.2511e-14	1.45636e-11
HTR1D	4.05698	2.02041	6.32851e-14	1.45783e-11
DNAJC9	1.44497	0.531043	6.6156e-14	1.50703e-11
DNMT1	1.55356	0.63558	7.26365e-14	1.63648e-11
SLC39A1	1.35905	0.442595	9.23948e-14	2.059e-11
SEMA6A	0.240919	-2.05338	9.80582e-14	2.16171e-11
GRHPR	1.50586	0.590587	1.07351e-13	2.34139e-11
ST13	0.739441	-0.435492	1.15126e-13	2.48454e-11
MED22	1.51624	0.600495	1.34039e-13	2.86258e-11
AKR1C2	0.120494	-3.05297	1.43108e-13	3.02474e-11
TP53TG1	0.524269	-0.931621	1.51979e-13	3.17946e-11
HIST1H2BJ	2.64056	1.40084	1.7105e-13	3.5423e-11
TTF1	1.3768	0.461319	1.73791e-13	3.56307e-11
MVK	0.636549	-0.651657	1.75592e-13	3.56435e-11
TPX2	1.77102	0.824579	1.77956e-13	3.57691e-11
SFRS2B	0.708631	-0.496894	1.81327e-13	3.60929e-11
FAM111B	1.9519	0.964876	1.9502e-13	3.83438e-11
MCART1	1.53293	0.616293	1.96376e-13	3.83438e-11
SLC25A25	1.59122	0.670134	2.40031e-13	4.64257e-11
MRPL9	1.39008	0.475167	2.46914e-13	4.73106e-11
HOXC4	0.240635	-2.05508	2.54856e-13	4.83802e-11
ZMYND19	1.47061	0.556413	2.71423e-13	5.10524e-11
STIL	1.66159	0.732561	2.79511e-13	5.20957e-11
PGAP1	0.516421	-0.953381	3.1454e-13	5.80965e-11
SMAD3	0.507793	-0.977687	3.5326e-13	6.46656e-11
DENND1A	1.49867	0.583681	4.77411e-13	8.65907e-11
FBLN7	2.89251	1.53232	4.81482e-13	8.65907e-11
RCL1	1.59324	0.671966	5.04597e-13	8.99586e-11
KIAA0020	1.57593	0.656204	5.54001e-13	9.79149e-11
C9orf109	2.50626	1.32553	6.54923e-13	1.13825e-10
ARPC5L	1.46943	0.555253	6.55125e-13	1.13825e-10
C9orf86	1.44933	0.535384	6.65808e-13	1.14709e-10
MFI2	4.96298	2.31121	6.80423e-13	1.1625e-10
C9orf100	1.71274	0.776309	6.8884e-13	1.16716e-10
NT5M	2.8471	1.50949	6.98222e-13	1.17336e-10
C9orf110	2.69736	1.43155	7.16213e-13	1.19381e-10
LOC440925	3.23305	1.6929	7.31961e-13	1.21022e-10
FABP6	0.180792	-2.4676	7.74588e-13	1.27045e-10
CKS2	1.65522	0.727027	8.35037e-13	1.35873e-10
ANXA10	0.0673228	-3.89276	8.58335e-13	1.37702e-10
CCHCR1	1.58234	0.662061	8.59711e-13	1.37702e-10
GPKOW	1.30811	0.387479	9.83565e-13	1.56318e-10
PRTFDC1	2.57945	1.36706	1.00505e-12	1.58504e-10
POLE3	1.44949	0.535549	1.03571e-12	1.62093e-10
TOR1A	1.35775	0.441217	1.07479e-12	1.66934e-10
ARRB2	1.71551	0.77864	1.27473e-12	1.965e-10
TMEM106C	1.56681	0.647835	1.29329e-12	1.97874e-10
STMN1	1.68099	0.749308	1.30817e-12	1.98668e-10
MECOM	0.354927	-1.4944	1.32329e-12	1.99485e-10
NCBP1	1.41081	0.496519	1.46413e-12	2.19107e-10
KIF24	1.74822	0.805886	1.50739e-12	2.23946e-10
NUP188	1.50138	0.586286	1.56209e-12	2.30402e-10
MSH6	1.49117	0.576442	1.63634e-12	2.39631e-10
DCLRE1B	1.45743	0.543422	2.09986e-12	3.05329e-10
KHDC1	2.73123	1.44955	2.34914e-12	3.3917e-10
PRIM2	1.41818	0.504036	2.50961e-12	3.59805e-10
CTTN	0.622012	-0.684985	2.58162e-12	3.67558e-10
ADAD2	0.379979	-1.39601	2.64726e-12	3.74305e-10
DNAJA2	0.762085	-0.391977	2.8437e-12	3.99326e-10
RFK	1.58974	0.668788	3.1219e-12	4.3541e-10
RAD18	1.55588	0.637731	3.19687e-12	4.42852e-10
HSBP1	0.730497	-0.453049	3.90792e-12	5.37719e-10
UCK1	1.40023	0.485661	3.96262e-12	5.40626e-10
ANAPC2	1.33386	0.41561	3.98178e-12	5.40626e-10
HOXD4	0.3274	-1.61087	4.13762e-12	5.58089e-10
DQX1	0.245967	-2.02346	4.49515e-12	6.0235e-10
NADSYN1	0.565349	-0.822787	4.56063e-12	6.07156e-10
RLTPR	3.12667	1.64463	4.64768e-12	6.14754e-10
DOLPP1	1.40243	0.487933	4.74677e-12	6.23835e-10
FSD1L	2.57458	1.36434	4.9014e-12	6.40054e-10
CDKN3	1.76711	0.821396	4.93502e-12	6.40366e-10
HIST2H4A	2.25288	1.17177	5.60982e-12	7.23349e-10
PTPDC1	1.49914	0.584137	5.75749e-12	7.37751e-10
GPRIN1	2.28536	1.19242	6.81359e-12	8.67654e-10
SLMO1	2.60088	1.379	6.92848e-12	8.76838e-10
ABCC5	0.494256	-1.01667	7.25096e-12	9.1202e-10
SNX8	1.55516	0.637067	7.37002e-12	9.21343e-10
GSG2	1.80253	0.850023	7.42349e-12	9.22402e-10
MAGEA9B	0.0714867	-3.80618	7.58298e-12	9.36544e-10
C9orf64	1.49863	0.58364	7.80641e-12	9.58365e-10
GPX2	0.0846027	-3.56315	8.14873e-12	9.94437e-10
TNKS2	0.70414	-0.506066	8.26146e-12	1.00223e-09
CNTLN	2.66854	1.41605	8.66928e-12	1.04552e-09
SET	1.34897	0.431862	8.87961e-12	1.06388e-09
KIF4A	1.71912	0.781673	8.92538e-12	1.06388e-09
ASF1B	1.52695	0.610656	9.38253e-12	1.11191e-09
PAQR4	1.6961	0.762225	1.00408e-11	1.18143e-09
COMT	0.574506	-0.799605	1.00844e-11	1.18143e-09
PXMP2	1.59268	0.67146	1.09063e-11	1.27047e-09
ZMIZ1	0.639809	-0.644288	1.20731e-11	1.39843e-09
AKAP5	1.95461	0.966884	1.21889e-11	1.40391e-09
POLR1E	1.52144	0.60544	1.23587e-11	1.41551e-09
DHDPSL	0.337838	-1.5656	1.35003e-11	1.53768e-09
LONP2	0.705608	-0.503062	1.36282e-11	1.54367e-09
LPA	0.314083	-1.67078	1.4129e-11	1.59161e-09
SMC2	1.63379	0.708223	1.53235e-11	1.71673e-09
FGFR3	0.17434	-2.52003	1.56969e-11	1.749e-09
KCNG3	2.57947	1.36708	1.61103e-11	1.78537e-09
DMRTA1	4.17795	2.0628	1.62904e-11	1.79562e-09
CARHSP1	1.67482	0.744006	1.6798e-11	1.84167e-09
CLCN3	0.587954	-0.766224	1.71074e-11	1.86561e-09
TBCK	0.65029	-0.620846	1.78244e-11	1.93352e-09
F8A1	1.48974	0.575061	1.85084e-11	1.99715e-09
TUBGCP6	0.679864	-0.556682	1.89646e-11	2.03567e-09
ENHO	3.07349	1.61988	1.92097e-11	2.04468e-09
PSMC3IP	1.5621	0.643484	1.9248e-11	2.04468e-09
HABP4	1.71075	0.774626	2.11794e-11	2.23825e-09
RPA3	1.45878	0.544764	2.50765e-11	2.63651e-09
MTHFD2	1.73223	0.792629	2.58231e-11	2.70115e-09
LONRF1	0.595456	-0.747934	2.72732e-11	2.83835e-09
LHX2	3.23761	1.69493	2.88671e-11	2.98905e-09
TRIM36	2.6263	1.39303	2.98295e-11	3.07318e-09
C10orf47	2.09792	1.06896	3.01498e-11	3.09065e-09
FAM64A	1.8584	0.894059	3.13712e-11	3.18666e-09
FAM184A	2.59276	1.37449	3.14843e-11	3.18666e-09
CD274	3.394	1.76298	3.1708e-11	3.18666e-09
ATF7IP2	0.44568	-1.16592	3.1708e-11	3.18666e-09
PLAA	1.56129	0.642741	3.19896e-11	3.19927e-09
NDUFB6	1.43764	0.523706	3.22251e-11	3.20718e-09
DNM1	2.5651	1.35902	3.29309e-11	3.26159e-09
POLE2	1.70728	0.771702	3.43992e-11	3.39064e-09
RELL1	1.48957	0.574896	3.47444e-11	3.40827e-09
C19orf57	2.18322	1.12646	3.52902e-11	3.44533e-09
AK1	1.75668	0.81285	3.66003e-11	3.5563e-09
SEMA4B	0.473103	-1.07977	3.82146e-11	3.69564e-09
TRIM13	0.586246	-0.770422	3.83955e-11	3.6957e-09
ZNF232	1.55533	0.637221	3.91648e-11	3.75214e-09
RBBP7	1.34717	0.429928	3.99393e-11	3.80854e-09
CDK5R1	2.08615	1.06085	4.08737e-11	3.8796e-09
RNASEH2A	1.44391	0.529982	4.25244e-11	4.00141e-09
NMNAT2	3.28291	1.71498	4.25474e-11	4.00141e-09
RASGRF1	3.22122	1.68761	4.35089e-11	4.07315e-09
MORC4	1.50734	0.592005	4.53506e-11	4.22626e-09
FRMD5	2.71025	1.43843	4.62734e-11	4.29275e-09
PNMA1	1.89668	0.923477	4.822e-11	4.45318e-09
FBXO5	1.55435	0.636316	5.1503e-11	4.73505e-09
SSH3	0.514786	-0.957956	5.41145e-11	4.95292e-09
RFC2	1.36703	0.451043	5.50981e-11	5.02054e-09
CTNNAL1	2.18473	1.12745	5.61525e-11	5.07442e-09
PRPS2	1.45304	0.539077	5.61845e-11	5.07442e-09
NSMAF	0.744209	-0.42622	5.84425e-11	5.25522e-09
RBMS1	0.702716	-0.508986	6.46977e-11	5.77114e-09
D2HGDH	0.604671	-0.725779	6.4743e-11	5.77114e-09
ZMYND10	2.7885	1.47949	6.54298e-11	5.80711e-09
RPN1	1.27368	0.349	6.75561e-11	5.96998e-09
KIF15	1.73408	0.794173	7.09316e-11	6.24137e-09
ZW10	1.31455	0.394571	7.19865e-11	6.27134e-09
TOB2	0.724971	-0.464005	7.21411e-11	6.27134e-09
FBXO10	1.65785	0.729313	7.21899e-11	6.27134e-09
STX5	1.34775	0.430557	7.33352e-11	6.34396e-09
RAPGEFL1	0.342406	-1.54622	7.39109e-11	6.36689e-09
GMPS	1.41132	0.497045	7.79188e-11	6.68406e-09
GTF3C5	1.42649	0.512473	8.02832e-11	6.85819e-09
NCAPG2	1.55948	0.641066	8.38234e-11	7.1309e-09
DCTN3	1.4166	0.502437	8.89162e-11	7.5319e-09
H1FX	1.44327	0.529344	8.92719e-11	7.5319e-09
AKR1C1	0.208319	-2.26313	9.20763e-11	7.73667e-09
HERC5	2.68511	1.42498	9.72998e-11	8.14221e-09
RPA2	1.3425	0.424923	1.03981e-10	8.66589e-09
CDCA5	1.64321	0.716517	1.06806e-10	8.86535e-09
COG3	0.698263	-0.518157	1.0942e-10	9.04571e-09
LSM2	1.36989	0.454062	1.1093e-10	9.13371e-09
QSOX2	1.56244	0.6438	1.15456e-10	9.46832e-09
SLFN11	2.48819	1.31509	1.18651e-10	9.69156e-09
FUNDC2	1.33891	0.421054	1.29366e-10	1.05249e-08
TMEM168	0.640927	-0.641769	1.3038e-10	1.05449e-08
SPATA20	0.61404	-0.703595	1.30641e-10	1.05449e-08
SPAG17	0.260525	-1.9405	1.38195e-10	1.11109e-08
HSD17B2	0.184682	-2.43688	1.42379e-10	1.14025e-08
CAB39L	0.357309	-1.48476	1.43021e-10	1.14094e-08
LOC100302401	1.75467	0.811204	1.44895e-10	1.15141e-08
CSTF2	1.36019	0.443811	1.45866e-10	1.15465e-08
VPS35	0.748627	-0.417682	1.53142e-10	1.20369e-08
SECTM1	3.36744	1.75165	1.53236e-10	1.20369e-08
PRDX4	1.45996	0.54593	1.56729e-10	1.22327e-08
CREB3	1.39773	0.483089	1.56922e-10	1.22327e-08
KBTBD6	0.690361	-0.534577	1.61416e-10	1.25244e-08
ZNF652	0.706368	-0.501508	1.61885e-10	1.25244e-08
PBX3	1.55851	0.640171	1.68926e-10	1.29805e-08
ZDHHC7	0.712503	-0.489032	1.69046e-10	1.29805e-08
SH3BP1	0.572317	-0.805115	1.73503e-10	1.3273e-08
RRM1	1.50744	0.592104	1.74281e-10	1.3283e-08
HINT2	1.50327	0.588104	1.81504e-10	1.37822e-08
HTATSF1	1.2919	0.36949	1.82882e-10	1.38356e-08
HIST1H2BO	2.09518	1.06708	1.84096e-10	1.38763e-08
IYD	0.268677	-1.89605	1.87232e-10	1.40609e-08
C11orf75	1.72487	0.786491	1.91164e-10	1.43038e-08
UHRF2	1.49439	0.579554	1.98268e-10	1.47814e-08
MCC	0.475988	-1.071	2.05942e-10	1.52979e-08
CDC7	1.56726	0.648245	2.15421e-10	1.59443e-08
SLC31A2	1.92717	0.946485	2.16997e-10	1.60031e-08
C10orf67	2.85733	1.51467	2.18998e-10	1.60928e-08
PIGB	0.739115	-0.436129	2.25548e-10	1.65149e-08
POC1A	1.52344	0.607331	2.3467e-10	1.71217e-08
DGKA	0.573884	-0.801168	2.37398e-10	1.72593e-08
SYCE2	2.05637	1.0401	2.39391e-10	1.73428e-08
FARP2	0.598589	-0.740363	2.41701e-10	1.74338e-08
RFX7	0.689585	-0.536199	2.42349e-10	1.74338e-08
TMTC3	0.65735	-0.605266	2.51502e-10	1.8029e-08
STX6	0.737758	-0.43878	2.56767e-10	1.83423e-08
KCNRG	0.558328	-0.840814	2.57815e-10	1.83532e-08
FAM72D	1.7079	0.772227	2.59835e-10	1.84146e-08
POLA2	1.40482	0.490382	2.60474e-10	1.84146e-08
PLK1	1.64831	0.720987	2.65477e-10	1.86696e-08
OGG1	1.4649	0.550802	2.65902e-10	1.86696e-08
CECR2	0.225991	-2.14566	2.68565e-10	1.87429e-08
KLHL3	0.513037	-0.962866	2.69442e-10	1.87429e-08
IFI27L1	1.79692	0.845524	2.69688e-10	1.87429e-08
MGST2	0.612014	-0.708363	2.86348e-10	1.98334e-08
WDR62	1.70207	0.767291	2.88275e-10	1.98997e-08
SMU1	1.2902	0.36759	3.02138e-10	2.07867e-08
EPHX2	0.321596	-1.63668	3.1628e-10	2.16868e-08
ECT2	1.59456	0.673156	3.2105e-10	2.19406e-08
ZNF276	0.691639	-0.531909	3.26828e-10	2.22473e-08
GOLM1	1.66927	0.739219	3.27709e-10	2.22473e-08
NKAP	1.24783	0.319419	3.37381e-10	2.28284e-08
C14orf142	1.36376	0.447586	3.40405e-10	2.29572e-08
RAB42	2.12524	1.08763	3.43542e-10	2.30928e-08
WIPI2	1.26181	0.335493	3.454e-10	2.31418e-08
FKBP5	2.21435	1.14688	3.50873e-10	2.34319e-08
IQCC	1.4784	0.564036	3.58072e-10	2.37997e-08
CTSL1	1.97846	0.984375	3.58701e-10	2.37997e-08
FOXM1	1.66833	0.738401	3.65486e-10	2.41716e-08
DOPEY1	0.693803	-0.527403	3.72988e-10	2.45884e-08
ARID2	0.713549	-0.486915	3.74382e-10	2.46012e-08
OXCT1	2.53077	1.33957	3.78677e-10	2.48039e-08
SP5	3.04897	1.60832	3.84344e-10	2.5095e-08
C1QL4	2.27236	1.18419	4.00997e-10	2.60992e-08
KIAA1841	1.47225	0.558022	4.22644e-10	2.74211e-08
GJC1	2.04414	1.03149	4.26331e-10	2.7573e-08
CHKB-CPT1B	0.565813	-0.821602	4.37504e-10	2.82066e-08
NFIB	2.0106	1.00763	4.56015e-10	2.93079e-08
PPIL5	1.42452	0.510476	4.66312e-10	2.9876e-08
RNF26	1.34848	0.43133	4.75147e-10	3.03472e-08
C9orf114	1.36684	0.450842	4.78504e-10	3.04667e-08
ACP2	1.42659	0.512574	4.82324e-10	3.06149e-08
C5orf34	1.60836	0.685591	4.84998e-10	3.06896e-08
FTSJ2	1.2582	0.331363	4.87316e-10	3.07151e-08
SPC24	1.77938	0.831375	4.88397e-10	3.07151e-08
KIAA0776	0.709559	-0.495006	5.00214e-10	3.13621e-08
NUDT4	0.584831	-0.773909	5.03684e-10	3.1419e-08
TOR2A	1.3603	0.443922	5.04187e-10	3.1419e-08
ZNF518B	0.469252	-1.09157	5.08321e-10	3.15806e-08
TDRD7	1.47874	0.564364	5.11506e-10	3.16824e-08
CDKAL1	1.67749	0.7463	5.29637e-10	3.27067e-08
FAM10A4	0.748478	-0.417968	5.53414e-10	3.40707e-08
HIST2H3C	2.10021	1.07054	5.55049e-10	3.40707e-08
WSB2	0.764128	-0.388115	5.82036e-10	3.56206e-08
GPN1	1.26657	0.34093	5.95774e-10	3.63529e-08
SNRNP40	1.2661	0.340392	6.33534e-10	3.85422e-08
LOC441089	1.44569	0.531754	6.37956e-10	3.86964e-08
NASP	1.34298	0.425433	6.73507e-10	4.06638e-08
PHKB	0.739163	-0.436035	6.74359e-10	4.06638e-08
KRTAP5-8	0.373377	-1.42129	6.95346e-10	4.18064e-08
SCNM1	1.41855	0.504418	6.99869e-10	4.19553e-08
SLC1A4	1.83092	0.872567	7.16037e-10	4.27994e-08
MYBL2	1.77473	0.827596	7.18942e-10	4.28481e-08
SLC25A19	1.40356	0.48909	7.34969e-10	4.36763e-08
ATXN10	0.75056	-0.413961	7.42461e-10	4.3994e-08
DOLK	1.32715	0.408334	7.45738e-10	4.40609e-08
ZDHHC12	1.46367	0.549587	7.77384e-10	4.57986e-08
C9orf46	1.60583	0.683318	7.85151e-10	4.61237e-08
CDC25B	1.87822	0.909367	7.94441e-10	4.65361e-08
PKN3	1.72644	0.787797	7.99661e-10	4.67084e-08
C9orf78	1.33834	0.420444	8.05975e-10	4.69435e-08
SECISBP2	1.32553	0.406565	8.27972e-10	4.8088e-08
PEA15	1.45624	0.542245	8.37751e-10	4.85186e-08
LOC389493	0.280124	-1.83586	8.44974e-10	4.8799e-08
MT1M	3.54111	1.8242	8.56099e-10	4.93027e-08
COX18	0.76763	-0.381517	8.71773e-10	5.00647e-08
GPR180	1.4142	0.49999	8.75105e-10	5.01156e-08
KRTAP5-9	0.283658	-1.81777	8.85714e-10	5.05819e-08
FAM57B	2.16855	1.11673	8.99554e-10	5.12296e-08
CDK2AP1	0.741253	-0.431961	9.49824e-10	5.39426e-08
HDGF	1.3041	0.383059	9.93423e-10	5.62629e-08
SH3KBP1	2.07945	1.0562	1.00069e-09	5.65182e-08
SPOCD1	0.301638	-1.72911	1.01127e-09	5.69588e-08
FAM160B1	0.741887	-0.430729	1.02245e-09	5.7431e-08
MAN1B1	1.39632	0.481631	1.02968e-09	5.76791e-08
ANKRD50	0.544603	-0.876723	1.03679e-09	5.79189e-08
CDC20	1.67659	0.745532	1.04068e-09	5.79785e-08
PIK3R2	0.758535	-0.398712	1.05573e-09	5.86575e-08
GPR137C	2.21118	1.14481	1.06326e-09	5.89159e-08
SUV39H1	1.46044	0.5464	1.09098e-09	6.02893e-08
GLTP	0.588247	-0.765506	1.10992e-09	6.11707e-08
SPTAN1	1.44451	0.530578	1.13319e-09	6.22861e-08
FBXW5	1.41132	0.49705	1.13885e-09	6.24296e-08
DNAJA1	1.47205	0.557831	1.2665e-09	6.92421e-08
MAD2L2	1.50704	0.591718	1.27758e-09	6.96621e-08
ALDOC	0.465707	-1.10251	1.2989e-09	7.06366e-08
RNF157	2.78724	1.47884	1.3341e-09	7.23592e-08
ANXA3	3.22594	1.68972	1.34026e-09	7.25015e-08
DTNB	1.65679	0.728388	1.40986e-09	7.60656e-08
UGT2B28	0.435936	-1.19781	1.42805e-09	7.68447e-08
ARL1	0.768837	-0.379251	1.45226e-09	7.7943e-08
ARAP3	0.610997	-0.710762	1.46126e-09	7.82215e-08
TUBB2A	2.31342	1.21003	1.48044e-09	7.90414e-08
MAML3	0.536188	-0.899189	1.5023e-09	8.00004e-08
ZNF655	0.635105	-0.654932	1.51439e-09	8.04353e-08
SNX15	1.28913	0.366393	1.54946e-09	8.20854e-08
CLTA	1.38105	0.465764	1.57814e-09	8.33894e-08
MMD	1.91833	0.939848	1.65675e-09	8.70281e-08
C12orf70	2.0757	1.0536	1.65787e-09	8.70281e-08
ACOT7	1.59674	0.67513	1.65974e-09	8.70281e-08
C21orf67	1.7672	0.821465	1.67244e-09	8.74706e-08
MYO19	1.35868	0.442205	1.68041e-09	8.74733e-08
ARNTL2	2.12669	1.08861	1.68103e-09	8.74733e-08
CD83	1.68864	0.755864	1.6935e-09	8.78991e-08
LOC100188947	0.180112	-2.47303	1.70233e-09	8.81344e-08
FLJ12825	0.438217	-1.19028	1.71445e-09	8.85383e-08
GPRC5C	0.332874	-1.58695	1.72469e-09	8.88434e-08
NUP155	1.54021	0.623124	1.74836e-09	8.98366e-08
GNG4	4.00277	2.001	1.78281e-09	9.13781e-08
MAST2	1.42469	0.510645	1.79922e-09	9.19889e-08
MED27	1.38718	0.472156	1.92308e-09	9.80769e-08
NRXN3	0.266881	-1.90573	1.95551e-09	9.94836e-08
GLIPR2	2.18326	1.12648	1.99677e-09	1.01331e-07
AGTPBP1	1.50972	0.594276	2.03892e-09	1.03215e-07
RCC1	1.4524	0.538442	2.07985e-09	1.05028e-07
MAN2C1	0.725878	-0.462201	2.08675e-09	1.05117e-07
CYP3A5	0.217043	-2.20395	2.09235e-09	1.05141e-07
CDCA8	1.47783	0.563478	2.16471e-09	1.08511e-07
SAC3D1	1.50798	0.592617	2.33759e-09	1.16891e-07
LPIN3	0.634168	-0.657062	2.34909e-09	1.1718e-07
DPP4	3.38255	1.75811	2.39176e-09	1.19019e-07
MDC1	1.37621	0.460704	2.44453e-09	1.21351e-07
OR2B6	1.93076	0.949168	2.47408e-09	1.22521e-07
AADAC	0.198998	-2.32918	2.49023e-09	1.23023e-07
C20orf141	2.35599	1.23634	2.50628e-09	1.23518e-07
CEP290	0.655741	-0.608802	2.54602e-09	1.24976e-07
SPG7	0.729648	-0.454727	2.54805e-09	1.24976e-07
YWHAH	1.35404	0.43727	2.55492e-09	1.25014e-07
ASB6	1.27304	0.348274	2.56496e-09	1.25207e-07
C7orf50	1.44657	0.532633	2.58283e-09	1.25779e-07
RTKN	1.7581	0.81402	2.60053e-09	1.26341e-07
ESYT3	2.58503	1.37018	2.6292e-09	1.27242e-07
DPM2	1.41534	0.501151	2.63148e-09	1.27242e-07
NUP214	1.28237	0.358813	2.64e-09	1.27354e-07
LOXL3	1.82055	0.864376	2.65448e-09	1.27752e-07
CDC25C	1.56237	0.643734	2.66094e-09	1.27763e-07
HIST1H2BK	1.93174	0.949905	2.7289e-09	1.30719e-07
CHCHD3	1.2984	0.376731	2.73569e-09	1.30739e-07
KRTAP5-10	0.401225	-1.31752	2.77456e-09	1.32285e-07
TP53INP1	0.62798	-0.67121	2.78095e-09	1.32285e-07
GTF2H4	1.28297	0.359484	2.79726e-09	1.32531e-07
RAD23B	1.3092	0.388682	2.79904e-09	1.32531e-07
SPC25	1.49697	0.582043	2.80699e-09	1.32601e-07
HTRA2	1.32027	0.400835	2.815e-09	1.32674e-07
TRIP13	1.68813	0.755426	2.8586e-09	1.3442e-07
PSMB7	1.37303	0.457364	2.90033e-09	1.3607e-07
KIAA1797	1.96537	0.974799	2.92493e-09	1.36911e-07
UBR3	0.737587	-0.439115	2.93808e-09	1.37213e-07
BTBD16	0.134001	-2.89968	2.94669e-09	1.37302e-07
TPT1	0.705312	-0.503667	2.98372e-09	1.38712e-07
FAM81A	2.04363	1.03113	3.06705e-09	1.42264e-07
NUDT12	0.517985	-0.949019	3.08389e-09	1.42722e-07
RASSF6	0.338093	-1.56451	3.09187e-09	1.42769e-07
HINFP	1.31945	0.399931	3.16116e-09	1.45603e-07
ZDHHC14	1.66843	0.738488	3.16745e-09	1.45603e-07
GJA1	0.439079	-1.18745	3.18227e-09	1.45957e-07
UBE2R2	1.31399	0.393956	3.27379e-09	1.4982e-07
PCP4L1	0.191276	-2.38627	3.29321e-09	1.50373e-07
C9orf9	1.62435	0.699865	3.49722e-09	1.59235e-07
POLD3	1.29532	0.373303	3.50283e-09	1.59235e-07
RAB5B	0.767581	-0.381609	3.54706e-09	1.60889e-07
KDM5B	0.702714	-0.508991	3.57808e-09	1.61938e-07
C22orf32	0.693278	-0.528495	3.73228e-09	1.68544e-07
MCOLN3	3.43166	1.77891	3.82087e-09	1.72166e-07
WDR59	0.764619	-0.387187	3.84771e-09	1.72995e-07
DEPDC7	2.95958	1.56539	3.8741e-09	1.73801e-07
LOC388588	0.436786	-1.195	3.95209e-09	1.76912e-07
ADPRH	1.72851	0.789532	4.0143e-09	1.79305e-07
SHROOM3	2.15129	1.1052	4.2084e-09	1.87567e-07
UHRF1	1.50456	0.589346	4.28231e-09	1.90447e-07
STOML2	1.37711	0.461643	4.31519e-09	1.91494e-07
CMPK2	2.08545	1.06036	4.35461e-09	1.9265e-07
ZBTB5	1.3655	0.449424	4.36003e-09	1.9265e-07
HPSE	2.43679	1.28498	4.49014e-09	1.97972e-07
KIF4B	1.55721	0.63896	4.64207e-09	2.04019e-07
NKAIN2	0.261451	-1.93539	4.6472e-09	2.04019e-07
RIMKLB	1.91601	0.938101	4.66787e-09	2.04488e-07
CCDC115	0.74283	-0.428896	4.7023e-09	2.05262e-07
ZNF561	0.707882	-0.498419	4.70555e-09	2.05262e-07
UGT1A9	0.186607	-2.42193	4.80725e-09	2.09253e-07
ODF2	1.31116	0.390847	4.86578e-09	2.11352e-07
ZFC3H1	0.721782	-0.470366	4.93704e-09	2.13994e-07
GLE1	1.38002	0.464687	5.01146e-09	2.16762e-07
PVRL1	0.470785	-1.08686	5.04634e-09	2.17811e-07
GNA12	1.49992	0.584886	5.19511e-09	2.23338e-07
LRRN4	2.48283	1.31198	5.19618e-09	2.23338e-07
MAP9	0.389767	-1.35932	5.2486e-09	2.25119e-07
STAT6	0.711538	-0.490988	5.34541e-09	2.28793e-07
TESK1	1.32875	0.410074	5.40612e-09	2.30909e-07
BLCAP	0.645126	-0.632347	5.45059e-09	2.32324e-07
IRS1	0.481777	-1.05356	5.48012e-09	2.33098e-07
MAPKAP1	1.2544	0.327003	5.61619e-09	2.38392e-07
BTG2	0.494203	-1.01683	5.64504e-09	2.39121e-07
WNT7B	0.436634	-1.1955	5.6681e-09	2.39268e-07
ALG12	0.781262	-0.356122	5.67842e-09	2.39268e-07
BAT4	1.3378	0.419857	5.68351e-09	2.39268e-07
CDC37L1	1.38821	0.473231	5.75968e-09	2.41977e-07
C9orf123	1.44546	0.531527	5.88055e-09	2.4655e-07
TIGD3	1.97143	0.979241	5.97683e-09	2.50075e-07
ITM2B	0.628769	-0.669397	6.21389e-09	2.59465e-07
NCKIPSD	1.37552	0.45998	6.25411e-09	2.60613e-07
ELK1	1.29772	0.375979	6.30629e-09	2.62255e-07
MMGT1	1.35089	0.43391	6.35147e-09	2.63599e-07
GINS1	1.46138	0.547335	6.70885e-09	2.77868e-07
SNX1	0.792757	-0.335049	6.99255e-09	2.89035e-07
RGS12	0.659115	-0.601397	7.03647e-09	2.90265e-07
AIF1L	2.47038	1.30474	7.19647e-09	2.96269e-07
FMNL1	1.96328	0.973265	7.28694e-09	2.99393e-07
LRMP	0.349433	-1.51691	7.36542e-09	3.02012e-07
CHP2	0.17898	-2.48213	7.41093e-09	3.03271e-07
SENP3	1.30439	0.383378	7.70839e-09	3.14816e-07
TAS2R5	0.519196	-0.945649	7.72437e-09	3.14841e-07
AASS	0.501242	-0.996421	7.82867e-09	3.18459e-07
AURKB	1.59033	0.669323	7.86852e-09	3.19446e-07
RASSF1	1.39671	0.482032	7.89089e-09	3.19722e-07
CROT	0.518713	-0.946991	8.16375e-09	3.30125e-07
IBTK	0.772763	-0.371902	8.38127e-09	3.38254e-07
GLO1	1.34319	0.425658	8.52216e-09	3.43264e-07
SDHA	1.37239	0.456693	8.62926e-09	3.46896e-07
DOK4	0.669735	-0.578338	8.70504e-09	3.49258e-07
KIAA0226	1.2778	0.353663	9.0925e-09	3.64091e-07
CPNE3	0.726174	-0.461613	9.11511e-09	3.64284e-07
VPS72	1.32853	0.409826	9.28536e-09	3.70367e-07
ABCC6P2	1.99612	0.997196	9.33475e-09	3.71614e-07
ENTPD7	0.580769	-0.783963	9.36704e-09	3.72176e-07
WDR72	0.200007	-2.32188	9.39631e-09	3.72617e-07
ARHGAP29	2.13876	1.09677	9.47119e-09	3.74498e-07
CDK2	1.38524	0.47014	9.48028e-09	3.74498e-07
RNF10	0.826145	-0.275533	9.62592e-09	3.7952e-07
TMEM38B	1.74877	0.806338	9.75888e-09	3.84024e-07
SHH	0.204389	-2.29061	1.00688e-08	3.9523e-07
NAV2	1.92245	0.942947	1.00822e-08	3.9523e-07
CTDSP1	0.756789	-0.402036	1.05322e-08	4.12083e-07
AMH	2.87161	1.52186	1.05573e-08	4.12278e-07
NONO	1.24436	0.315401	1.05971e-08	4.12545e-07
RADIL	2.28862	1.19448	1.06044e-08	4.12545e-07
LAGE3	1.41673	0.502563	1.07503e-08	4.17428e-07
PARP2	1.31183	0.391585	1.08901e-08	4.21551e-07
CDH8	0.365101	-1.45363	1.08976e-08	4.21551e-07
ZCCHC7	1.30754	0.386852	1.09462e-08	4.22635e-07
SCML2	2.64835	1.40509	1.11072e-08	4.28046e-07
RHBDF1	0.661061	-0.597145	1.12513e-08	4.32784e-07
KLHL35	2.16441	1.11397	1.1311e-08	4.34266e-07
MPG	0.719114	-0.475707	1.14247e-08	4.37045e-07
TIPIN	1.36747	0.451507	1.14354e-08	4.37045e-07
RPA1	1.33671	0.418684	1.14473e-08	4.37045e-07
BMP7	0.195418	-2.35536	1.14797e-08	4.37466e-07
RNF130	1.752	0.809004	1.15528e-08	4.39437e-07
LOC100133985	1.91491	0.937274	1.15973e-08	4.40311e-07
ACOT4	1.83095	0.872591	1.18072e-08	4.47451e-07
RNF20	1.30161	0.380292	1.19475e-08	4.51934e-07
HOXD3	0.43451	-1.20254	1.20932e-08	4.566e-07
GYS1	0.75793	-0.399863	1.21691e-08	4.58622e-07
MCTP2	0.489927	-1.02936	1.23735e-08	4.65471e-07
RPL4	0.715705	-0.482563	1.26231e-08	4.73989e-07
NACA	0.783782	-0.351476	1.29646e-08	4.85351e-07
IFT122	1.36933	0.453469	1.2973e-08	4.85351e-07
C2orf89	3.03986	1.60401	1.32507e-08	4.94839e-07
CCL28	2.44529	1.29001	1.33214e-08	4.96573e-07
SIGMAR1	1.43486	0.520909	1.34334e-08	4.99841e-07
C9orf69	1.39528	0.480557	1.36558e-08	5.07194e-07
VAPA	1.28702	0.364037	1.37021e-08	5.07993e-07
TSPAN31	0.762036	-0.392069	1.38122e-08	5.11152e-07
TMBIM1	0.608123	-0.717565	1.38539e-08	5.11769e-07
HAUS6	1.47784	0.563486	1.39064e-08	5.12785e-07
POMT1	1.4094	0.495084	1.39932e-08	5.15059e-07
ABAT	0.389437	-1.36054	1.41435e-08	5.19661e-07
ABCA10	0.310127	-1.68907	1.4212e-08	5.21242e-07
ABCB6	0.558734	-0.839766	1.45502e-08	5.32692e-07
CNGB3	0.460616	-1.11836	1.48539e-08	5.42844e-07
GOT2	0.748969	-0.417023	1.5005e-08	5.47387e-07
C17orf79	1.39441	0.479651	1.51006e-08	5.49897e-07
CD46	0.68167	-0.552855	1.52031e-08	5.52464e-07
PRPF3	1.33563	0.417519	1.5225e-08	5.52464e-07
S100PBP	1.24695	0.318399	1.52834e-08	5.53149e-07
METAP1	0.722009	-0.469911	1.52978e-08	5.53149e-07
ORAI3	0.639122	-0.645837	1.55109e-08	5.59865e-07
LLGL1	1.38895	0.473993	1.55748e-08	5.61184e-07
AIMP2	1.37282	0.457147	1.5624e-08	5.61972e-07
NDUFAF1	0.767864	-0.381078	1.61796e-08	5.80092e-07
PQLC1	1.35579	0.439128	1.61878e-08	5.80092e-07
L1CAM	5.41944	2.43814	1.62127e-08	5.80092e-07
CCDC90A	1.36949	0.453637	1.6242e-08	5.80129e-07
OXTR	2.15612	1.10844	1.69606e-08	6.04743e-07
TBC1D13	1.40859	0.494256	1.70276e-08	6.05676e-07
TEAD4	1.9814	0.986522	1.70459e-08	6.05676e-07
C16orf75	1.62633	0.701622	1.72247e-08	6.10969e-07
GPSM2	1.46724	0.553104	1.76897e-08	6.26381e-07
TOR1B	1.32617	0.40727	1.78755e-08	6.31425e-07
MBD6	0.745078	-0.424536	1.78938e-08	6.31425e-07
MED4	0.783648	-0.351721	1.80949e-08	6.37087e-07
ZNF280D	0.756161	-0.403235	1.81164e-08	6.37087e-07
PPM1G	1.25584	0.328658	1.83699e-08	6.44675e-07
DDX31	1.32741	0.408613	1.8395e-08	6.44675e-07
KIF2C	1.45858	0.544565	1.86805e-08	6.53563e-07
DGAT1	0.704133	-0.506079	1.89323e-08	6.61245e-07
THAP4	0.767376	-0.381994	1.94348e-08	6.77641e-07
BRD1	0.756177	-0.403204	1.98489e-08	6.90392e-07
RBL2	0.713006	-0.488013	1.98679e-08	6.90392e-07
METTL4	1.39086	0.475978	2.00766e-08	6.96465e-07
MOBKL1A	0.772962	-0.37153	2.07425e-08	7.1835e-07
PSMC3	1.3048	0.383831	2.08376e-08	7.20427e-07
CCNJ	0.544118	-0.878008	2.09776e-08	7.23157e-07
MUC16	6.81019	2.76769	2.09871e-08	7.23157e-07
SDCCAG3	1.34224	0.424642	2.13847e-08	7.35619e-07
CENPL	1.40458	0.490144	2.1581e-08	7.41128e-07
ZBTB7A	0.770866	-0.375447	2.2007e-08	7.54495e-07
C21orf70	1.47019	0.556004	2.22946e-08	7.63079e-07
ISY1	1.21729	0.283678	2.25163e-08	7.69382e-07
SRRM2	0.778623	-0.361003	2.29579e-08	7.83166e-07
RAD1	1.31178	0.39153	2.31026e-08	7.86792e-07
BCL6	0.656473	-0.607192	2.32935e-08	7.91978e-07
FER1L6	0.371829	-1.42729	2.34554e-08	7.95562e-07
PDXP	1.48824	0.573605	2.3514e-08	7.95562e-07
PGBD1	1.66542	0.735888	2.35825e-08	7.95562e-07
ATP2C2	0.329539	-1.60148	2.35878e-08	7.95562e-07
CT62	1.95808	0.969437	2.36201e-08	7.95562e-07
EP300	0.691963	-0.531234	2.36317e-08	7.95562e-07
PLEKHH3	0.648307	-0.62525	2.38118e-08	7.99074e-07
CALM2	1.28373	0.360339	2.38461e-08	7.99074e-07
RUSC2	1.59801	0.67628	2.3853e-08	7.99074e-07
COX4I1	0.73078	-0.45249	2.39337e-08	8.00472e-07
LPIN2	1.75035	0.807641	2.40132e-08	8.01822e-07
CKS1B	1.43893	0.524995	2.43095e-08	8.10396e-07
ZP3	1.66051	0.731625	2.45641e-08	8.17552e-07
SRGAP2	1.32252	0.403285	2.47726e-08	8.23157e-07
RNF5	1.3115	0.391222	2.52001e-08	8.36008e-07
LOC100131496	1.69201	0.758734	2.54379e-08	8.41204e-07
TSPAN14	0.723463	-0.467009	2.54619e-08	8.41204e-07
SIP1	1.33677	0.418753	2.54798e-08	8.41204e-07
UST	0.469549	-1.09065	2.56402e-08	8.44916e-07
C22orf24	1.39058	0.47569	2.56952e-08	8.44916e-07
SAMD5	0.410252	-1.28542	2.57159e-08	8.44916e-07
SLC23A3	0.482736	-1.05069	2.58779e-08	8.48877e-07
TERF2IP	0.772518	-0.37236	2.63951e-08	8.64459e-07
CHST2	0.412005	-1.27927	2.67562e-08	8.7489e-07
FAM72B	1.51945	0.603548	2.72638e-08	8.90068e-07
GSTM4	0.397992	-1.32919	2.75735e-08	8.98748e-07
C1orf135	1.49249	0.577723	2.79457e-08	9.08704e-07
PPP2R4	1.25878	0.33203	2.79676e-08	9.08704e-07
PTPN13	0.49523	-1.01383	2.81086e-08	9.10487e-07
P2RX5	2.0609	1.04328	2.81113e-08	9.10487e-07
TM9SF3	0.806039	-0.311079	2.88066e-08	9.31535e-07
SF3B1	0.79195	-0.336519	2.91839e-08	9.42248e-07
C9orf30	1.43394	0.519988	2.92575e-08	9.43139e-07
KPNA2	1.41466	0.500457	3.01305e-08	9.69758e-07
APTX	1.31952	0.400015	3.06808e-08	9.85922e-07
SUFU	0.756666	-0.402271	3.11815e-08	1.00044e-06
C9orf21	1.86568	0.899705	3.17594e-08	1.01739e-06
CHST7	1.72049	0.782816	3.25783e-08	1.04198e-06
MCART2	1.46013	0.546096	3.26285e-08	1.04198e-06
MAD1L1	1.32594	0.407018	3.29965e-08	1.05128e-06
VAV3	0.42158	-1.24612	3.30223e-08	1.05128e-06
FAM162A	0.636943	-0.650763	3.32502e-08	1.05689e-06
IL11	2.69296	1.42919	3.39153e-08	1.07609e-06
C1orf161	0.341378	-1.55056	3.3959e-08	1.07609e-06
DHRS3	0.516389	-0.953469	3.47295e-08	1.0988e-06
HAX1	1.24864	0.320353	3.49823e-08	1.1051e-06
CAPN14	0.371219	-1.42966	3.52598e-08	1.11215e-06
C18orf45	1.60012	0.678181	3.54085e-08	1.11512e-06
PDCD1LG2	3.05378	1.6106	3.59915e-08	1.13003e-06
RSAD2	2.653	1.40763	3.59922e-08	1.13003e-06
FAM118B	1.32327	0.404113	3.60705e-08	1.13076e-06
SNX14	0.786922	-0.345708	3.6431e-08	1.14032e-06
DDX58	1.85657	0.892642	3.66672e-08	1.14596e-06
REXO4	1.31229	0.39209	3.73698e-08	1.16614e-06
DCAF10	1.307	0.386257	3.74818e-08	1.16786e-06
APBB1	2.12626	1.08832	3.81585e-08	1.18677e-06
TRIB2	0.481826	-1.05342	3.82045e-08	1.18677e-06
ARIH1	0.794429	-0.332009	3.87918e-08	1.20319e-06
NXNL2	1.94742	0.961566	3.90944e-08	1.21074e-06
ASRGL1	2.35687	1.23688	3.99166e-08	1.23435e-06
POU3F1	0.291741	-1.77724	4.12995e-08	1.27518e-06
C9orf156	1.2978	0.376069	4.15143e-08	1.27989e-06
NAA35	1.27637	0.352048	4.18259e-08	1.28756e-06
CLSPN	1.89971	0.925779	4.20182e-08	1.29154e-06
TUBG1	1.26942	0.344171	4.21641e-08	1.29408e-06
UAP1	1.49567	0.580789	4.31002e-08	1.32084e-06
CNOT2	0.799333	-0.323131	4.37885e-08	1.33993e-06
PDZK1	2.56667	1.3599	4.42216e-08	1.35116e-06
C15orf55	2.12955	1.09055	4.44195e-08	1.35519e-06
NDRG4	0.442607	-1.1759	4.48747e-08	1.36705e-06
ABLIM2	2.26637	1.18038	4.52779e-08	1.37728e-06
MAP3K14	1.57331	0.653801	4.68737e-08	1.42371e-06
PRC1	1.4531	0.539136	4.73092e-08	1.43481e-06
RDBP	1.29136	0.368892	4.87433e-08	1.47612e-06
METTL11A	1.38946	0.474526	4.94224e-08	1.49448e-06
KATNAL1	1.9564	0.968204	4.98837e-08	1.50621e-06
HAUS1	1.36751	0.451551	4.99707e-08	1.50662e-06
SPG11	0.758648	-0.398497	5.03683e-08	1.51518e-06
C5orf25	2.34329	1.22854	5.04026e-08	1.51518e-06
CCNDBP1	0.785971	-0.347453	5.12549e-08	1.53855e-06
NDUFA4L2	0.359628	-1.47542	5.169e-08	1.54744e-06
XK	2.56467	1.35877	5.1704e-08	1.54744e-06
NEIL3	1.78143	0.833038	5.17776e-08	1.54744e-06
HNMT	0.547134	-0.870034	5.23036e-08	1.56082e-06
NFAT5	0.681208	-0.553833	5.23775e-08	1.56082e-06
GLT25D1	1.38715	0.472123	5.2725e-08	1.56694e-06
TARS	1.40646	0.49207	5.27356e-08	1.56694e-06
C13orf1	0.661603	-0.595961	5.34878e-08	1.58699e-06
URM1	1.31568	0.395808	5.38227e-08	1.59461e-06
RAD54L	1.45266	0.538702	5.46967e-08	1.61817e-06
MCM3	1.38073	0.465428	5.48953e-08	1.6217e-06
DIS3L2	0.767505	-0.381751	5.54764e-08	1.63651e-06
SPIN1	1.32045	0.401028	5.57151e-08	1.64119e-06
TP63	0.245704	-2.02501	5.59936e-08	1.64648e-06
TUBGCP3	1.33355	0.415275	5.6055e-08	1.64648e-06
PYCR2	0.766884	-0.38292	5.61976e-08	1.6483e-06
FLVCR2	1.73111	0.791695	5.6767e-08	1.66262e-06
SCAMP1	0.757503	-0.400676	5.68984e-08	1.6641e-06
HIATL1	1.33288	0.414549	5.70273e-08	1.66549e-06
ZMYND15	1.94257	0.957964	5.7112e-08	1.66559e-06
ZCCHC17	1.18264	0.242008	5.77105e-08	1.67771e-06
LOC284837	0.372312	-1.42541	5.77375e-08	1.67771e-06
WNT5A	0.412179	-1.27866	5.7773e-08	1.67771e-06
FKBP15	1.27	0.344833	5.82715e-08	1.68979e-06
RPL3	0.743511	-0.427574	5.85113e-08	1.69435e-06
SLC38A2	0.672481	-0.572435	5.90512e-08	1.70757e-06
NRM	1.43588	0.521939	6.01395e-08	1.73659e-06
SYPL1	0.717806	-0.478334	6.04472e-08	1.74302e-06
CEP72	1.54301	0.625748	6.0927e-08	1.75439e-06
RAB40C	0.717592	-0.478764	6.13336e-08	1.76362e-06
AGAP3	0.725789	-0.462378	6.20647e-08	1.78053e-06
RASL10B	2.16273	1.11286	6.21579e-08	1.78053e-06
HIBCH	0.713066	-0.487892	6.21823e-08	1.78053e-06
RNF125	1.71583	0.778904	6.27649e-08	1.79471e-06
CACNA1I	0.322884	-1.63091	6.31496e-08	1.80319e-06
EPHB2	2.10219	1.0719	6.48904e-08	1.85032e-06
WDHD1	1.49398	0.579163	6.60633e-08	1.88115e-06
XPNPEP3	0.748308	-0.418295	6.79953e-08	1.93348e-06
OAZ2	0.82457	-0.278286	6.82731e-08	1.93869e-06
CXorf49B	4.01041	2.00375	6.87652e-08	1.94996e-06
CEBPA	0.444029	-1.17127	6.91492e-08	1.95814e-06
ADARB1	1.80931	0.85544	7.00167e-08	1.97997e-06
HMGB2	1.44918	0.53524	7.08268e-08	2.00013e-06
CCL18	4.1862	2.06564	7.12157e-08	2.00834e-06
MT1DP	1.67653	0.745474	7.2796e-08	2.05009e-06
NUP85	1.22627	0.294274	7.30662e-08	2.05488e-06
MSLN	5.52898	2.46701	7.45968e-08	2.09505e-06
C21orf122	1.66738	0.737586	7.48317e-08	2.09877e-06
MAPK8IP3	0.626709	-0.674133	7.51496e-08	2.1048e-06
IDH1	0.551518	-0.85852	7.55441e-08	2.11297e-06
SUGT1L1	0.615607	-0.699919	7.58031e-08	2.11732e-06
LHX3	1.49392	0.579104	7.63055e-08	2.12659e-06
WDR5	1.34178	0.424145	7.63424e-08	2.12659e-06
PLXNB2	0.727016	-0.459941	7.82935e-08	2.17798e-06
UBE2T	1.38554	0.470448	7.85338e-08	2.18171e-06
COMMD9	1.30282	0.381632	7.91625e-08	2.1962e-06
GALNT1	0.618557	-0.693022	7.98832e-08	2.2132e-06
RGS6	0.344597	-1.53702	8.10014e-08	2.24115e-06
TCF7	1.69911	0.764783	8.18168e-08	2.26066e-06
RHOT2	0.76067	-0.394658	8.25978e-08	2.27916e-06
SSRP1	1.27276	0.347964	8.27819e-08	2.28117e-06
NHP2L1	0.790223	-0.339669	8.2939e-08	2.28244e-06
SUSD3	2.25126	1.17073	8.3301e-08	2.28932e-06
ENTPD4	0.719543	-0.474846	8.34895e-08	2.29143e-06
GPR56	0.605602	-0.723557	8.38782e-08	2.29902e-06
HK1	0.745406	-0.423901	8.40789e-08	2.30145e-06
C7orf57	1.93346	0.951183	8.47014e-08	2.3154e-06
NRG4	0.387678	-1.36707	8.57082e-08	2.33787e-06
SELO	0.752002	-0.411192	8.57514e-08	2.33787e-06
CAMK1	1.5989	0.677078	8.60533e-08	2.34298e-06
MCM8	1.47291	0.558669	8.68986e-08	2.36286e-06
FLJ13197	0.54359	-0.87941	8.77963e-08	2.38411e-06
MTUS1	0.617391	-0.695744	8.79581e-08	2.38534e-06
EPHX3	0.227502	-2.13605	8.93199e-08	2.41907e-06
ZNF334	0.337742	-1.56601	9.06028e-08	2.45058e-06
TMEM66	0.759605	-0.396678	9.09912e-08	2.45784e-06
TOPBP1	1.33836	0.420465	9.32653e-08	2.51595e-06
SEH1L	1.31814	0.398507	9.47171e-08	2.55176e-06
CAMK2N2	2.05589	1.03976	9.48552e-08	2.55213e-06
CDH26	0.276366	-1.85535	9.66953e-08	2.59823e-06
CDT1	1.47312	0.558878	9.77355e-08	2.62274e-06
AP1G1	0.770857	-0.375465	9.91289e-08	2.65665e-06
NNAT	0.318484	-1.65071	1.00794e-07	2.69775e-06
IDE	0.69313	-0.528802	1.01019e-07	2.70025e-06
FAH	0.676464	-0.563914	1.01395e-07	2.70676e-06
UBE2C	1.48125	0.566814	1.0352e-07	2.75665e-06
ITGB1BP1	1.2464	0.317769	1.03532e-07	2.75665e-06
VSTM2L	3.34789	1.74325	1.04277e-07	2.77287e-06
MT2A	2.77678	1.47341	1.04724e-07	2.78115e-06
ACO2	0.790507	-0.33915	1.05034e-07	2.7825e-06
ZNF131	1.33559	0.417476	1.05046e-07	2.7825e-06
TRIB3	1.79074	0.840557	1.0538e-07	2.78774e-06
SYT12	3.11585	1.63963	1.05615e-07	2.79036e-06
SLITRK6	0.239182	-2.06382	1.06205e-07	2.80234e-06
CCL8	2.82192	1.49668	1.0677e-07	2.81362e-06
MFSD5	0.758962	-0.397901	1.06932e-07	2.81428e-06
TMEM38A	1.96131	0.971815	1.07365e-07	2.82205e-06
GRAMD2	2.74063	1.45451	1.08097e-07	2.83764e-06
ZMYND8	0.679897	-0.556611	1.08467e-07	2.84372e-06
ACAD10	0.768418	-0.380037	1.0933e-07	2.86269e-06
COCH	2.84168	1.50675	1.11965e-07	2.92795e-06
NMNAT3	0.408927	-1.29008	1.12293e-07	2.93279e-06
CKAP2L	1.64621	0.719152	1.12483e-07	2.93392e-06
EPR1	1.71704	0.779922	1.12623e-07	2.93392e-06
EP400	0.798567	-0.324514	1.13428e-07	2.94767e-06
ABTB2	1.84009	0.879775	1.13438e-07	2.94767e-06
AMFR	0.802514	-0.317402	1.13969e-07	2.95771e-06
IARS	1.36588	0.449829	1.14706e-07	2.97308e-06
SRC	0.653155	-0.614502	1.1492e-07	2.97486e-06
FBRS	0.766783	-0.38311	1.1614e-07	3.00264e-06
ANKRD11	0.7677	-0.381385	1.164e-07	3.00558e-06
RELT	1.42165	0.507567	1.17426e-07	3.02826e-06
RLN2	2.22957	1.15677	1.17924e-07	3.03727e-06
TET2	0.699838	-0.514907	1.1876e-07	3.05498e-06
HDAC5	1.33569	0.417583	1.21336e-07	3.11734e-06
ICAM1	2.29166	1.19639	1.24184e-07	3.18652e-06
IQGAP3	1.53258	0.61596	1.25413e-07	3.21402e-06
SPHK1	2.39798	1.26182	1.25745e-07	3.21851e-06
PIGO	1.33096	0.412469	1.26288e-07	3.22839e-06
CSF2	2.75954	1.46443	1.27255e-07	3.24905e-06
NACAP1	0.781797	-0.355135	1.3016e-07	3.31907e-06
NME4	0.677908	-0.560838	1.30679e-07	3.32818e-06
GPATCH3	1.22909	0.297594	1.30996e-07	3.3321e-06
MED8	1.24694	0.318387	1.3223e-07	3.35801e-06
HAUS5	1.34289	0.425337	1.32342e-07	3.35801e-06
LPAR6	0.548427	-0.866629	1.33007e-07	3.3707e-06
MCM7	1.33034	0.411795	1.3403e-07	3.39148e-06
SKA2	1.31052	0.390145	1.34157e-07	3.39148e-06
MAST4	0.537423	-0.895869	1.35071e-07	3.41038e-06
DLGAP5	1.5361	0.619267	1.35839e-07	3.42555e-06
NOTCH3	0.629907	-0.66679	1.36489e-07	3.43369e-06
PALM2	2.03984	1.02845	1.36497e-07	3.43369e-06
SLFN13	2.56606	1.35956	1.38327e-07	3.47142e-06
SYTL1	0.530001	-0.915933	1.38335e-07	3.47142e-06
STX2	1.80497	0.851974	1.40948e-07	3.53266e-06
PLCH2	0.347303	-1.52573	1.42605e-07	3.56983e-06
RGS20	2.71997	1.44359	1.4492e-07	3.62336e-06
NEK2	1.47243	0.558201	1.45743e-07	3.63949e-06
C11orf74	1.39833	0.483705	1.45931e-07	3.63975e-06
GNAI1	0.543698	-0.879124	1.46802e-07	3.65704e-06
GPR19	1.81796	0.86232	1.47235e-07	3.66336e-06
HIF1AN	0.806581	-0.310109	1.48035e-07	3.6788e-06
TRUB2	1.25413	0.326686	1.50158e-07	3.72705e-06
RANBP6	1.3649	0.448797	1.51858e-07	3.76467e-06
CRAT	1.61631	0.692706	1.5258e-07	3.77801e-06
RIBC2	1.83961	0.879401	1.53396e-07	3.79365e-06
NUSAP1	1.4416	0.527672	1.56146e-07	3.85698e-06
ADH5	0.728754	-0.456497	1.58164e-07	3.90214e-06
PRR19	1.47809	0.563732	1.61877e-07	3.98895e-06
TRAIP	1.39474	0.479998	1.62283e-07	3.99304e-06
CTNS	1.31766	0.397981	1.62433e-07	3.99304e-06
LRRFIP1	0.761104	-0.393834	1.63414e-07	4.01236e-06
USP30	0.787825	-0.344053	1.63623e-07	4.01267e-06
KIF18A	1.59014	0.669156	1.64622e-07	4.03235e-06
SUPT16H	1.28338	0.359953	1.6518e-07	4.0412e-06
DNAJC27	0.752795	-0.409672	1.66656e-07	4.06943e-06
CENPO	1.3693	0.453436	1.66886e-07	4.06943e-06
NMU	3.02135	1.59519	1.6693e-07	4.06943e-06
LPCAT2	0.534197	-0.904557	1.68516e-07	4.10297e-06
NTN1	2.69005	1.42763	1.68706e-07	4.10297e-06
EPHB6	0.347103	-1.52657	1.69783e-07	4.12428e-06
PLP2	1.5631	0.644411	1.7011e-07	4.12732e-06
SAMD1	1.28186	0.358236	1.70608e-07	4.13453e-06
IRAK1	1.39704	0.482371	1.71673e-07	4.15542e-06
HTR3A	2.20786	1.14265	1.73449e-07	4.19346e-06
YWHAQ	1.30882	0.388267	1.73915e-07	4.19976e-06
NFE2	2.42252	1.27651	1.75424e-07	4.23122e-06
LMNB1	1.42027	0.506164	1.76546e-07	4.25328e-06
MYB	2.09867	1.06948	1.76887e-07	4.25649e-06
OCIAD1	0.808941	-0.305894	1.7799e-07	4.27801e-06
GABRE	0.302751	-1.7238	1.79838e-07	4.31739e-06
ZWINT	1.47152	0.557304	1.8055e-07	4.32939e-06
CIRBP	0.712473	-0.489092	1.82592e-07	4.37324e-06
TRABD	0.740475	-0.433477	1.83229e-07	4.38339e-06
RALB	1.31614	0.396317	1.83642e-07	4.38814e-06
STAM2	0.795168	-0.330668	1.85484e-07	4.42701e-06
RNF138	1.34275	0.42519	1.8613e-07	4.43725e-06
SMG5	1.26075	0.334288	1.86833e-07	4.4439e-06
RBM44	0.56915	-0.81312	1.86843e-07	4.4439e-06
SLC35D2	1.29608	0.374156	1.88862e-07	4.48673e-06
DGKQ	0.741218	-0.432031	1.9122e-07	4.5375e-06
GBA	1.35527	0.438581	1.94602e-07	4.61242e-06
C10orf99	0.165831	-2.59221	1.95587e-07	4.63039e-06
ILF2	1.2514	0.323537	1.95888e-07	4.63217e-06
MFAP3L	0.403475	-1.30945	1.96375e-07	4.63834e-06
SORL1	0.406442	-1.29888	1.97609e-07	4.66212e-06
EAF2	1.52436	0.6082	2.01428e-07	4.74244e-06
LPCAT4	0.65777	-0.604346	2.01476e-07	4.74244e-06
CCL3	2.58111	1.36799	2.03149e-07	4.77633e-06
MBD4	1.21215	0.277573	2.04654e-07	4.80621e-06
RPL21P44	0.69849	-0.517689	2.05911e-07	4.8302e-06
WDR38	1.67625	0.74524	2.08566e-07	4.88689e-06
NCRNA00162	4.05278	2.01891	2.1028e-07	4.92143e-06
BTBD11	0.377522	-1.40537	2.11644e-07	4.94768e-06
OR13A1	0.394116	-1.34331	2.11946e-07	4.94911e-06
PTK2	0.751162	-0.412803	2.1412e-07	4.99418e-06
RNASEL	0.720077	-0.473777	2.1475e-07	5.00054e-06
EHD1	1.4092	0.494877	2.1488e-07	5.00054e-06
PTPRQ	0.27796	-1.84705	2.21751e-07	5.15457e-06
EEA1	0.704893	-0.504524	2.25708e-07	5.24062e-06
USP14	1.32483	0.405807	2.28022e-07	5.28835e-06
ORC1L	1.50806	0.59269	2.2841e-07	5.29137e-06
ZMYM2	0.728745	-0.456513	2.29329e-07	5.30339e-06
CLIC4	1.76567	0.820212	2.29481e-07	5.30339e-06
2021-09-03	2.65632	1.40943	2.29705e-07	5.30339e-06
CLPTM1L	1.36153	0.445226	2.31635e-07	5.34193e-06
PSMG1	1.36021	0.443835	2.32599e-07	5.35815e-06
LGALS8	0.764387	-0.387625	2.34893e-07	5.40491e-06
LUC7L	0.693339	-0.528368	2.36472e-07	5.43514e-06
MLYCD	0.765988	-0.384607	2.40014e-07	5.51039e-06
CTPS	1.41215	0.497892	2.40746e-07	5.521e-06
SNX31	0.154751	-2.69198	2.41921e-07	5.54174e-06
BCAS1	0.200323	-2.3196	2.42997e-07	5.55471e-06
SNHG8	0.680482	-0.555371	2.43029e-07	5.55471e-06
SURF4	1.27874	0.354718	2.43786e-07	5.56582e-06
RCBTB2	0.665243	-0.588046	2.44407e-07	5.57379e-06
SMC6	1.30741	0.386711	2.45868e-07	5.60088e-06
FTSJ1	1.26918	0.343891	2.47553e-07	5.63299e-06
AQP9	2.7451	1.45686	2.48112e-07	5.63947e-06
TFDP1	1.34006	0.422297	2.4862e-07	5.64474e-06
TMEM134	0.701244	-0.512011	2.52319e-07	5.72238e-06
SRRM3	0.432571	-1.20899	2.52739e-07	5.72558e-06
C6orf150	1.80229	0.849829	2.53128e-07	5.72807e-06
UBL4A	1.27598	0.351603	2.55019e-07	5.76449e-06
RCAN3	1.51713	0.601348	2.5717e-07	5.80672e-06
MDM4	0.735289	-0.443616	2.57835e-07	5.81532e-06
BAZ2B	0.718582	-0.476775	2.60044e-07	5.85871e-06
MINA	0.783367	-0.35224	2.62541e-07	5.90846e-06
FIGNL1	1.39133	0.476469	2.62953e-07	5.91125e-06
DHRS2	0.155949	-2.68085	2.63363e-07	5.91398e-06
CDKL2	2.10263	1.07219	2.6395e-07	5.91795e-06
LANCL1	0.734234	-0.445689	2.64117e-07	5.91795e-06
SUV39H2	1.32986	0.411276	2.64772e-07	5.91983e-06
TNFAIP8L3	2.16663	1.11545	2.64778e-07	5.91983e-06
DAPK2	1.87409	0.906193	2.66032e-07	5.93763e-06
JMJD7-PLA2G4B	0.633328	-0.658976	2.66154e-07	5.93763e-06
CEP110	1.40264	0.488146	2.6979e-07	6.01221e-06
OIP5	1.43715	0.523209	2.71392e-07	6.04133e-06
AKNAD1	1.85477	0.891238	2.72998e-07	6.07051e-06
REEP5	0.803615	-0.315424	2.76003e-07	6.13068e-06
USP3	0.768988	-0.378966	2.78002e-07	6.1684e-06
AK7	1.98034	0.985749	2.8147e-07	6.23858e-06
IMPA2	1.71034	0.774281	2.83359e-07	6.27367e-06
NEURL3	2.68822	1.42665	2.84477e-07	6.29164e-06
APRT	0.732339	-0.449416	2.85121e-07	6.29907e-06
ZNF518A	0.683043	-0.549951	2.86596e-07	6.32486e-06
CCDC21	1.39528	0.480554	2.89122e-07	6.37375e-06
SYTL3	1.7623	0.817458	2.90478e-07	6.39675e-06
PRMT1	0.774129	-0.369353	2.91816e-07	6.41803e-06
LZTS2	0.771841	-0.373624	2.9207e-07	6.41803e-06
MGLL	1.91535	0.937605	2.94455e-07	6.4635e-06
AURKA	1.44248	0.528551	2.9512e-07	6.47118e-06
EIF3L	0.782761	-0.353357	2.96586e-07	6.49637e-06
LOC100144604	0.255324	-1.9696	3.00867e-07	6.5831e-06
CDC42EP5	0.455938	-1.13309	3.05132e-07	6.66932e-06
CAD	1.32823	0.409508	3.10998e-07	6.78819e-06
PPP2R2D	0.793634	-0.333455	3.11233e-07	6.78819e-06
KRTAP5-7	0.596833	-0.744602	3.13984e-07	6.84092e-06
CAND2	2.21755	1.14897	3.14627e-07	6.84764e-06
XIRP1	2.6947	1.43012	3.15156e-07	6.84888e-06
HOXC13	0.301717	-1.72873	3.15352e-07	6.84888e-06
CBY1	0.758705	-0.398389	3.16096e-07	6.85776e-06
KLK1	2.41832	1.27401	3.1643e-07	6.85776e-06
DUSP12	1.32155	0.402234	3.18629e-07	6.89813e-06
ACTBL2	2.31888	1.21343	3.20295e-07	6.92688e-06
AKAP8	0.83238	-0.264686	3.23057e-07	6.97925e-06
MTMR10	0.759242	-0.397368	3.26289e-07	7.04166e-06
SURF6	1.27153	0.346565	3.28066e-07	7.07256e-06
HSPB1	0.581441	-0.782296	3.28452e-07	7.07346e-06
GPATCH4	1.28657	0.363533	3.30809e-07	7.11674e-06
GPR98	0.415099	-1.26847	3.32848e-07	7.15308e-06
ST3GAL1	0.567285	-0.817855	3.33759e-07	7.16516e-06
CDC25A	1.46582	0.551703	3.34194e-07	7.16699e-06
TUBA1B	1.25652	0.329431	3.35762e-07	7.1931e-06
TTC8	0.753073	-0.409138	3.36736e-07	7.20644e-06
RAB11A	0.753262	-0.408776	3.40212e-07	7.27322e-06
DDX17	0.812587	-0.299406	3.41493e-07	7.29301e-06
SKA3	1.40247	0.487968	3.43427e-07	7.32667e-06
CLK1	0.740844	-0.432759	3.4411e-07	7.33361e-06
CPSF4	1.25074	0.322784	3.45609e-07	7.35791e-06
PAX6	1.94281	0.958147	3.46498e-07	7.36919e-06
CCDC110	1.77394	0.826958	3.47253e-07	7.3776e-06
TXN2	0.778783	-0.360707	3.48499e-07	7.39641e-06
SDC1	0.50541	-0.984473	3.49455e-07	7.40522e-06
NCRNA00094	1.30139	0.380055	3.50119e-07	7.40522e-06
TPMT	1.32055	0.401137	3.50205e-07	7.40522e-06
C10orf58	0.584909	-0.773716	3.50359e-07	7.40522e-06
IKBKAP	1.28391	0.36054	3.50841e-07	7.40777e-06
SENP2	1.27885	0.354845	3.51632e-07	7.41252e-06
AREG	3.2367	1.69452	3.51789e-07	7.41252e-06
ZNF846	0.646605	-0.629044	3.58563e-07	7.54748e-06
MGC12982	1.64672	0.719595	3.62512e-07	7.61956e-06
EFNB2	1.75553	0.81191	3.63377e-07	7.61956e-06
LOC284233	0.330718	-1.59633	3.63469e-07	7.61956e-06
MRPL37	1.27576	0.351355	3.63473e-07	7.61956e-06
PICK1	0.747332	-0.420179	3.65685e-07	7.65808e-06
C9orf25	1.36081	0.444464	3.69126e-07	7.72227e-06
APOO	1.29377	0.371579	3.74602e-07	7.82883e-06
CCL4L2	2.48844	1.31524	3.76659e-07	7.86382e-06
SAMD13	0.506915	-0.980183	3.8128e-07	7.95219e-06
ZNF720	0.747335	-0.420173	3.8329e-07	7.98599e-06
MRPL50	1.28034	0.356522	3.87421e-07	8.06387e-06
CLMN	1.81833	0.862617	3.89095e-07	8.08781e-06
WDR31	1.76221	0.817384	3.8936e-07	8.08781e-06
RPL13A	0.731008	-0.452041	3.90583e-07	8.105e-06
CHMP5	1.26581	0.340059	3.92926e-07	8.14536e-06
TSPAN4	1.7682	0.822278	3.98662e-07	8.24198e-06
MAP4K3	0.719586	-0.474761	3.98771e-07	8.24198e-06
PNCK	0.265143	-1.91516	3.98792e-07	8.24198e-06
SEMA3F	0.592908	-0.75412	3.99315e-07	8.24447e-06
PHIP	0.754544	-0.406322	4.00658e-07	8.26388e-06
PLAUR	1.80582	0.852656	4.01106e-07	8.2648e-06
TTC7A	1.43527	0.521321	4.03323e-07	8.30213e-06
MTFMT	0.829155	-0.270286	4.05193e-07	8.3273e-06
C6orf106	1.29767	0.375928	4.05358e-07	8.3273e-06
TCTEX1D2	1.61195	0.688805	4.09675e-07	8.40757e-06
LRRC41	0.826846	-0.274309	4.10246e-07	8.40887e-06
DTWD2	0.695755	-0.523349	4.10559e-07	8.40887e-06
ARFIP2	1.26494	0.33907	4.11618e-07	8.42215e-06
FAM13A	0.590491	-0.760013	4.15472e-07	8.48927e-06
ADAM20	0.684886	-0.546063	4.15727e-07	8.48927e-06
D4S234E	0.275516	-1.85979	4.1756e-07	8.51823e-06
UBAP1	1.28448	0.361184	4.26806e-07	8.6982e-06
CHD9	0.711124	-0.491828	4.27958e-07	8.71301e-06
SFRS12IP1	0.7602	-0.395548	4.28822e-07	8.72193e-06
MCM4	1.47613	0.561824	4.29641e-07	8.72992e-06
C20orf194	0.711106	-0.491864	4.39448e-07	8.92036e-06
DGCR2	0.784439	-0.350267	4.43039e-07	8.98437e-06
PRLR	2.9716	1.57124	4.44335e-07	9.00173e-06
KIAA1949	1.55071	0.632928	4.45578e-07	9.01801e-06
OBFC1	0.72359	-0.466756	4.46441e-07	9.02657e-06
KDELC1	1.50057	0.585506	4.47547e-07	9.04001e-06
MXD4	0.719916	-0.474099	4.48876e-07	9.05793e-06
ENTPD3	0.349557	-1.5164	4.50115e-07	9.074e-06
NDUFA10	0.80334	-0.315917	4.54898e-07	9.16141e-06
NUDT9	0.780131	-0.358212	4.59878e-07	9.25263e-06
MAFB	1.88695	0.916058	4.62333e-07	9.2929e-06
DOCK6	0.765781	-0.384996	4.63131e-07	9.29981e-06
C2orf63	0.635861	-0.653216	4.63918e-07	9.30651e-06
MICAL2	1.69065	0.757578	4.645e-07	9.30907e-06
SKA1	1.45065	0.536698	4.75097e-07	9.51216e-06
CYP20A1	0.801491	-0.319242	4.78253e-07	9.56599e-06
HIST1H2AC	1.68787	0.755204	4.7881e-07	9.56781e-06
GAPVD1	1.2633	0.337195	4.79488e-07	9.57202e-06
C9orf170	1.68259	0.750687	4.81665e-07	9.60613e-06
C10orf12	0.704864	-0.504584	4.84985e-07	9.66294e-06
PDCL	1.24122	0.311761	4.87612e-07	9.70584e-06
VTN	2.73506	1.45157	4.8997e-07	9.74332e-06
CDK16	1.25669	0.329633	4.95479e-07	9.83644e-06
RNF14	0.816362	-0.292718	4.95612e-07	9.83644e-06
ITFG3	0.76975	-0.377538	5.00756e-07	9.92892e-06
SNX10	1.69162	0.758402	5.0249e-07	9.95367e-06
EBP	1.34093	0.423236	5.11684e-07	1.0126e-05
SOX9	2.48909	1.31562	5.15053e-07	1.01499e-05
C1GALT1	1.42662	0.512605	5.15074e-07	1.01499e-05
LIAS	0.76359	-0.38913	5.15099e-07	1.01499e-05
NAA25	0.781821	-0.355089	5.15905e-07	1.01499e-05
MTX2	0.796185	-0.328825	5.15917e-07	1.01499e-05
EXOSC10	1.17994	0.238716	5.16036e-07	1.01499e-05
MON2	0.790265	-0.339592	5.16845e-07	1.01499e-05
RCOR3	0.774188	-0.369243	5.16852e-07	1.01499e-05
KIAA0232	0.75129	-0.412558	5.17767e-07	1.01582e-05
GUSB	1.36792	0.451981	5.20684e-07	1.02056e-05
PECR	1.60953	0.686641	5.25296e-07	1.02862e-05
C5orf43	0.822545	-0.281833	5.26693e-07	1.03037e-05
C1QTNF2	1.80249	0.849989	5.29713e-07	1.03529e-05
ZNF692	0.683819	-0.548314	5.31568e-07	1.03792e-05
HMGCS2	0.124829	-3.00197	5.32482e-07	1.03846e-05
GRSF1	0.825104	-0.277353	5.32857e-07	1.03846e-05
PCGF3	0.72721	-0.459557	5.34552e-07	1.04078e-05
EDARADD	0.53674	-0.897706	5.45651e-07	1.06138e-05
RALA	1.27106	0.346028	5.47293e-07	1.06356e-05
ROPN1L	1.69839	0.764168	5.47875e-07	1.06369e-05
BRCC3	1.31082	0.390471	5.51828e-07	1.07035e-05
WNK4	2.56427	1.35855	5.56266e-07	1.07794e-05
GALNTL1	2.48654	1.31414	5.57395e-07	1.0791e-05
SC4MOL	0.679097	-0.55831	5.74248e-07	1.11068e-05
CDCA7	1.70541	0.770118	5.84737e-07	1.1289e-05
PIKFYVE	0.752028	-0.411141	5.84768e-07	1.1289e-05
CCDC103	1.55665	0.638445	5.8692e-07	1.13098e-05
FUT4	1.65973	0.730953	5.86947e-07	1.13098e-05
MOBKL2B	1.91575	0.93791	5.89873e-07	1.13555e-05
SAPS2	0.806427	-0.310384	5.90522e-07	1.13573e-05
RACGAP1	1.38489	0.469766	5.94813e-07	1.14261e-05
CORO1B	0.764385	-0.387629	5.95215e-07	1.14261e-05
DNAJA4	0.625773	-0.676288	6.05719e-07	1.16169e-05
HESX1	1.60485	0.682441	6.07539e-07	1.16346e-05
SCD5	2.11968	1.08385	6.07778e-07	1.16346e-05
PPIL2	0.797396	-0.326631	6.10371e-07	1.16733e-05
RAPGEF1	1.37514	0.45958	6.13706e-07	1.17262e-05
SLC14A1	0.189816	-2.39733	6.15124e-07	1.17423e-05
ANPEP	2.48253	1.31181	6.1619e-07	1.17517e-05
MR1	0.68624	-0.543214	6.17754e-07	1.17706e-05
LAS1L	1.24018	0.310545	6.195e-07	1.17929e-05
BIRC3	2.23707	1.16161	6.2064e-07	1.18037e-05
GSTM2	0.252724	-1.98437	6.23764e-07	1.18521e-05
BLOC1S2	0.782405	-0.354013	6.30706e-07	1.19729e-05
NEURL1B	1.61574	0.692194	6.31919e-07	1.1984e-05
UPF3B	1.28498	0.361749	6.32717e-07	1.1984e-05
SH3PXD2A	0.651149	-0.618941	6.33224e-07	1.1984e-05
CCL7	2.40076	1.26349	6.33629e-07	1.1984e-05
SPEF1	1.93245	0.950433	6.3915e-07	1.20773e-05
PCBD1	0.692964	-0.529147	6.4134e-07	1.21075e-05
SERINC4	0.593819	-0.751905	6.56385e-07	1.23801e-05
C3orf34	1.49544	0.580571	6.57542e-07	1.23906e-05
AMOTL1	1.68435	0.752196	6.63725e-07	1.24956e-05
MAOA	0.355735	-1.49113	6.71555e-07	1.26314e-05
HAT1	1.24678	0.318207	6.73664e-07	1.26594e-05
RRM2	1.4737	0.559444	6.76132e-07	1.26907e-05
PTRH1	1.42626	0.512234	6.76562e-07	1.26907e-05
SOCS1	1.9075	0.931683	6.78851e-07	1.27188e-05
PLCL2	1.94249	0.957908	6.79303e-07	1.27188e-05
TRIM2	0.52822	-0.920788	6.85976e-07	1.2832e-05
FN3KRP	1.26634	0.340661	6.93677e-07	1.2949e-05
C6orf105	2.79773	1.48426	6.94088e-07	1.2949e-05
PIWIL4	1.90563	0.930266	6.94123e-07	1.2949e-05
RPS2	0.731106	-0.451848	7.03822e-07	1.3118e-05
TBX1	0.297854	-1.74732	7.0648e-07	1.31555e-05
WDYHV1	1.30022	0.378756	7.08515e-07	1.31815e-05
UBE2Q2P1	0.597259	-0.743571	7.09875e-07	1.31948e-05
ZC3H13	0.747996	-0.418898	7.14448e-07	1.32606e-05
C9orf98	1.88814	0.916968	7.14711e-07	1.32606e-05
STK19	1.26966	0.344444	7.18316e-07	1.33155e-05
DNAJB11	1.2226	0.289947	7.19098e-07	1.33179e-05
CCL4	2.49845	1.32103	7.21987e-07	1.33594e-05
SLC22A4	1.67176	0.741365	7.29571e-07	1.34875e-05
TMEM178	0.464737	-1.10551	7.34599e-07	1.35682e-05
FASTKD2	0.81921	-0.287695	7.44889e-07	1.37459e-05
KIAA0430	0.804151	-0.314462	7.4617e-07	1.37572e-05
NLRP11	1.64485	0.717952	7.49701e-07	1.38099e-05
HES1	0.638628	-0.646953	7.50961e-07	1.38206e-05
KDELC2	1.53146	0.614906	7.57036e-07	1.392e-05
TTC9C	1.22942	0.297979	7.6708e-07	1.4092e-05
ZNF480	0.724489	-0.464964	7.80111e-07	1.43186e-05
CNOT10	1.22914	0.297651	7.82427e-07	1.43482e-05
C6orf27	1.9397	0.955835	7.85892e-07	1.43989e-05
MT1A	2.54742	1.34904	7.91041e-07	1.44803e-05
ABCF1	1.21746	0.283869	8.05042e-07	1.47234e-05
SEMA4G	0.530377	-0.91491	8.1072e-07	1.48141e-05
CSPG5	1.97588	0.982494	8.16181e-07	1.49006e-05
SLCO6A1	0.512627	-0.964019	8.22568e-07	1.50018e-05
STX1B	1.94893	0.962683	8.23469e-07	1.50018e-05
CANT1	1.26446	0.33852	8.23918e-07	1.50018e-05
POLR3F	1.24288	0.313686	8.28584e-07	1.50733e-05
BRPF1	1.26517	0.339329	8.3356e-07	1.51439e-05
KIF18B	1.44723	0.53329	8.33939e-07	1.51439e-05
LOC339674	1.69383	0.760289	8.35418e-07	1.51573e-05
RNASEH1	1.27996	0.356097	8.44247e-07	1.53039e-05
ZNF319	0.752473	-0.410288	8.49535e-07	1.53862e-05
ARFGEF1	0.78043	-0.357658	8.5454e-07	1.54632e-05
KLF3	0.751418	-0.412313	8.64421e-07	1.5623e-05
UGT1A8	0.197068	-2.34324	8.64895e-07	1.5623e-05
BBS5	0.753605	-0.408119	8.65829e-07	1.56261e-05
SNAPC4	1.30999	0.389561	8.70045e-07	1.56765e-05
ENKUR	1.92973	0.9484	8.70386e-07	1.56765e-05
NCKAP5	0.454736	-1.1369	8.70915e-07	1.56765e-05
ZMYM6	0.831419	-0.266352	8.72585e-07	1.56928e-05
CHD3	0.739626	-0.435132	8.78286e-07	1.57814e-05
ABHD8	1.46378	0.5497	8.84931e-07	1.5881e-05
PIPSL	1.25313	0.32554	8.85375e-07	1.5881e-05
ACVR2A	0.678754	-0.559039	8.89469e-07	1.59405e-05
ANKRD36B	1.82809	0.870335	8.90986e-07	1.59537e-05
LTBR	0.787171	-0.345251	8.99666e-07	1.60951e-05
RARRES3	2.58355	1.36936	9.02729e-07	1.61358e-05
C9orf37	1.33339	0.415101	9.15011e-07	1.63411e-05
CMIP	0.732947	-0.448219	9.18764e-07	1.63938e-05
SIK3	1.30828	0.38767	9.29464e-07	1.65703e-05
RBM17	1.28028	0.356456	9.34696e-07	1.664e-05
GPR37	2.62245	1.39091	9.35002e-07	1.664e-05
INO80D	0.769307	-0.378369	9.35807e-07	1.664e-05
MAPRE1	1.21972	0.286552	9.59942e-07	1.70544e-05
EXOC1	0.828881	-0.270763	9.62649e-07	1.70877e-05
WASL	0.781746	-0.355227	9.64955e-07	1.71012e-05
CLCA3P	0.468492	-1.0939	9.65081e-07	1.71012e-05
IL27RA	1.83045	0.872195	9.65984e-07	1.71024e-05
ATAD2	1.4302	0.516214	9.727e-07	1.72065e-05
TMC7	0.48181	-1.05346	9.8217e-07	1.7359e-05
SPIN4	1.70258	0.767727	9.89756e-07	1.7478e-05
CENPI	1.58428	0.663829	9.95574e-07	1.75656e-05
SENP7	0.715617	-0.48274	1.00977e-06	1.78008e-05
GALNT7	0.661332	-0.596553	1.01823e-06	1.79346e-05
CDKN2D	1.37503	0.459463	1.02828e-06	1.80932e-05
MICB	1.83116	0.87276	1.029e-06	1.80932e-05
APLP1	2.30373	1.20397	1.03249e-06	1.81389e-05
TSPAN12	0.441651	-1.17902	1.04725e-06	1.83825e-05
CCNT2	0.690248	-0.534814	1.05897e-06	1.85585e-05
FAM50A	1.30512	0.384181	1.05909e-06	1.85585e-05
PLCD3	0.539665	-0.889865	1.06838e-06	1.87053e-05
CLK3	0.801241	-0.319692	1.07477e-06	1.88011e-05
ID1	0.476097	-1.07067	1.09223e-06	1.90903e-05
GNG10	1.30746	0.386762	1.09967e-06	1.92004e-05
ALOX12P2	0.383946	-1.38102	1.10041e-06	1.92004e-05
STOX1	2.07984	1.05647	1.11375e-06	1.94113e-05
C2orf50	1.62337	0.698995	1.11438e-06	1.94113e-05
TCF25	0.811461	-0.301406	1.11719e-06	1.94437e-05
BRIX1	1.28393	0.360571	1.12224e-06	1.94901e-05
KIAA0195	0.753889	-0.407576	1.1227e-06	1.94901e-05
SRR	1.35557	0.4389	1.12271e-06	1.94901e-05
NOL8	1.25448	0.327089	1.13254e-06	1.96442e-05
SSX2IP	1.33378	0.415522	1.13788e-06	1.97201e-05
NAA16	0.738975	-0.436402	1.16188e-06	2.0119e-05
ALDH1L1	0.256111	-1.96516	1.17188e-06	2.02751e-05
TSGA14	0.567845	-0.816432	1.17603e-06	2.03297e-05
PRKD3	1.30209	0.380827	1.18543e-06	2.04749e-05
C18orf56	1.67017	0.739993	1.18874e-06	2.05147e-05
FAM174A	0.775342	-0.367095	1.19103e-06	2.0537e-05
GLUD1	0.797947	-0.325634	1.19337e-06	2.056e-05
KCNE1	1.80617	0.852934	1.19588e-06	2.0586e-05
TAF1C	0.766364	-0.383898	1.20333e-06	2.06968e-05
SMAD6	0.51907	-0.945999	1.22715e-06	2.10888e-05
GMEB1	1.24052	0.31095	1.23019e-06	2.11235e-05
LRIT3	0.607774	-0.718393	1.23557e-06	2.1198e-05
C15orf17	0.705394	-0.503498	1.23958e-06	2.1249e-05
SETD1B	0.800488	-0.321048	1.24108e-06	2.12569e-05
IGF2BP2	3.04374	1.60584	1.24307e-06	2.12734e-05
PHC2	1.27507	0.350576	1.24784e-06	2.13372e-05
LRFN2	0.350299	-1.51334	1.25141e-06	2.13803e-05
PLA2G6	0.639259	-0.645529	1.25298e-06	2.13894e-05
LOC149134	0.41035	-1.28507	1.25768e-06	2.14518e-05
SLC23A2	0.643928	-0.635028	1.2678e-06	2.16063e-05
FAM83D	1.45888	0.544857	1.27479e-06	2.17074e-05
NPEPL1	0.728581	-0.45684	1.27687e-06	2.17137e-05
TEF	0.739285	-0.435798	1.27728e-06	2.17137e-05
FANCA	1.40293	0.488441	1.28214e-06	2.17722e-05
WFDC13	0.493653	-1.01843	1.28284e-06	2.17722e-05
ANKRD46	0.751162	-0.412804	1.29392e-06	2.19421e-05
SAMHD1	1.78548	0.836311	1.29641e-06	2.1966e-05
CETN2	1.20883	0.27361	1.30378e-06	2.20728e-05
KIAA1432	1.39431	0.479553	1.32054e-06	2.23211e-05
FLJ42875	2.02391	1.01715	1.32062e-06	2.23211e-05
NOG	2.4109	1.26957	1.32183e-06	2.23231e-05
CDV3	1.27071	0.345635	1.32815e-06	2.24113e-05
POLR3B	0.784129	-0.350836	1.34779e-06	2.27239e-05
CDKN2C	1.62753	0.702683	1.35294e-06	2.2792e-05
DPH3	1.27111	0.346093	1.36213e-06	2.29281e-05
PTPMT1	1.2403	0.310692	1.36895e-06	2.30151e-05
WIPF3	2.03432	1.02455	1.36954e-06	2.30151e-05
RBM7	1.29533	0.373317	1.37552e-06	2.30933e-05
FAM188B	1.38252	0.467296	1.37645e-06	2.30933e-05
DPF1	2.21448	1.14697	1.38099e-06	2.31504e-05
KRT81	3.22955	1.69133	1.40214e-06	2.34859e-05
WRAP53	1.34336	0.425848	1.4151e-06	2.36812e-05
RNF115	1.27124	0.346232	1.41611e-06	2.36812e-05
C20orf70	0.58296	-0.77853	1.42414e-06	2.37961e-05
DCAF12	1.27542	0.350975	1.44757e-06	2.41679e-05
GAS1	2.82211	1.49677	1.45024e-06	2.41926e-05
CYB5R1	0.662396	-0.594235	1.47106e-06	2.452e-05
HTR2C	0.328611	-1.60555	1.47404e-06	2.45379e-05
MCM10	1.50607	0.590793	1.47452e-06	2.45379e-05
TMEM19	0.738464	-0.4374	1.47578e-06	2.45389e-05
TMED8	1.19309	0.2547	1.47747e-06	2.45471e-05
LRRC42	1.32664	0.407774	1.48012e-06	2.45545e-05
DGKH	0.632267	-0.661394	1.48031e-06	2.45545e-05
FBXL17	0.761749	-0.392612	1.49053e-06	2.4704e-05
POLR3C	1.22426	0.29191	1.49902e-06	2.48246e-05
CNIH2	1.90014	0.926102	1.50264e-06	2.48645e-05
2021-09-02	0.812567	-0.299441	1.50765e-06	2.49273e-05
FLYWCH1	0.760116	-0.395709	1.5168e-06	2.50583e-05
KLK5	5.31749	2.41074	1.525e-06	2.51736e-05
DIAPH1	1.29424	0.372104	1.5383e-06	2.53726e-05
SEC61B	1.25181	0.324015	1.54368e-06	2.54409e-05
EDN1	2.08181	1.05784	1.57951e-06	2.60106e-05
FAM183A	0.518579	-0.947364	1.58245e-06	2.60381e-05
GPD1L	0.546026	-0.872958	1.58945e-06	2.61323e-05
NAPEPLD	0.779791	-0.358841	1.60466e-06	2.6341e-05
NT5DC3	1.42316	0.509095	1.60472e-06	2.6341e-05
ADAR	1.25803	0.331165	1.62179e-06	2.65999e-05
SREBF2	0.751226	-0.412681	1.62713e-06	2.66662e-05
RAC3	1.70544	0.770142	1.62917e-06	2.66782e-05
ADORA1	1.94137	0.957077	1.63155e-06	2.6696e-05
MTHFD1	1.27752	0.353344	1.64029e-06	2.68175e-05
GALNT4	0.710394	-0.493308	1.65098e-06	2.69708e-05
SLC45A3	0.597327	-0.743408	1.65233e-06	2.69714e-05
TFCP2	0.803947	-0.314829	1.6545e-06	2.69853e-05
ZBTB7C	0.34578	-1.53207	1.66322e-06	2.70967e-05
MAPK10	0.46198	-1.1141	1.66397e-06	2.70967e-05
CXorf58	1.34913	0.432024	1.66604e-06	2.71037e-05
CLCA2	0.180609	-2.46906	1.66704e-06	2.71037e-05
ADH7	0.206217	-2.27777	1.6754e-06	2.72179e-05
CCDC34	1.34287	0.425323	1.68793e-06	2.73998e-05
HPS5	1.34813	0.430956	1.70668e-06	2.76823e-05
MSMB	0.293419	-1.76897	1.72979e-06	2.80211e-05
RARRES1	3.1845	1.67107	1.7303e-06	2.80211e-05
FAM160B2	0.766343	-0.383938	1.73526e-06	2.80791e-05
NLRP1	0.589736	-0.76186	1.74071e-06	2.81452e-05
PIGN	0.735515	-0.443174	1.74242e-06	2.81507e-05
GREB1L	2.58561	1.37051	1.74761e-06	2.82121e-05
FNDC3A	0.69952	-0.515564	1.75309e-06	2.82785e-05
LOC642587	0.333316	-1.58504	1.7553e-06	2.82919e-05
RASGEF1B	1.87827	0.909403	1.75928e-06	2.83337e-05
SLC16A5	0.498217	-1.00515	1.76641e-06	2.84262e-05
SETX	1.27401	0.349374	1.77483e-06	2.85393e-05
GPR107	1.28952	0.366834	1.77707e-06	2.85529e-05
ZC3H7B	0.792588	-0.335358	1.79145e-06	2.87614e-05
TAS2R4	0.678864	-0.558807	1.80565e-06	2.89666e-05
CD72	1.89243	0.92024	1.81807e-06	2.91432e-05
MED10	1.32054	0.401131	1.81987e-06	2.91492e-05
TOPORS	1.28213	0.358547	1.82416e-06	2.91629e-05
PDRG1	1.31004	0.38961	1.82451e-06	2.91629e-05
AMOTL2	1.58306	0.66272	1.82785e-06	2.91629e-05
WDR53	1.24746	0.31899	1.82818e-06	2.91629e-05
PTPN3	1.36445	0.448316	1.82862e-06	2.91629e-05
TMEM14B	1.299	0.377402	1.82926e-06	2.91629e-05
EID1	0.812173	-0.300141	1.83433e-06	2.9221e-05
FAM124A	1.79259	0.842043	1.83704e-06	2.9238e-05
KIAA0174	0.822452	-0.281997	1.83825e-06	2.9238e-05
PAPD4	0.83191	-0.265501	1.84152e-06	2.92674e-05
DHDH	2.03446	1.02465	1.84502e-06	2.93003e-05
SMC1B	2.49749	1.32048	1.84832e-06	2.93151e-05
CDKN1C	1.91226	0.93528	1.84882e-06	2.93151e-05
SESN1	0.718232	-0.477478	1.90746e-06	3.02216e-05
SFRS8	0.839085	-0.253111	1.91674e-06	3.03452e-05
CXCL3	2.49155	1.31704	1.91896e-06	3.0357e-05
SYNGR4	1.64451	0.717661	1.92496e-06	3.0407e-05
NSUN6	0.70888	-0.496386	1.9251e-06	3.0407e-05
RBM18	1.25613	0.328984	1.92771e-06	3.04249e-05
SMC1A	1.29303	0.370757	1.9345e-06	3.05086e-05
TDRKH	1.58323	0.662874	1.93737e-06	3.05303e-05
OPTN	1.47765	0.563303	1.94663e-06	3.06526e-05
FAM19A3	1.88701	0.916105	1.95249e-06	3.07127e-05
NUP62CL	1.81323	0.858559	1.95343e-06	3.07127e-05
SLC16A1	2.50124	1.32264	1.95836e-06	3.07666e-05
IFRD1	1.33004	0.411467	1.96623e-06	3.08665e-05
SGOL1	1.48476	0.570228	1.98326e-06	3.111e-05
LAG3	2.51752	1.332	1.98517e-06	3.11162e-05
YKT6	1.26712	0.341558	2.00113e-06	3.13424e-05
KIAA0415	1.26513	0.33929	2.00405e-06	3.13642e-05
FAM13AOS	0.627304	-0.672763	2.01239e-06	3.14471e-05
ZNF410	1.15784	0.211435	2.01242e-06	3.14471e-05
POLD1	1.29792	0.376199	2.01473e-06	3.14592e-05
GCLC	0.58363	-0.776875	2.02404e-06	3.15805e-05
ELF1	0.722383	-0.469165	2.05985e-06	3.21149e-05
2021-03-04	2.56213	1.35735	2.06171e-06	3.21195e-05
HHAT	0.657628	-0.604657	2.06787e-06	3.21478e-05
NUDT5	1.32383	0.404713	2.06984e-06	3.21478e-05
MRPL17	1.24255	0.313306	2.0705e-06	3.21478e-05
CEP76	1.33201	0.413603	2.07122e-06	3.21478e-05
BTRC	0.80533	-0.312347	2.07137e-06	3.21478e-05
ZFHX3	0.658741	-0.602216	2.08358e-06	3.23128e-05
WISP3	0.270455	-1.88654	2.09626e-06	3.24849e-05
TOLLIP	0.76286	-0.39051	2.11885e-06	3.28101e-05
BEX4	0.529293	-0.917862	2.12154e-06	3.2827e-05
PHF16	1.34973	0.432676	2.13026e-06	3.29182e-05
UGT1A7	0.313165	-1.67501	2.13064e-06	3.29182e-05
ATP10B	0.292481	-1.77358	2.15194e-06	3.32222e-05
HPS4	0.774238	-0.369152	2.18066e-06	3.36403e-05
RCAN1	1.52091	0.604936	2.1903e-06	3.37635e-05
C1orf216	1.30305	0.381889	2.20581e-06	3.3965e-05
CCL3L1	2.16844	1.11666	2.20668e-06	3.3965e-05
CFL2	1.56351	0.644793	2.22238e-06	3.41809e-05
NPC1	1.42663	0.512611	2.2241e-06	3.41818e-05
ACOT9	1.50001	0.584976	2.23091e-06	3.42607e-05
FRY	0.478852	-1.06235	2.25588e-06	3.46021e-05
SIPA1L2	0.573427	-0.802317	2.25651e-06	3.46021e-05
DNAJB3	0.55979	-0.837043	2.2583e-06	3.46037e-05
SLC25A3	0.824711	-0.278039	2.26116e-06	3.46216e-05
TSPYL5	0.409328	-1.28867	2.26574e-06	3.46658e-05
OVGP1	0.50435	-0.987503	2.31261e-06	3.53565e-05
SNX30	1.37455	0.458961	2.31447e-06	3.53586e-05
PCDHB14	0.613534	-0.704784	2.32388e-06	3.54532e-05
NCRNA00152	1.828	0.870263	2.32412e-06	3.54532e-05
IPPK	1.52281	0.606732	2.33299e-06	3.5562e-05
ZNF264	0.770701	-0.375756	2.33685e-06	3.55945e-05
EBPL	0.624999	-0.678074	2.35668e-06	3.58698e-05
DUSP14	1.41435	0.500141	2.36632e-06	3.59898e-05
ADD1	0.828021	-0.272261	2.37271e-06	3.60603e-05
ACSBG1	0.439653	-1.18556	2.37746e-06	3.61056e-05
PADI3	0.192355	-2.37815	2.43929e-06	3.70173e-05
ABCA5	0.615532	-0.700095	2.44311e-06	3.70478e-05
PTPRB	0.661575	-0.596024	2.44712e-06	3.70812e-05
TOP1MT	0.712666	-0.488703	2.45023e-06	3.71009e-05
PLSCR1	1.40931	0.494988	2.46097e-06	3.7236e-05
PLA2G7	1.9929	0.994872	2.46502e-06	3.72699e-05
SURF1	1.28587	0.362749	2.47749e-06	3.74307e-05
CSF2RA	2.28482	1.19208	2.49145e-06	3.76048e-05
MTCH1	1.21719	0.283555	2.49268e-06	3.76048e-05
RAD51AP1	1.44123	0.527299	2.50467e-06	3.77477e-05
PRPF38A	1.17317	0.230415	2.50583e-06	3.77477e-05
CSTA	0.43373	-1.20513	2.5107e-06	3.77932e-05
PDXDC2	0.634566	-0.656157	2.52054e-06	3.79134e-05
TTLL11	1.38797	0.472979	2.52391e-06	3.79363e-05
POU6F1	1.54639	0.628905	2.53355e-06	3.80534e-05
RAB31	1.74029	0.799328	2.54642e-06	3.82187e-05
C12orf75	2.04557	1.0325	2.57484e-06	3.86169e-05
ACY1	0.686155	-0.543393	2.57887e-06	3.86491e-05
TRIOBP	0.744342	-0.425963	2.58679e-06	3.87173e-05
INPP5A	0.746346	-0.422083	2.5872e-06	3.87173e-05
TRPV4	0.525121	-0.929279	2.61203e-06	3.90605e-05
SPRED2	0.73566	-0.442889	2.63295e-06	3.93043e-05
FBXO43	1.70405	0.768969	2.63356e-06	3.93043e-05
FSD1	2.7987	1.48476	2.63409e-06	3.93043e-05
RNASEN	1.27612	0.351761	2.65299e-06	3.95575e-05
E2F2	1.60752	0.684833	2.67958e-06	3.99249e-05
MYBL1	1.60304	0.680808	2.69478e-06	4.01223e-05
TRMU	0.768285	-0.380286	2.70769e-06	4.02853e-05
ITGB3BP	1.27457	0.350006	2.71362e-06	4.03442e-05
WDFY3	0.763098	-0.39006	2.72868e-06	4.05387e-05
DECR1	0.737856	-0.438589	2.74262e-06	4.07163e-05
REL	0.547843	-0.868166	2.75067e-06	4.08063e-05
STK32A	0.382878	-1.38504	2.78216e-06	4.12436e-05
MTMR7	0.691307	-0.532601	2.78777e-06	4.12969e-05
GDPD2	0.285107	-1.81043	2.80659e-06	4.15457e-05
GDI1	1.23009	0.298767	2.83734e-06	4.19706e-05
GSN	1.51442	0.598767	2.85599e-06	4.2216e-05
E2F3	1.55146	0.633623	2.86618e-06	4.2336e-05
FAM84A	0.371988	-1.42667	2.8938e-06	4.27132e-05
CHMP2A	0.759336	-0.39719	2.89874e-06	4.27553e-05
ATP5G3	0.802591	-0.317262	2.91509e-06	4.29656e-05
PLA2G16	2.4538	1.29502	2.92574e-06	4.30916e-05
SLC2A9	0.485695	-1.04188	2.93469e-06	4.31924e-05
KIAA0652	1.28604	0.362932	2.95632e-06	4.34796e-05
SMYD4	1.26781	0.342336	2.97928e-06	4.37858e-05
VPS39	0.840035	-0.251479	2.98843e-06	4.38888e-05
ESRP2	0.648719	-0.624335	3.01204e-06	4.42039e-05
ASAP2	1.3694	0.453544	3.03835e-06	4.45581e-05
YY1AP1	1.18943	0.250271	3.05e-06	4.46969e-05
TMPRSS4	0.250288	-1.99834	3.06759e-06	4.49226e-05
VASP	0.763372	-0.389542	3.09365e-06	4.5272e-05
CCDC19	1.94168	0.957308	3.10698e-06	4.54346e-05
TLE1	1.63571	0.70992	3.12176e-06	4.56182e-05
LOC400027	0.72408	-0.465779	3.14269e-06	4.58913e-05
IFT140	0.663028	-0.592859	3.14734e-06	4.59265e-05
MRGPRX2	0.525507	-0.928218	3.16077e-06	4.60897e-05
C9orf125	0.420896	-1.24846	3.17069e-06	4.62015e-05
DAGLB	1.20839	0.273083	3.19678e-06	4.65485e-05
EIF4A3	1.17815	0.236525	3.20486e-06	4.66332e-05
MYST4	0.744103	-0.426425	3.20799e-06	4.66455e-05
C19orf38	1.76505	0.819707	3.2259e-06	4.68728e-05
KCNK13	2.14694	1.10228	3.23192e-06	4.69269e-05
HAUS2	1.20662	0.270972	3.24001e-06	4.70111e-05
PAX5	2.12314	1.0862	3.26123e-06	4.72616e-05
PDE7B	0.544772	-0.876275	3.26272e-06	4.72616e-05
COPS3	1.2839	0.360535	3.26419e-06	4.72616e-05
CYP2J2	0.441036	-1.18103	3.27647e-06	4.74023e-05
ATAD2B	0.761249	-0.393561	3.27853e-06	4.74023e-05
SNRPB	1.27398	0.349342	3.29678e-06	4.76326e-05
FAM174B	0.40799	-1.29339	3.30621e-06	4.77351e-05
TMEM117	0.689687	-0.535986	3.31151e-06	4.77781e-05
IL20	2.18592	1.12824	3.33818e-06	4.8129e-05
ISCA1P1	1.26834	0.342943	3.35724e-06	4.83697e-05
TAF11	1.18768	0.248151	3.36054e-06	4.83833e-05
USP8	0.815316	-0.294568	3.39588e-06	4.88578e-05
IVL	0.25088	-1.99493	3.40105e-06	4.88979e-05
NDUFB10	0.779554	-0.35928	3.44268e-06	4.94616e-05
ACP5	1.66306	0.733844	3.46442e-06	4.97392e-05
RFC5	1.26894	0.343624	3.4677e-06	4.97515e-05
TEX10	1.29424	0.372104	3.48866e-06	5.00171e-05
STK36	0.716931	-0.480095	3.50517e-06	5.02187e-05
FGGY	0.703191	-0.508012	3.53657e-06	5.06333e-05
ANKRD36	1.65977	0.730987	3.54671e-06	5.07221e-05
SLC39A8	1.62383	0.699403	3.54943e-06	5.07221e-05
KRTCAP3	0.378338	-1.40225	3.5502e-06	5.07221e-05
DSCC1	1.40357	0.489105	3.57062e-06	5.09556e-05
IFNG	2.40361	1.2652	3.57152e-06	5.09556e-05
C2orf60	0.820412	-0.28558	3.57476e-06	5.09664e-05
NRIP3	1.66421	0.734833	3.57951e-06	5.09988e-05
SYNE2	1.45857	0.544558	3.59847e-06	5.12332e-05
MLF1IP	1.36305	0.446839	3.6453e-06	5.18316e-05
RABL5	1.22931	0.297844	3.64556e-06	5.18316e-05
GPS2	1.24464	0.315727	3.65064e-06	5.18679e-05
FAM83C	0.291265	-1.7796	3.67038e-06	5.21122e-05
EVL	1.48951	0.574843	3.67334e-06	5.21183e-05
SERPINB9	1.90142	0.92708	3.71482e-06	5.26703e-05
TRNAU1AP	1.25651	0.329418	3.77189e-06	5.34425e-05
TINF2	1.22063	0.287624	3.77978e-06	5.35172e-05
AKTIP	0.781851	-0.355034	3.78743e-06	5.35669e-05
CDK18	0.632118	-0.661735	3.78851e-06	5.35669e-05
SRD5A1	1.50197	0.586854	3.81894e-06	5.39599e-05
CNOT1	0.820765	-0.284959	3.84587e-06	5.42943e-05
SLC31A1	1.28864	0.365853	3.8479e-06	5.42943e-05
UGT1A6	0.263336	-1.92502	3.8738e-06	5.46222e-05
TAF12	1.20825	0.272915	3.88077e-06	5.46829e-05
PDZK1IP1	3.47195	1.79574	3.9206e-06	5.52062e-05
USO1	0.810384	-0.303322	3.96662e-06	5.58158e-05
NDUFB8	0.796066	-0.32904	3.97838e-06	5.59429e-05
IL4I1	1.86108	0.896136	4.0132e-06	5.63938e-05
PMPCA	1.27426	0.349656	4.03677e-06	5.66862e-05
BBS2	0.802516	-0.317397	4.05317e-06	5.68775e-05
TICAM2	1.66615	0.736519	4.08628e-06	5.7303e-05
ST6GALNAC6	1.33537	0.417244	4.09028e-06	5.73198e-05
ST3GAL5	0.492727	-1.02114	4.0982e-06	5.73916e-05
JMJD6	1.20697	0.271388	4.11813e-06	5.76313e-05
PHLDA3	0.671895	-0.573692	4.13295e-06	5.77993e-05
VMO1	1.97682	0.983182	4.13966e-06	5.78536e-05
BCAS2	1.17845	0.236886	4.16844e-06	5.82161e-05
GTF3C4	1.44345	0.529525	4.1828e-06	5.8377e-05
HOXA1	0.632166	-0.661625	4.21286e-06	5.87565e-05
C5	1.67709	0.745963	4.22187e-06	5.88271e-05
DAXX	1.15993	0.214042	4.22366e-06	5.88271e-05
EMD	1.21996	0.286832	4.22899e-06	5.88614e-05
MYL12A	1.28547	0.3623	4.24812e-06	5.90875e-05
TNRC6B	0.794476	-0.331925	4.28423e-06	5.95202e-05
C3orf58	0.619489	-0.69085	4.28504e-06	5.95202e-05
TNRC6A	0.782459	-0.353913	4.32879e-06	6.00872e-05
ACYP1	1.34677	0.429507	4.39526e-06	6.09686e-05
CCDC123	1.27933	0.355392	4.40854e-06	6.10709e-05
ZNF132	0.656695	-0.606704	4.40864e-06	6.10709e-05
METTL7A	0.478974	-1.06198	4.41157e-06	6.10709e-05
RGP1	1.52289	0.606809	4.42706e-06	6.1244e-05
KTI12	1.20444	0.268367	4.43125e-06	6.12606e-05
MLL2	0.758596	-0.398596	4.46338e-06	6.16632e-05
PTPRR	0.33015	-1.59881	4.50479e-06	6.21934e-05
TCN2	1.65155	0.723816	4.53658e-06	6.25555e-05
ACO1	1.40812	0.493766	4.53712e-06	6.25555e-05
ECM1	1.83525	0.875976	4.54904e-06	6.26777e-05
FNDC4	1.84592	0.884337	4.55253e-06	6.26837e-05
MPP2	1.85613	0.892298	4.55994e-06	6.27435e-05
STIM1	1.31776	0.398085	4.56689e-06	6.2797e-05
IFNA1	1.29236	0.370008	4.61067e-06	6.33566e-05
C6orf182	1.27818	0.354086	4.6159e-06	6.33859e-05
DUSP28	0.761631	-0.392836	4.62382e-06	6.34521e-05
RTN4RL1	2.60591	1.38179	4.65497e-06	6.38369e-05
GPR172B	0.442299	-1.17691	4.69736e-06	6.43752e-05
TTC26	1.33305	0.414727	4.72958e-06	6.47735e-05
CYB5B	0.76193	-0.392271	4.74541e-06	6.49469e-05
TNFRSF1B	1.68409	0.751967	4.75929e-06	6.50934e-05
TMC4	0.472229	-1.08244	4.77022e-06	6.51994e-05
DTNBP1	1.27754	0.353369	4.7774e-06	6.52541e-05
SLC24A1	0.746353	-0.42207	4.79841e-06	6.54974e-05
EHMT1	1.20967	0.274617	4.8129e-06	6.56514e-05
NR6A1	1.55452	0.636469	4.82752e-06	6.58071e-05
HLA-DMB	2.03599	1.02573	4.86431e-06	6.6261e-05
XRCC6	0.842848	-0.246656	4.86828e-06	6.6261e-05
CISH	1.45684	0.542841	4.87052e-06	6.6261e-05
FAM40B	1.71828	0.780963	4.87643e-06	6.62975e-05
UBE2S	1.42623	0.512206	4.89731e-06	6.65372e-05
MMP9	2.92549	1.54868	4.92488e-06	6.68305e-05
MSLNL	1.29503	0.372982	4.928e-06	6.68305e-05
NME6	1.22524	0.293067	4.93124e-06	6.68305e-05
SLC25A1	0.743062	-0.428446	4.93194e-06	6.68305e-05
LOC90834	0.599314	-0.738615	4.95978e-06	6.71634e-05
CCND3	1.34209	0.424483	4.98851e-06	6.75079e-05
ETFA	0.808828	-0.306095	5.02464e-06	6.79384e-05
KDELR3	1.72604	0.787469	5.02695e-06	6.79384e-05
SMPD1	1.36588	0.449835	5.10999e-06	6.90152e-05
LOC285954	1.48441	0.569893	5.11742e-06	6.90701e-05
KIAA1530	0.731428	-0.451212	5.14579e-06	6.94072e-05
CCNB2	1.4015	0.486972	5.14933e-06	6.94093e-05
IFI6	2.18362	1.12672	5.17205e-06	6.96698e-05
TRIM69	1.57001	0.650771	5.17668e-06	6.96863e-05
DCAF5	0.829	-0.270556	5.21972e-06	7.02196e-05
APIP	1.30469	0.383706	5.23638e-06	7.03551e-05
P2RX7	1.94004	0.956084	5.23665e-06	7.03551e-05
HK3	2.37324	1.24686	5.24356e-06	7.03651e-05
TSPO	0.696778	-0.521229	5.24426e-06	7.03651e-05
GSTA1	0.209924	-2.25206	5.28399e-06	7.08517e-05
UBE2E2	2.0149	1.01071	5.29071e-06	7.08955e-05
NPAT	1.30683	0.386074	5.40892e-06	7.24153e-05
IKZF5	0.820882	-0.284754	5.41119e-06	7.24153e-05
BUB1	1.39395	0.479178	5.43472e-06	7.26588e-05
SLC26A6	1.3756	0.460066	5.43648e-06	7.26588e-05
RNF11	0.810206	-0.303639	5.44187e-06	7.26835e-05
POLR2D	1.21818	0.284728	5.48759e-06	7.32465e-05
PKIA	0.494909	-1.01476	5.53683e-06	7.38556e-05
ING1	1.2384	0.308474	5.5819e-06	7.44084e-05
TMEM192	0.76757	-0.38163	5.59158e-06	7.4489e-05
KRT15	0.304306	-1.7164	5.60016e-06	7.45549e-05
C6orf218	1.90535	0.930053	5.63232e-06	7.49343e-05
ITPK1	1.3134	0.393311	5.66855e-06	7.53675e-05
CCDC15	1.37355	0.457907	5.759e-06	7.65204e-05
SLAMF8	2.09069	1.06398	5.78803e-06	7.68564e-05
FOXD1	2.95243	1.5619	5.80982e-06	7.70957e-05
MORN4	0.716514	-0.480933	5.85576e-06	7.76551e-05
IL17RD	1.67691	0.745802	5.88925e-06	7.80487e-05
NXPH2	2.13743	1.09588	5.90886e-06	7.82581e-05
C2orf77	1.55991	0.641464	5.98641e-06	7.9234e-05
MIF	0.72124	-0.471449	6.01997e-06	7.96267e-05
B3GNT8	0.629103	-0.668632	6.05685e-06	8.00629e-05
CDKL1	1.66818	0.738272	6.06641e-06	8.01376e-05
PDHA1	1.23425	0.303631	6.07934e-06	8.02567e-05
ASAM	2.48402	1.31268	6.11585e-06	8.06867e-05
GSTM3	0.365916	-1.45042	6.15086e-06	8.10964e-05
VOPP1	1.35393	0.437148	6.15555e-06	8.11061e-05
LHX5	0.500227	-0.999345	6.1991e-06	8.16275e-05
MCM5	1.30571	0.38484	6.24142e-06	8.21319e-05
CST7	2.13601	1.09492	6.24924e-06	8.21821e-05
BAALC	0.365941	-1.45032	6.2765e-06	8.24877e-05
FCRL6	1.82724	0.869662	6.28477e-06	8.25435e-05
ZNF815	1.40359	0.48912	6.29374e-06	8.25616e-05
ADAMTS20	0.416611	-1.26323	6.29421e-06	8.25616e-05
IL18R1	1.67239	0.741907	6.33163e-06	8.29994e-05
SMARCE1	0.829319	-0.270001	6.35005e-06	8.31877e-05
GALNT6	1.80872	0.854968	6.37784e-06	8.34984e-05
AKR1C3	0.343047	-1.54352	6.4681e-06	8.4626e-05
LILRB5	2.26657	1.18051	6.51909e-06	8.52387e-05
SLC27A4	1.33385	0.415593	6.56932e-06	8.58306e-05
NCS1	1.49813	0.583166	6.57272e-06	8.58306e-05
TMEM169	1.81381	0.859021	6.619e-06	8.63798e-05
NCKAP5L	0.766607	-0.38344	6.66353e-06	8.69057e-05
FBXO45	1.26843	0.343049	6.68597e-06	8.71429e-05
FSTL4	0.317566	-1.65487	6.70101e-06	8.7256e-05
ACAD11	0.729778	-0.454471	6.70316e-06	8.7256e-05
MMEL1	0.423307	-1.24022	6.73266e-06	8.75844e-05
CNST	0.816456	-0.292554	6.78486e-06	8.81637e-05
DUOX2	0.31702	-1.65736	6.78579e-06	8.81637e-05
E2F6	1.17641	0.234391	6.80714e-06	8.8385e-05
SACM1L	0.818017	-0.289797	6.82955e-06	8.86199e-05
NIPSNAP3A	1.2559	0.328718	6.86526e-06	8.90269e-05
TAGLN2	1.42609	0.51207	6.89983e-06	8.94187e-05
ACP1	1.18897	0.24971	6.90609e-06	8.94433e-05
NUP160	1.28256	0.359031	6.94513e-06	8.9892e-05
NCAPG	1.36161	0.445315	7.01515e-06	9.0724e-05
HOXC5	0.485345	-1.04292	7.01825e-06	9.0724e-05
LRRC20	1.47158	0.557368	7.04271e-06	9.09827e-05
CXorf57	0.416446	-1.2638	7.11843e-06	9.19031e-05
TMCO3	1.38889	0.473936	7.13865e-06	9.21061e-05
SFRS2IP	0.807632	-0.30823	7.19073e-06	9.26629e-05
MTMR12	1.28822	0.365374	7.19085e-06	9.26629e-05
WDR70	1.2321	0.30112	7.21352e-06	9.28968e-05
DDX11L2	1.96249	0.972683	7.21945e-06	9.29148e-05
SAA1	3.94335	1.97942	7.34637e-06	9.44889e-05
F8	1.52655	0.610271	7.36063e-06	9.4613e-05
TMEM87A	0.833281	-0.263125	7.4229e-06	9.53535e-05
WSCD2	0.300734	-1.73344	7.47033e-06	9.59028e-05
NBR1	0.833976	-0.261923	7.52346e-06	9.65006e-05
VEGFC	1.82146	0.865095	7.52898e-06	9.65006e-05
ROGDI	0.764648	-0.387133	7.53102e-06	9.65006e-05
ZNF616	0.777393	-0.363285	7.56166e-06	9.68327e-05
C9orf93	1.51714	0.601354	7.60993e-06	9.739e-05
ALDH5A1	0.567986	-0.816073	7.625e-06	9.7522e-05
PLEKHN1	0.543189	-0.880475	7.64911e-06	9.77693e-05
PAQR5	2.19032	1.13114	7.67957e-06	9.80976e-05
C1orf112	1.35051	0.433506	7.68494e-06	9.8105e-05
LDHB	0.686092	-0.543526	7.71553e-06	9.84342e-05
MPP1	1.8021	0.849676	7.72078e-06	9.844e-05
KLRC3	1.88031	0.910968	7.74067e-06	9.86322e-05
IFIT2	1.98524	0.98931	7.81168e-06	9.94751e-05
THOC4	1.24157	0.312168	7.81716e-06	9.94832e-05
DBT	0.784894	-0.349431	7.84094e-06	9.97239e-05
LOC115110	0.553585	-0.853122	7.85673e-06	9.97694e-05
WFDC1	0.544106	-0.87804	7.85673e-06	9.97694e-05
RAD9B	1.3415	0.423843	7.85911e-06	9.97694e-05
HOXB1	0.666694	-0.584904	7.8673e-06	9.98115e-05
MT1H	2.23556	1.16064	7.93723e-06	0.000100636
NUDT16L1	0.793261	-0.334133	8.0463e-06	0.000101956
UNC5A	1.87991	0.910662	8.13179e-06	0.000102976
CPPED1	1.81793	0.862294	8.14522e-06	0.000103082
C9orf119	1.28887	0.366109	8.15984e-06	0.000103204
ENO3	1.67651	0.745457	8.19212e-06	0.000103493
PTK6	0.466646	-1.0996	8.1928e-06	0.000103493
CPM	1.81592	0.8607	8.22721e-06	0.000103863
P2RY6	2.24602	1.16737	8.23659e-06	0.000103918
SLC6A12	1.91397	0.936571	8.25368e-06	0.00010407
PTPN2	1.26161	0.335264	8.27259e-06	0.000104244
HSD3B7	1.49348	0.578673	8.33819e-06	0.000105006
CDCA3	1.38517	0.470064	8.34772e-06	0.000105017
DPY19L2P2	1.82316	0.866438	8.35078e-06	0.000105017
LOC100268168	1.43193	0.517966	8.35447e-06	0.000105017
GIGYF2	0.829026	-0.270511	8.3878e-06	0.000105337
ATXN7L3B	0.799404	-0.323003	8.39017e-06	0.000105337
SAMM50	0.808749	-0.306236	8.58033e-06	0.000107658
KDM1B	1.35207	0.435165	8.60251e-06	0.000107871
PALM2-AKAP2	1.71383	0.777227	8.62714e-06	0.000108113
EPSTI1	2.09003	1.06352	8.66918e-06	0.000108574
UBQLN1	1.23866	0.308775	8.67777e-06	0.000108615
TRIM31	0.258104	-1.95397	8.69466e-06	0.000108738
AKAP11	0.773366	-0.370778	8.70652e-06	0.000108738
SEC24B	0.818147	-0.289568	8.71097e-06	0.000108738
C1QTNF1	1.93803	0.954588	8.71146e-06	0.000108738
TMEM231	0.721013	-0.471904	8.71406e-06	0.000108738
PDE4DIP	1.35803	0.441512	8.72168e-06	0.000108766
TTLL6	1.81994	0.863891	8.72765e-06	0.000108775
CD99	1.52194	0.605909	8.83939e-06	0.0001101
CRIPAK	0.725938	-0.462081	8.85058e-06	0.000110153
PARP12	1.42965	0.515663	8.85435e-06	0.000110153
LRRFIP2	1.22345	0.290958	8.90212e-06	0.00011068
DEPDC1	1.47782	0.563468	8.90764e-06	0.000110681
HSF2BP	1.62737	0.702539	8.96824e-06	0.000111367
BEND6	1.84768	0.885714	9.02717e-06	0.000112031
TUBB4	1.53031	0.613827	9.05155e-06	0.000112265
LMBRD1	0.78587	-0.347637	9.06236e-06	0.000112332
RNF44	0.772967	-0.371521	9.07376e-06	0.000112405
S100P	0.292589	-1.77305	9.13431e-06	0.000113082
C2orf67	0.786199	-0.347033	9.13948e-06	0.000113082
METTL2A	1.18474	0.244574	9.20282e-06	0.000113798
HLA-DOB	2.00808	1.00582	9.33832e-06	0.000115396
TGFA	1.73618	0.795919	9.34334e-06	0.000115396
SPHAR	0.785544	-0.348236	9.35494e-06	0.00011547
ARPC3	0.823388	-0.280356	9.36419e-06	0.000115514
MYH10	1.49379	0.578979	9.38509e-06	0.000115702
REXO2	1.27644	0.35213	9.41049e-06	0.000115946
GALNT11	0.766872	-0.382942	9.41951e-06	0.000115987
SIRT4	1.48292	0.568442	9.52368e-06	0.0001172
GFPT2	2.82969	1.50064	9.52961e-06	0.000117202
CDSN	2.73313	1.45055	9.54087e-06	0.00011727
TRAK1	0.651766	-0.617575	9.58256e-06	0.000117712
RASSF4	1.77004	0.823783	9.60449e-06	0.000117911
SC5DL	0.655214	-0.609961	9.62326e-06	0.000118071
GCNT1	2.09892	1.06965	9.63448e-06	0.000118138
RNF128	0.349385	-1.51711	9.65985e-06	0.000118378
FXR2	1.21483	0.280752	9.72609e-06	0.000119118
PPP1R12A	0.796637	-0.328005	9.78758e-06	0.0001198
DERA	1.27912	0.355148	9.89715e-06	0.000121069
BNIP2	0.840586	-0.250532	9.90367e-06	0.000121076
CBX3	1.18908	0.249852	9.95279e-06	0.000121604
NRCAM	2.27325	1.18475	1.00253e-05	0.000122417
CCNA2	1.39362	0.47884	1.00744e-05	0.000122896
CHKB	0.761517	-0.393052	1.00765e-05	0.000122896
SRPK2	0.799006	-0.323722	1.01278e-05	0.000123449
VANGL2	0.449312	-1.15421	1.02293e-05	0.000124611
IKZF2	0.544013	-0.878288	1.02555e-05	0.000124856
SOLH	0.79083	-0.338561	1.02696e-05	0.000124954
IL32	2.11035	1.07748	1.02826e-05	0.000125038
ITPKA	1.83071	0.872402	1.03552e-05	0.000125846
PAN2	0.719992	-0.473947	1.04581e-05	0.000127021
PILRA	1.99483	0.996268	1.04756e-05	0.000127159
PLA2G12A	0.797862	-0.325789	1.04886e-05	0.000127241
PTTG1	1.40493	0.490497	1.05631e-05	0.000128068
SLC5A12	0.421944	-1.24488	1.05802e-05	0.0001282
C3orf35	0.655332	-0.609703	1.0592e-05	0.000128239
ACTR3B	0.739878	-0.434642	1.05958e-05	0.000128239
POLE4	1.29263	0.370308	1.06153e-05	0.000128399
CCBP2	2.93016	1.55098	1.07102e-05	0.000129469
GUCY1B2	0.473585	-1.0783	1.07925e-05	0.000130388
NUDT13	0.68065	-0.555016	1.08111e-05	0.000130468
TBX6	0.529708	-0.916731	1.08143e-05	0.000130468
TBCCD1	1.2035	0.267232	1.08182e-05	0.000130468
DULLARD	1.20229	0.26578	1.0892e-05	0.00013128
EHD3	0.655043	-0.610339	1.09057e-05	0.000131335
C14orf126	0.772242	-0.372875	1.09094e-05	0.000131335
CDH24	1.45629	0.5423	1.09582e-05	0.000131845
ANKK1	0.474053	-1.07688	1.09971e-05	0.000132198
LOC93622	0.720117	-0.473697	1.10004e-05	0.000132198
SPPL3	0.84742	-0.238851	1.10153e-05	0.0001323
KCNG2	1.49575	0.580872	1.11063e-05	0.000133315
GPR157	0.591755	-0.756927	1.11565e-05	0.000133839
IMP3	0.819026	-0.28802	1.12069e-05	0.000134365
BMP1	1.56188	0.643282	1.12496e-05	0.000134797
SCRN1	1.58476	0.664265	1.13381e-05	0.000135779
HAUS7	1.33306	0.41474	1.1357e-05	0.0001359
PRF1	2.24629	1.16754	1.13614e-05	0.0001359
MTRF1	0.747127	-0.420576	1.1453e-05	0.000136844
TMEM150B	2.16394	1.11366	1.14537e-05	0.000136844
APH1A	1.20594	0.270154	1.14845e-05	0.000137131
PKN1	1.54318	0.625902	1.15609e-05	0.000137957
LOC80054	0.544964	-0.875766	1.15671e-05	0.000137957
ZBED2	2.89436	1.53325	1.15895e-05	0.000138144
NCOA4	0.793292	-0.334076	1.16035e-05	0.00013823
OAZ3	1.50477	0.589541	1.16475e-05	0.000138674
CNKSR2	1.69315	0.75971	1.1693e-05	0.000139135
FAM102A	1.35096	0.433986	1.17123e-05	0.000139284
EIF4B	0.816161	-0.293074	1.17382e-05	0.000139511
BNIP3L	0.767641	-0.381497	1.17528e-05	0.000139604
C10orf76	0.854615	-0.226654	1.18346e-05	0.000140446
MPRIP	1.30214	0.38088	1.18374e-05	0.000140446
C18orf19	1.29548	0.373491	1.18724e-05	0.00014078
FAM120AOS	1.24295	0.313763	1.19131e-05	0.00014118
UGT1A1	0.302322	-1.72584	1.19417e-05	0.000141438
WDR26	0.837914	-0.255127	1.19736e-05	0.000141734
MON1B	0.816826	-0.291899	1.19899e-05	0.000141844
NCRNA00081	0.800604	-0.320839	1.20376e-05	0.000142327
COL4A3	2.29804	1.20041	1.21132e-05	0.000143139
GJB4	0.373089	-1.42241	1.21316e-05	0.000143273
ZNF746	0.815891	-0.293551	1.2167e-05	0.000143608
FLJ36031	1.60794	0.685213	1.22668e-05	0.000144703
KLF5	0.56384	-0.826642	1.22787e-05	0.00014476
ASAP1	1.41708	0.502917	1.22924e-05	0.000144838
PCMT1	1.22621	0.294207	1.23405e-05	0.000145321
ZNF224	0.727032	-0.459909	1.23636e-05	0.00014551
SSTR3	1.38797	0.472972	1.23797e-05	0.000145616
RNF38	1.274	0.34937	1.24597e-05	0.000146401
COQ9	0.829824	-0.269122	1.24608e-05	0.000146401
NPTN	0.803256	-0.316069	1.25457e-05	0.00014726
BACE1	1.45077	0.536817	1.25482e-05	0.00014726
ICK	0.765307	-0.38589	1.25702e-05	0.000147432
EPHA4	0.521137	-0.940267	1.25773e-05	0.000147432
HDAC9	2.02175	1.01561	1.26043e-05	0.000147664
BUD13	1.1892	0.249991	1.26702e-05	0.000148345
ISG20	1.71628	0.779289	1.26769e-05	0.000148345
SLC6A8	0.531935	-0.910679	1.27081e-05	0.000148626
EIF2AK2	1.3865	0.471447	1.27417e-05	0.000148934
CYP4F3	0.319531	-1.64597	1.2868e-05	0.000150325
LUC7L3	0.784522	-0.350114	1.28955e-05	0.00015056
DIAPH3	1.49979	0.584759	1.29045e-05	0.00015058
BIN1	1.83624	0.876756	1.29348e-05	0.000150847
PRDM16	2.17516	1.12112	1.29649e-05	0.000151113
EPAS1	0.702241	-0.509962	1.3152e-05	0.000153206
ATP5G2	0.808214	-0.30719	1.31896e-05	0.000153556
WIBG	0.796207	-0.328784	1.31996e-05	0.000153585
TRPC1	1.65749	0.729002	1.32142e-05	0.000153668
TMBIM4	0.796412	-0.328413	1.3262e-05	0.000154137
DEFB126	0.543781	-0.878903	1.33249e-05	0.000154781
NECAP2	1.20111	0.264368	1.33425e-05	0.000154896
ABHD3	1.33449	0.416291	1.33574e-05	0.000154982
ITIH5L	0.544852	-0.876064	1.33828e-05	0.000155188
DZIP1L	1.68846	0.755708	1.33977e-05	0.000155274
CIITA	2.12605	1.08818	1.34104e-05	0.000155279
PCMTD1	0.763231	-0.389808	1.34133e-05	0.000155279
IGFBP3	0.45854	-1.12488	1.34947e-05	0.000156133
PRPS1	1.29686	0.375018	1.35456e-05	0.000156634
CPVL	2.09664	1.06808	1.35843e-05	0.000156992
PLEKHA1	0.762374	-0.391429	1.3629e-05	0.000157362
ABCC4	0.59606	-0.746471	1.36361e-05	0.000157362
EIF2C4	0.770092	-0.376897	1.36409e-05	0.000157362
TRIM32	1.26783	0.342357	1.36469e-05	0.000157362
SIK2	1.24914	0.320936	1.36851e-05	0.000157713
MCHR1	1.89228	0.920122	1.37872e-05	0.000158741
CTSZ	1.44928	0.535331	1.3795e-05	0.000158741
PPT2	1.32523	0.406245	1.37975e-05	0.000158741
KLF14	1.93841	0.954872	1.38297e-05	0.000159022
RRAD	2.58261	1.36883	1.38711e-05	0.000159408
C1orf105	1.42549	0.511456	1.39093e-05	0.000159758
ESPL1	1.38957	0.474635	1.39273e-05	0.000159876
KRT13	0.159702	-2.64655	1.39698e-05	0.000160222
SURF2	1.32208	0.402815	1.39732e-05	0.000160222
S1PR2	1.31596	0.396113	1.40193e-05	0.000160662
SNRPB2	1.21076	0.275912	1.40859e-05	0.000161335
PCDHB6	0.411161	-1.28223	1.41348e-05	0.000161804
SCN8A	2.12905	1.09021	1.41701e-05	0.000162031
DCAF7	0.823654	-0.27989	1.41704e-05	0.000162031
KIF17	1.6041	0.681766	1.42495e-05	0.000162783
SMC5	1.26149	0.335134	1.4252e-05	0.000162783
MED19	1.21562	0.281698	1.42764e-05	0.00016297
HLA-DOA	2.15668	1.10881	1.43079e-05	0.000163239
LOC389333	1.40281	0.488315	1.43368e-05	0.000163478
MUCL1	0.411817	-1.27992	1.43893e-05	0.000163985
RNF167	1.21741	0.283813	1.44605e-05	0.000164705
CKAP5	1.28905	0.366311	1.44778e-05	0.000164733
FANCB	1.3939	0.47913	1.4479e-05	0.000164733
TAS1R3	1.91449	0.936959	1.45147e-05	0.000165047
MGA	0.769648	-0.37773	1.45318e-05	0.000165112
SPTLC1	1.2312	0.30007	1.45365e-05	0.000165112
KLHL15	1.27111	0.346086	1.45524e-05	0.000165195
HYLS1	1.34481	0.427403	1.45599e-05	0.000165195
C9orf140	1.56549	0.64661	1.46164e-05	0.000165744
KIAA0406	1.21163	0.276943	1.46289e-05	0.000165794
L3MBTL3	0.73804	-0.438229	1.46406e-05	0.000165836
CP	0.230208	-2.11899	1.46972e-05	0.000166385
DYNC1I1	0.450185	-1.15141	1.47798e-05	0.000167227
COBLL1	0.603668	-0.728172	1.47899e-05	0.000167249
PRKD2	0.816318	-0.292796	1.48117e-05	0.000167403
CCDC77	1.29289	0.370603	1.48456e-05	0.000167694
POP4	1.24854	0.320245	1.48749e-05	0.000167933
LETMD1	0.811979	-0.300485	1.49379e-05	0.00016855
GBP1	1.91166	0.934824	1.49585e-05	0.00016869
TNFRSF10B	0.737403	-0.439475	1.50505e-05	0.000169634
DNAJC8	1.13539	0.183184	1.51489e-05	0.00017065
JAK2	1.48344	0.568947	1.51665e-05	0.000170727
AZI1	1.3024	0.381175	1.51724e-05	0.000170727
RASAL2	1.35873	0.442259	1.52339e-05	0.000171325
SNRPC	1.20492	0.268943	1.53329e-05	0.000172344
UBE2L3	0.831278	-0.266597	1.53703e-05	0.000172668
PDCD7	0.834639	-0.260775	1.53786e-05	0.000172668
CCBE1	2.47275	1.30611	1.54194e-05	0.000173031
CDH16	2.05999	1.04263	1.54767e-05	0.000173519
DACH2	0.433274	-1.20665	1.54798e-05	0.000173519
DNAJC1	1.28376	0.360381	1.54983e-05	0.000173573
GLTSCR2	0.751644	-0.411878	1.55015e-05	0.000173573
ZNF167	0.589804	-0.761693	1.55138e-05	0.000173616
C3orf54	0.590433	-0.760156	1.55635e-05	0.000174077
UBN2	0.760707	-0.394588	1.55968e-05	0.000174354
TEX11	1.5824	0.662118	1.56093e-05	0.000174399
OR5M11	0.637485	-0.649538	1.56254e-05	0.000174483
C17orf64	1.44806	0.534123	1.56723e-05	0.000174912
KTELC1	0.799313	-0.323168	1.58943e-05	0.000177292
TTC16	1.56366	0.644927	1.59028e-05	0.000177292
IL1R2	2.20633	1.14165	1.59403e-05	0.000177613
HELLS	1.32311	0.403937	1.60095e-05	0.000178287
TGM2	2.21159	1.14508	1.60527e-05	0.000178671
BTAF1	0.744661	-0.425345	1.61794e-05	0.000179952
TADA2B	0.843647	-0.245289	1.61853e-05	0.000179952
CXorf56	1.34547	0.428112	1.61952e-05	0.000179965
FEM1A	0.83623	-0.258028	1.62084e-05	0.000180014
ODC1	1.55109	0.633278	1.62865e-05	0.000180783
AQP12B	0.522747	-0.935815	1.63324e-05	0.000181149
SP4	1.35409	0.437326	1.63372e-05	0.000181149
CD8A	2.19527	1.1344	1.63896e-05	0.000181632
IRX5	0.458431	-1.12522	1.64479e-05	0.00018218
NAT8	0.585525	-0.772196	1.65327e-05	0.00018302
RBM14	1.13442	0.181961	1.66253e-05	0.000183849
FOXA1	0.304901	-1.71359	1.66255e-05	0.000183849
ASB8	0.850665	-0.233338	1.67004e-05	0.000184577
CNO	0.786958	-0.345641	1.67309e-05	0.000184689
C15orf23	1.28561	0.362455	1.67344e-05	0.000184689
CHAF1A	1.26182	0.335508	1.67375e-05	0.000184689
SLC25A43	1.47473	0.560449	1.71662e-05	0.000189318
TSSK1B	0.716751	-0.480456	1.72406e-05	0.000190036
ANP32E	1.30231	0.38107	1.72902e-05	0.000190481
ASCC2	0.726445	-0.461074	1.73178e-05	0.000190597
MSTN	0.631536	-0.663064	1.73194e-05	0.000190597
IL27	1.64172	0.715209	1.73505e-05	0.000190837
CAPN13	0.285329	-1.8093	1.73615e-05	0.000190856
MEPE	0.694243	-0.526488	1.73814e-05	0.00019093
FAM164A	0.723287	-0.467361	1.73869e-05	0.00019093
TUBB2C	1.28499	0.361756	1.74382e-05	0.000191391
FBXO36	0.70591	-0.502444	1.75158e-05	0.000192139
CXCL2	2.31434	1.2106	1.75275e-05	0.000192165
GAL3ST4	1.62677	0.702012	1.75718e-05	0.000192531
NCRNA00174	0.664215	-0.590279	1.75896e-05	0.000192531
ANLN	1.48246	0.567989	1.75929e-05	0.000192531
ZBP1	2.47835	1.30938	1.75984e-05	0.000192531
CFHR3	0.551726	-0.857976	1.76211e-05	0.000192676
AKT3	1.78126	0.832894	1.76863e-05	0.000193286
SPAG8	1.53615	0.619314	1.77834e-05	0.000194243
C6orf147	1.74624	0.804253	1.78342e-05	0.000194652
PRRT4	2.1122	1.07874	1.78398e-05	0.000194652
FAM161A	1.41556	0.501375	1.79303e-05	0.000195536
MRGPRE	1.27398	0.349338	1.79699e-05	0.000195863
NHLRC3	0.777528	-0.363033	1.81205e-05	0.0001974
EIF2S2	1.22327	0.290745	1.81543e-05	0.000197663
TFF1	0.261648	-1.9343	1.83097e-05	0.000199145
CNTD2	1.96556	0.974938	1.83098e-05	0.000199145
RHOF	2.25189	1.17114	1.84751e-05	0.000200836
HSPA5	1.22844	0.296833	1.84883e-05	0.000200873
PCDHB11	0.485852	-1.04141	1.85832e-05	0.000201797
C4orf31	0.506524	-0.981298	1.85969e-05	0.000201838
TMEM128	0.810699	-0.302762	1.88303e-05	0.000204264
IL24	2.64163	1.40143	1.89299e-05	0.000205236
ISG20L2	1.20785	0.272444	1.90184e-05	0.000206087
THOC1	1.25766	0.330736	1.90869e-05	0.000206719
CAPSL	1.52296	0.606882	1.91352e-05	0.000207133
ABCB7	1.20866	0.273407	1.92372e-05	0.000208128
C15orf29	0.832115	-0.265145	1.93101e-05	0.000208563
BTF3	0.79999	-0.321946	1.93108e-05	0.000208563
RBM15	1.22167	0.288851	1.93145e-05	0.000208563
CCL13	2.51157	1.32859	1.93182e-05	0.000208563
MYBPC3	1.49192	0.577173	1.93613e-05	0.000208918
SMUG1	0.806678	-0.309935	1.94146e-05	0.000209383
SLC2A8	1.41747	0.503323	1.94633e-05	0.000209798
NUCB2	1.28749	0.364557	1.95176e-05	0.000210274
GOLGA6L10	0.638179	-0.647967	1.95285e-05	0.000210281
UBE2A	1.17179	0.228711	1.95702e-05	0.000210618
HIST1H4H	1.83088	0.872541	1.9724e-05	0.000212101
SLC16A10	1.82396	0.86707	1.97287e-05	0.000212101
SLC7A4	0.351635	-1.50785	1.97652e-05	0.000212383
CYP27A1	1.92429	0.944327	1.98497e-05	0.000212963
EEF1A1	0.802483	-0.317458	1.98503e-05	0.000212963
SPINK2	1.62549	0.700872	1.98504e-05	0.000212963
HRCT1	1.98325	0.987865	1.98743e-05	0.000213109
SKP2	1.42471	0.510669	1.98999e-05	0.000213271
BHLHE41	0.510916	-0.968842	1.99551e-05	0.000213751
MAP1LC3B	0.821332	-0.283962	2.0031e-05	0.000214452
RPLP1	0.755518	-0.404462	2.0103e-05	0.00021511
KCTD18	0.808853	-0.306051	2.0145e-05	0.000215447
RUFY2	0.813825	-0.297209	2.01807e-05	0.000215717
PTTG3P	1.41331	0.499082	2.01989e-05	0.000215735
CYBASC3	1.22774	0.296006	2.02034e-05	0.000215735
TACC2	0.670576	-0.576528	2.02236e-05	0.000215838
FAM134C	0.842506	-0.24724	2.02468e-05	0.000215973
C19orf47	1.24932	0.321138	2.03018e-05	0.000216447
TMEM200B	2.01514	1.01088	2.04566e-05	0.000217984
RNF144A	1.49332	0.578526	2.05684e-05	0.000219061
DNAL4	0.766639	-0.383381	2.06219e-05	0.00021944
FBXO27	0.47188	-1.08351	2.06253e-05	0.00021944
CLDN6	1.98625	0.990044	2.07021e-05	0.000220142
C15orf48	2.372	1.2461	2.07327e-05	0.000220353
FLJ45340	0.751111	-0.412902	2.0811e-05	0.000221071
FBXW4	0.792399	-0.335701	2.08328e-05	0.000221188
PMP22	1.78705	0.837576	2.08987e-05	0.000221773
NXF1	0.854338	-0.227121	2.09405e-05	0.000222102
FFAR2	2.15094	1.10496	2.09846e-05	0.000222454
AGAP11	0.414443	-1.27076	2.11614e-05	0.000224042
SLC4A1AP	1.15563	0.208678	2.11658e-05	0.000224042
OGDH	1.21449	0.280352	2.11672e-05	0.000224042
PIGY	0.835011	-0.260132	2.12001e-05	0.000224275
NDUFS6	1.32228	0.403025	2.12679e-05	0.000224876
P4HA1	0.720012	-0.473908	2.12961e-05	0.000225058
COX15	0.849387	-0.235506	2.13764e-05	0.000225791
PIPOX	1.68448	0.752304	2.18045e-05	0.000230193
MAP3K5	0.720719	-0.472491	2.18181e-05	0.000230219
CYP4F11	0.336891	-1.56965	2.1867e-05	0.000230616
INTS6	0.788961	-0.341973	2.19552e-05	0.000231427
RPL6	0.783035	-0.352851	2.20539e-05	0.000232321
LRP5L	0.668363	-0.581297	2.20627e-05	0.000232321
SLC44A5	0.44355	-1.17283	2.22049e-05	0.000233699
NCRNA00086	0.534654	-0.903323	2.22527e-05	0.000234081
NCAPD3	1.28584	0.362707	2.22764e-05	0.00023421
KLHL29	0.522303	-0.937042	2.24002e-05	0.000235274
DPH2	1.2225	0.289838	2.24005e-05	0.000235274
C9orf89	1.30231	0.381077	2.24291e-05	0.000235453
MYH16	2.03942	1.02816	2.24681e-05	0.000235743
HMMR	1.41396	0.499742	2.27226e-05	0.000238291
GJC3	0.642924	-0.637279	2.2748e-05	0.000238406
C4orf6	0.684355	-0.547183	2.27569e-05	0.000238406
PLAG1	0.540978	-0.886358	2.28344e-05	0.000238995
HSP90AB4P	0.673616	-0.570002	2.28363e-05	0.000238995
BMPR2	0.796446	-0.328351	2.29428e-05	0.000239961
RRP1B	1.22038	0.28733	2.29521e-05	0.000239961
CELSR3	1.84326	0.88226	2.31069e-05	0.000241457
B3GNT5	1.45334	0.53937	2.31218e-05	0.000241489
TBC1D17	0.809365	-0.305138	2.31516e-05	0.000241678
RASGEF1C	1.6169	0.693228	2.32165e-05	0.000242232
CDK5RAP1	1.20165	0.265023	2.3237e-05	0.000242322
LDLRAP1	1.2604	0.333876	2.32861e-05	0.00024271
ACTL6A	1.22934	0.297881	2.33439e-05	0.00024319
KIF23	1.35617	0.439538	2.33649e-05	0.000243284
NINJ1	1.38644	0.471389	2.34112e-05	0.000243643
TMEM116	0.701014	-0.512486	2.34548e-05	0.000243866
CHST11	2.084	1.05936	2.34565e-05	0.000243866
HOXC6	0.44197	-1.17798	2.36062e-05	0.000245299
ZKSCAN1	0.725028	-0.463892	2.36381e-05	0.000245506
RAB3GAP2	0.826027	-0.27574	2.37174e-05	0.000246204
ITPR3	1.46057	0.546535	2.37346e-05	0.000246258
PRPF40B	0.765421	-0.385674	2.38478e-05	0.000247265
KANK2	1.44783	0.533893	2.38557e-05	0.000247265
KALRN	1.85146	0.88866	2.39511e-05	0.00024807
ATG2B	0.799826	-0.322242	2.39576e-05	0.00024807
OAT	0.5062	-0.98222	2.39917e-05	0.000248298
TRIM6	1.77769	0.830005	2.40379e-05	0.000248651
CXCL10	2.89696	1.53454	2.40693e-05	0.00024885
AMIGO2	0.54868	-0.865962	2.41156e-05	0.000249203
C11orf1	0.728904	-0.4562	2.41754e-05	0.000249695
MAMSTR	1.56794	0.648867	2.41948e-05	0.00024977
CCDC112	1.37448	0.458886	2.43194e-05	0.000250929
IGFBPL1	1.84523	0.883799	2.43766e-05	0.000251393
MPZL2	0.590569	-0.759823	2.44325e-05	0.000251843
GOLPH3	1.24814	0.319778	2.45026e-05	0.000252389
STRADA	0.833693	-0.262411	2.45189e-05	0.000252389
PTPLAD2	1.75273	0.8096	2.45224e-05	0.000252389
C20orf46	0.54607	-0.872843	2.46959e-05	0.000254047
SAP30	1.30274	0.381546	2.48374e-05	0.000255374
PANK2	1.19377	0.255526	2.48794e-05	0.000255638
IFRD2	1.24181	0.312443	2.4888e-05	0.000255638
TULP3	1.242	0.31267	2.49334e-05	0.000255879
C5orf56	1.49897	0.583972	2.49402e-05	0.000255879
[truncated: 6,651 more rows]

## Sheet: BRCA
Table2. Differential expression genes related CDKN2A in TCGA-BRCA
id	fc	log2fc	pvalue	padj
CDKN2A	14.8888	3.89616	6.39846e-210	1.31181e-205
CDKN2BAS	4.18193	2.06417	3.01331e-97	3.08895e-93
C9orf53	2.2939	1.1978	3.98904e-71	2.72611e-67
SPG11	0.587401	-0.767583	1.17758e-46	6.03568e-43
LRBA	0.480018	-1.05884	6.64521e-46	2.7248e-42
DNAJB14	0.575285	-0.797652	3.83e-44	1.30871e-40
ATG2B	0.611457	-0.709676	1.40946e-43	4.12811e-40
RB1	0.512217	-0.965174	3.5217e-43	9.02525e-40
ACER2	0.351861	-1.50692	4.60581e-42	1.03833e-38
RABEP1	0.487641	-1.03611	5.06453e-42	1.03833e-38
LASS6	0.433532	-1.20579	8.99021e-42	1.67561e-38
IL6ST	0.192028	-2.38061	1.10242e-41	1.88349e-38
TRIP11	0.594968	-0.749117	2.57775e-41	4.0653e-38
MIIP	1.80091	0.848726	1.46968e-40	2.15224e-37
STAM2	0.657148	-0.605709	3.09139e-40	4.13664e-37
SLC39A9	0.648281	-0.625308	3.22828e-40	4.13664e-37
SPOPL	0.531921	-0.910716	5.11811e-40	6.17244e-37
KIAA0232	0.578033	-0.790776	7.31995e-40	7.93214e-37
FAM58A	1.63916	0.712961	7.35102e-40	7.93214e-37
UBR1	0.572251	-0.805281	1.6907e-39	1.73314e-36
UEVLD	0.538911	-0.891881	3.582e-39	3.49705e-36
FAM100B	1.75774	0.81372	4.96935e-39	4.63099e-36
SNRPA	1.48992	0.575239	6.48764e-39	5.78303e-36
MKL2	0.526814	-0.924634	9.82766e-39	8.05558e-36
MAGOH	1.59817	0.676423	9.90846e-39	8.05558e-36
ATP8B1	0.47012	-1.0889	1.02158e-38	8.05558e-36
WDFY3	0.597576	-0.742805	2.07175e-38	1.57315e-35
TPRA1	1.45345	0.539482	3.33744e-38	2.37736e-35
SYNJ2BP	0.628418	-0.670204	3.36277e-38	2.37736e-35
ALDH6A1	0.495995	-1.0116	3.70508e-38	2.47157e-35
AR	0.146247	-2.77352	3.73714e-38	2.47157e-35
LOC152217	1.62089	0.696787	4.69787e-38	3.00986e-35
EXOC6	0.550715	-0.860623	5.25222e-38	3.26306e-35
RRP1	1.78394	0.835069	6.26797e-38	3.77959e-35
ELMOD2	0.634585	-0.656115	7.95729e-38	4.59114e-35
FAM179B	0.57148	-0.807225	8.0617e-38	4.59114e-35
GIGYF2	0.716234	-0.481497	9.58876e-38	5.31321e-35
RAB27B	0.336767	-1.57018	1.00333e-37	5.41325e-35
C11orf75	2.21046	1.14435	1.10129e-37	5.78938e-35
AHNAK	0.504763	-0.986322	1.26822e-37	6.50025e-35
DAZAP1	1.40505	0.490626	1.47456e-37	7.2147e-35
DGKZ	1.66331	0.734059	1.47799e-37	7.2147e-35
YBX1	1.75621	0.812464	1.63768e-37	7.67865e-35
NEK5	0.289715	-1.78729	1.64794e-37	7.67865e-35
TBCK	0.639535	-0.644905	2.12359e-37	9.629e-35
KIAA1370	0.436937	-1.1945	2.16044e-37	9.629e-35
UTP14C	0.61659	-0.697618	2.32654e-37	1.01487e-34
COL4A3BP	0.623342	-0.681904	2.68463e-37	1.14667e-34
DNAL1	0.581638	-0.781807	4.97304e-37	2.08076e-34
GPR81	0.245765	-2.02465	5.51368e-37	2.26083e-34
INPP4B	0.292503	-1.77348	7.26375e-37	2.92003e-34
TP53INP1	0.483338	-1.0489	7.84124e-37	3.09156e-34
MFAP3	0.654232	-0.612126	8.44138e-37	3.26538e-34
RALGAPA1	0.600169	-0.73656	1.06621e-36	4.04804e-34
HIF1AN	0.718541	-0.476858	1.36127e-36	5.07432e-34
EPB41L5	0.539315	-0.8908	1.47387e-36	5.39593e-34
UBE2S	2.1074	1.07546	1.78714e-36	6.42807e-34
AFF1	0.583037	-0.778341	2.10691e-36	7.44756e-34
SEL1L	0.627925	-0.671336	4.09221e-36	1.42201e-33
SPTLC2	0.551819	-0.857733	4.17827e-36	1.42772e-33
RPP21	1.69985	0.765409	4.44707e-36	1.49465e-33
PANK3	0.544747	-0.876342	4.81382e-36	1.59182e-33
BRI3	1.58568	0.6651	4.89663e-36	1.5935e-33
CCNE1	3.06028	1.61366	6.20443e-36	1.98755e-33
LCOR	0.389741	-1.35941	6.6006e-36	2.08193e-33
RNF166	1.70097	0.766356	6.71005e-36	2.08439e-33
DTWD2	0.563462	-0.82761	8.30089e-36	2.54007e-33
UQCRH	1.63687	0.71094	9.38327e-36	2.82906e-33
TTC8	0.592986	-0.75393	1.09905e-35	3.26563e-33
TBC1D9	0.27903	-1.84151	1.62624e-35	4.76303e-33
ENTPD5	0.458688	-1.12442	1.90988e-35	5.51498e-33
RELT	1.79992	0.847937	1.9789e-35	5.63492e-33
ARID2	0.627779	-0.671672	2.69057e-35	7.55646e-33
STRN3	0.641359	-0.640796	3.00781e-35	8.33326e-33
WWP1	0.476838	-1.06843	3.78695e-35	1.0352e-32
FYCO1	0.599524	-0.738111	5.24795e-35	1.39842e-32
NRIP1	0.477896	-1.06523	5.25208e-35	1.39842e-32
TIMM44	1.58256	0.662263	5.73529e-35	1.5075e-32
ERI3	1.44077	0.526837	7.54053e-35	1.95691e-32
CTU1	1.82552	0.868309	9.62681e-35	2.43993e-32
C4orf34	0.480161	-1.05841	9.63977e-35	2.43993e-32
CDKN2B	2.21385	1.14656	9.83756e-35	2.45963e-32
ZNF844	0.472226	-1.08245	1.09346e-34	2.70097e-32
HECTD1	0.656352	-0.607459	1.47399e-34	3.59758e-32
PDPK1	0.634378	-0.656586	1.80441e-34	4.35225e-32
THAP6	0.70594	-0.502382	2.12687e-34	5.07035e-32
RBM38	1.93996	0.956025	2.24209e-34	5.28359e-32
RHBDD1	0.691867	-0.531434	2.62685e-34	6.11996e-32
U2AF1	1.45457	0.540593	3.20148e-34	7.33018e-32
FAM114A2	0.67636	-0.564136	3.21781e-34	7.33018e-32
RBM42	1.60187	0.679759	3.2685e-34	7.36381e-32
UGCG	0.352092	-1.50598	3.97843e-34	8.86585e-32
ARFIP1	0.689067	-0.537283	4.41858e-34	9.74084e-32
RAD50	0.631755	-0.662564	4.48258e-34	9.7768e-32
LSM7	1.78134	0.832962	4.63326e-34	9.99907e-32
C12orf51	0.636063	-0.652757	4.92984e-34	1.05283e-31
RALGAPB	0.66489	-0.588812	7.10439e-34	1.50159e-31
UQCRHL	1.68076	0.749114	7.40632e-34	1.54943e-31
ACADSB	0.373976	-1.41898	7.53133e-34	1.55967e-31
SLC16A6	0.233912	-2.09596	7.87643e-34	1.61483e-31
LMBRD2	0.473423	-1.0788	8.28941e-34	1.68267e-31
TSPO	1.93089	0.949263	1.01111e-33	2.03232e-31
BTBD7	0.675557	-0.565851	1.13413e-33	2.25748e-31
SEC23IP	0.660543	-0.598276	1.75083e-33	3.45148e-31
MRPS12	1.65493	0.726773	1.94477e-33	3.7973e-31
AFF4	0.604553	-0.72606	1.96477e-33	3.80017e-31
ARID4A	0.641802	-0.639799	2.06931e-33	3.96495e-31
JKAMP	0.697315	-0.520118	2.17801e-33	4.13459e-31
FNIP1	0.622246	-0.684444	2.29725e-33	4.32093e-31
TMEM39B	1.50495	0.589712	2.61894e-33	4.88122e-31
UPP1	2.05158	1.03674	2.84299e-33	5.25108e-31
KIAA1109	0.575732	-0.796531	3.11963e-33	5.71059e-31
PPM1A	0.699837	-0.51491	3.96784e-33	7.199e-31
CENPW	2.3368	1.22453	4.17024e-33	7.49984e-31
PDCD5	1.61167	0.688553	4.68053e-33	8.34437e-31
MRPL4	1.59579	0.674272	4.91098e-33	8.6739e-31
TMEM184C	0.691368	-0.532475	4.94998e-33	8.6739e-31
PJA2	0.632906	-0.659936	5.0682e-33	8.80578e-31
PLEKHF1	2.31299	1.20976	5.11847e-33	8.81839e-31
ECE2	1.92335	0.943623	5.49593e-33	9.38979e-31
NAA10	1.55593	0.637779	6.00278e-33	1.0171e-30
TOMM40	1.5795	0.659466	7.76753e-33	1.30533e-30
C3orf63	0.70383	-0.506702	7.94485e-33	1.32427e-30
SRM	1.64183	0.715305	8.23074e-33	1.36086e-30
H2AFX	1.78818	0.838494	9.94334e-33	1.63087e-30
PRSS53	1.95808	0.969442	1.30589e-32	2.12487e-30
NFKBIB	1.67594	0.744972	1.63692e-32	2.64253e-30
GSTCD	0.562017	-0.831315	2.23874e-32	3.58583e-30
SFRS2IP	0.688243	-0.539009	2.4484e-32	3.89124e-30
DNAJC16	0.687889	-0.539751	2.69281e-32	4.24676e-30
XIAP	0.715539	-0.482897	3.35188e-32	5.24582e-30
CT62	0.234866	-2.09009	3.57222e-32	5.5483e-30
ZFYVE16	0.655151	-0.6101	3.96677e-32	6.11479e-30
CEBPB	1.96672	0.975791	4.12797e-32	6.3158e-30
LOC647979	0.686852	-0.541929	4.26655e-32	6.47947e-30
THSD4	0.255674	-1.96763	4.59903e-32	6.8974e-30
C5orf41	0.513556	-0.961407	4.60903e-32	6.8974e-30
NEK9	0.694901	-0.52512	4.74858e-32	7.05474e-30
THOC4	1.71805	0.78077	4.80602e-32	7.08871e-30
FAM161B	0.475874	-1.07135	5.14153e-32	7.52941e-30
SCNM1	1.51733	0.601533	5.21812e-32	7.58736e-30
ARHGAP22	2.15159	1.10541	6.27218e-32	9.05579e-30
KIAA1737	0.662418	-0.594187	6.52047e-32	9.34844e-30
ZNF281	0.451447	-1.14737	7.11927e-32	1.01361e-29
ARFGEF2	0.594542	-0.75015	9.21708e-32	1.29474e-29
POP7	1.54385	0.626534	9.22019e-32	1.29474e-29
KLHL11	0.416599	-1.26327	9.56505e-32	1.33403e-29
ZNF358	1.6732	0.742612	9.84999e-32	1.36449e-29
NUDT1	1.75469	0.81122	1.01282e-31	1.39361e-29
POLR2F	1.70455	0.769388	1.04207e-31	1.4243e-29
CCNG2	0.553252	-0.853991	1.10401e-31	1.49896e-29
APPL2	0.661297	-0.59663	1.16757e-31	1.5716e-29
TUBB6	1.85208	0.889143	1.17284e-31	1.5716e-29
PSMG3	1.62326	0.698895	1.19564e-31	1.59176e-29
EIF4EBP1	2.15931	1.11057	1.20659e-31	1.59597e-29
SEC24B	0.697462	-0.519813	1.22201e-31	1.606e-29
ZNF619	0.546741	-0.87107	1.25e-31	1.63233e-29
C21orf70	1.92678	0.946192	1.3247e-31	1.71892e-29
MICALCL	0.368093	-1.44186	1.39417e-31	1.79769e-29
ZNF678	0.497814	-1.00632	1.54785e-31	1.98338e-29
FRS2	0.535831	-0.900151	1.55794e-31	1.98391e-29
FAM175A	0.666862	-0.584539	1.62206e-31	2.05281e-29
TMSB10	1.87648	0.90803	1.74337e-31	2.1928e-29
C5orf36	0.508434	-0.975869	1.96957e-31	2.4622e-29
TMEM87B	0.655747	-0.60879	2.03053e-31	2.52302e-29
ZKSCAN1	0.508719	-0.975059	2.16201e-31	2.67022e-29
SEPSECS	0.628769	-0.669398	2.19783e-31	2.6982e-29
KLHDC3	1.50894	0.593538	2.44719e-31	2.98644e-29
MAD2L2	1.67062	0.740386	2.58369e-31	3.13437e-29
PCBP4	1.63492	0.709216	2.77834e-31	3.35068e-29
DMXL1	0.599322	-0.738597	2.92717e-31	3.50601e-29
ZNF91	0.512021	-0.965726	2.94134e-31	3.50601e-29
ATE1	0.521586	-0.939023	3.01376e-31	3.56708e-29
TTC30B	0.594832	-0.749447	3.02737e-31	3.56708e-29
TRIM23	0.650593	-0.620174	3.40199e-31	3.98558e-29
LRRFIP1	0.680631	-0.555055	3.59523e-31	4.18804e-29
IBTK	0.689181	-0.537046	3.88066e-31	4.46995e-29
C14orf43	0.656097	-0.608019	3.88085e-31	4.46995e-29
KLHL28	0.613513	-0.704834	4.15376e-31	4.75756e-29
KIF16B	0.518611	-0.947275	4.3904e-31	5.00066e-29
ZBTB41	0.585804	-0.771511	4.49763e-31	5.07122e-29
CPEB2	0.48591	-1.04124	4.50181e-31	5.07122e-29
RAB30	0.389601	-1.35993	4.78418e-31	5.35985e-29
MED13L	0.53728	-0.896254	4.89617e-31	5.4555e-29
FMN1	0.36895	-1.4385	5.11293e-31	5.64542e-29
NDUFA11	1.59952	0.677636	5.12169e-31	5.64542e-29
DHX29	0.698683	-0.517291	5.17884e-31	5.67789e-29
LONP2	0.621673	-0.685773	5.26299e-31	5.73946e-29
POLD1	1.6664	0.736733	5.47409e-31	5.93809e-29
MCM5	1.64485	0.717952	5.55826e-31	5.99765e-29
ISY1	1.31377	0.393711	5.61762e-31	6.02997e-29
GLUD2	0.583114	-0.77815	6.09164e-31	6.50473e-29
MRPL2	1.56726	0.648248	6.53942e-31	6.94669e-29
CPEB3	0.59912	-0.739083	7.46712e-31	7.89128e-29
HNRNPH2	0.731931	-0.450221	8.09828e-31	8.51441e-29
CSK	1.43964	0.525708	8.20339e-31	8.55587e-29
HOMER3	1.9421	0.957616	8.22118e-31	8.55587e-29
KIAA2013	1.42174	0.507654	9.08317e-31	9.40521e-29
UBE3B	0.730036	-0.453961	9.36574e-31	9.64906e-29
NBR1	0.684161	-0.547591	1.07304e-30	1.09998e-28
ARHGEF12	0.625004	-0.678062	1.09817e-30	1.12013e-28
MPP5	0.648202	-0.625484	1.23365e-30	1.2521e-28
BAZ2A	0.707307	-0.499591	1.32215e-30	1.3353e-28
TNFRSF4	2.23531	1.16047	1.35927e-30	1.36606e-28
CLASP2	0.677728	-0.561223	1.37002e-30	1.37016e-28
B4GALT2	1.51363	0.598011	1.37865e-30	1.37209e-28
CHD8	0.74315	-0.428274	1.63174e-30	1.61614e-28
KIAA0564	0.605614	-0.723528	1.83233e-30	1.80607e-28
CTU2	1.67849	0.747161	2.29948e-30	2.25569e-28
MRPL11	1.53119	0.61465	2.56622e-30	2.50537e-28
ZNF24	0.659799	-0.599902	2.70057e-30	2.62403e-28
LOC339674	2.19587	1.13479	3.23862e-30	3.13199e-28
NBEA	0.363939	-1.45823	3.34571e-30	3.22036e-28
SMAD5	0.681645	-0.552908	3.50208e-30	3.35513e-28
ZC3H14	0.755926	-0.403682	3.96918e-30	3.78494e-28
PDCD6IP	0.747464	-0.419924	4.25847e-30	4.042e-28
MXD3	1.73192	0.792369	4.8533e-30	4.58536e-28
KIAA0430	0.728535	-0.456931	4.99314e-30	4.69584e-28
CUL3	0.778993	-0.360317	5.1396e-30	4.81151e-28
EDEM3	0.607423	-0.719228	5.63512e-30	5.25142e-28
C14orf174	0.415806	-1.26602	5.66182e-30	5.25242e-28
MUTYH	1.60166	0.679564	5.7417e-30	5.2856e-28
MRPL12	1.77126	0.824776	5.74915e-30	5.2856e-28
AP1AR	0.651033	-0.619198	5.99311e-30	5.4853e-28
C6orf108	1.92319	0.9435	6.04344e-30	5.50679e-28
ZNF587	0.538215	-0.893746	6.44154e-30	5.84356e-28
RNF141	0.650138	-0.621183	6.77336e-30	6.11751e-28
TMEM106B	0.648532	-0.62475	6.90699e-30	6.21084e-28
FAM63B	0.483928	-1.04714	7.35544e-30	6.58521e-28
SERINC3	0.672551	-0.572284	7.73195e-30	6.89219e-28
LIME1	2.58889	1.37233	8.35743e-30	7.41749e-28
FAM120A	0.749393	-0.416206	8.56917e-30	7.54983e-28
SETD7	0.619272	-0.691354	8.58019e-30	7.54983e-28
ANKRD12	0.632112	-0.661749	9.32388e-30	8.16916e-28
CLCN3	0.595743	-0.747238	9.42e-30	8.21825e-28
AKAP11	0.623167	-0.68231	9.60126e-30	8.34089e-28
DPP8	0.541697	-0.884442	1.02641e-29	8.87906e-28
SLMAP	0.694768	-0.525397	1.04303e-29	8.98499e-28
FRYL	0.637438	-0.649643	1.10932e-29	9.51603e-28
CD46	0.626809	-0.673903	1.12532e-29	9.61303e-28
SLC39A6	0.329791	-1.60038	1.16937e-29	9.94787e-28
C20orf94	0.45105	-1.14864	1.22018e-29	1.03373e-27
TCP11L2	0.529544	-0.917178	1.31049e-29	1.10143e-27
GPD1L	0.520333	-0.942493	1.31085e-29	1.10143e-27
BOD1L	0.636897	-0.650869	1.33343e-29	1.11051e-27
AFF3	0.190449	-2.39252	1.33451e-29	1.11051e-27
USP8	0.704419	-0.505493	1.3379e-29	1.11051e-27
ERBB2IP	0.673314	-0.570649	1.75789e-29	1.45324e-27
CYBA	2.12458	1.08718	1.8793e-29	1.54737e-27
KCTD3	0.580208	-0.785358	1.96016e-29	1.60749e-27
ITGB1BP1	1.35128	0.434322	2.38078e-29	1.94465e-27
SH3BP1	1.70231	0.767493	2.4225e-29	1.97088e-27
ITPR1	0.426876	-1.22811	2.43945e-29	1.97682e-27
SLK	0.660418	-0.598549	2.68426e-29	2.16664e-27
ZSCAN29	0.716773	-0.480412	2.86039e-29	2.29976e-27
CCDC107	1.68091	0.74924	3.39215e-29	2.71663e-27
AGGF1	0.730396	-0.453249	3.42858e-29	2.73512e-27
KIAA1244	0.356342	-1.48866	3.47276e-29	2.75963e-27
KDM3B	0.723444	-0.467046	3.61072e-29	2.85818e-27
METTL14	0.687709	-0.540129	3.64331e-29	2.87289e-27
XBP1	0.386644	-1.37092	3.82408e-29	3.00388e-27
RUNDC1	0.621949	-0.685131	3.87838e-29	3.0349e-27
CSTB	1.76759	0.821784	4.02673e-29	3.13901e-27
MIER3	0.655727	-0.608834	4.32633e-29	3.35979e-27
VPS13B	0.599704	-0.737678	4.41531e-29	3.41595e-27
GCC2	0.642754	-0.637662	4.48342e-29	3.4556e-27
PRKCDBP	2.10917	1.07667	4.56969e-29	3.50891e-27
PGGT1B	0.710774	-0.492538	4.88028e-29	3.73342e-27
ST20	1.67693	0.745823	5.33911e-29	4.06923e-27
SP1	0.758022	-0.399689	5.42026e-29	4.11578e-27
LSM2	1.47581	0.561508	5.52088e-29	4.17672e-27
AP2M1	1.34513	0.427742	5.88282e-29	4.43417e-27
PRDX4	1.57719	0.65736	6.72036e-29	5.04691e-27
ARHGAP32	0.548073	-0.867561	6.86397e-29	5.13595e-27
LARP4	0.700877	-0.512767	7.02309e-29	5.23591e-27
RASEF	0.31037	-1.68794	7.12216e-29	5.29053e-27
DAAM1	0.53993	-0.889155	7.44674e-29	5.51167e-27
CDT1	2.13952	1.09729	7.87447e-29	5.80728e-27
SLC10A3	1.45076	0.53681	8.11059e-29	5.95998e-27
SMCR8	0.648603	-0.624593	8.20597e-29	5.992e-27
IDE	0.590299	-0.760482	8.21262e-29	5.992e-27
POLK	0.658862	-0.601952	8.50107e-29	6.18046e-27
CNST	0.704311	-0.505715	9.38367e-29	6.79802e-27
WAPAL	0.72826	-0.457475	9.6348e-29	6.95538e-27
FHL3	1.61682	0.693156	9.82189e-29	7.06556e-27
AKAP9	0.584362	-0.775067	9.96691e-29	7.14481e-27
CCDC85B	2.18622	1.12844	1.15508e-28	8.24527e-27
NDUFB11	1.50294	0.587791	1.15825e-28	8.24527e-27
PREPL	0.691481	-0.532239	1.21598e-28	8.62634e-27
RAPGEF6	0.426616	-1.22899	1.23679e-28	8.7437e-27
FSCN1	2.17593	1.12163	1.25464e-28	8.83938e-27
HAUS7	1.57551	0.655819	1.28345e-28	8.98096e-27
NMB	2.09338	1.06584	1.28349e-28	8.98096e-27
CHD6	0.61378	-0.704206	1.38797e-28	9.67899e-27
BAIAP2L2	2.94674	1.55912	1.43003e-28	9.93845e-27
C19orf43	1.47751	0.563164	1.45606e-28	1.00852e-26
MFSD2B	1.99788	0.998471	1.46424e-28	1.01077e-26
KIAA1598	0.6479	-0.626158	1.51337e-28	1.04118e-26
RNF111	0.69939	-0.51583	1.52933e-28	1.04864e-26
BTRC	0.616902	-0.696887	1.60885e-28	1.09949e-26
VEZF1	0.652502	-0.615946	1.87423e-28	1.27659e-26
MOGS	1.36653	0.450521	1.91615e-28	1.29901e-26
ZNF720	0.68733	-0.540926	1.91981e-28	1.29901e-26
UHMK1	0.38017	-1.39528	2.01294e-28	1.35754e-26
ABAT	0.308459	-1.69685	2.15698e-28	1.44992e-26
HAPLN3	2.7675	1.46858	2.16763e-28	1.45231e-26
BATF3	1.9918	0.994072	2.26687e-28	1.51386e-26
APC	0.648217	-0.625451	2.29387e-28	1.52691e-26
FBXL5	0.681537	-0.553137	2.30636e-28	1.53026e-26
KTI12	1.32699	0.40816	2.33974e-28	1.5474e-26
PML	1.47797	0.563619	2.64951e-28	1.74515e-26
BDP1	0.615516	-0.700132	2.65577e-28	1.74515e-26
CDC42BPB	0.732444	-0.44921	2.81011e-28	1.84067e-26
TMEM192	0.654989	-0.610457	2.83285e-28	1.84966e-26
ZBTB37	0.55387	-0.85238	2.84299e-28	1.85038e-26
SUV39H1	1.44032	0.52639	3.05937e-28	1.97885e-26
PSRC1	1.74611	0.804145	3.05968e-28	1.97885e-26
TSPAN33	1.92679	0.946202	3.1165e-28	2.00926e-26
MTHFD1L	2.1085	1.07622	3.26537e-28	2.09864e-26
PFDN2	1.67101	0.740724	3.28632e-28	2.1055e-26
PSMG1	1.61954	0.695585	3.33338e-28	2.12438e-26
MCCC2	0.526707	-0.924928	3.33651e-28	2.12438e-26
FBXO38	0.693048	-0.528974	3.37325e-28	2.14113e-26
ZNF217	0.589199	-0.763173	3.3861e-28	2.14265e-26
CSNK1G1	0.686839	-0.541957	3.46966e-28	2.18877e-26
PLAUR	1.87775	0.909008	3.60647e-28	2.2681e-26
BAZ2B	0.635562	-0.653895	3.69078e-28	2.31402e-26
TBC1D12	0.670539	-0.576608	3.76769e-28	2.34957e-26
GLIPR2	2.10809	1.07594	3.7704e-28	2.34957e-26
CHST12	1.5772	0.657363	3.87898e-28	2.4099e-26
RAD17	0.752153	-0.410902	4.10578e-28	2.5431e-26
NARF	1.48683	0.572237	4.17514e-28	2.57828e-26
SH3BGRL3	1.52921	0.612782	4.83532e-28	2.97699e-26
PLOD1	1.66462	0.73519	4.91377e-28	3.01623e-26
KIAA1430	0.672618	-0.57214	5.21561e-28	3.19196e-26
ELF1	0.638868	-0.64641	5.26139e-28	3.21039e-26
MYST4	0.52566	-0.927798	5.62791e-28	3.42384e-26
SHFM1	1.54164	0.624465	5.89041e-28	3.56308e-26
ZNF429	0.624829	-0.678466	5.89155e-28	3.56308e-26
C9orf40	1.6976	0.763497	7.3685e-28	4.4432e-26
WDR31	0.464779	-1.10538	8.24763e-28	4.95873e-26
LNX2	0.639702	-0.644528	9.45417e-28	5.66752e-26
PIF1	2.33887	1.22581	9.61228e-28	5.74551e-26
PBX1	0.523464	-0.933837	1.00133e-27	5.96783e-26
TIMM50	1.45039	0.53644	1.07754e-27	6.4034e-26
CCDC124	1.68759	0.754966	1.08911e-27	6.45345e-26
C14orf45	0.542581	-0.882091	1.12782e-27	6.66355e-26
FAM178A	0.718585	-0.476769	1.13352e-27	6.67802e-26
CPEB4	0.565567	-0.822231	1.27041e-27	7.44644e-26
ATP7A	0.616435	-0.69798	1.27122e-27	7.44644e-26
CEP290	0.638765	-0.646642	1.36796e-27	7.99027e-26
C19orf47	1.42673	0.512715	1.38633e-27	8.07461e-26
LYSMD3	0.680646	-0.555024	1.41964e-27	8.24514e-26
CLTA	1.383	0.467798	1.46158e-27	8.46476e-26
UHRF1BP1L	0.656881	-0.606295	1.54096e-27	8.89939e-26
C7orf11	1.3566	0.44	1.55015e-27	8.92729e-26
ZNF484	0.60357	-0.728407	1.56144e-27	8.96715e-26
NUBPL	0.67734	-0.562048	1.59361e-27	9.12629e-26
RALGPS2	0.401463	-1.31666	1.62241e-27	9.26538e-26
CCHCR1	1.65915	0.730444	1.69808e-27	9.67055e-26
GALNT4	0.611138	-0.710431	1.70628e-27	9.69036e-26
ALG3	1.47333	0.559085	1.79694e-27	1.0177e-25
ANKHD1-EIF4EBP3	0.615794	-0.69948	1.92508e-27	1.08727e-25
GOLGA1	0.732552	-0.448997	1.9871e-27	1.11922e-25
RP9P	1.5508	0.63301	2.08392e-27	1.17054e-25
DGUOK	1.38518	0.470072	2.16368e-27	1.21201e-25
CHURC1	0.715966	-0.482037	2.1864e-27	1.22141e-25
TMEM201	1.44808	0.534144	2.2111e-27	1.23185e-25
ATRX	0.6557	-0.608891	2.25106e-27	1.25071e-25
ADPRHL2	1.37843	0.463024	2.47997e-27	1.37417e-25
PAR5	0.378365	-1.40215	2.49249e-27	1.37739e-25
PRR7	2.28124	1.18982	2.55337e-27	1.40724e-25
CCDC102A	1.8039	0.85112	2.56492e-27	1.40981e-25
YIF1B	1.50891	0.593503	2.71261e-27	1.487e-25
KCND3	0.264445	-1.91896	2.73185e-27	1.49356e-25
ARSG	0.401538	-1.31639	2.79335e-27	1.52312e-25
FCHO2	0.663116	-0.592666	2.82423e-27	1.53587e-25
C14orf135	0.705617	-0.503044	2.87044e-27	1.55687e-25
PPAN	1.75719	0.813271	2.88602e-27	1.56119e-25
TOMM5	1.44761	0.533676	2.91842e-27	1.57415e-25
SF3A2	1.47853	0.564168	2.92533e-27	1.57415e-25
LIMA1	0.591007	-0.758752	3.12286e-27	1.67604e-25
SNX13	0.679937	-0.556528	3.17648e-27	1.69595e-25
TMBIM6	0.706832	-0.50056	3.17649e-27	1.69595e-25
RPIA	1.38051	0.465201	3.28998e-27	1.75198e-25
ASH1L	0.62842	-0.6702	3.34495e-27	1.77664e-25
HMGA1	1.78837	0.838643	3.41572e-27	1.80954e-25
ZC3H13	0.667451	-0.583267	3.52298e-27	1.86155e-25
MYO5C	0.533436	-0.906612	3.56339e-27	1.87806e-25
PQBP1	1.47742	0.563082	3.99751e-27	2.10146e-25
NHLRC2	0.566076	-0.820933	4.05727e-27	2.12379e-25
ZFP14	0.66516	-0.588226	4.0607e-27	2.12379e-25
PDHA1	1.39244	0.47761	4.18342e-27	2.18241e-25
TP53BP1	0.696746	-0.521295	4.22333e-27	2.19763e-25
PPM1G	1.35309	0.436262	4.43128e-27	2.3e-25
TMEM144	0.543244	-0.880327	4.55448e-27	2.35798e-25
MON2	0.704539	-0.505248	4.7301e-27	2.44273e-25
MATN4	2.88496	1.52855	4.74818e-27	2.44591e-25
CSRP2	2.19846	1.13649	4.8847e-27	2.50993e-25
CNOT6L	0.701787	-0.510895	4.92058e-27	2.52204e-25
LIN37	1.46413	0.550043	5.14952e-27	2.63281e-25
SLC35A3	0.591902	-0.756569	5.2045e-27	2.6543e-25
ZNF441	0.598718	-0.740051	5.31413e-27	2.70348e-25
BAX	1.50182	0.586709	5.40032e-27	2.74053e-25
ERBB4	0.163333	-2.61411	5.54704e-27	2.80803e-25
ZNF593	1.69725	0.763201	5.66771e-27	2.86206e-25
ERCC4	0.66144	-0.596319	5.83318e-27	2.93838e-25
PDAP1	1.40037	0.485807	6.16868e-27	3.09976e-25
FAM73A	0.566293	-0.82038	6.34182e-27	3.17897e-25
ATAD3A	1.70486	0.769653	6.37815e-27	3.18743e-25
C4orf32	0.463592	-1.10907	6.39211e-27	3.18743e-25
ESR1	0.14139	-2.82225	6.40532e-27	3.18743e-25
KRBA2	0.570618	-0.809404	6.43776e-27	3.19581e-25
PQLC1	1.53976	0.622709	6.54682e-27	3.2421e-25
CELSR1	0.431034	-1.21413	6.7655e-27	3.33559e-25
RSC1A1	0.585817	-0.771477	6.76815e-27	3.33559e-25
WDR65	0.373875	-1.41937	6.81226e-27	3.34928e-25
MED8	1.3221	0.402836	6.94976e-27	3.40871e-25
KIAA0494	0.731175	-0.451712	7.15781e-27	3.50237e-25
KIF3B	0.721345	-0.471239	7.4098e-27	3.61704e-25
PLEKHO1	1.7227	0.784668	7.7976e-27	3.7973e-25
CTSL2	2.66441	1.41382	7.84865e-27	3.80411e-25
UBE3A	0.709829	-0.494457	7.84868e-27	3.80411e-25
SLC24A1	0.64997	-0.621555	8.4916e-27	4.10601e-25
C19orf28	1.4964	0.581498	9.18656e-27	4.4316e-25
ADRM1	1.53876	0.621764	9.59202e-27	4.61633e-25
TNFSF12-TNFSF13	3.9806	1.99299	9.6595e-27	4.63792e-25
MATR3	0.799086	-0.323577	9.71925e-27	4.6557e-25
ZNF787	1.62899	0.70398	9.98268e-27	4.77074e-25
FBXL17	0.655475	-0.609388	1.00879e-26	4.80983e-25
YLPM1	0.736061	-0.442103	1.07291e-26	5.10367e-25
F8A1	1.48487	0.570332	1.15229e-26	5.46859e-25
ARL9	2.84639	1.50913	1.18817e-26	5.62581e-25
C16orf61	1.54347	0.626178	1.19855e-26	5.66193e-25
TRPM7	0.686817	-0.542002	1.21022e-26	5.69161e-25
RALY	1.40401	0.489555	1.21039e-26	5.69161e-25
DDA1	1.37554	0.459997	1.21657e-26	5.70759e-25
HPCAL1	1.49254	0.577773	1.24109e-26	5.80932e-25
TCOF1	1.40944	0.495118	1.28378e-26	5.99546e-25
DNAJB11	1.41806	0.503922	1.33004e-26	6.1974e-25
COX5B	1.53443	0.617701	1.34726e-26	6.25569e-25
PPP1R14B	1.71306	0.776577	1.34866e-26	6.25569e-25
PFN1	1.41092	0.49664	1.42132e-26	6.57787e-25
C19orf60	1.88555	0.914988	1.49982e-26	6.92552e-25
PTTG1	2.03412	1.02441	1.55154e-26	7.14823e-25
RFC4	1.59853	0.67675	1.76546e-26	8.11556e-25
TRAK2	0.636003	-0.652894	1.77464e-26	8.1395e-25
NFKBIE	1.60099	0.678963	2.08189e-26	9.52741e-25
TTC30A	0.599762	-0.737538	2.09445e-26	9.56358e-25
SH2B2	2.05295	1.0377	2.14688e-26	9.76595e-25
TAOK1	0.410774	-1.28358	2.1483e-26	9.76595e-25
LNPEP	0.501682	-0.995154	2.17559e-26	9.86814e-25
SEMA3C	0.415849	-1.26587	2.35048e-26	1.06379e-24
C21orf122	1.58128	0.661095	2.39576e-26	1.08189e-24
EBP	1.55485	0.636775	2.43588e-26	1.09759e-24
MRPS24	1.45716	0.54316	2.4618e-26	1.10684e-24
STOML2	1.39321	0.478416	2.48474e-26	1.11471e-24
PEX12	0.663787	-0.591207	2.58797e-26	1.15849e-24
WNT6	3.77056	1.91478	2.62322e-26	1.1717e-24
TMEM158	2.84941	1.51066	2.77333e-26	1.23606e-24
GOLGB1	0.708021	-0.498136	2.91702e-26	1.29615e-24
CSNK1G3	0.70763	-0.498933	2.92079e-26	1.29615e-24
SNRPC	1.40077	0.486224	2.94484e-26	1.304e-24
TTBK2	0.508462	-0.975788	3.03861e-26	1.34262e-24
FBL	1.58986	0.668895	3.18016e-26	1.40214e-24
ADA	1.76748	0.821697	3.24217e-26	1.42642e-24
PSMG4	1.61061	0.687611	3.32631e-26	1.4603e-24
FAM151B	0.612639	-0.706891	3.50705e-26	1.53636e-24
FUT8	0.55042	-0.861396	3.55427e-26	1.55372e-24
KTN1	0.695341	-0.524207	3.62216e-26	1.58003e-24
RHOG	1.37602	0.460499	4.05513e-26	1.76515e-24
TBCB	1.47799	0.563633	4.07144e-26	1.76849e-24
C9orf64	0.640759	-0.642147	4.15391e-26	1.8005e-24
MYPOP	1.36904	0.453163	4.16414e-26	1.80112e-24
TOX4	0.784871	-0.349473	4.23329e-26	1.82718e-24
C10orf118	0.555459	-0.848248	4.3052e-26	1.85431e-24
HRCT1	3.56227	1.8328	4.3886e-26	1.88627e-24
UBR3	0.69677	-0.521245	4.41559e-26	1.8939e-24
SYCE1L	2.82157	1.4965	4.62157e-26	1.97811e-24
SETD2	0.749807	-0.415409	4.99493e-26	2.13346e-24
COX4I1	1.55186	0.633994	5.15513e-26	2.19731e-24
DCTN4	0.719859	-0.474213	5.22953e-26	2.2244e-24
AFTPH	0.743397	-0.427795	5.27361e-26	2.2385e-24
NF1	0.632896	-0.65996	5.71023e-26	2.41883e-24
IL4I1	2.30579	1.20526	5.95012e-26	2.51525e-24
ABT1	1.31698	0.397235	6.16843e-26	2.60216e-24
ZFYVE26	0.720074	-0.473783	6.25794e-26	2.6345e-24
LSM4	1.48805	0.573419	6.43489e-26	2.70344e-24
POLI	0.644949	-0.632742	6.50522e-26	2.7274e-24
HGS	1.38321	0.468022	6.6832e-26	2.79109e-24
RBM27	0.736019	-0.442185	6.68435e-26	2.79109e-24
YPEL2	0.594231	-0.750904	6.72409e-26	2.80198e-24
MRPL37	1.39259	0.477773	6.85807e-26	2.85201e-24
IPO11	0.726882	-0.460206	6.87555e-26	2.85349e-24
CSNK2B	1.34755	0.430343	6.98006e-26	2.89101e-24
MAST4	0.425889	-1.23145	7.4591e-26	3.0832e-24
ZNF579	1.75087	0.808074	7.6135e-26	3.14068e-24
POMC	2.44002	1.28689	7.65617e-26	3.15194e-24
WIPF2	0.624442	-0.679361	7.79174e-26	3.20133e-24
DDX49	1.44388	0.529946	7.88038e-26	3.23127e-24
RPS19	1.65142	0.723704	8.33744e-26	3.41186e-24
KIAA1012	0.690805	-0.53365	8.6211e-26	3.52091e-24
CCDC125	0.575813	-0.796329	9.21714e-26	3.75686e-24
AKAP10	0.615878	-0.699282	9.26366e-26	3.76833e-24
ALS2CR8	0.629751	-0.667146	9.28945e-26	3.77133e-24
GOLGA4	0.662981	-0.592961	9.56933e-26	3.87728e-24
MAP7D1	1.41194	0.49768	9.92938e-26	4.01005e-24
RBM47	0.602245	-0.731577	9.93612e-26	4.01005e-24
PSMB2	1.38969	0.474764	1.00946e-25	4.066e-24
RREB1	0.660624	-0.598098	1.06777e-25	4.29245e-24
SNRPG	1.43495	0.521004	1.0785e-25	4.32707e-24
NXT1	1.4317	0.517733	1.09651e-25	4.39076e-24
PLEKHF2	0.572963	-0.803487	1.11466e-25	4.45474e-24
FAM195B	1.64023	0.713897	1.12004e-25	4.46751e-24
LRFN1	1.98236	0.987217	1.13227e-25	4.50752e-24
RPS6KA5	0.540192	-0.888455	1.16788e-25	4.64028e-24
VMO1	2.27185	1.18387	1.17607e-25	4.66379e-24
RNASEH2A	1.54585	0.628403	1.20698e-25	4.77713e-24
KIAA1632	0.686819	-0.541997	1.22735e-25	4.84839e-24
C1orf122	1.60292	0.680704	1.24618e-25	4.9133e-24
CCNT1	0.419496	-1.25327	1.27996e-25	5.03679e-24
ZNF791	0.619502	-0.690818	1.28711e-25	5.05522e-24
C4orf29	0.684509	-0.546858	1.29486e-25	5.07463e-24
CDC34	1.54052	0.623421	1.297e-25	5.07463e-24
MLH3	0.752723	-0.409809	1.29988e-25	5.0762e-24
PLA2G12A	0.682191	-0.551752	1.34353e-25	5.2367e-24
ELOVL5	0.505344	-0.984663	1.36213e-25	5.29912e-24
NBEAL1	0.444985	-1.16817	1.42588e-25	5.53661e-24
SNRPB	1.4796	0.56521	1.43996e-25	5.58072e-24
CDC42EP1	1.80017	0.848134	1.51655e-25	5.86621e-24
MRPS15	1.43069	0.516709	1.51934e-25	5.86621e-24
COG3	0.719974	-0.473983	1.5444e-25	5.95175e-24
PEX19	0.74572	-0.423294	1.62065e-25	6.2339e-24
CTRL	1.88005	0.910768	1.64233e-25	6.30544e-24
TMED7	0.690506	-0.534273	1.66223e-25	6.36992e-24
PLEKHB2	0.73439	-0.445381	1.69185e-25	6.47134e-24
SNORD116-28	0.388401	-1.36438	1.75856e-25	6.71395e-24
FOXA1	0.180715	-2.46821	1.83522e-25	6.99364e-24
FZD9	3.47106	1.79538	1.88494e-25	7.16976e-24
BOLA3	1.45562	0.541631	1.94256e-25	7.37524e-24
GALNT7	0.489653	-1.03017	1.97721e-25	7.49293e-24
NCAPH2	1.51052	0.595044	2.02503e-25	7.66e-24
PUSL1	1.59215	0.670977	2.09421e-25	7.9071e-24
ANKRA2	0.663962	-0.590827	2.12395e-25	8.00463e-24
MSI2	0.569394	-0.812502	2.14621e-25	8.07368e-24
APOOL	0.559887	-0.836793	2.20057e-25	8.26301e-24
CDK17	0.66422	-0.590266	2.21172e-25	8.28972e-24
CDC20	2.22624	1.15461	2.25583e-25	8.4396e-24
GPR77	0.333529	-1.58412	2.30204e-25	8.5968e-24
SPHK1	2.04112	1.02936	2.47593e-25	9.22935e-24
DYNC1I2	0.738163	-0.437988	2.51533e-25	9.35922e-24
ADAMTS15	0.245686	-2.02511	2.5346e-25	9.41384e-24
RBL2	0.666164	-0.586052	2.56728e-25	9.51796e-24
C9orf142	1.6864	0.753945	2.66524e-25	9.86329e-24
BCL2L12	1.61705	0.693363	2.74782e-25	1.01506e-23
RTKN	1.469	0.554835	2.756e-25	1.01625e-23
BBS4	0.645565	-0.631367	2.76575e-25	1.01802e-23
RFC2	1.41113	0.496849	2.86742e-25	1.05355e-23
ZNF434	0.747801	-0.419273	2.91224e-25	1.0681e-23
PIGN	0.682477	-0.551148	2.93369e-25	1.07404e-23
TNPO1	0.739432	-0.435511	2.95047e-25	1.07826e-23
GALNT10	0.535242	-0.901736	3.0399e-25	1.10897e-23
PCSK1N	4.74857	2.24749	3.22908e-25	1.17589e-23
PSEN1	0.76962	-0.377782	3.35697e-25	1.22029e-23
FAM136A	1.40351	0.489041	3.42545e-25	1.24298e-23
ZNF552	0.431449	-1.21274	3.51495e-25	1.27321e-23
UCHL1	2.82966	1.50063	3.61202e-25	1.30606e-23
ATP6V1F	1.39131	0.47644	3.68037e-25	1.32843e-23
SLC19A2	0.529156	-0.918236	3.75987e-25	1.35474e-23
PPIP5K2	0.691272	-0.532675	3.78663e-25	1.36199e-23
MTX3	0.6719	-0.573682	3.81195e-25	1.36836e-23
TRIM47	1.79359	0.842851	3.81769e-25	1.36836e-23
FAM3A	1.509	0.593591	4.15207e-25	1.48562e-23
KCNN4	2.78546	1.47792	4.26802e-25	1.52365e-23
KBTBD7	0.543409	-0.87989	4.27323e-25	1.52365e-23
LGALS8	0.636024	-0.652848	4.35003e-25	1.54834e-23
PIK3C2A	0.651876	-0.617331	4.45644e-25	1.58346e-23
NRTN	2.80635	1.4887	4.48748e-25	1.59064e-23
TRABD	1.59819	0.676443	4.49215e-25	1.59064e-23
RFX7	0.686326	-0.543034	4.67529e-25	1.65263e-23
SAC3D1	1.6628	0.733613	4.69918e-25	1.65822e-23
TGM1	2.4977	1.3206	4.77065e-25	1.68055e-23
FTSJ1	1.2718	0.346872	5.04436e-25	1.77392e-23
YTHDC2	0.684984	-0.545858	5.14597e-25	1.80655e-23
NIPBL	0.71289	-0.488249	5.17617e-25	1.81405e-23
RANBP1	1.46889	0.554729	5.35937e-25	1.87505e-23
TRMU	1.5358	0.618988	5.46112e-25	1.90739e-23
APBB2	0.569033	-0.813415	5.51854e-25	1.92417e-23
SLC25A19	1.54171	0.624527	5.57351e-25	1.94004e-23
GREB1	0.27321	-1.87192	5.86669e-25	2.03862e-23
TREX2	2.00606	1.00436	5.90389e-25	2.04808e-23
SCRN3	0.726801	-0.460367	5.99165e-25	2.07459e-23
C1orf58	0.535469	-0.901125	6.00056e-25	2.07459e-23
HEATR5B	0.714765	-0.484459	6.17699e-25	2.132e-23
GNG5	1.40844	0.494095	6.42769e-25	2.2148e-23
CEP120	0.696632	-0.521532	6.45446e-25	2.22029e-23
SFRS12	0.733877	-0.44639	6.60849e-25	2.26947e-23
RNF126	1.47554	0.56124	6.69799e-25	2.29636e-23
RASA1	0.629629	-0.667426	6.81668e-25	2.33315e-23
ADAT3	1.92183	0.94248	6.93307e-25	2.36903e-23
CLTB	1.59951	0.677633	6.99439e-25	2.38601e-23
C4orf41	0.738881	-0.436586	7.31043e-25	2.48968e-23
DDI2	0.435654	-1.19874	7.3336e-25	2.49343e-23
CREB1	0.768338	-0.380187	7.40432e-25	2.5133e-23
RTF1	0.780968	-0.356664	7.47831e-25	2.53422e-23
MTMR10	0.715759	-0.482455	7.73826e-25	2.61798e-23
C2CD4D	2.02164	1.01553	7.77512e-25	2.62612e-23
LRFN4	1.9157	0.937873	7.90783e-25	2.66655e-23
REST	0.458882	-1.1238	7.92289e-25	2.66724e-23
NDUFS6	1.61129	0.688213	8.04578e-25	2.70417e-23
TTC7A	1.5495	0.631801	8.14759e-25	2.73391e-23
PAFAH2	0.711962	-0.490128	8.18808e-25	2.74301e-23
CDK4	1.38733	0.47231	8.81727e-25	2.94897e-23
CDKN2C	1.69395	0.760394	9.23304e-25	3.08299e-23
ARFGEF1	0.64135	-0.640816	9.5421e-25	3.18101e-23
NEK4	0.691962	-0.531236	9.72614e-25	3.23389e-23
CA12	0.244616	-2.03141	9.73226e-25	3.23389e-23
DYNC2H1	0.493798	-1.01801	9.82927e-25	3.26083e-23
C14orf167	0.638068	-0.648218	1.00859e-24	3.34058e-23
KIF13A	0.592977	-0.753951	1.0571e-24	3.49559e-23
MSH3	0.723118	-0.467697	1.05979e-24	3.49883e-23
SCAMP1	0.691506	-0.532187	1.06523e-24	3.51115e-23
MRPS5	1.35694	0.440355	1.11968e-24	3.6847e-23
REEP4	1.56323	0.644534	1.1316e-24	3.71797e-23
HLA-F	2.10136	1.07132	1.13382e-24	3.71929e-23
FITM2	0.603561	-0.728429	1.16718e-24	3.8226e-23
GRK6	1.39089	0.476009	1.22483e-24	4.00503e-23
PHF20	0.726296	-0.46137	1.27045e-24	4.14702e-23
KIAA1467	0.405251	-1.30311	1.2723e-24	4.14702e-23
C1QL2	3.19059	1.67382	1.30899e-24	4.25983e-23
C6orf97	0.301131	-1.73154	1.38444e-24	4.49632e-23
SERPINH1	1.65896	0.730281	1.38605e-24	4.49632e-23
GTF2A1	0.47648	-1.06951	1.42607e-24	4.61885e-23
CCM2	1.42865	0.514653	1.43218e-24	4.63132e-23
ARHGAP12	0.660614	-0.598121	1.46987e-24	4.7457e-23
MAST1	2.85336	1.51266	1.48058e-24	4.77279e-23
FSIP1	0.208244	-2.26365	1.54285e-24	4.96571e-23
NASP	1.47067	0.556476	1.57376e-24	5.05484e-23
TRUB1	0.702699	-0.509022	1.57548e-24	5.05484e-23
GUK1	1.56704	0.648044	1.61353e-24	5.16883e-23
SMARCAD1	0.7014	-0.511691	1.63966e-24	5.24436e-23
UBL3	0.657132	-0.605745	1.68774e-24	5.38972e-23
ATF6	0.7167	-0.480559	1.75081e-24	5.58245e-23
RPS2P32	1.94186	0.957439	1.7768e-24	5.6565e-23
HEATR5A	0.644232	-0.634347	1.85963e-24	5.90875e-23
C9orf30	1.47999	0.565588	1.86179e-24	5.90875e-23
TMUB1	1.57043	0.651158	1.89301e-24	5.99854e-23
CUTA	1.41907	0.504944	1.91137e-24	6.04736e-23
LSM10	1.39624	0.481551	1.94517e-24	6.13743e-23
ATXN7L2	1.57663	0.656846	1.94582e-24	6.13743e-23
G3BP2	0.72165	-0.470629	1.95005e-24	6.1413e-23
PSMC3	1.36477	0.448661	1.95575e-24	6.14982e-23
DNAH7	0.399387	-1.32414	1.99196e-24	6.25407e-23
ANKRD50	0.582539	-0.779574	2.00602e-24	6.28858e-23
HSD17B10	1.4266	0.512578	2.07604e-24	6.49816e-23
PARL	1.28539	0.362205	2.1616e-24	6.75567e-23
FAM127B	1.5463	0.628825	2.17132e-24	6.7757e-23
C10orf125	1.94771	0.961775	2.40105e-24	7.48121e-23
KIAA0831	0.748597	-0.417739	2.418e-24	7.52259e-23
RCBTB1	0.679382	-0.557705	2.42948e-24	7.54684e-23
PSAT1	4.10155	2.03617	2.54193e-24	7.88423e-23
TTC37	0.632895	-0.659962	2.61923e-24	8.1117e-23
CGGBP1	0.77833	-0.361547	2.84099e-24	8.78521e-23
PHC3	0.704616	-0.50509	2.94611e-24	9.09656e-23
PHGDH	2.67954	1.42199	2.97552e-24	9.17354e-23
DPY19L3	0.550056	-0.862349	2.98893e-24	9.20104e-23
AZI1	1.7222	0.78425	3.06396e-24	9.41788e-23
TMF1	0.700791	-0.512943	3.10565e-24	9.53175e-23
IMPA2	2.03162	1.02263	3.11956e-24	9.56013e-23
DAZAP2	0.776356	-0.36521	3.13502e-24	9.59317e-23
ZNF397	0.675227	-0.566556	3.15267e-24	9.63279e-23
SLC30A5	0.740322	-0.433775	3.19414e-24	9.73188e-23
AQR	0.712957	-0.488113	3.19459e-24	9.73188e-23
CASC4	0.71146	-0.491145	3.20217e-24	9.74048e-23
C7orf30	1.36621	0.45018	3.26554e-24	9.91853e-23
MYOF	0.616109	-0.698743	3.31585e-24	1.00565e-22
C19orf50	1.30493	0.383976	3.35832e-24	1.01702e-22
CCDC23	1.37995	0.464616	3.4117e-24	1.03166e-22
SDHAF1	1.44769	0.533757	3.48793e-24	1.05316e-22
MTCP1NB	1.42198	0.507903	3.62684e-24	1.09349e-22
SACM1L	0.759655	-0.396584	3.65414e-24	1.10011e-22
RPUSD3	1.43691	0.522969	3.66595e-24	1.10204e-22
TAB3	0.684444	-0.546996	3.71487e-24	1.11511e-22
CHM	0.674699	-0.567684	3.73997e-24	1.12101e-22
C11orf86	2.74382	1.45618	3.85077e-24	1.15253e-22
NAA30	0.745682	-0.423367	3.91443e-24	1.16988e-22
COL11A2	3.21902	1.68662	4.11687e-24	1.22859e-22
LANCL1	0.7159	-0.48217	4.18183e-24	1.24616e-22
YIPF6	0.679926	-0.556551	4.23458e-24	1.26005e-22
CA5BP	1.43728	0.523337	4.38559e-24	1.30309e-22
REL	0.480606	-1.05707	4.39218e-24	1.30316e-22
ZDHHC18	1.35973	0.443325	4.64889e-24	1.37733e-22
LOC100170939	0.465824	-1.10214	4.75201e-24	1.40586e-22
LRWD1	1.44119	0.527264	4.79938e-24	1.41782e-22
CTR9	0.729844	-0.454339	4.88746e-24	1.44163e-22
PLD3	1.40711	0.492734	4.89405e-24	1.44163e-22
MBD3	1.5341	0.617393	4.91485e-24	1.44569e-22
POLR2I	1.45561	0.541626	4.95358e-24	1.45499e-22
LIMD2	1.99059	0.993194	4.99807e-24	1.46596e-22
MVD	1.81528	0.860191	5.03193e-24	1.47378e-22
WDR19	0.642403	-0.638449	5.30969e-24	1.55291e-22
N4BP2	0.467277	-1.09765	5.34219e-24	1.56019e-22
KCNK12	2.10584	1.0744	5.43518e-24	1.58509e-22
RPS19BP1	1.58835	0.667533	5.44322e-24	1.58518e-22
VPS41	0.741728	-0.431038	5.49023e-24	1.59661e-22
PSMB4	1.42283	0.508763	5.75035e-24	1.66988e-22
CDK2AP1	1.60099	0.678964	5.99377e-24	1.73811e-22
CARD9	2.21746	1.14891	6.22565e-24	1.8028e-22
ENO1	1.58574	0.665156	6.38687e-24	1.84688e-22
SECISBP2L	0.640599	-0.642507	6.5079e-24	1.87922e-22
ZMYND19	1.44284	0.528913	6.59016e-24	1.9003e-22
USP47	0.76301	-0.390226	6.8069e-24	1.96004e-22
NRM	1.56144	0.642879	6.92605e-24	1.99156e-22
SIN3A	0.760347	-0.395269	6.99891e-24	2.00969e-22
LRP3	1.6152	0.691712	7.22453e-24	2.07157e-22
DICER1	0.68577	-0.544204	7.32032e-24	2.09611e-22
CHD1	0.668957	-0.580014	7.48756e-24	2.141e-22
RPN1	1.30722	0.386506	7.54135e-24	2.15338e-22
MAP3K1	0.561799	-0.831873	8.06906e-24	2.30086e-22
C9orf16	1.55632	0.63814	8.17598e-24	2.32811e-22
MED27	1.32196	0.402675	8.6587e-24	2.46215e-22
TRIP10	1.48022	0.565813	8.72984e-24	2.47894e-22
EIF5A	1.40286	0.488375	9.42627e-24	2.67299e-22
RELB	1.68611	0.753702	9.46544e-24	2.67897e-22
FAM96B	1.48823	0.573602	9.47348e-24	2.67897e-22
LATS1	0.52925	-0.917978	9.60968e-24	2.71374e-22
U2AF1L4	1.4741	0.559839	1.01935e-23	2.87466e-22
PRDM10	0.764823	-0.386802	1.02474e-23	2.88587e-22
MLL3	0.658902	-0.601865	1.06472e-23	2.99437e-22
KIAA1704	0.741512	-0.431457	1.07936e-23	3.02753e-22
MGC72080	1.85451	0.891041	1.07947e-23	3.02753e-22
GNB1L	1.7117	0.775426	1.08462e-23	3.03781e-22
SNX19	0.731451	-0.451167	1.09414e-23	3.05778e-22
LOC148696	0.475088	-1.07373	1.09473e-23	3.05778e-22
SUCLG2	0.719331	-0.475272	1.13521e-23	3.16654e-22
SLC25A46	0.709187	-0.495761	1.15825e-23	3.22642e-22
MIF	1.83281	0.874054	1.18963e-23	3.30933e-22
GALC	0.672618	-0.57214	1.21548e-23	3.37666e-22
CCDC28B	1.83196	0.873385	1.22903e-23	3.40596e-22
ATP7B	0.4398	-1.18508	1.22935e-23	3.40596e-22
HBP1	0.769208	-0.378553	1.27072e-23	3.51582e-22
2021-03-08	0.508703	-0.975104	1.30858e-23	3.6157e-22
GALK1	1.64862	0.721263	1.31154e-23	3.61665e-22
FAM167B	1.63863	0.712488	1.31245e-23	3.61665e-22
DOHH	1.71001	0.774003	1.32626e-23	3.6498e-22
SERINC1	0.694383	-0.526196	1.33511e-23	3.66924e-22
LZTFL1	0.67618	-0.56452	1.36086e-23	3.73497e-22
C2orf7	1.49083	0.576118	1.36317e-23	3.73632e-22
DNAH5	0.312313	-1.67894	1.37464e-23	3.76274e-22
MPHOSPH8	0.731468	-0.451134	1.39315e-23	3.80831e-22
C9orf123	1.42007	0.505959	1.44047e-23	3.93242e-22
KRT16	6.7433	2.75345	1.48288e-23	4.04282e-22
ZNF225	0.68454	-0.546794	1.49392e-23	4.06752e-22
RDBP	1.36881	0.452927	1.50015e-23	4.07906e-22
ZNF680	0.630616	-0.665166	1.54006e-23	4.18202e-22
DCAF15	1.3952	0.480467	1.58221e-23	4.29079e-22
SHQ1	0.762908	-0.390419	1.61052e-23	4.3618e-22
PSMA7	1.43084	0.516863	1.62991e-23	4.4085e-22
MCM7	1.54597	0.628512	1.63497e-23	4.41635e-22
FAM198B	0.432367	-1.20967	1.64601e-23	4.44032e-22
SAMD8	0.623938	-0.680525	1.70365e-23	4.58977e-22
OTUD7B	0.698134	-0.518425	1.71075e-23	4.60285e-22
KIAA1143	0.76222	-0.39172	1.75065e-23	4.69808e-22
COTL1	1.78918	0.839296	1.75072e-23	4.69808e-22
KBTBD4	0.663351	-0.592155	1.77658e-23	4.76123e-22
PIKFYVE	0.67502	-0.566997	1.79478e-23	4.80374e-22
C5orf24	0.721233	-0.471463	1.81281e-23	4.84566e-22
MAP1S	1.39743	0.482773	1.83578e-23	4.90067e-22
COX4NB	1.36845	0.452547	1.86468e-23	4.97135e-22
YDJC	1.56441	0.645623	1.87481e-23	4.99185e-22
GLUD1	0.717731	-0.478484	1.91553e-23	5.09367e-22
ZNF625	0.569065	-0.813335	2.09704e-23	5.56911e-22
NEK1	0.686093	-0.543523	2.26796e-23	6.01523e-22
C8G	1.85343	0.890196	2.3137e-23	6.12861e-22
SEC13	1.33535	0.417222	2.32436e-23	6.1489e-22
GIPC1	1.52565	0.609427	2.39834e-23	6.33645e-22
ZXDB	0.690519	-0.534247	2.4529e-23	6.47226e-22
FAM13B	0.669584	-0.578663	2.45892e-23	6.47979e-22
PARD3B	0.459425	-1.1221	2.46523e-23	6.48809e-22
LMNB2	1.5174	0.601599	2.52997e-23	6.64993e-22
FAM47E	0.416003	-1.26533	2.5749e-23	6.75935e-22
PPIH	1.39423	0.479467	2.62455e-23	6.8809e-22
FNDC3A	0.673082	-0.571146	2.64079e-23	6.91462e-22
PDXK	1.51862	0.602761	2.72154e-23	7.11698e-22
GRINL1A	0.757767	-0.400174	2.7719e-23	7.23941e-22
RALGAPA2	0.443624	-1.17259	2.77653e-23	7.24229e-22
SPATA6	0.55567	-0.847698	2.82373e-23	7.35604e-22
EN1	4.01627	2.00585	2.8529e-23	7.4226e-22
GFRA3	3.4823	1.80004	2.89002e-23	7.50964e-22
FAM108A1	1.52011	0.604176	3.04224e-23	7.8952e-22
CENPT	1.48093	0.566507	3.08189e-23	7.98798e-22
DENND4A	0.654193	-0.612211	3.11351e-23	8.05975e-22
CDYL2	0.473522	-1.0785	3.16553e-23	8.18039e-22
TMEM93	1.45076	0.536812	3.1681e-23	8.18039e-22
DMRT1	2.35576	1.23619	3.18919e-23	8.2245e-22
SLC35F5	0.69551	-0.523858	3.22085e-23	8.29572e-22
GRLF1	0.678982	-0.558556	3.30081e-23	8.49098e-22
SON	0.732791	-0.448527	3.32174e-23	8.53413e-22
CBX2	2.65217	1.40717	3.36102e-23	8.62424e-22
ERI2	0.693078	-0.528911	3.46297e-23	8.87473e-22
RHBDF2	1.57029	0.651034	3.48844e-23	8.92884e-22
GAPVD1	0.744771	-0.425131	3.6069e-23	9.22054e-22
GLT25D1	1.39683	0.482156	3.693e-23	9.42889e-22
RG9MTD2	0.71979	-0.474353	3.71776e-23	9.48028e-22
DRD4	2.18013	1.12442	3.75273e-23	9.55757e-22
INO80	0.793741	-0.333259	3.80004e-23	9.66605e-22
SKIV2L2	0.75975	-0.396403	4.06631e-23	1.03305e-21
ZNF776	0.650638	-0.620074	4.0989e-23	1.04004e-21
HHAT	0.559255	-0.838421	4.27509e-23	1.08341e-21
KIAA0586	0.719349	-0.475236	4.32438e-23	1.09365e-21
ZNF417	0.654459	-0.611626	4.32616e-23	1.09365e-21
NCS1	1.74202	0.800758	4.43296e-23	1.11927e-21
AURKAIP1	1.64087	0.714457	4.5375e-23	1.14425e-21
TNKS2	0.69814	-0.518411	4.58837e-23	1.15566e-21
ZNF81	0.608881	-0.715768	4.73312e-23	1.19066e-21
SYTL2	0.431825	-1.21148	4.79831e-23	1.20558e-21
ETFDH	0.739612	-0.435159	4.95336e-23	1.24301e-21
RIN3	1.55856	0.64021	5.02261e-23	1.25885e-21
MEIS3P1	0.618614	-0.692889	5.10808e-23	1.2787e-21
RPP25	1.88034	0.91099	5.4163e-23	1.35421e-21
C17orf106	1.52921	0.612785	5.51488e-23	1.37718e-21
C1orf27	0.698092	-0.518512	5.56757e-23	1.38816e-21
IGF1R	0.417787	-1.25916	5.57243e-23	1.38816e-21
IL32	2.1606	1.11144	5.73809e-23	1.4277e-21
EIF4B	0.743563	-0.427473	5.75837e-23	1.42936e-21
ARID4B	0.725874	-0.46221	5.75873e-23	1.42936e-21
ZNF585B	0.631219	-0.663788	5.81251e-23	1.44097e-21
PTPLAD1	0.662235	-0.594586	6.02639e-23	1.49219e-21
PBX4	2.02976	1.02131	6.13451e-23	1.51713e-21
C1QL4	2.99955	1.58475	6.14418e-23	1.51769e-21
IQCH	0.561071	-0.833744	6.26363e-23	1.54529e-21
GIN1	0.738434	-0.43746	6.271e-23	1.54529e-21
MAN2A1	0.515764	-0.955217	6.6118e-23	1.62731e-21
ATP6V1C2	2.18308	1.12637	6.62036e-23	1.62746e-21
ZNF721	0.71751	-0.478928	6.65131e-23	1.63311e-21
WDR20	0.783096	-0.352738	6.69623e-23	1.64218e-21
ACOT7	1.59188	0.670733	6.92516e-23	1.69629e-21
EMD	1.30956	0.389082	6.93858e-23	1.69755e-21
ARPP19	0.736579	-0.441087	7.05442e-23	1.72383e-21
CBR3	1.91729	0.939071	7.29375e-23	1.7802e-21
SERINC5	0.429523	-1.21919	7.33249e-23	1.78752e-21
RGS19	1.43808	0.524144	7.759e-23	1.88925e-21
ZNF396	0.56739	-0.817587	7.82704e-23	1.90356e-21
MRPL38	1.46763	0.553486	7.89088e-23	1.91681e-21
VPS13D	0.706616	-0.501001	7.98555e-23	1.93751e-21
PRMT1	1.37383	0.458203	8.15466e-23	1.9762e-21
ANKRD42	0.647522	-0.626999	8.29027e-23	2.0067e-21
SOCS1	2.02447	1.01755	8.62171e-23	2.08446e-21
ATAD3B	1.80328	0.850624	8.81261e-23	2.1281e-21
NCLN	1.39192	0.477077	8.93566e-23	2.15528e-21
ZNF442	0.575564	-0.796951	8.95764e-23	2.15804e-21
CPSF4	1.35947	0.443047	9.07838e-23	2.18456e-21
ORAI1	1.45479	0.540812	9.68503e-23	2.32781e-21
PUS1	1.50706	0.591739	9.82774e-23	2.35935e-21
CLPP	1.42821	0.514204	1.0058e-22	2.41179e-21
SH2D2A	2.29003	1.19537	1.0171e-22	2.43604e-21
NUMBL	1.50328	0.588116	1.01924e-22	2.43818e-21
TNFRSF25	2.06519	1.04627	1.02105e-22	2.43818e-21
CAPN7	0.748493	-0.417939	1.02156e-22	2.43818e-21
RUFY2	0.736454	-0.441333	1.09875e-22	2.61936e-21
BUD31	1.36864	0.452741	1.13309e-22	2.69809e-21
DIXDC1	0.615586	-0.699967	1.18969e-22	2.82755e-21
SLC7A8	0.411782	-1.28005	1.19022e-22	2.82755e-21
MREG	0.615183	-0.700911	1.21231e-22	2.87672e-21
TUBB	1.39612	0.481427	1.22063e-22	2.89311e-21
ZBTB6	0.720872	-0.472186	1.2345e-22	2.92259e-21
TCF7L1	2.24385	1.16597	1.24718e-22	2.94922e-21
LMF2	1.45939	0.545367	1.24991e-22	2.95227e-21
SPATA13	0.476416	-1.06971	1.29699e-22	3.05995e-21
TOR1AIP1	0.735517	-0.44317	1.31625e-22	3.10181e-21
ZNF654	0.729674	-0.454677	1.33595e-22	3.14462e-21
TCF12	0.717228	-0.479497	1.35945e-22	3.19626e-21
VPS72	1.37889	0.463507	1.37765e-22	3.23536e-21
STXBP4	0.5931	-0.753653	1.38762e-22	3.25503e-21
CEP350	0.703279	-0.50783	1.39839e-22	3.27654e-21
RTN4R	1.79384	0.843052	1.40617e-22	3.29103e-21
SPTY2D1	0.734547	-0.445073	1.42718e-22	3.33639e-21
RBM18	0.742014	-0.430482	1.42905e-22	3.33695e-21
WDR7	0.731674	-0.450728	1.44803e-22	3.37715e-21
IRF3	1.50639	0.591094	1.44956e-22	3.37715e-21
ZNF510	0.718062	-0.47782	1.46648e-22	3.41268e-21
NCOA2	0.427172	-1.22711	1.51655e-22	3.5252e-21
AURKB	2.17081	1.11824	1.51882e-22	3.52649e-21
JMJD6	1.38668	0.471631	1.54597e-22	3.58545e-21
ERN1	0.456712	-1.13064	1.56922e-22	3.63527e-21
RSBN1L	0.733615	-0.446905	1.58395e-22	3.66524e-21
CDC37	1.36961	0.453766	1.62719e-22	3.76106e-21
TMED10	0.776414	-0.365102	1.65166e-22	3.81332e-21
CGRRF1	0.731875	-0.45033	1.66707e-22	3.84457e-21
CLSTN2	0.262807	-1.92793	1.69594e-22	3.90676e-21
ZMYM2	0.705574	-0.503131	1.77577e-22	4.08606e-21
TRAPPC3	1.26395	0.337934	1.81789e-22	4.1783e-21
C12orf66	0.690297	-0.534711	1.82025e-22	4.17903e-21
ZNF92	0.563147	-0.828415	1.82492e-22	4.18507e-21
PPIB	1.45407	0.540092	1.90045e-22	4.35341e-21
VASN	1.83741	0.877674	1.97746e-22	4.52476e-21
POLR2H	1.38709	0.472066	2.00445e-22	4.58142e-21
DGCR14	1.35114	0.434177	2.02467e-22	4.62248e-21
ARF5	1.404	0.489545	2.02931e-22	4.62791e-21
SH3GL1	1.35094	0.433961	2.05261e-22	4.67129e-21
IFT88	0.678414	-0.559762	2.05289e-22	4.67129e-21
PDS5B	0.721164	-0.471601	2.05644e-22	4.67418e-21
KIAA0040	0.540834	-0.886741	2.09094e-22	4.74733e-21
CYB5D1	0.681296	-0.553646	2.13087e-22	4.83265e-21
EAF1	0.713851	-0.486304	2.1495e-22	4.8695e-21
TUBA1C	1.46417	0.550081	2.16384e-22	4.89659e-21
C17orf49	1.39668	0.482005	2.18022e-22	4.92821e-21
SHROOM3	0.589715	-0.76191	2.18558e-22	4.93489e-21
UBAC1	1.31765	0.397967	2.2326e-22	5.0355e-21
ZNF609	0.707377	-0.499449	2.29729e-22	5.17572e-21
PBRM1	0.711792	-0.490472	2.36935e-22	5.3322e-21
SMG1	0.702174	-0.5101	2.40393e-22	5.40409e-21
CCDC137	1.51143	0.59591	2.41216e-22	5.41666e-21
CPD	0.610569	-0.711773	2.554e-22	5.72889e-21
DDX39	1.53019	0.613715	2.56044e-22	5.73707e-21
RBM12	0.808773	-0.306194	2.58534e-22	5.78653e-21
APPBP2	0.669126	-0.57965	2.60814e-22	5.8312e-21
WDR74	1.45569	0.541706	2.63066e-22	5.87476e-21
IPP	0.671083	-0.575437	2.63336e-22	5.87476e-21
MAP2K2	1.4046	0.490161	2.63982e-22	5.88248e-21
EXD2	0.731918	-0.450245	2.64256e-22	5.88248e-21
LRIG1	0.571545	-0.80706	2.71464e-22	6.03639e-21
EP300	0.69154	-0.532115	2.7328e-22	6.07019e-21
DCAF5	0.756217	-0.403128	2.7885e-22	6.18722e-21
HAUS8	1.47122	0.557017	2.87634e-22	6.37522e-21
KIF3A	0.675633	-0.565689	2.88819e-22	6.39456e-21
RAVER1	1.3074	0.386706	2.93901e-22	6.50007e-21
EIF4G3	0.734666	-0.44484	3.02845e-22	6.69065e-21
PCF11	0.751569	-0.412023	3.14124e-22	6.93236e-21
C6orf136	1.35639	0.439777	3.17694e-22	7.00362e-21
RAB19	0.476407	-1.06973	3.23537e-22	7.12477e-21
MBLAC2	0.669929	-0.57792	3.24893e-22	7.14695e-21
DRAP1	1.56352	0.644801	3.30037e-22	7.25232e-21
RGMA	2.71068	1.43865	3.35197e-22	7.35782e-21
CDCA3	1.94385	0.958914	3.40525e-22	7.46678e-21
HSPBP1	1.51444	0.598786	3.42177e-22	7.49498e-21
NDUFS5	1.48207	0.567611	3.52766e-22	7.71868e-21
TMEM86B	1.65422	0.726147	3.75372e-22	8.20456e-21
MAML3	0.596744	-0.744817	3.85689e-22	8.42108e-21
KIFC3	1.75381	0.81049	3.86269e-22	8.42477e-21
HTRA2	1.27883	0.354824	3.89744e-22	8.49154e-21
MED26	1.29244	0.370094	3.98055e-22	8.65541e-21
GLTPD1	1.48283	0.568355	3.9811e-22	8.65541e-21
MAGI1	0.619872	-0.689957	4.01816e-22	8.72673e-21
SNORD116-20	0.504721	-0.986443	4.06349e-22	8.81584e-21
C1orf64	0.137671	-2.86071	4.09926e-22	8.88404e-21
CCNI	0.669364	-0.579136	4.15335e-22	8.99176e-21
EFHD2	1.53675	0.619882	4.15862e-22	8.99368e-21
ADCY9	0.593201	-0.753407	4.31391e-22	9.31969e-21
DDTL	1.63981	0.713525	4.44948e-22	9.59622e-21
AP3B1	0.784351	-0.350429	4.45127e-22	9.59622e-21
CHCHD6	1.47971	0.565313	4.60453e-22	9.91618e-21
ZNF628	1.49264	0.577862	4.62129e-22	9.94183e-21
CREBL2	0.718224	-0.477494	4.69034e-22	1.00798e-20
C9orf5	0.723886	-0.466166	4.69659e-22	1.00827e-20
SIRT1	0.716096	-0.481776	4.99768e-22	1.07178e-20
KLHL12	0.742046	-0.43042	5.17258e-22	1.10813e-20
MLL2	0.702124	-0.510202	5.28236e-22	1.13047e-20
TMSB15A	3.03406	1.60125	5.31887e-22	1.1371e-20
ANKS1B	0.472636	-1.0812	5.32858e-22	1.13798e-20
BBS10	0.709199	-0.495737	5.34677e-22	1.14068e-20
PLOD3	1.52861	0.612225	5.42699e-22	1.15659e-20
FAM127A	1.46682	0.552693	5.44473e-22	1.15917e-20
WDR44	0.70189	-0.510684	5.49516e-22	1.16869e-20
COMMD10	0.711141	-0.491792	5.53232e-22	1.17537e-20
KLHL8	0.67833	-0.559941	5.54121e-22	1.17605e-20
ATF2	0.635853	-0.653235	5.62048e-22	1.19163e-20
ZNF280D	0.74806	-0.418774	5.68559e-22	1.20419e-20
SNORD116-4	0.323616	-1.62764	5.72566e-22	1.21043e-20
GAPDH	1.55782	0.639532	5.72686e-22	1.21043e-20
ZBTB26	0.630541	-0.665337	5.98351e-22	1.26338e-20
THRB	0.51223	-0.965135	6.38305e-22	1.34635e-20
NXN	1.90486	0.929684	6.50161e-22	1.36995e-20
RAB5B	0.793003	-0.334601	6.65258e-22	1.40032e-20
AP4E1	0.725964	-0.46203	6.69345e-22	1.40748e-20
ZNF598	1.38484	0.469714	6.72912e-22	1.41353e-20
NCK2	1.49065	0.575939	6.79448e-22	1.4258e-20
LY6D	5.2919	2.40379	6.80206e-22	1.42593e-20
CDK16	1.36094	0.4446	7.02538e-22	1.47124e-20
ISOC2	1.50691	0.591598	7.15952e-22	1.4978e-20
TMTC3	0.708501	-0.497159	7.33113e-22	1.53214e-20
TNNI2	2.42472	1.27782	7.73521e-22	1.61494e-20
ZFP106	0.703895	-0.506567	7.94674e-22	1.65742e-20
HTR7P1	0.525706	-0.927671	7.98539e-22	1.66378e-20
IFRD1	1.62707	0.702274	8.02402e-22	1.67014e-20
PRSS27	2.23126	1.15786	8.19995e-22	1.70502e-20
RBM17	1.34847	0.431325	8.28083e-22	1.7201e-20
NUTF2	1.43156	0.517593	8.33961e-22	1.73055e-20
MAD1L1	1.42299	0.50893	8.6269e-22	1.78836e-20
PDE12	0.770565	-0.376012	8.71969e-22	1.80577e-20
C9orf41	0.558226	-0.841077	8.88052e-22	1.83722e-20
CCPG1	0.698462	-0.517747	8.96741e-22	1.85333e-20
ATP5J2	1.48198	0.567523	9.02683e-22	1.86373e-20
MEGF9	0.570017	-0.810923	9.11172e-22	1.87936e-20
GADD45GIP1	1.66094	0.731997	9.46008e-22	1.94925e-20
BRWD1	0.715176	-0.48363	9.77909e-22	2.01296e-20
SIDT1	0.349077	-1.51838	1.0382e-21	2.13492e-20
C6orf129	1.53205	0.61546	1.08867e-21	2.23647e-20
USP38	0.728213	-0.457568	1.13867e-21	2.33684e-20
CSNK1G2	1.38523	0.470125	1.18125e-21	2.4218e-20
ABCD3	0.649597	-0.622384	1.18674e-21	2.43063e-20
MLF2	1.37031	0.454501	1.19553e-21	2.44619e-20
ST8SIA6	0.297686	-1.74814	1.19995e-21	2.45278e-20
TESK1	1.32555	0.406595	1.22346e-21	2.49835e-20
RBM43	0.632582	-0.660675	1.22954e-21	2.50826e-20
SYTL5	0.223348	-2.16264	1.25889e-21	2.56557e-20
APH1B	0.602862	-0.7301	1.29085e-21	2.6281e-20
C10orf32	0.680534	-0.55526	1.29928e-21	2.64264e-20
KIAA0247	0.714299	-0.485399	1.33873e-21	2.72018e-20
TAF1L	0.599134	-0.739049	1.36735e-21	2.77308e-20
DUSP9	3.25551	1.70288	1.36747e-21	2.77308e-20
NCOR1	0.672719	-0.571925	1.37452e-21	2.78463e-20
FAM57A	1.59712	0.675469	1.405e-21	2.84357e-20
PREX1	0.458975	-1.12351	1.40745e-21	2.84572e-20
NDUFB7	1.5719	0.652511	1.41701e-21	2.86223e-20
PRELID1	1.35318	0.436355	1.42341e-21	2.87231e-20
NPNT	0.37848	-1.40171	1.43151e-21	2.88583e-20
METT5D1	0.739389	-0.435595	1.44608e-21	2.91234e-20
KIAA2018	0.685274	-0.545248	1.47632e-21	2.97031e-20
AP1M1	1.25393	0.326458	1.50356e-21	3.02215e-20
WDR85	1.39105	0.476174	1.51542e-21	3.04301e-20
GNL1	1.40108	0.486538	1.53164e-21	3.07257e-20
RCN3	1.93593	0.953025	1.54946e-21	3.10529e-20
FAM19A3	2.865	1.51853	1.55665e-21	3.11664e-20
TBC1D5	0.739533	-0.435314	1.59122e-21	3.18275e-20
CASD1	0.578171	-0.790432	1.59517e-21	3.18755e-20
CLOCK	0.556071	-0.84666	1.64102e-21	3.27598e-20
FMO5	0.357666	-1.48331	1.68007e-21	3.35066e-20
BID	1.44205	0.528118	1.68875e-21	3.3647e-20
PTMA	1.33734	0.41937	1.69978e-21	3.38339e-20
SPRED2	0.625493	-0.676934	1.70832e-21	3.39709e-20
AP2B1	0.677525	-0.561653	1.79325e-21	3.56253e-20
ATF7	0.769176	-0.378614	1.80447e-21	3.58134e-20
SNRPA1	1.43128	0.517309	1.81587e-21	3.60048e-20
A2ML1	6.2495	2.64374	1.84312e-21	3.65099e-20
NDUFS3	1.32004	0.40058	1.85671e-21	3.67434e-20
MPP7	0.466319	-1.10061	1.91674e-21	3.7895e-20
ZNF621	0.735931	-0.442358	1.97949e-21	3.90978e-20
DGCR5	2.57155	1.36264	2.11436e-21	4.17214e-20
BCL7C	1.55704	0.638809	2.13178e-21	4.20248e-20
KIAA1328	0.713098	-0.487828	2.16751e-21	4.26881e-20
RBM10	1.25537	0.328117	2.19494e-21	4.31868e-20
SOS2	0.727979	-0.458031	2.20849e-21	4.34117e-20
ANP32B	1.36394	0.447779	2.22517e-21	4.36978e-20
FOXC1	2.93824	1.55495	2.2875e-21	4.48788e-20
METRNL	1.73668	0.796334	2.30405e-21	4.51602e-20
GPX7	1.82943	0.87139	2.37678e-21	4.65413e-20
MLL5	0.682032	-0.552088	2.4058e-21	4.70646e-20
PRKAR2A	0.525691	-0.927712	2.41389e-21	4.71543e-20
SAP30BP	1.32301	0.403826	2.41498e-21	4.71543e-20
APPL1	0.740602	-0.43323	2.45909e-21	4.79698e-20
PPP4R2	0.607496	-0.719052	2.52014e-21	4.9069e-20
RSPH3	0.705207	-0.503881	2.52022e-21	4.9069e-20
ZNF641	0.610325	-0.712351	2.5599e-21	4.97942e-20
RNF103	0.726069	-0.461822	2.83603e-21	5.51132e-20
FAM89B	1.42262	0.508549	2.94723e-21	5.72198e-20
HPDL	2.78503	1.47769	2.95332e-21	5.72838e-20
VPS36	0.743037	-0.428494	2.95676e-21	5.72964e-20
C19orf62	1.295	0.37295	2.97342e-21	5.75647e-20
SF3B5	1.40419	0.489735	2.97702e-21	5.75801e-20
APBA2	2.45336	1.29476	2.98527e-21	5.76851e-20
FAM120B	0.739374	-0.435623	3.016e-21	5.8224e-20
CMYA5	0.433369	-1.20633	3.03134e-21	5.84277e-20
IDH3G	1.34732	0.430094	3.03224e-21	5.84277e-20
FEM1C	0.712403	-0.489235	3.1821e-21	6.12577e-20
IKZF5	0.730818	-0.452415	3.21031e-21	6.16889e-20
IRS1	0.481147	-1.05545	3.21052e-21	6.16889e-20
MRPL34	1.39376	0.478981	3.2144e-21	6.17056e-20
PDLIM2	1.57638	0.656617	3.28207e-21	6.29457e-20
TAF1	0.71666	-0.48064	3.34603e-21	6.41123e-20
TALDO1	1.37698	0.461511	3.38956e-21	6.4886e-20
LAGE3	1.59604	0.674497	3.40932e-21	6.52032e-20
DUSP23	1.55443	0.636385	3.45728e-21	6.60588e-20
SFRS4	1.26096	0.334526	3.46248e-21	6.60967e-20
EDEM1	0.699567	-0.515465	3.61465e-21	6.89372e-20
ASB8	0.78133	-0.355995	3.62827e-21	6.91328e-20
ZNF268	0.64443	-0.633905	3.64427e-21	6.93732e-20
AGR3	0.110396	-3.17923	3.66414e-21	6.96866e-20
MGAT1	1.30647	0.385678	3.72397e-21	7.0759e-20
C1orf86	1.65219	0.72438	3.75564e-21	7.12945e-20
C16orf52	0.753194	-0.408907	3.84861e-21	7.29919e-20
SNAP23	0.769704	-0.377625	4.1324e-21	7.83017e-20
PTPRG	0.540142	-0.888589	4.20697e-21	7.9641e-20
FBXO36	0.568921	-0.813699	4.28172e-21	8.09507e-20
ANO6	0.706582	-0.501072	4.28404e-21	8.09507e-20
FBXW11	0.761762	-0.392588	4.34761e-21	8.20762e-20
ZFAND2B	1.40407	0.489617	4.43032e-21	8.35607e-20
INO80B	1.67185	0.741449	4.86579e-21	9.16898e-20
C9orf129	0.556603	-0.84528	4.98123e-21	9.37788e-20
TSC22D4	1.41294	0.4987	5.04064e-21	9.48102e-20
TBRG4	1.34673	0.429461	5.10808e-21	9.59907e-20
C6orf211	0.468303	-1.09449	5.12951e-21	9.63051e-20
VKORC1	1.35037	0.433357	5.14344e-21	9.64783e-20
ZNF468	0.677824	-0.561018	5.21827e-21	9.77924e-20
LMNA	1.51994	0.604015	5.33442e-21	9.98779e-20
C19orf66	1.50372	0.588531	5.50321e-21	1.02944e-19
SUCLA2	0.75969	-0.396517	5.71239e-21	1.0676e-19
C1orf159	1.55452	0.636466	5.82059e-21	1.08683e-19
RAB33B	0.725679	-0.462597	5.96375e-21	1.11255e-19
MRPL51	1.36772	0.451777	5.99768e-21	1.11786e-19
STT3B	0.616857	-0.696993	6.01562e-21	1.12018e-19
ASXL2	0.518026	-0.948902	6.02743e-21	1.12136e-19
FABP5	2.31088	1.20844	6.07448e-21	1.12909e-19
EPN1	1.40147	0.486943	6.08876e-21	1.13072e-19
ZNF493	0.61304	-0.705946	6.1025e-21	1.13225e-19
ZNF28	0.669094	-0.57972	6.18578e-21	1.14666e-19
DOCK1	0.688149	-0.539208	6.23035e-21	1.15388e-19
DACH1	0.273001	-1.87302	6.40894e-21	1.18589e-19
EEA1	0.689251	-0.536899	6.41772e-21	1.18644e-19
PDZD8	0.607019	-0.720187	6.4625e-21	1.19364e-19
TACC3	1.62782	0.70294	6.53733e-21	1.20638e-19
BPTF	0.671608	-0.574308	6.55757e-21	1.20902e-19
FDX1L	1.49363	0.578824	6.66516e-21	1.22775e-19
EIF3K	1.37706	0.461591	6.67407e-21	1.22829e-19
KIAA1279	0.763631	-0.389052	6.6825e-21	1.22874e-19
STMN1	1.70186	0.767111	6.78555e-21	1.24657e-19
ANKRD30A	0.116999	-3.09543	6.79701e-21	1.24756e-19
C16orf72	0.78049	-0.357549	6.93182e-21	1.27116e-19
PLEKHJ1	1.46813	0.553975	7.03964e-21	1.28978e-19
RRM2B	0.669357	-0.579153	7.12202e-21	1.30371e-19
ZNF136	0.702512	-0.509406	7.22066e-21	1.32059e-19
TSEN34	1.34131	0.423638	7.33821e-21	1.34089e-19
SF3B14	1.32559	0.406631	7.37841e-21	1.34704e-19
POU5F1	2.05161	1.03675	7.38685e-21	1.34738e-19
GAB1	0.66453	-0.589595	7.41089e-21	1.35056e-19
NT5DC2	1.71768	0.780463	7.58192e-21	1.3805e-19
KCNG2	1.67606	0.745078	7.63557e-21	1.38904e-19
MRPL14	1.4515	0.537544	7.67684e-21	1.39531e-19
TMTC2	0.58391	-0.776183	7.91928e-21	1.4381e-19
NPM2	2.5058	1.32527	8.08047e-21	1.46607e-19
CALR	1.37905	0.463674	8.45778e-21	1.53317e-19
IMPACT	0.722881	-0.46817	8.7787e-21	1.58994e-19
WDR36	0.778257	-0.361682	8.97686e-21	1.62439e-19
NAT1	0.244638	-2.03128	9.28164e-21	1.67806e-19
BBS1	0.669845	-0.5781	9.31079e-21	1.68185e-19
SCO2	1.46706	0.552928	9.65038e-21	1.74166e-19
HIPK3	0.47294	-1.08027	9.79647e-21	1.76647e-19
PHAX	0.781434	-0.355805	1.0206e-20	1.8387e-19
EXOSC5	1.45374	0.539773	1.02853e-20	1.85135e-19
IRAK1	1.49674	0.581821	1.07743e-20	1.93767e-19
HECTD2	0.608166	-0.717462	1.08239e-20	1.94352e-19
RICTOR	0.69412	-0.526744	1.08258e-20	1.94352e-19
PDP2	0.652408	-0.616154	1.10891e-20	1.98906e-19
PRKAR1A	0.728446	-0.457106	1.12239e-20	2.01147e-19
ZNF770	0.710504	-0.493085	1.13799e-20	2.03765e-19
SIRT2	1.30582	0.384954	1.1558e-20	2.06773e-19
ROPN1	4.77661	2.25599	1.18499e-20	2.1181e-19
DTD1	1.52971	0.613256	1.22897e-20	2.1948e-19
MPST	1.58288	0.662551	1.25677e-20	2.24249e-19
TWF1	0.73256	-0.448981	1.27633e-20	2.27542e-19
BTD	0.684264	-0.547374	1.28087e-20	2.28153e-19
CARM1	1.29267	0.37035	1.29277e-20	2.30072e-19
GTF2H4	1.29631	0.374412	1.29495e-20	2.30261e-19
DOM3Z	1.39177	0.476916	1.30326e-20	2.31537e-19
AP2S1	1.381	0.465712	1.32633e-20	2.35432e-19
FAM64A	2.0019	1.00137	1.36246e-20	2.41637e-19
LSR	1.54063	0.623519	1.42813e-20	2.53063e-19
C7orf61	1.90524	0.929976	1.43344e-20	2.53786e-19
PDSS1	1.54549	0.628068	1.44835e-20	2.56204e-19
CHST15	0.612475	-0.707278	1.45533e-20	2.57217e-19
SLC30A9	0.765907	-0.38476	1.47343e-20	2.60191e-19
SEC16A	0.705054	-0.504194	1.50264e-20	2.65121e-19
VPS39	0.792638	-0.335266	1.50395e-20	2.65125e-19
CLDN23	1.83399	0.874983	1.54046e-20	2.71328e-19
NFKBIL1	1.52256	0.606495	1.55571e-20	2.73778e-19
TUBA1B	1.32462	0.405578	1.56708e-20	2.75543e-19
SLC22A5	0.602439	-0.731113	1.57014e-20	2.75843e-19
ETV7	2.19413	1.13365	1.57384e-20	2.76258e-19
LOC100271831	3.7793	1.91812	1.58799e-20	2.78503e-19
PNMA3	2.82813	1.49985	1.6038e-20	2.81035e-19
GREB1L	0.324396	-1.62417	1.6409e-20	2.87291e-19
SLMO1	1.68288	0.750932	1.65249e-20	2.89073e-19
C4orf12	0.581275	-0.782706	1.74963e-20	3.05805e-19
NSUN5	1.39126	0.476396	1.76868e-20	3.08871e-19
CCND1	0.452059	-1.14542	1.77697e-20	3.10054e-19
WDR26	0.774068	-0.369468	1.80379e-20	3.14467e-19
TADA2B	0.748425	-0.41807	1.83326e-20	3.19333e-19
C19orf52	1.29566	0.37369	1.84358e-20	3.20858e-19
ARHGAP4	1.72799	0.789097	1.84628e-20	3.21056e-19
SFRS13B	2.60953	1.38379	1.8636e-20	3.23792e-19
TRIM66	0.635494	-0.654049	1.89363e-20	3.28731e-19
LCA5	0.604674	-0.725771	1.90584e-20	3.30548e-19
KLHDC10	0.634469	-0.656379	1.90732e-20	3.30548e-19
MGEA5	0.78446	-0.350228	1.915e-20	3.316e-19
ZNRD1	1.33667	0.418648	2.00101e-20	3.462e-19
CENPA	2.03904	1.02789	2.01727e-20	3.48718e-19
GCNT4	0.456849	-1.13021	2.03724e-20	3.51875e-19
MIB2	1.68972	0.756781	2.07862e-20	3.5872e-19
BIN1	1.82079	0.864563	2.11623e-20	3.64903e-19
C20orf20	1.38962	0.474694	2.14421e-20	3.69417e-19
GRIK3	0.254471	-1.97443	2.18797e-20	3.7664e-19
MRPL47	1.3534	0.436589	2.1936e-20	3.77292e-19
SIRT7	1.41787	0.503724	2.21206e-20	3.80149e-19
VGLL1	5.69062	2.50858	2.25937e-20	3.87952e-19
GDPD1	0.539733	-0.889683	2.30896e-20	3.95969e-19
APOE	1.95496	0.967136	2.30991e-20	3.95969e-19
NEK10	0.237423	-2.07447	2.32593e-20	3.98382e-19
TNFRSF6B	1.90171	0.9273	2.3329e-20	3.99242e-19
USP53	0.629631	-0.667421	2.34931e-20	4.01714e-19
GMFB	0.74486	-0.424958	2.35853e-20	4.02955e-19
C8orf37	0.631133	-0.663984	2.39557e-20	4.08942e-19
FAM50A	1.47002	0.55584	2.43723e-20	4.15625e-19
PKMYT1	1.8772	0.908585	2.43888e-20	4.15625e-19
KIAA0240	0.712937	-0.488154	2.44263e-20	4.15625e-19
KISS1	2.00249	1.00179	2.44483e-20	4.15625e-19
UBE2M	1.36501	0.448909	2.44636e-20	4.15625e-19
SLC43A3	1.69297	0.759559	2.44688e-20	4.15625e-19
INTS6	0.745212	-0.424278	2.51699e-20	4.27179e-19
SBSN	4.1701	2.06008	2.52516e-20	4.28212e-19
COG6	0.7245	-0.464942	2.55137e-20	4.32298e-19
SEC61B	1.32904	0.410387	2.61152e-20	4.42126e-19
WDR8	1.30315	0.382002	2.64464e-20	4.47363e-19
ADAM10	0.629837	-0.666949	2.66147e-20	4.49839e-19
EXOSC4	1.62327	0.698903	2.68254e-20	4.53027e-19
PIM1	1.76015	0.815701	2.68957e-20	4.5384e-19
SDCCAG1	0.765201	-0.38609	2.73064e-20	4.60391e-19
NUDT12	0.546629	-0.871365	2.80141e-20	4.71935e-19
TMOD1	1.82242	0.865856	2.89684e-20	4.87611e-19
AKR1B1	1.62349	0.699098	2.92579e-20	4.9208e-19
CAB39L	0.594036	-0.751378	2.96219e-20	4.97794e-19
MAPKSP1	0.774389	-0.36887	3.0077e-20	5.05028e-19
PLSCR3	1.40565	0.491236	3.07088e-20	5.14942e-19
RHEB	1.32867	0.409978	3.07177e-20	5.14942e-19
ZNF668	1.39252	0.477703	3.17513e-20	5.31835e-19
PCYOX1	0.722625	-0.468682	3.19312e-20	5.34412e-19
KLHDC1	0.563274	-0.828091	3.1967e-20	5.34574e-19
GPR3	1.86448	0.898771	3.23446e-20	5.40447e-19
ZNF624	0.722156	-0.469617	3.25385e-20	5.4317e-19
CSNK1A1	0.778985	-0.360333	3.25605e-20	5.4317e-19
METTL11A	1.37931	0.463948	3.2642e-20	5.44087e-19
SHOC2	0.725299	-0.463353	3.29058e-20	5.48038e-19
FTL	1.45846	0.544442	3.29749e-20	5.48744e-19
SLC29A4	2.09141	1.06447	3.30958e-20	5.50308e-19
CHODL	3.2139	1.68432	3.37408e-20	5.60369e-19
VAV3	0.44744	-1.16023	3.37555e-20	5.60369e-19
USP12	0.561877	-0.831675	3.42968e-20	5.68894e-19
DDX12	1.65543	0.727204	3.53004e-20	5.85068e-19
SLTM	0.808938	-0.305898	3.5378e-20	5.8588e-19
RYBP	0.76539	-0.385734	3.58294e-20	5.92877e-19
SPPL2A	0.732073	-0.449941	3.5862e-20	5.92938e-19
MCM2	1.5973	0.675635	3.7167e-20	6.1402e-19
HDGFRP2	1.48253	0.568058	3.93904e-20	6.49795e-19
SLC16A10	2.29806	1.20042	3.94112e-20	6.49795e-19
LYAR	1.38476	0.469636	3.94276e-20	6.49795e-19
ZNF799	0.696532	-0.521739	3.99615e-20	6.58066e-19
NARG2	0.745795	-0.423149	4.00612e-20	6.58695e-19
SNHG12	1.63382	0.708245	4.0064e-20	6.58695e-19
UBE2C	2.04492	1.03204	4.0114e-20	6.58989e-19
FBXO3	0.746221	-0.422325	4.02352e-20	6.6045e-19
VPS13C	0.614913	-0.701545	4.116e-20	6.7509e-19
PTPRT	0.187813	-2.41263	4.2239e-20	6.92234e-19
C11orf83	1.6541	0.726049	4.24804e-20	6.95634e-19
TRMT1	1.45332	0.539357	4.3988e-20	7.19747e-19
CHD2	0.771071	-0.375064	4.4933e-20	7.34117e-19
CLN6	1.33735	0.419381	4.49379e-20	7.34117e-19
ADAT1	0.629861	-0.666894	4.50511e-20	7.35381e-19
AASDH	0.749746	-0.415525	4.7015e-20	7.66827e-19
ASGR1	1.82342	0.866647	4.73087e-20	7.71005e-19
SNAI1	1.71278	0.776342	4.75888e-20	7.74953e-19
PCBP3	2.33759	1.22502	4.78778e-20	7.79041e-19
PUS7L	0.688774	-0.537897	4.79703e-20	7.79926e-19
EFCAB4B	0.476065	-1.07077	4.80085e-20	7.79929e-19
MFAP2	1.97494	0.981807	4.81849e-20	7.82105e-19
MBD5	0.725917	-0.462123	4.82187e-20	7.82105e-19
IL34	2.47046	1.30478	4.90678e-20	7.95248e-19
SLC2A10	0.518943	-0.946352	4.96597e-20	8.04205e-19
FKBPL	1.37907	0.463701	5.03479e-20	8.14707e-19
TMCC2	2.26417	1.17898	5.15536e-20	8.33558e-19
TPI1	1.41996	0.505846	5.21452e-20	8.4246e-19
CHST2	1.92474	0.944664	5.25511e-20	8.48348e-19
IER5L	1.79218	0.841716	5.28572e-20	8.52619e-19
PSMC4	1.30629	0.385479	5.29837e-20	8.53988e-19
PPP1R15B	0.77011	-0.376863	5.43942e-20	8.76032e-19
TNRC6A	0.771105	-0.375001	5.50557e-20	8.85991e-19
TMEM26	0.368846	-1.43891	5.53906e-20	8.90682e-19
DENND4C	0.702244	-0.509957	5.60181e-20	9.00065e-19
TRAPPC5	1.58706	0.666354	5.62608e-20	9.03257e-19
ALKBH6	1.46763	0.553489	5.67241e-20	9.09982e-19
PPP3CB	0.789641	-0.340731	5.71318e-20	9.15807e-19
PHC2	1.27382	0.349159	5.72118e-20	9.16373e-19
PRMT10	0.772147	-0.373053	5.83071e-20	9.33187e-19
SART1	1.48435	0.569831	5.85555e-20	9.36431e-19
EFCAB6	0.482609	-1.05107	5.88434e-20	9.40302e-19
GTF2H3	0.677649	-0.56139	6.01504e-20	9.60439e-19
COL9A3	3.51557	1.81376	6.07673e-20	9.68906e-19
ZNF573	0.600226	-0.736422	6.07752e-20	9.68906e-19
LMX1B	0.394574	-1.34163	6.14678e-20	9.79187e-19
GUSBL1	0.577014	-0.793323	6.16442e-20	9.81233e-19
KIAA0196	0.682348	-0.55142	6.25999e-20	9.95673e-19
INADL	0.653345	-0.614084	6.30733e-20	1.00243e-18
ZCCHC4	0.757143	-0.401362	6.37627e-20	1.0126e-18
HMBOX1	0.617775	-0.694847	6.40117e-20	1.01576e-18
SRRM2	0.765195	-0.3861	6.43542e-20	1.02041e-18
ZC3H7A	0.793382	-0.333912	6.57828e-20	1.04226e-18
TMED10P1	0.69398	-0.527034	6.92423e-20	1.09622e-18
ZNF597	0.553287	-0.8539	7.19585e-20	1.13834e-18
PAPL	2.52236	1.33477	7.27604e-20	1.15014e-18
C2orf70	2.30439	1.20439	7.51178e-20	1.1864e-18
VEZT	0.750813	-0.413474	7.51698e-20	1.1864e-18
E2F4	1.30994	0.389495	7.6797e-20	1.21115e-18
TAS2R3	0.740031	-0.434341	7.88676e-20	1.24227e-18
ART3	4.53201	2.18015	7.88917e-20	1.24227e-18
FAHD2A	1.45622	0.542228	7.96765e-20	1.25262e-18
C3orf1	1.23841	0.308485	7.97014e-20	1.25262e-18
CCDC67	2.30367	1.20393	7.97321e-20	1.25262e-18
ZBTB4	0.747253	-0.420332	8.10188e-20	1.27186e-18
DLGAP3	2.17657	1.12205	8.16478e-20	1.28075e-18
NUMB	0.79938	-0.323047	8.22437e-20	1.28911e-18
C17orf68	0.696089	-0.522656	8.32383e-20	1.30371e-18
NUDC	1.34052	0.422791	8.65204e-20	1.35408e-18
MYO9A	0.552843	-0.855059	8.76657e-20	1.37007e-18
LOC402377	0.588987	-0.763693	8.7676e-20	1.37007e-18
SH3D20	1.87428	0.90634	8.78007e-20	1.37097e-18
BCDIN3D	0.763017	-0.390212	9.06667e-20	1.41465e-18
UBN2	0.730087	-0.453859	9.10419e-20	1.41887e-18
ZNF827	0.545637	-0.873986	9.11111e-20	1.41887e-18
ZNF12	0.772734	-0.371957	9.1145e-20	1.41887e-18
SCN7A	0.335579	-1.57528	9.40099e-20	1.46236e-18
B3GNT4	2.10025	1.07056	9.46016e-20	1.47045e-18
EXOC6B	0.540523	-0.887573	9.52188e-20	1.47892e-18
ANKRD58	1.6502	0.722644	9.55875e-20	1.48352e-18
SBNO1	0.52366	-0.933298	9.58363e-20	1.48626e-18
ZNF823	0.690671	-0.53393	9.60067e-20	1.48778e-18
RP9	1.37812	0.462697	9.97611e-20	1.54479e-18
SRFBP1	0.733469	-0.447192	1.01339e-19	1.56804e-18
TEP1	0.730364	-0.453312	1.0199e-19	1.57692e-18
PCNX	0.719132	-0.475672	1.03413e-19	1.59772e-18
NFKB2	1.44667	0.532739	1.03845e-19	1.60319e-18
AP1G1	0.749992	-0.415053	1.04195e-19	1.60738e-18
C13orf27	1.49163	0.576886	1.06687e-19	1.64459e-18
TTYH3	1.52569	0.609458	1.07376e-19	1.65396e-18
FAM199X	0.723833	-0.466271	1.09817e-19	1.69029e-18
TET2	0.707861	-0.498461	1.10356e-19	1.69731e-18
HTT	0.739286	-0.435795	1.11982e-19	1.72104e-18
SIRT6	1.43427	0.520313	1.13945e-19	1.74989e-18
RCOR3	0.711744	-0.490569	1.145e-19	1.75709e-18
C3orf37	1.28128	0.357588	1.14943e-19	1.76258e-18
NCOA4	0.752503	-0.410231	1.16407e-19	1.78369e-18
GABBR2	3.83871	1.94062	1.18626e-19	1.81634e-18
CD7	2.27262	1.18436	1.19217e-19	1.82402e-18
CREBBP	0.75574	-0.404038	1.19655e-19	1.82935e-18
ATRN	0.748531	-0.417865	1.19882e-19	1.83146e-18
ZMYND11	0.763595	-0.38912	1.20092e-19	1.83331e-18
LCMT2	0.732713	-0.44868	1.22777e-19	1.8729e-18
HSPBAP1	1.3191	0.399555	1.23261e-19	1.87889e-18
ZNF611	0.6833	-0.54941	1.23869e-19	1.88675e-18
LSM6	1.31652	0.39673	1.30659e-19	1.9887e-18
MYSM1	0.568237	-0.815436	1.31181e-19	1.99515e-18
FBXL3	0.697212	-0.520331	1.32302e-19	2.01072e-18
GATA3	0.32935	-1.60231	1.33591e-19	2.0288e-18
ZBTB1	0.781925	-0.354899	1.37858e-19	2.09205e-18
TLK1	0.765634	-0.385272	1.38736e-19	2.10382e-18
MIB1	0.703114	-0.508169	1.41955e-19	2.15104e-18
HAUS5	1.38317	0.467974	1.42082e-19	2.15137e-18
RPS16	1.46535	0.551249	1.42414e-19	2.15481e-18
MARVELD2	0.62674	-0.674061	1.45016e-19	2.19257e-18
ARHGEF4	2.33285	1.22209	1.47898e-19	2.23445e-18
TRAF3IP1	0.767792	-0.381213	1.48013e-19	2.23445e-18
HLA-A	1.72616	0.787563	1.48114e-19	2.23445e-18
RHEBL1	1.71978	0.782221	1.48396e-19	2.23706e-18
RAP2B	1.39907	0.48447	1.48729e-19	2.24025e-18
PRLR	0.487119	-1.03766	1.48825e-19	2.24025e-18
P2RY6	1.85331	0.890107	1.50299e-19	2.26077e-18
SLC46A1	0.610112	-0.712853	1.50635e-19	2.26417e-18
C14orf129	0.762904	-0.390426	1.54205e-19	2.31613e-18
CDK3	1.64717	0.719987	1.60349e-19	2.40664e-18
FKBP8	1.44184	0.527915	1.61781e-19	2.42636e-18
SH3D19	0.673577	-0.570086	1.66286e-19	2.49049e-18
TMEM217	1.65888	0.730206	1.663e-19	2.49049e-18
PRPF31	1.35922	0.442783	1.68461e-19	2.52101e-18
PDS5A	0.771926	-0.373465	1.73172e-19	2.58962e-18
OXER1	1.948	0.961996	1.73996e-19	2.59946e-18
TIMM17B	1.41828	0.504145	1.74083e-19	2.59946e-18
FBXW2	0.77819	-0.361806	1.77032e-19	2.64156e-18
ZC3H11A	0.783888	-0.35128	1.79365e-19	2.67443e-18
RAB3GAP2	0.741421	-0.431636	1.8193e-19	2.71071e-18
UTP15	0.784552	-0.350059	1.9347e-19	2.88056e-18
C6orf201	0.600822	-0.73499	1.94477e-19	2.89345e-18
INTS2	0.661016	-0.597242	1.96795e-19	2.92581e-18
DUS1L	1.46685	0.55272	2.03541e-19	3.02392e-18
CLDN12	0.699227	-0.516167	2.0472e-19	3.03923e-18
FRY	0.554934	-0.849611	2.09202e-19	3.10352e-18
FAM131C	2.37327	1.24687	2.11228e-19	3.1313e-18
NAGK	1.33275	0.414402	2.13885e-19	3.16689e-18
TWF2	1.3689	0.453019	2.13937e-19	3.16689e-18
ZXDA	0.714302	-0.485394	2.17967e-19	3.22422e-18
USP32	0.649082	-0.623527	2.18471e-19	3.22934e-18
ARPC1B	1.52899	0.612582	2.18816e-19	3.23211e-18
USP40	0.772994	-0.37147	2.19146e-19	3.23465e-18
COX7B	1.34266	0.425096	2.23399e-19	3.29505e-18
KITLG	0.487483	-1.03658	2.24135e-19	3.30354e-18
PFKP	2.07228	1.05122	2.24955e-19	3.31324e-18
PPP1R14C	3.95496	1.98366	2.25131e-19	3.31345e-18
MIOS	0.776836	-0.364319	2.25538e-19	3.31706e-18
E2F1	1.78823	0.838531	2.26603e-19	3.33034e-18
ACAD9	1.25242	0.324717	2.3091e-19	3.39121e-18
CIB2	2.00204	1.00147	2.31138e-19	3.39212e-18
PCGF1	1.27373	0.34906	2.38122e-19	3.49212e-18
ZNF19	0.715961	-0.482047	2.44417e-19	3.58039e-18
EFR3A	0.689457	-0.536467	2.4449e-19	3.58039e-18
PEX1	0.729833	-0.454362	2.50495e-19	3.66571e-18
AVEN	1.37614	0.460629	2.519e-19	3.68363e-18
RPS7	1.43001	0.516026	2.52276e-19	3.6865e-18
FBXO8	0.795661	-0.329774	2.57944e-19	3.76664e-18
GAL	3.33918	1.73949	2.59771e-19	3.79062e-18
PPP2R5E	0.734471	-0.445222	2.60983e-19	3.8056e-18
LEO1	0.716666	-0.480627	2.61534e-19	3.81092e-18
BIRC6	0.71193	-0.490193	2.62593e-19	3.82364e-18
TSPYL1	0.732338	-0.449418	2.66664e-19	3.88016e-18
ANKLE1	2.00683	1.00492	2.72867e-19	3.96761e-18
B3GNT5	2.28482	1.19208	2.73062e-19	3.96763e-18
TMEM135	0.647556	-0.626924	2.77274e-19	4.02598e-18
SSU72	1.30072	0.379313	2.78723e-19	4.04415e-18
GLCCI1	0.622023	-0.684961	2.78973e-19	4.04492e-18
FKTN	0.727947	-0.458094	2.80465e-19	4.06366e-18
LOC100190986	0.549081	-0.864909	2.81325e-19	4.07325e-18
NOL12	1.38596	0.470886	2.86516e-19	4.14549e-18
COX5A	1.34579	0.42845	2.90156e-19	4.1952e-18
PSMB10	1.61441	0.691009	2.96718e-19	4.28704e-18
C12orf72	0.697437	-0.519866	2.97056e-19	4.2889e-18
MEF2B	2.01557	1.01119	2.99797e-19	4.32543e-18
S1PR2	1.42739	0.513381	3.03761e-19	4.37954e-18
BOLA2	1.4167	0.502531	3.05085e-19	4.39554e-18
EIF5	0.784637	-0.349903	3.09273e-19	4.45275e-18
LY6E	1.90372	0.92882	3.09932e-19	4.4591e-18
POR	1.40741	0.49304	3.15186e-19	4.53152e-18
HN1	1.60488	0.682467	3.18022e-19	4.56908e-18
SURF2	1.48955	0.574878	3.22517e-19	4.63043e-18
FICD	0.667409	-0.583356	3.25987e-19	4.67697e-18
TAP2	1.73944	0.798625	3.2642e-19	4.67731e-18
PAPD4	0.776827	-0.364334	3.26467e-19	4.67731e-18
TRIP12	0.765808	-0.384946	3.27399e-19	4.68706e-18
SNX25	0.691405	-0.532396	3.27605e-19	4.68706e-18
FLJ36031	1.57105	0.651734	3.4878e-19	4.98654e-18
CDC123	1.36686	0.450867	3.49637e-19	4.9953e-18
ASNS	1.64076	0.714361	3.50002e-19	4.99704e-18
MAP4K3	0.752008	-0.411181	3.53058e-19	5.03716e-18
PFDN6	1.45627	0.542274	3.55567e-19	5.06943e-18
CHAC1	2.05555	1.03953	3.60376e-19	5.13442e-18
RNF160	0.688137	-0.539233	3.61399e-19	5.14542e-18
CXorf23	0.738223	-0.437871	3.63518e-19	5.17199e-18
MTCH1	1.28401	0.360656	3.6674e-19	5.21421e-18
ZBTB11	0.774731	-0.368233	3.75935e-19	5.34125e-18
B3GAT3	1.46621	0.552095	3.79159e-19	5.38332e-18
CCNT2	0.735044	-0.444097	3.84981e-19	5.46221e-18
FAM171A1	2.16552	1.11471	3.94827e-19	5.59802e-18
CEP97	0.632112	-0.661749	3.97428e-19	5.63101e-18
ZNF701	0.692173	-0.530796	4.02645e-19	5.70099e-18
ZC3H18	1.32661	0.407746	4.05895e-19	5.74303e-18
FSD1	2.51977	1.33329	4.07546e-19	5.76242e-18
BMS1P4	0.612039	-0.708305	4.08068e-19	5.76582e-18
ZNF41	0.718736	-0.476465	4.16608e-19	5.88243e-18
ARPC5L	1.31403	0.393993	4.18743e-19	5.90851e-18
DONSON	1.50773	0.592375	4.20448e-19	5.92849e-18
ACOT9	1.54089	0.623766	4.2294e-19	5.95953e-18
SNRPD2	1.3444	0.426963	4.29407e-19	6.0465e-18
FOXP1	0.66209	-0.5949	4.29823e-19	6.04821e-18
C18orf21	1.3128	0.392646	4.55533e-19	6.40558e-18
SAFB	1.23519	0.304732	4.80385e-19	6.75041e-18
DNAJC14	0.814095	-0.296731	4.88368e-19	6.85789e-18
CRYBB3	1.5123	0.596748	4.94347e-19	6.9371e-18
KLHDC4	1.49383	0.579015	5.13533e-19	7.20141e-18
PTGES2	1.39834	0.483716	5.16639e-19	7.24001e-18
H1FX	1.49294	0.578159	5.22836e-19	7.32185e-18
LDHB	2.12582	1.08802	5.25154e-19	7.34929e-18
HRASLS	2.91006	1.54105	5.28749e-19	7.39455e-18
FAM115A	0.600821	-0.734993	5.31988e-19	7.43477e-18
CCR10	1.7849	0.835842	5.41798e-19	7.56673e-18
ESRRA	1.46294	0.548869	5.47485e-19	7.63599e-18
KIFC1	1.77613	0.82874	5.47503e-19	7.63599e-18
TRIM65	1.38342	0.468244	5.49957e-19	7.66501e-18
CMBL	0.437631	-1.19221	5.63317e-19	7.84587e-18
USP7	0.804945	-0.313038	5.67972e-19	7.90534e-18
TCF15	2.06816	1.04835	5.92264e-19	8.23785e-18
GSPT1	0.77898	-0.360342	5.96621e-19	8.29283e-18
WDR46	1.32011	0.400653	6.09075e-19	8.4602e-18
MAPT	0.292651	-1.77275	6.1031e-19	8.47162e-18
FXYD6	1.7803	0.832122	6.15076e-19	8.532e-18
TOR1AIP2	0.646781	-0.628651	6.1791e-19	8.56551e-18
C16orf80	1.29772	0.375982	6.24639e-19	8.65294e-18
STX10	1.39629	0.481595	6.35754e-19	8.80096e-18
BIRC5	2.0373	1.02666	6.52546e-19	9.02733e-18
APBA3	1.41482	0.500624	6.59336e-19	9.1151e-18
ABCD1	1.53195	0.615373	6.60521e-19	9.12534e-18
ERGIC1	0.679312	-0.557855	6.69159e-19	9.23656e-18
KRT86	2.92156	1.54674	6.69473e-19	9.23656e-18
LOC146880	1.38391	0.468746	6.78778e-19	9.35865e-18
SIGMAR1	1.3913	0.476436	6.89058e-19	9.494e-18
MYO6	0.653135	-0.614546	6.90256e-19	9.50412e-18
C9orf100	1.59858	0.676793	6.92575e-19	9.52964e-18
ANUBL1	0.649878	-0.62176	7.03852e-19	9.67831e-18
SCUBE2	0.220607	-2.18045	7.05234e-19	9.69082e-18
TMSB15B	2.22007	1.1506	7.19275e-19	9.87714e-18
MRPS9	1.29373	0.371539	7.38204e-19	1.01303e-17
ARPC4	1.23249	0.301578	7.52061e-19	1.03135e-17
TSTD2	0.659181	-0.601254	7.60756e-19	1.04238e-17
CCDC132	0.736136	-0.441956	7.6112e-19	1.04238e-17
TYMP	1.82537	0.868187	7.66469e-19	1.04901e-17
PGR	0.188835	-2.4048	7.69334e-19	1.05223e-17
ACTB	1.32197	0.402691	7.82467e-19	1.06948e-17
NPB	2.03441	1.02461	7.86374e-19	1.0741e-17
PPP2R3B	1.53074	0.614232	7.94005e-19	1.0838e-17
CHD9	0.662435	-0.594149	7.96214e-19	1.08609e-17
CPNE3	0.699539	-0.515524	8.0096e-19	1.09184e-17
MRPL9	1.32644	0.407561	8.10698e-19	1.10438e-17
C1orf25	0.749378	-0.416235	8.16947e-19	1.11215e-17
CRNKL1	0.753731	-0.407878	8.27663e-19	1.12599e-17
NUDT5	1.41957	0.505458	8.46898e-19	1.1514e-17
DENND1B	0.487058	-1.03783	8.48151e-19	1.15234e-17
THUMPD1	0.75926	-0.397333	8.65779e-19	1.17551e-17
DPM3	1.61036	0.687383	8.73956e-19	1.18583e-17
ZNF699	0.532704	-0.908595	8.75356e-19	1.18694e-17
SLC30A1	0.646244	-0.62985	8.79226e-19	1.1914e-17
UBE2H	0.731539	-0.450993	8.89945e-19	1.20513e-17
S100A2	3.65729	1.87077	8.94683e-19	1.21033e-17
TMEM160	1.66513	0.735638	8.9497e-19	1.21033e-17
KCP	1.77992	0.831812	8.95914e-19	1.21081e-17
TOM1L1	0.602141	-0.731826	9.01103e-19	1.21683e-17
C10orf114	2.01533	1.01101	9.01551e-19	1.21683e-17
KIF27	0.62085	-0.687683	9.05006e-19	1.22069e-17
NHSL2	0.496987	-1.00872	9.10308e-19	1.22703e-17
GPC2	2.34257	1.22809	9.2543e-19	1.24659e-17
PAN3	0.73474	-0.444694	9.27127e-19	1.24806e-17
LOC100129034	0.696531	-0.521741	9.29206e-19	1.25004e-17
SNX8	1.36643	0.450412	9.41032e-19	1.26512e-17
VAMP5	1.55731	0.639055	9.43131e-19	1.26711e-17
FETUB	1.59993	0.678009	9.47327e-19	1.27191e-17
PPP1R14A	2.30737	1.20625	9.54001e-19	1.28003e-17
GLYR1	0.786943	-0.345669	9.82253e-19	1.31708e-17
NOP16	1.4363	0.522359	9.88955e-19	1.3252e-17
GUSBL2	1.41981	0.505696	1.01332e-18	1.35697e-17
AAGAB	0.764485	-0.38744	1.01448e-18	1.35763e-17
RERG	0.409929	-1.28655	1.01716e-18	1.36032e-17
TMEM161B	0.722643	-0.468644	1.01842e-18	1.36112e-17
SLC40A1	0.373938	-1.41913	1.02573e-18	1.37e-17
BMPR2	0.718388	-0.477165	1.0389e-18	1.38669e-17
UBXN10	0.392402	-1.3496	1.04029e-18	1.38765e-17
CDKN2D	1.52847	0.612085	1.05075e-18	1.40044e-17
FLNB	0.67222	-0.572994	1.05126e-18	1.40044e-17
MLPH	0.289215	-1.78979	1.06318e-18	1.41541e-17
SYDE2	0.521732	-0.93862	1.06953e-18	1.42294e-17
LMO4	1.95915	0.970229	1.07404e-18	1.42802e-17
C20orf27	1.50796	0.592596	1.09084e-18	1.44941e-17
TEAD4	1.56937	0.650185	1.09554e-18	1.45471e-17
GPR35	1.60202	0.67989	1.10016e-18	1.45991e-17
LOC728323	0.582176	-0.780472	1.10413e-18	1.46374e-17
TRMT61A	1.4649	0.550804	1.10448e-18	1.46374e-17
VGF	2.53893	1.34422	1.11452e-18	1.4761e-17
FAM63A	0.629134	-0.66856	1.12776e-18	1.49267e-17
TSC1	0.778115	-0.361944	1.13693e-18	1.50383e-17
TCF3	1.38638	0.471328	1.14197e-18	1.50952e-17
SOCS6	0.696423	-0.521963	1.16544e-18	1.53955e-17
BANP	1.28695	0.363954	1.16925e-18	1.54359e-17
ABHD8	1.45435	0.540377	1.17108e-18	1.54501e-17
STARD13	0.647126	-0.627881	1.17608e-18	1.55061e-17
LEMD2	1.27392	0.349279	1.17937e-18	1.55395e-17
POC1B	0.748081	-0.418734	1.18393e-18	1.55895e-17
ARMC6	1.34128	0.423615	1.19996e-18	1.57905e-17
ROPN1B	4.0203	2.0073	1.21445e-18	1.59709e-17
AGR2	0.167555	-2.57729	1.21592e-18	1.598e-17
LONRF2	0.307318	-1.7022	1.25664e-18	1.65046e-17
COX6B1	1.38415	0.469002	1.27856e-18	1.67817e-17
HEBP2	1.4707	0.556507	1.29418e-18	1.69758e-17
RAD54L	1.85712	0.893069	1.29738e-18	1.70069e-17
FARP2	0.716422	-0.481118	1.30849e-18	1.71416e-17
MED13	0.684278	-0.547346	1.33226e-18	1.74419e-17
CTNND1	0.749457	-0.416082	1.35611e-18	1.77428e-17
TTC17	0.726628	-0.46071	1.36139e-18	1.78005e-17
KCNH1	0.331145	-1.59447	1.37539e-18	1.79722e-17
ACVR2B	0.69759	-0.519548	1.38601e-18	1.80993e-17
C1orf35	1.49549	0.580622	1.39243e-18	1.81717e-17
PRRC1	0.775969	-0.365929	1.39767e-18	1.82284e-17
POU4F1	2.74319	1.45585	1.42039e-18	1.85129e-17
C11orf84	1.39834	0.483719	1.42936e-18	1.8618e-17
KIAA1949	1.44147	0.527542	1.43123e-18	1.86305e-17
SCHIP1	1.68501	0.752754	1.45221e-18	1.88916e-17
JMJD4	1.42615	0.512125	1.50819e-18	1.96074e-17
CC2D1B	1.24631	0.317658	1.51024e-18	1.96216e-17
FEM1B	0.752823	-0.409618	1.54478e-18	2.00577e-17
ITM2C	1.82621	0.868853	1.59389e-18	2.06822e-17
CXorf49B	3.07469	1.62044	1.59672e-18	2.07059e-17
ZNF414	1.41533	0.501136	1.60759e-18	2.08336e-17
CD70	2.04554	1.03248	1.61215e-18	2.08795e-17
DDX3X	0.799044	-0.323654	1.61855e-18	2.09492e-17
HERC3	0.641171	-0.641218	1.62541e-18	2.10247e-17
KCTD18	0.797166	-0.327048	1.63179e-18	2.10939e-17
HES4	2.08426	1.05953	1.64157e-18	2.1207e-17
RBBP5	0.685867	-0.544	1.66533e-18	2.15004e-17
BTG3	1.81482	0.859826	1.68576e-18	2.17505e-17
CAMKV	2.29297	1.19722	1.70601e-18	2.19979e-17
TMEM147	1.36281	0.446587	1.71325e-18	2.20774e-17
COPS4	0.81225	-0.300005	1.74781e-18	2.25085e-17
SHPRH	0.558344	-0.840773	1.77272e-18	2.28018e-17
GTF3C6	1.3822	0.466963	1.77374e-18	2.28018e-17
H2BFXP	1.94044	0.956382	1.77392e-18	2.28018e-17
ZNHIT1	1.43786	0.523921	1.8354e-18	2.35772e-17
OLFM2	2.07665	1.05426	1.84188e-18	2.36457e-17
MOAP1	0.729374	-0.455268	1.87655e-18	2.40758e-17
RNASEL	0.69699	-0.520791	1.91103e-18	2.45027e-17
EBNA1BP2	1.29354	0.37132	1.92265e-18	2.46364e-17
GPR160	0.48559	-1.04219	1.96704e-18	2.51894e-17
ATP2B1	0.689157	-0.537096	1.97295e-18	2.52493e-17
ATP1B3	1.448	0.534064	1.97474e-18	2.52564e-17
GPD2	0.680512	-0.555307	1.98377e-18	2.53562e-17
KIAA1267	0.772277	-0.37281	2.03557e-18	2.60021e-17
EPHB6	2.41519	1.27214	2.04609e-18	2.61201e-17
ZNF236	0.719175	-0.475586	2.04795e-18	2.61276e-17
AMY1A	3.34662	1.74271	2.0525e-18	2.61694e-17
DIP2B	0.726043	-0.461874	2.05818e-18	2.62255e-17
PLEKHM2	1.26994	0.344757	2.07352e-18	2.64046e-17
ANKFY1	0.792962	-0.334677	2.11234e-18	2.68822e-17
FAM172A	0.735823	-0.44257	2.11805e-18	2.69267e-17
RENBP	1.80324	0.850592	2.11847e-18	2.69267e-17
ZFYVE1	0.788406	-0.342989	2.19888e-18	2.79315e-17
ZSWIM4	1.47677	0.562449	2.23022e-18	2.83121e-17
DDN	2.24834	1.16886	2.25036e-18	2.855e-17
MYB	0.413667	-1.27346	2.3094e-18	2.92809e-17
LAG3	2.27367	1.18502	2.31383e-18	2.9319e-17
KCNK5	2.56752	1.36037	2.32914e-18	2.94947e-17
NEDD4	0.650838	-0.61963	2.34918e-18	2.97301e-17
LOC284232	0.621089	-0.687127	2.40366e-18	3.04009e-17
USP46	0.74573	-0.423274	2.41111e-18	3.0473e-17
CBR4	0.694303	-0.526362	2.41234e-18	3.0473e-17
LOC145837	0.303449	-1.72047	2.45236e-18	3.09596e-17
MSLN	5.47968	2.45409	2.45649e-18	3.09926e-17
BCL2	0.462549	-1.11232	2.50858e-18	3.16304e-17
RASSF4	1.74782	0.805559	2.53346e-18	3.19243e-17
C15orf61	1.35081	0.43383	2.60774e-18	3.28402e-17
LOC606724	1.84673	0.884976	2.6146e-18	3.29064e-17
CENPC1	0.763502	-0.389296	2.66491e-18	3.3519e-17
C14orf118	0.73354	-0.447053	2.66886e-18	3.35481e-17
TIRAP	0.734758	-0.444658	2.69866e-18	3.39019e-17
CKS2	1.55855	0.640209	2.71434e-18	3.4078e-17
POLR1E	1.41023	0.495934	2.73474e-18	3.43085e-17
C10orf12	0.66127	-0.596689	2.73605e-18	3.43085e-17
CXXC4	0.486633	-1.0391	2.74321e-18	3.43773e-17
GRPR	0.22356	-2.16127	2.75743e-18	3.45344e-17
TGOLN2	0.760517	-0.394948	2.76439e-18	3.46004e-17
MED30	1.44958	0.53563	2.79218e-18	3.4927e-17
BANF1	1.34294	0.4254	2.81044e-18	3.51292e-17
CA9	4.96289	2.31118	2.81178e-18	3.51292e-17
KLHL20	0.760644	-0.394707	2.89764e-18	3.61799e-17
DBN1	1.49501	0.580153	2.9304e-18	3.65667e-17
ST14	1.55837	0.640039	2.93321e-18	3.65795e-17
ZNF800	0.729657	-0.45471	2.94635e-18	3.6721e-17
ZNF568	0.701096	-0.512317	2.98385e-18	3.71658e-17
DHX40	0.705331	-0.503627	3.05271e-18	3.80004e-17
RPL39L	1.81568	0.860512	3.05792e-18	3.80253e-17
COMTD1	1.81555	0.860405	3.05842e-18	3.80253e-17
ANGEL2	0.766251	-0.38411	3.06941e-18	3.81389e-17
ZNF430	0.617913	-0.694525	3.16049e-18	3.92468e-17
ACTR8	0.809948	-0.304099	3.17877e-18	3.94498e-17
GTF3C5	1.31868	0.399093	3.18285e-18	3.94766e-17
ATG4B	1.29447	0.372359	3.23609e-18	4.01126e-17
COPE	1.39484	0.480095	3.27891e-18	4.06188e-17
C19orf48	1.47461	0.560338	3.30062e-18	4.08631e-17
MRPL36	1.3555	0.438829	3.31409e-18	4.10051e-17
PTP4A3	1.5501	0.632358	3.33971e-18	4.12972e-17
ZDHHC17	0.749696	-0.415623	3.35538e-18	4.1466e-17
KIAA0319L	0.716237	-0.481491	3.40961e-18	4.21107e-17
IARS2	0.754855	-0.405729	3.43934e-18	4.24523e-17
STK32B	0.360792	-1.47076	3.48622e-18	4.30051e-17
SLC4A7	0.566475	-0.819916	3.5017e-18	4.31701e-17
IGF2BP3	2.45992	1.29861	3.51168e-18	4.32671e-17
GSTP1	2.1116	1.07834	3.60191e-18	4.43522e-17
DCP1A	0.78615	-0.347123	3.62294e-18	4.45844e-17
SRPK2	0.748886	-0.417183	3.64754e-18	4.48601e-17
SMOC1	3.45795	1.78992	3.66661e-18	4.50676e-17
ZNF627	0.75557	-0.404362	3.71627e-18	4.56507e-17
TUBA4A	1.87896	0.909936	3.72204e-18	4.56942e-17
RNF122	1.46907	0.554906	3.72976e-18	4.57615e-17
EPHX3	2.27636	1.18673	3.73687e-18	4.58214e-17
C7orf55	1.46976	0.555585	3.81834e-18	4.67924e-17
RCCD1	1.4622	0.548139	4.01497e-18	4.91726e-17
SUPT5H	1.30017	0.378702	4.05456e-18	4.96278e-17
RAD23A	1.29812	0.376423	4.10461e-18	5.02105e-17
HDGF	1.34175	0.424116	4.20773e-18	5.14411e-17
RRP9	1.37198	0.456255	4.222e-18	5.15849e-17
BCL2A1	2.22636	1.15468	4.25308e-18	5.19336e-17
CHMP1A	1.33332	0.415022	4.32636e-18	5.27971e-17
ALG10B	0.672668	-0.572033	4.46937e-18	5.45098e-17
TMEM161A	1.40087	0.486318	4.61089e-18	5.6176e-17
CACNA1D	0.396547	-1.33444	4.61146e-18	5.6176e-17
GBF1	0.810566	-0.302998	4.65426e-18	5.66637e-17
MFI2	2.37532	1.24812	4.6777e-18	5.69153e-17
CLTC	0.687617	-0.540323	4.71169e-18	5.72949e-17
THOP1	1.43274	0.518775	4.78063e-18	5.80987e-17
FAM20C	1.65677	0.728374	4.87488e-18	5.9209e-17
PRDX3	0.761234	-0.393588	4.90924e-18	5.9591e-17
FLJ35024	1.98798	0.991303	4.98301e-18	6.04506e-17
ZNF490	0.789377	-0.341213	5.11004e-18	6.19551e-17
SLC44A4	0.217604	-2.20022	5.11699e-18	6.20027e-17
CCDC88B	1.83481	0.875634	5.15135e-18	6.23707e-17
RCOR1	0.764185	-0.388007	5.15345e-18	6.23707e-17
HERC1	0.703987	-0.50638	5.17496e-18	6.25942e-17
CARS2	1.37295	0.457276	5.17807e-18	6.25948e-17
ZNF445	0.770937	-0.375314	5.18823e-18	6.26807e-17
MAN2B1	1.36937	0.453514	5.26267e-18	6.35425e-17
SYNRG	0.745833	-0.423075	5.3004e-18	6.39604e-17
MAN1A2	0.672981	-0.571363	5.3196e-18	6.41544e-17
TRIM69	1.64813	0.720832	5.32629e-18	6.41973e-17
COG2	0.745928	-0.422893	5.39199e-18	6.49509e-17
CDC25B	1.61709	0.693396	5.50009e-18	6.62143e-17
CDH24	1.50033	0.585285	5.51205e-18	6.63192e-17
FRMPD2	0.489083	-1.03185	5.66256e-18	6.80902e-17
SOLH	1.39307	0.478266	5.75005e-18	6.91017e-17
RPL13	1.52005	0.604115	5.78674e-18	6.95019e-17
ARL2	1.39617	0.481477	5.83897e-18	7.00882e-17
ARRB2	1.32475	0.405716	5.86277e-18	7.03326e-17
2021-03-06	0.730632	-0.452783	5.89149e-18	7.05833e-17
HLA-B	1.68889	0.756079	5.89245e-18	7.05833e-17
BMI1	0.668173	-0.581707	5.89399e-18	7.05833e-17
EARS2	0.771818	-0.373667	5.91855e-18	7.0836e-17
WNT10A	2.29162	1.19637	6.11975e-18	7.32014e-17
RPL35	1.49447	0.579632	6.12655e-18	7.324e-17
ROCK1	0.697968	-0.518768	6.16168e-18	7.36169e-17
GJB3	3.43206	1.77907	6.16857e-18	7.36564e-17
ZNF192	0.48224	-1.05218	6.29604e-18	7.51347e-17
CPSF2	0.787119	-0.345347	6.31405e-18	7.53058e-17
IQGAP2	0.484111	-1.04659	6.32634e-18	7.54085e-17
TUBA8	1.55931	0.640912	6.4502e-18	7.68402e-17
RPS6KB2	1.40498	0.49055	6.66552e-18	7.93592e-17
RAB11FIP2	0.755847	-0.403834	6.7584e-18	8.03984e-17
S100A3	1.79117	0.840903	6.76065e-18	8.03984e-17
SLC19A1	1.46563	0.551519	6.77544e-18	8.05276e-17
RHCG	3.50783	1.81058	6.91067e-18	8.20873e-17
MIA3	0.714765	-0.484459	6.92092e-18	8.21614e-17
LIN52	0.721308	-0.471312	6.99928e-18	8.30435e-17
ABHD2	0.582516	-0.779632	7.03691e-18	8.34417e-17
BRWD3	0.609363	-0.714627	7.04258e-18	8.34607e-17
ALKBH4	1.30498	0.384024	7.10436e-18	8.41442e-17
CRELD2	1.49966	0.584637	7.27248e-18	8.60857e-17
DDX17	0.820757	-0.284972	7.42145e-18	8.77983e-17
FAM26F	1.99117	0.993619	7.427e-18	8.78133e-17
LOC144438	0.796639	-0.328003	7.52278e-18	8.88946e-17
ANKRD39	1.41275	0.498509	7.56254e-18	8.93129e-17
RAPH1	0.686929	-0.541767	7.61372e-18	8.98656e-17
KLHDC2	0.756338	-0.402897	7.66362e-18	9.04025e-17
TAF6L	1.32573	0.406783	7.67756e-18	9.05149e-17
GOLGA5	0.793187	-0.334268	7.77402e-18	9.15995e-17
TBC1D7	1.40025	0.485685	7.77979e-18	9.16147e-17
ACYP2	1.44128	0.527349	7.78921e-18	9.1673e-17
LOC642846	1.58098	0.660816	7.8859e-18	9.27578e-17
BBS2	0.759193	-0.397461	7.92419e-18	9.31546e-17
PEX11A	0.608272	-0.717211	7.93424e-18	9.32194e-17
CPT1A	0.64461	-0.633502	8.02101e-18	9.41849e-17
RPS21	1.48122	0.566786	8.05165e-18	9.44905e-17
BCL11A	3.36727	1.75158	8.17159e-18	9.58432e-17
ATG16L1	0.74257	-0.4294	8.31485e-18	9.74677e-17
UBR2	0.738338	-0.437647	8.43904e-18	9.8867e-17
ERCC6	0.732217	-0.449658	8.6098e-18	1.0081e-16
MAP3K2	0.669045	-0.579825	8.64112e-18	1.01119e-16
SLC16A3	1.82538	0.868195	8.79525e-18	1.02864e-16
C2orf79	1.37884	0.463453	8.8171e-18	1.0306e-16
C6orf115	1.56273	0.644065	8.97998e-18	1.04905e-16
CTSZ	1.4123	0.498043	9.05807e-18	1.05757e-16
KIAA0556	0.732783	-0.448542	9.10799e-18	1.06279e-16
NBPF10	0.540018	-0.88892	9.11547e-18	1.06306e-16
DUSP16	0.688293	-0.538904	9.14989e-18	1.06593e-16
POP4	1.32228	0.403031	9.15051e-18	1.06593e-16
ARID1A	0.771619	-0.374039	9.16366e-18	1.06686e-16
RSPRY1	0.656282	-0.607612	9.33639e-18	1.08635e-16
USP30	0.767336	-0.382069	9.34632e-18	1.08689e-16
WDR77	1.29089	0.368366	9.49647e-18	1.10372e-16
PRKCSH	1.32312	0.403941	9.60663e-18	1.11589e-16
DNLZ	1.62991	0.704796	9.61901e-18	1.1167e-16
PRG2	1.99043	0.993082	9.75645e-18	1.13201e-16
MRPL23	1.50291	0.587758	9.80734e-18	1.13715e-16
COX15	0.829038	-0.27049	9.8118e-18	1.13715e-16
TOP2B	0.78403	-0.35102	9.84688e-18	1.14057e-16
ATP5D	1.59876	0.67695	9.93188e-18	1.14977e-16
ZNF322A	0.777922	-0.362303	1.00667e-17	1.16472e-16
SLC2A6	1.85894	0.894482	1.03513e-17	1.19696e-16
GPR98	0.270976	-1.88376	1.05438e-17	1.21855e-16
GSDMC	2.88631	1.52923	1.09108e-17	1.26024e-16
SF3B1	0.810725	-0.302716	1.09971e-17	1.26888e-16
KIAA0100	0.711154	-0.491766	1.09979e-17	1.26888e-16
HR	2.49246	1.31757	1.11593e-17	1.28678e-16
NDUFB6	1.29574	0.373778	1.12369e-17	1.29499e-16
NOS1AP	0.463896	-1.10813	1.12444e-17	1.29512e-16
TMEM87A	0.768182	-0.38048	1.12727e-17	1.29766e-16
MON1A	1.29172	0.36929	1.13489e-17	1.3057e-16
PHF19	1.44322	0.529292	1.13837e-17	1.30897e-16
ZNF428	1.47248	0.55825	1.16028e-17	1.33341e-16
AK2	1.28319	0.35974	1.16117e-17	1.33358e-16
MARCO	3.61377	1.85351	1.16172e-17	1.33358e-16
ZNF616	0.732022	-0.45004	1.17384e-17	1.34673e-16
OGFR	1.49073	0.57602	1.2148e-17	1.39295e-16
QRICH2	1.71562	0.778728	1.25881e-17	1.4426e-16
GALR2	1.47627	0.56196	1.29807e-17	1.48677e-16
KIAA0776	0.729624	-0.454775	1.34288e-17	1.53723e-16
FAM101A	2.40882	1.26833	1.35558e-17	1.5509e-16
CHUK	0.793633	-0.333456	1.36402e-17	1.55969e-16
NRGN	1.62176	0.697562	1.40816e-17	1.60888e-16
AVL9	0.680734	-0.554837	1.40861e-17	1.60888e-16
KRT222	0.626229	-0.675238	1.42907e-17	1.63134e-16
ZNF689	0.567443	-0.817453	1.42997e-17	1.63146e-16
TMEM150C	0.348661	-1.5201	1.45566e-17	1.65984e-16
MRPS22	1.22374	0.291295	1.46785e-17	1.67281e-16
ANKRD31	0.64628	-0.629768	1.49519e-17	1.70303e-16
LOC285629	2.14036	1.09786	1.49787e-17	1.70513e-16
RASGEF1C	2.5358	1.34244	1.51799e-17	1.72707e-16
ISG20	1.72429	0.786006	1.52346e-17	1.73234e-16
ELP2	0.606262	-0.721987	1.52464e-17	1.73272e-16
ZNF264	0.733493	-0.447146	1.54053e-17	1.74981e-16
ZFPL1	1.33421	0.415983	1.56274e-17	1.77405e-16
C5orf42	0.676028	-0.564844	1.57126e-17	1.78273e-16
MEA1	1.31233	0.392129	1.57721e-17	1.78849e-16
DHDH	2.02829	1.02027	1.58217e-17	1.79312e-16
PGLS	1.39742	0.482761	1.59422e-17	1.80578e-16
RECQL4	1.71268	0.776258	1.61236e-17	1.82532e-16
ANAPC11	1.48394	0.569434	1.61502e-17	1.82733e-16
UGDH	0.583287	-0.777722	1.61644e-17	1.82792e-16
MRPL55	1.4853	0.570754	1.64263e-17	1.85652e-16
BCLAF1	0.795235	-0.330547	1.64408e-17	1.85713e-16
BECN1	0.771586	-0.374101	1.70697e-17	1.92711e-16
SLC39A10	0.718965	-0.476007	1.71448e-17	1.93452e-16
C14orf102	0.796382	-0.328468	1.7239e-17	1.94408e-16
TM9SF3	0.808584	-0.30653	1.72491e-17	1.94415e-16
DPY30	1.2789	0.3549	1.73034e-17	1.9492e-16
DCPS	1.3661	0.450066	1.73724e-17	1.95566e-16
RAB6C	0.631602	-0.662911	1.73798e-17	1.95566e-16
IFI27L1	1.54654	0.629041	1.74195e-17	1.95905e-16
SP3	0.772193	-0.372967	1.74803e-17	1.9648e-16
NOP2	1.40551	0.491098	1.74906e-17	1.96489e-16
C3orf26	1.36551	0.449436	1.78638e-17	2.00571e-16
BCAS1	0.260204	-1.94229	1.81038e-17	2.03155e-16
SLC15A1	3.4147	1.77176	1.82677e-17	2.04882e-16
IL20RB	1.89007	0.918441	1.84364e-17	2.06661e-16
SIVA1	1.43365	0.519698	1.85472e-17	2.0779e-16
RNF8	1.3207	0.401303	1.86452e-17	2.08773e-16
C5orf44	0.793649	-0.333427	1.89541e-17	2.12117e-16
ZNF134	0.683104	-0.549823	1.92031e-17	2.14785e-16
SEC22C	0.805021	-0.312901	1.92306e-17	2.14976e-16
MYL6B	1.43556	0.521618	1.9656e-17	2.19611e-16
ZNF486	0.426073	-1.23083	1.98624e-17	2.21797e-16
SORCS1	0.246997	-2.01744	2.00396e-17	2.23654e-16
RFXANK	1.40101	0.486465	2.00966e-17	2.24168e-16
ZNF20	0.758958	-0.397908	2.04675e-17	2.28181e-16
SMOX	1.75734	0.813394	2.07972e-17	2.31731e-16
C12orf45	1.37643	0.46093	2.12831e-17	2.37016e-16
MID2	0.688101	-0.539307	2.13314e-17	2.37424e-16
SNRPD1	1.31863	0.399043	2.13757e-17	2.37789e-16
NEBL	0.576947	-0.793488	2.14876e-17	2.38804e-16
C7orf47	1.52276	0.606687	2.14903e-17	2.38804e-16
HIP1	0.64601	-0.630372	2.17168e-17	2.41191e-16
MIPOL1	0.618139	-0.693997	2.17993e-17	2.41976e-16
PLDN	0.809647	-0.304634	2.20663e-17	2.44807e-16
CHTF18	1.62164	0.69745	2.23875e-17	2.48236e-16
SCARB2	0.768662	-0.379579	2.24211e-17	2.48475e-16
THAP7	1.43334	0.51938	2.25317e-17	2.49565e-16
CDS1	0.681196	-0.553858	2.25687e-17	2.4984e-16
PRRX2	1.86567	0.899692	2.2829e-17	2.52585e-16
ELF2	0.810615	-0.302911	2.29433e-17	2.53712e-16
UBE2J2	1.29	0.367373	2.30414e-17	2.54661e-16
MTAP	1.50619	0.590908	2.34379e-17	2.58903e-16
PSMB9	1.83343	0.874544	2.36178e-17	2.6075e-16
PTS	1.35109	0.434123	2.38299e-17	2.6295e-16
PRR18	2.05592	1.03979	2.39401e-17	2.64023e-16
RNF6	0.752012	-0.411172	2.39978e-17	2.64517e-16
CHEK2	1.43889	0.524958	2.4362e-17	2.68388e-16
PTGIR	1.59649	0.674901	2.4482e-17	2.69565e-16
MCM3	1.36276	0.446529	2.53278e-17	2.78728e-16
CTCF	0.841239	-0.249413	2.57229e-17	2.82925e-16
TIGD6	0.778211	-0.361767	2.60987e-17	2.86904e-16
NPEPPS	0.736758	-0.440738	2.684e-17	2.94895e-16
HRAS	1.53749	0.620574	2.72701e-17	2.9946e-16
LPAR2	1.39264	0.477826	2.73984e-17	3.00707e-16
RNF14	0.79096	-0.338322	2.76523e-17	3.03332e-16
TMBIM4	0.697726	-0.519268	2.77801e-17	3.04571e-16
MBLAC1	1.56149	0.642923	2.79574e-17	3.06351e-16
GPR161	1.82493	0.867845	2.88656e-17	3.16134e-16
B3GNT7	1.93282	0.950708	2.93965e-17	3.21776e-16
ZNF197	0.776237	-0.365431	2.95537e-17	3.23324e-16
LTBR	1.35244	0.435562	2.98497e-17	3.26389e-16
PRKG1	0.468677	-1.09333	3.01304e-17	3.29282e-16
IKBKG	1.32044	0.401016	3.0897e-17	3.3748e-16
GJC2	1.67734	0.746174	3.11269e-17	3.39811e-16
CHCHD10	1.60184	0.679732	3.17976e-17	3.46947e-16
GNRHR	0.631845	-0.662358	3.29143e-17	3.58941e-16
UBE2W	0.73529	-0.443615	3.2993e-17	3.59608e-16
ADNP	0.750685	-0.41372	3.38232e-17	3.68461e-16
NAIP	0.582425	-0.779856	3.42824e-17	3.73265e-16
TAF11	1.27166	0.346713	3.43654e-17	3.7397e-16
NOC4L	1.3689	0.453016	3.47132e-17	3.77554e-16
ZFX	0.68577	-0.544203	3.49896e-17	3.80359e-16
TUBB4	1.762	0.817218	3.50467e-17	3.80778e-16
NPM3	1.61669	0.69304	3.51571e-17	3.81775e-16
HCFC2	0.755014	-0.405424	3.54058e-17	3.84272e-16
NCRNA00116	1.61154	0.688442	3.54982e-17	3.85071e-16
KIF13B	0.567665	-0.816888	3.59103e-17	3.89336e-16
AUP1	1.26448	0.338545	3.59294e-17	3.89336e-16
MRPS18A	1.29387	0.371698	3.62864e-17	3.92998e-16
USP37	0.746796	-0.421213	3.6386e-17	3.93868e-16
TMED8	0.785839	-0.347694	3.67999e-17	3.98138e-16
FAF1	1.2647	0.338797	3.69771e-17	3.99844e-16
TROAP	1.82764	0.869986	3.72026e-17	4.02071e-16
SYBU	0.442287	-1.17694	3.72559e-17	4.02434e-16
DTYMK	1.37594	0.460417	3.79666e-17	4.09896e-16
MGAT5	0.473722	-1.07789	3.82475e-17	4.12711e-16
ZNF675	0.691503	-0.532192	3.90086e-17	4.20701e-16
TRIT1	1.30249	0.381276	3.91426e-17	4.21925e-16
C5orf30	0.616684	-0.697398	3.91706e-17	4.22005e-16
C9orf25	1.35006	0.43302	3.94067e-17	4.24325e-16
CSDA	1.74512	0.803325	4.00531e-17	4.31059e-16
PRTFDC1	1.96565	0.975005	4.02785e-17	4.33258e-16
MAGI3	0.63071	-0.664952	4.05853e-17	4.36329e-16
REPS2	0.49239	-1.02213	4.10266e-17	4.40842e-16
SAPS3	0.786645	-0.346216	4.1164e-17	4.42087e-16
S100A4	1.68527	0.752979	4.15404e-17	4.45896e-16
PINX1	1.38765	0.472645	4.16738e-17	4.47094e-16
DUSP18	0.77107	-0.375066	4.22313e-17	4.52838e-16
FOSL1	2.17276	1.11953	4.23811e-17	4.54176e-16
NCAM2	0.339612	-1.55804	4.24004e-17	4.54176e-16
DUS3L	1.42711	0.513096	4.29661e-17	4.59996e-16
ZNF546	0.709891	-0.494331	4.32761e-17	4.63073e-16
NSUN5P1	1.66893	0.738927	4.35869e-17	4.66155e-16
KIAA0415	1.37164	0.455903	4.3679e-17	4.66897e-16
ANKRD40	0.759773	-0.39636	4.39193e-17	4.6922e-16
FBXW5	1.36393	0.447774	4.45753e-17	4.75981e-16
PPP1R3G	1.70484	0.769636	4.5216e-17	4.82571e-16
FXYD7	1.73247	0.792828	4.53837e-17	4.84108e-16
ANKRD30B	0.234708	-2.09106	4.58259e-17	4.88572e-16
NOC2L	1.34975	0.432694	4.63435e-17	4.93833e-16
RRN3	0.785365	-0.348565	4.68248e-17	4.98702e-16
KIAA1033	0.753526	-0.408272	4.69025e-17	4.9927e-16
ZNF44	0.712636	-0.488763	4.7145e-17	5.01591e-16
ZNF224	0.710972	-0.492135	4.7327e-17	5.03267e-16
CDKN2AIP	0.772224	-0.372909	4.78312e-17	5.08365e-16
DUSP2	1.67797	0.746717	4.78682e-17	5.08494e-16
C19orf29	1.34457	0.427147	4.82364e-17	5.12141e-16
NSF	0.750366	-0.414334	4.88113e-17	5.17976e-16
CEACAM19	1.99558	0.99681	4.89875e-17	5.19576e-16
NMI	1.49629	0.58139	4.90375e-17	5.19838e-16
ZNF813	0.576054	-0.795724	4.91778e-17	5.21056e-16
GPR172A	1.47784	0.563489	4.96953e-17	5.26267e-16
C19orf53	1.37551	0.459967	5.06862e-17	5.36416e-16
PANX2	2.15483	1.10757	5.07233e-17	5.36416e-16
PRDX5	1.42603	0.512009	5.07322e-17	5.36416e-16
PARD6B	0.480723	-1.05672	5.09789e-17	5.38747e-16
B4GALNT1	2.05883	1.04183	5.13954e-17	5.42869e-16
MGA	0.73583	-0.442555	5.17733e-17	5.46579e-16
ZMYND15	1.68479	0.752566	5.19048e-17	5.47686e-16
EFNB1	1.44933	0.53539	5.23101e-17	5.51677e-16
GLI3	0.55552	-0.848089	5.28071e-17	5.56633e-16
SLC7A5	2.12784	1.08939	5.32049e-17	5.60538e-16
DNMBP	0.604355	-0.726533	5.35501e-17	5.63885e-16
DNTTIP1	1.30023	0.378768	5.5607e-17	5.85243e-16
VPRBP	0.793794	-0.333163	5.60091e-17	5.89174e-16
PDLIM7	1.50033	0.585277	5.82034e-17	6.11941e-16
CORO1A	1.74264	0.801274	5.8481e-17	6.14545e-16
TTC5	0.781083	-0.356453	5.88974e-17	6.18604e-16
PXK	0.668688	-0.580594	5.92284e-17	6.21761e-16
C19orf12	1.33427	0.416046	5.99302e-17	6.28807e-16
CYP20A1	0.808299	-0.307039	6.10083e-17	6.39792e-16
SETX	0.765382	-0.385748	6.11436e-17	6.40882e-16
DHFRL1	0.748495	-0.417935	6.14226e-17	6.43478e-16
TMEM54	1.44319	0.529265	6.17359e-17	6.46429e-16
SDF2L1	1.5526	0.634687	6.2633e-17	6.55488e-16
PCDH1	0.667418	-0.583337	6.34437e-17	6.63634e-16
ATXN7	0.75842	-0.398932	6.37964e-17	6.66983e-16
CCKBR	2.87717	1.52465	6.42149e-17	6.71016e-16
HIPK1	0.740538	-0.433355	6.44107e-17	6.7272e-16
S100A6	1.84101	0.880501	6.52666e-17	6.81311e-16
ZNF221	0.588077	-0.765923	6.57203e-17	6.85698e-16
RPF2	1.38246	0.467239	6.6864e-17	6.97276e-16
NDUFS1	0.778373	-0.361466	6.80858e-17	7.09657e-16
LYSMD4	1.45009	0.536141	6.82272e-17	7.10769e-16
ALKBH8	0.749802	-0.415419	6.90344e-17	7.18814e-16
SCXB	1.74309	0.801646	6.95981e-17	7.24315e-16
PDE9A	2.03865	1.02761	7.0966e-17	7.38176e-16
ZNF561	0.792969	-0.334664	7.16076e-17	7.44472e-16
BAK1	1.33434	0.41613	7.16694e-17	7.44737e-16
SEMA5A	0.548572	-0.866248	7.28201e-17	7.56311e-16
PHKB	0.734389	-0.445384	7.33081e-17	7.60994e-16
TOM1L2	0.702296	-0.50985	7.41039e-17	7.68865e-16
HHLA3	1.46496	0.550862	7.52316e-17	7.80171e-16
ZNF763	0.649016	-0.623675	7.64062e-17	7.91951e-16
NDUFA4L2	1.84974	0.887322	7.64953e-17	7.92333e-16
HDHD2	0.772377	-0.372623	7.65203e-17	7.92333e-16
FGD1	1.54451	0.627153	7.66288e-17	7.93056e-16
UXS1	1.26234	0.336105	7.7119e-17	7.97491e-16
C1orf212	1.2327	0.301816	7.71351e-17	7.97491e-16
RC3H1	0.786987	-0.345588	7.77633e-17	8.0358e-16
ITGB1BP2	1.54544	0.628015	7.7821e-17	8.03771e-16
IFI30	1.57323	0.653728	7.79257e-17	8.04448e-16
PPP6C	0.812142	-0.300197	7.81896e-17	8.06766e-16
C16orf7	1.42225	0.508174	7.89048e-17	8.13736e-16
NUFIP2	0.744418	-0.425815	8.07981e-17	8.32842e-16
TMEM149	1.54751	0.629949	8.09394e-17	8.33879e-16
LOC388955	1.34585	0.428518	8.10645e-17	8.34711e-16
ITCH	0.791723	-0.336932	8.11016e-17	8.34711e-16
ARHGEF1	1.38529	0.470189	8.13032e-17	8.36366e-16
NBPF3	0.637187	-0.650211	8.13993e-17	8.36935e-16
C21orf58	1.5462	0.628725	8.15802e-17	8.38374e-16
ZIC4	2.65412	1.40824	8.22168e-17	8.44493e-16
PREX2	0.426107	-1.23071	8.41542e-17	8.63712e-16
TUSC1	1.40284	0.48835	8.41721e-17	8.63712e-16
[truncated: 11,981 more rows]

## Sheet: CESC
Table2. Differential expression genes related CDKN2A in TCGA-CESC
id	fc	log2fc	pvalue	padj
CDKN2A	6.39416	2.67676	2.80204e-29	5.74473e-25
C9orf53	3.13609	1.64897	5.53352e-25	5.67241e-21
KIAA0232	0.540397	-0.887908	1.52106e-21	1.03949e-17
ZNF652	0.607803	-0.718323	3.86188e-17	1.97941e-13
DPY19L3	0.363965	-1.45813	5.25517e-17	2.15483e-13
EFR3B	0.245287	-2.02746	1.18886e-16	4.06235e-13
GCC2	0.555352	-0.848526	2.14004e-16	6.18998e-13
ARFGEF2	0.573792	-0.801401	2.41537e-16	6.18998e-13
TYMP	3.18639	1.67192	3.19196e-16	7.27128e-13
DCTN3	1.61667	0.693023	4.97509e-16	1.01999e-12
N4BP2	0.331036	-1.59494	6.55081e-16	1.22095e-12
BOD1L	0.556621	-0.845233	8.58542e-16	1.43222e-12
CPD	0.440524	-1.18271	9.08146e-16	1.43222e-12
KIAA1737	0.562608	-0.829798	1.06353e-15	1.55747e-12
SPATA13	0.242268	-2.04533	1.5021e-15	2.05307e-12
SECISBP2L	0.550507	-0.861167	2.16755e-15	2.77744e-12
INTS2	0.583044	-0.778324	2.84932e-15	3.43628e-12
CEBPD	2.27832	1.18797	3.76796e-15	4.29171e-12
PIK3C2A	0.584271	-0.77529	4.49153e-15	4.60876e-12
SEC23IP	0.645851	-0.630726	4.50895e-15	4.60876e-12
WDR31	0.345077	-1.53501	4.7207e-15	4.60876e-12
RALGAPA2	0.296287	-1.75493	6.77456e-15	5.9598e-12
ARHGAP12	0.544677	-0.876528	6.83933e-15	5.9598e-12
OAZ1	1.54904	0.631379	6.97664e-15	5.9598e-12
PDXDC1	0.597174	-0.743778	1.36883e-14	1.12255e-11
CENPP	2.21049	1.14437	1.44637e-14	1.14051e-11
ZNF192	0.264532	-1.91849	1.62987e-14	1.22867e-11
C9orf89	1.7112	0.775011	1.74222e-14	1.22867e-11
RGPD4	0.557785	-0.84222	1.76441e-14	1.22867e-11
TRADD	1.7036	0.768584	1.79788e-14	1.22867e-11
UBR3	0.670361	-0.576989	2.14481e-14	1.41848e-11
ARMC2	0.496275	-1.01079	2.22873e-14	1.42792e-11
HSPB1	3.02173	1.59538	2.37576e-14	1.47599e-11
KIAA0754	0.258797	-1.95011	2.7582e-14	1.66319e-11
NBR1	0.723897	-0.466144	2.84052e-14	1.66389e-11
FAM193A	0.678839	-0.558858	4.25571e-14	2.398e-11
RAB11FIP2	0.62996	-0.666667	4.35887e-14	2.398e-11
FAM73A	0.533388	-0.906744	4.44463e-14	2.398e-11
SCO2	2.1031	1.07252	5.12628e-14	2.69485e-11
ZKSCAN1	0.480578	-1.05716	5.8545e-14	3.00072e-11
ERLIN2	0.62144	-0.686314	6.49402e-14	3.24732e-11
SLC30A9	0.651326	-0.618548	7.55682e-14	3.68881e-11
CDKN2BAS	3.08381	1.62471	9.52392e-14	4.54091e-11
HRAS	1.85373	0.890428	1.00759e-13	4.60376e-11
ZYG11B	0.698988	-0.51666	1.01048e-13	4.60376e-11
TAOK1	0.379288	-1.39864	1.11493e-13	4.90773e-11
PDE3A	0.170545	-2.55178	1.14217e-13	4.90773e-11
SURF2	1.73197	0.792411	1.16415e-13	4.90773e-11
RNF126	1.60928	0.686417	1.17295e-13	4.90773e-11
PCMTD2	0.600535	-0.735681	1.29046e-13	5.17852e-11
TUBA1C	1.57061	0.651328	1.29749e-13	5.17852e-11
MED27	1.54034	0.623253	1.31345e-13	5.17852e-11
PTTG1	1.85797	0.893727	1.428e-13	5.38492e-11
NCOA6	0.660186	-0.599055	1.47722e-13	5.38492e-11
TRAPPC3	1.31238	0.392182	1.48206e-13	5.38492e-11
TBCK	0.611953	-0.708508	1.50448e-13	5.38492e-11
ANGEL1	0.602757	-0.730352	1.51852e-13	5.38492e-11
LOC647979	0.677257	-0.562224	1.52339e-13	5.38492e-11
PREX2	0.236146	-2.08225	1.58726e-13	5.51559e-11
TBC1D12	0.6478	-0.626379	1.62327e-13	5.54673e-11
C12orf51	0.621678	-0.68576	1.66129e-13	5.58356e-11
PRPF4B	0.718888	-0.476161	1.88968e-13	6.24873e-11
USP34	0.699234	-0.516153	2.00422e-13	6.52232e-11
PARD3B	0.26791	-1.90018	2.10074e-13	6.63672e-11
SEMA4G	0.299803	-1.73791	2.10412e-13	6.63672e-11
UBR1	0.581613	-0.781868	2.55328e-13	7.9314e-11
LOC100130776	1.93502	0.952349	2.6383e-13	8.07321e-11
TIGD4	0.359584	-1.4756	2.81906e-13	8.49946e-11
ZNF514	0.55848	-0.840423	2.93143e-13	8.61116e-11
EIF2C4	0.562476	-0.830136	2.94011e-13	8.61116e-11
PCYOX1	0.668546	-0.5809	3.02696e-13	8.74068e-11
NR2C2AP	1.60293	0.680712	3.18265e-13	9.06261e-11
PHF12	0.703137	-0.508121	3.33523e-13	9.2658e-11
ARFGEF1	0.663863	-0.591042	3.38264e-13	9.2658e-11
CBR3	3.07096	1.61869	3.3896e-13	9.2658e-11
PIKFYVE	0.609691	-0.713849	3.55342e-13	9.58581e-11
RPL35	1.89122	0.919316	3.75645e-13	1.00019e-10
ZDHHC12	1.5618	0.643207	4.06238e-13	1.06241e-10
MLL3	0.604863	-0.725319	4.09376e-13	1.06241e-10
PHF3	0.665338	-0.58784	4.64971e-13	1.19161e-10
NUDT1	1.83139	0.872941	5.82283e-13	1.47382e-10
EXD2	0.655828	-0.60861	6.03579e-13	1.50909e-10
MIER3	0.653207	-0.614388	6.59791e-13	1.62041e-10
ZNF397	0.606857	-0.720572	6.63909e-13	1.62041e-10
MGC16384	0.450525	-1.15032	7.05582e-13	1.70033e-10
EVI5	0.664015	-0.590712	7.17022e-13	1.70033e-10
CASC4	0.615378	-0.700456	7.21532e-13	1.70033e-10
LOC100190986	0.354823	-1.49483	7.30345e-13	1.70154e-10
ZNF828	0.608275	-0.717204	7.83912e-13	1.76939e-10
DIXDC1	0.432644	-1.20875	7.84539e-13	1.76939e-10
RAPGEF2	0.605172	-0.724582	7.85358e-13	1.76939e-10
CCNJ	0.563678	-0.827056	8.00347e-13	1.78356e-10
TSPYL3	0.306768	-1.70478	8.18831e-13	1.80513e-10
RUNDC2C	0.423008	-1.24124	8.3368e-13	1.81831e-10
STT3B	0.483403	-1.0487	9.01152e-13	1.94478e-10
GDPD1	0.382056	-1.38814	9.42462e-13	2.01275e-10
ZNF292	0.617691	-0.695043	1.0944e-12	2.30429e-10
PDZD8	0.442047	-1.17773	1.10145e-12	2.30429e-10
LRP6	0.535267	-0.90167	1.17192e-12	2.41394e-10
NBEAL1	0.429372	-1.2197	1.17742e-12	2.41394e-10
REST	0.31028	-1.68836	1.33457e-12	2.70905e-10
APTX	1.44705	0.533113	1.36594e-12	2.74553e-10
BCL9	0.573132	-0.80306	1.39518e-12	2.77709e-10
AGAP1	0.565302	-0.822907	1.42266e-12	2.80455e-10
PML	1.75331	0.810084	1.45493e-12	2.82752e-10
LOC642587	8.91993	3.15703	1.46189e-12	2.82752e-10
TRRAP	0.652832	-0.615216	1.50341e-12	2.88065e-10
SOX5	0.285538	-1.80824	1.58463e-12	3.00817e-10
ZNF704	0.28862	-1.79276	1.66935e-12	3.13991e-10
C19orf60	1.68086	0.749195	1.72221e-12	3.19543e-10
CDKN2B	2.87587	1.524	1.7359e-12	3.19543e-10
TTC3	0.644475	-0.633803	1.74563e-12	3.19543e-10
ROCK2	0.437625	-1.19223	1.79753e-12	3.26133e-10
KLHL11	0.3981	-1.3288	1.8225e-12	3.27762e-10
PARP12	1.72226	0.784305	1.85271e-12	3.30297e-10
PREPL	0.627852	-0.671503	1.92163e-12	3.37117e-10
LYSMD2	1.73935	0.798548	1.92385e-12	3.37117e-10
TMEM184C	0.661563	-0.596049	2.06268e-12	3.56674e-10
ZMYM2	0.633484	-0.658619	2.07024e-12	3.56674e-10
BIRC6	0.668314	-0.581403	2.24979e-12	3.84376e-10
UBE2S	1.83296	0.874173	2.36947e-12	4.01478e-10
NBPF9	0.378462	-1.40178	2.41834e-12	4.064e-10
ATF2	0.526352	-0.925899	2.47174e-12	4.11996e-10
KIF3A	0.615475	-0.700228	2.80761e-12	4.64206e-10
BRPF3	0.609649	-0.713948	2.91218e-12	4.77644e-10
IDE	0.55209	-0.857026	2.97717e-12	4.84429e-10
AXIN2	0.264031	-1.92122	3.13632e-12	5.06066e-10
ODF3B	2.32043	1.21439	3.15952e-12	5.06066e-10
RHOG	1.51156	0.596043	3.25995e-12	5.18104e-10
C19orf43	1.58807	0.667274	3.38859e-12	5.34407e-10
MYSM1	0.44778	-1.15914	3.44933e-12	5.39834e-10
COMTD1	1.95999	0.970849	3.58939e-12	5.57438e-10
TRAF3IP1	0.606906	-0.720455	3.6162e-12	5.57438e-10
SFN	3.65733	1.87079	3.73837e-12	5.71971e-10
NAA40	0.663543	-0.591739	4.04406e-12	6.14158e-10
DAAM2	0.330631	-1.59671	4.09399e-12	6.17169e-10
PEF1	1.37702	0.461546	4.34603e-12	6.49224e-10
KLHL23	0.313795	-1.67211	4.36996e-12	6.49224e-10
PPIA	1.48801	0.573387	4.548e-12	6.70813e-10
SORL1	0.33766	-1.56636	4.68549e-12	6.86156e-10
IFT81	0.532662	-0.908709	4.71898e-12	6.8616e-10
TOP1	0.659839	-0.599814	5.04545e-12	7.28463e-10
TM9SF3	0.706118	-0.502019	5.24937e-12	7.52605e-10
EP400	0.731948	-0.450187	5.49749e-12	7.82706e-10
EXOSC3	1.42245	0.508382	6.1284e-12	8.66513e-10
ZNF518A	0.548216	-0.867183	6.44689e-12	8.95981e-10
TRAPPC5	1.67358	0.742936	6.46686e-12	8.95981e-10
NDUFB6	1.48723	0.572633	6.4837e-12	8.95981e-10
SHPRH	0.359619	-1.47546	6.51162e-12	8.95981e-10
PRKG1	0.335402	-1.57603	6.55663e-12	8.96161e-10
MYST4	0.593894	-0.751724	6.70132e-12	9.09871e-10
ARPC5L	1.48158	0.567136	7.03724e-12	9.49194e-10
ACADSB	0.533131	-0.907439	7.13212e-12	9.55705e-10
THUMPD1	0.731568	-0.450937	7.32051e-12	9.74579e-10
TMEM160	2.03809	1.02722	7.55138e-12	9.98829e-10
RUNDC1	0.730068	-0.453897	7.7178e-12	1.0143e-09
PSMB7	1.54086	0.623737	8.26235e-12	1.07544e-09
CDK12	0.726535	-0.460895	8.28792e-12	1.07544e-09
LOC641298	0.350611	-1.51206	8.38518e-12	1.08121e-09
ZNF445	0.647704	-0.626593	8.84323e-12	1.13315e-09
CCDC121	0.587142	-0.768219	9.17102e-12	1.16785e-09
SRRM2	0.654005	-0.612626	9.26708e-12	1.1728e-09
PPIH	1.43992	0.525993	9.44541e-12	1.18804e-09
VPS13C	0.545718	-0.873773	9.60511e-12	1.20076e-09
SIRT1	0.625639	-0.676598	1.02139e-11	1.26249e-09
PTPRG	0.325231	-1.62046	1.02221e-11	1.26249e-09
RALGAPB	0.692726	-0.529644	1.07197e-11	1.31602e-09
MIIP	1.53309	0.616443	1.08175e-11	1.32012e-09
WDR60	0.637978	-0.648422	1.16917e-11	1.41646e-09
GNA15	2.77771	1.47389	1.17964e-11	1.41646e-09
ZCCHC11	0.571954	-0.806029	1.18142e-11	1.41646e-09
SMARCAD1	0.655092	-0.61023	1.27885e-11	1.52435e-09
SLC2A10	0.253374	-1.98066	1.31809e-11	1.56205e-09
PSMG1	1.53476	0.618015	1.35308e-11	1.59431e-09
TCF12	0.604868	-0.725309	1.37134e-11	1.60658e-09
ATRX	0.657471	-0.605002	1.39452e-11	1.62445e-09
C19orf66	1.66381	0.734488	1.46851e-11	1.69115e-09
STXBP4	0.575238	-0.79777	1.47245e-11	1.69115e-09
PSMD9	1.36633	0.450303	1.47652e-11	1.69115e-09
TAF1L	0.469763	-1.09	1.4973e-11	1.70454e-09
DCHS1	0.430874	-1.21466	1.50484e-11	1.70454e-09
REV3L	0.557819	-0.84213	1.52767e-11	1.72089e-09
ARID4A	0.675188	-0.566638	1.54227e-11	1.72785e-09
TXN	1.84243	0.881613	1.59275e-11	1.77471e-09
RGPD3	0.522931	-0.935309	1.60774e-11	1.78173e-09
EP300	0.632821	-0.660131	1.62921e-11	1.79581e-09
CLEC2B	4.122	2.04334	1.69421e-11	1.85747e-09
C3orf54	3.32099	1.73161	1.75813e-11	1.9173e-09
TREX1	1.80906	0.855238	1.7848e-11	1.9359e-09
MAGOH	1.41739	0.503235	1.79407e-11	1.9359e-09
MYO9A	0.459501	-1.12186	1.81641e-11	1.94974e-09
DCAF7	0.689096	-0.537222	1.92303e-11	2.05343e-09
DIDO1	0.690265	-0.534778	1.98697e-11	2.1062e-09
MLH3	0.718134	-0.477674	1.99299e-11	2.1062e-09
KIF3B	0.660214	-0.598995	2.03182e-11	2.13623e-09
C14orf174	0.42955	-1.2191	2.06074e-11	2.15558e-09
MLL2	0.620912	-0.68754	2.1417e-11	2.22889e-09
AMIGO1	0.437643	-1.19217	2.16666e-11	2.24348e-09
TNRC6A	0.721272	-0.471384	2.19308e-11	2.25942e-09
DOHH	1.64412	0.717312	2.23561e-11	2.29173e-09
ZNF678	0.517781	-0.949585	2.2803e-11	2.3259e-09
STK36	0.551745	-0.857927	2.30434e-11	2.33879e-09
CMTM4	0.541873	-0.883973	2.34803e-11	2.37139e-09
C12orf70	2.50646	1.32565	2.43649e-11	2.44867e-09
USP54	0.542745	-0.881653	2.47278e-11	2.47302e-09
GOSR1	0.807033	-0.309301	2.50552e-11	2.48712e-09
ZC3H13	0.625419	-0.677105	2.51114e-11	2.48712e-09
TMSB10	1.77343	0.826539	2.52919e-11	2.49295e-09
PSME2	1.72451	0.78619	2.62922e-11	2.56751e-09
NEK8	0.587315	-0.767793	2.62988e-11	2.56751e-09
MFAP3L	0.297152	-1.75073	2.68338e-11	2.60732e-09
ALS2CR8	0.548859	-0.865493	2.72444e-11	2.63474e-09
ZFHX3	0.525635	-0.927866	2.75709e-11	2.65379e-09
BCLAF1	0.766187	-0.384232	2.80783e-11	2.69001e-09
HN1	1.66062	0.731724	2.83549e-11	2.70387e-09
TADA2B	0.720103	-0.473724	2.85019e-11	2.7053e-09
GIGYF2	0.691075	-0.533085	2.87058e-11	2.7121e-09
DHX15	0.738593	-0.437149	2.89033e-11	2.71824e-09
DUT	1.54333	0.626043	2.93303e-11	2.7458e-09
LOC646851	0.347821	-1.52358	2.95219e-11	2.75117e-09
MAP1A	0.404296	-1.30651	3.10435e-11	2.86924e-09
KRT14	29.8255	4.89848	3.10688e-11	2.86924e-09
FNIP2	0.388497	-1.36402	3.13294e-11	2.88034e-09
RAB11FIP3	0.578462	-0.789707	3.25742e-11	2.98141e-09
TNKS	0.644957	-0.632726	3.43125e-11	3.10871e-09
PHACTR1	0.445448	-1.16667	3.43891e-11	3.10871e-09
HIPK3	0.349171	-1.518	3.45528e-11	3.10871e-09
NBPF15	0.509506	-0.97283	3.45716e-11	3.10871e-09
C20orf112	0.415322	-1.2677	3.51492e-11	3.14685e-09
POP7	1.45964	0.545613	3.53115e-11	3.14764e-09
IBTK	0.694331	-0.526304	3.54881e-11	3.14968e-09
AK7	0.312313	-1.67894	3.60647e-11	3.18707e-09
TXNDC6	0.420489	-1.24986	3.69708e-11	3.25311e-09
ZNF587	0.568395	-0.815035	3.84795e-11	3.3714e-09
MLL	0.646481	-0.629319	3.9371e-11	3.43482e-09
C20orf94	0.453915	-1.13951	4.03455e-11	3.50493e-09
RBM12B	0.677678	-0.561328	4.10686e-11	3.54898e-09
AFAP1	0.565207	-0.823148	4.11988e-11	3.54898e-09
S100A2	7.18855	2.8457	4.1453e-11	3.55594e-09
ENTPD4	0.590381	-0.760282	4.30722e-11	3.67944e-09
GXYLT1	0.686492	-0.542686	4.51397e-11	3.84006e-09
VPS54	0.723155	-0.467623	4.53892e-11	3.84533e-09
RPS15	1.72477	0.786407	4.57295e-11	3.85821e-09
ATG2B	0.647555	-0.626924	4.61286e-11	3.86943e-09
MKL2	0.684625	-0.546614	4.63205e-11	3.86943e-09
KIAA1109	0.621223	-0.686818	4.64286e-11	3.86943e-09
SH3BGRL3	1.71002	0.77401	4.7928e-11	3.97822e-09
DHRS4	1.47909	0.564714	4.94469e-11	4.08775e-09
NEU3	0.461294	-1.11624	5.00181e-11	4.09333e-09
KIF27	0.528645	-0.919628	5.00451e-11	4.09333e-09
MGRN1	0.709458	-0.495211	5.01135e-11	4.09333e-09
C15orf63	1.57448	0.654878	5.03915e-11	4.09366e-09
FAM115A	0.479875	-1.05927	5.05168e-11	4.09366e-09
TMEM131	0.699007	-0.516621	5.33313e-11	4.30472e-09
CASD1	0.639147	-0.645781	5.39836e-11	4.34029e-09
LRBA	0.628863	-0.669182	5.46383e-11	4.37576e-09
GPATCH8	0.717115	-0.479723	5.78033e-11	4.56079e-09
MBTD1	0.674338	-0.568457	5.8073e-11	4.56079e-09
LOC200030	0.634223	-0.656939	5.81641e-11	4.56079e-09
PLEKHH1	0.432416	-1.20951	5.83262e-11	4.56079e-09
NDUFA12	1.39282	0.478004	5.83758e-11	4.56079e-09
MAML2	0.410525	-1.28446	5.84652e-11	4.56079e-09
BST2	2.44979	1.29266	5.85058e-11	4.56079e-09
GMCL1	0.551716	-0.858001	5.89087e-11	4.57022e-09
MAP9	0.259672	-1.94524	5.90727e-11	4.57022e-09
TMEM93	1.4955	0.580632	6.10221e-11	4.6955e-09
PIGM	0.668878	-0.580185	6.13552e-11	4.6955e-09
DCAF16	0.657155	-0.605694	6.13791e-11	4.6955e-09
PPIAL4G	1.55325	0.635293	6.30238e-11	4.8034e-09
ZMYND11	0.697028	-0.520711	6.46489e-11	4.90901e-09
PSMB2	1.3475	0.430287	6.73989e-11	5.08814e-09
C17orf76	0.428746	-1.22181	6.77886e-11	5.08814e-09
TMED4	0.660047	-0.59936	6.795e-11	5.08814e-09
FILIP1	0.365419	-1.45238	6.80007e-11	5.08814e-09
SOCS7	0.47758	-1.06619	6.88699e-11	5.13444e-09
TAF1	0.639152	-0.645768	7.0659e-11	5.23024e-09
SORBS1	0.392838	-1.34799	7.06651e-11	5.23024e-09
TRIM2	0.340348	-1.55492	7.12691e-11	5.25597e-09
PRDM10	0.723437	-0.467061	7.20334e-11	5.29329e-09
PHF8	0.612072	-0.708228	7.28264e-11	5.33245e-09
SLC35F5	0.611468	-0.709652	7.44208e-11	5.4298e-09
ROCK1	0.659646	-0.600237	7.61214e-11	5.51946e-09
PLP2	1.93829	0.954788	7.61881e-11	5.51946e-09
ATE1	0.502875	-0.991729	7.6881e-11	5.54606e-09
NKTR	0.603477	-0.728629	7.70962e-11	5.54606e-09
EPB41L5	0.520371	-0.942386	7.74684e-11	5.55335e-09
C14orf45	0.538308	-0.893497	7.77471e-11	5.5539e-09
RBBP6	0.757824	-0.400065	7.82823e-11	5.57272e-09
MIF	1.73247	0.792833	8.06587e-11	5.71909e-09
ANUBL1	0.602575	-0.730787	8.08962e-11	5.71909e-09
NOC4L	1.42318	0.509121	8.21993e-11	5.79123e-09
SOCS6	0.620798	-0.687804	8.37914e-11	5.87801e-09
GPR173	0.3423	-1.54667	8.40044e-11	5.87801e-09
CACNA1C	0.398785	-1.32632	8.47497e-11	5.90999e-09
TSPO	1.69807	0.763894	8.54147e-11	5.93618e-09
IRF7	2.13242	1.09249	8.88432e-11	6.15359e-09
EIF2AK3	0.631682	-0.662729	8.98182e-11	6.20018e-09
ATP7B	0.249315	-2.00396	9.05205e-11	6.22769e-09
FLVCR1	0.571193	-0.807951	9.09309e-11	6.235e-09
HIPK1	0.650162	-0.621128	9.25708e-11	6.32629e-09
SLC25A28	1.59405	0.672694	9.29473e-11	6.33092e-09
KLHL8	0.566183	-0.82066	9.42687e-11	6.39966e-09
ABCC6	0.24266	-2.04299	9.79943e-11	6.63062e-09
KIAA1958	0.511957	-0.965905	1.00542e-10	6.76006e-09
FNBP1L	0.562234	-0.830758	1.00567e-10	6.76006e-09
KIAA1549	0.258626	-1.95106	1.0159e-10	6.79513e-09
LOC646471	0.450857	-1.14926	1.01828e-10	6.79513e-09
DDR2	0.347173	-1.52628	1.02083e-10	6.79513e-09
CENPN	1.42392	0.509864	1.03349e-10	6.85713e-09
AKAP9	0.648765	-0.624232	1.04284e-10	6.88164e-09
ZNF70	0.612783	-0.706553	1.04389e-10	6.88164e-09
ANKRD36BP1	0.328152	-1.60757	1.09461e-10	7.19283e-09
DHRS4L2	1.53004	0.61357	1.09952e-10	7.20201e-09
CCNT1	0.367813	-1.44296	1.15646e-10	7.5509e-09
FAM8A1	0.651154	-0.618928	1.17393e-10	7.64064e-09
ARHGEF11	0.684296	-0.547308	1.18941e-10	7.71689e-09
LONP2	0.681676	-0.552843	1.19543e-10	7.73147e-09
MED10	1.54866	0.631025	1.23911e-10	7.97112e-09
FAM100B	1.63468	0.709011	1.24026e-10	7.97112e-09
KBTBD7	0.416322	-1.26423	1.25388e-10	8.03348e-09
PDS5A	0.741175	-0.432114	1.26809e-10	8.09918e-09
RAD54L2	0.439577	-1.18581	1.27313e-10	8.10609e-09
YLPM1	0.717005	-0.479945	1.29945e-10	8.24807e-09
UBC	1.38719	0.472165	1.3086e-10	8.28054e-09
TRIM47	1.94778	0.961832	1.3366e-10	8.43167e-09
TNFAIP8	1.77761	0.829942	1.34304e-10	8.44632e-09
SGK269	0.610237	-0.712558	1.37174e-10	8.60043e-09
CLTB	2.01753	1.01259	1.37844e-10	8.6161e-09
ALDH6A1	0.51405	-0.960019	1.38788e-10	8.64375e-09
CCDC85B	1.91313	0.935931	1.3913e-10	8.64375e-09
C7orf40	1.66688	0.737152	1.42324e-10	8.81551e-09
YDJC	1.55095	0.633151	1.42915e-10	8.82544e-09
PTPN11	0.702617	-0.509189	1.4393e-10	8.86145e-09
NF1	0.63754	-0.649413	1.54051e-10	9.43356e-09
ASXL2	0.405136	-1.30352	1.54143e-10	9.43356e-09
BTBD8	0.516817	-0.952273	1.5631e-10	9.53772e-09
DAPK3	1.51452	0.598862	1.57705e-10	9.59429e-09
GTF2A1	0.387976	-1.36596	1.60988e-10	9.76502e-09
TAGLN2	1.55981	0.641366	1.63555e-10	9.8367e-09
ITCH	0.728236	-0.457522	1.63567e-10	9.8367e-09
MED1	0.709026	-0.496089	1.63609e-10	9.8367e-09
KIAA1530	0.584343	-0.775114	1.64937e-10	9.88751e-09
MAP3K12	0.519307	-0.94534	1.66878e-10	9.97475e-09
RAPGEF6	0.396687	-1.33393	1.68322e-10	1.00318e-08
KIAA0100	0.697017	-0.520734	1.71618e-10	1.01986e-08
KBTBD4	0.559777	-0.837075	1.74781e-10	1.0331e-08
F12	2.25337	1.17209	1.74854e-10	1.0331e-08
TAS2R5	0.48561	-1.04213	1.85607e-10	1.09143e-08
AKAP12	0.291069	-1.78057	1.85792e-10	1.09143e-08
ANKRD17	0.676131	-0.564626	1.87544e-10	1.09858e-08
LATS1	0.502616	-0.992471	1.89114e-10	1.10462e-08
SNX27	0.731162	-0.451736	1.96608e-10	1.14513e-08
AFF4	0.67878	-0.558985	1.99407e-10	1.15814e-08
LCOR	0.406087	-1.30014	2.0099e-10	1.16404e-08
DYNLL1	1.33453	0.416333	2.06502e-10	1.19133e-08
STAU1	0.77288	-0.371684	2.06864e-10	1.19133e-08
KRBA2	0.502969	-0.991459	2.07942e-10	1.19418e-08
RRP1	1.58478	0.664287	2.08681e-10	1.19508e-08
DTX2	1.71978	0.782221	2.17385e-10	1.24146e-08
NBPF1	0.597989	-0.741809	2.21216e-10	1.25983e-08
TIRAP	0.613153	-0.705681	2.25399e-10	1.28009e-08
ZNF660	0.47803	-1.06483	2.26495e-10	1.28276e-08
NFATC2	0.30045	-1.7348	2.31338e-10	1.30658e-08
TMED2	0.738454	-0.437419	2.33137e-10	1.31312e-08
BPTF	0.67121	-0.575165	2.37804e-10	1.33574e-08
PKD2	0.592696	-0.754635	2.47489e-10	1.38635e-08
NCOA2	0.340041	-1.55622	2.49735e-10	1.39512e-08
LOC90834	0.45588	-1.13327	2.53729e-10	1.41357e-08
AURKAIP1	1.48531	0.570766	2.55499e-10	1.41772e-08
SERINC3	0.697141	-0.520478	2.55857e-10	1.41772e-08
SLC11A2	0.623474	-0.681599	2.61589e-10	1.44297e-08
SLC6A6	0.520975	-0.940714	2.62798e-10	1.44297e-08
TM9SF2	0.604954	-0.725102	2.63675e-10	1.44297e-08
BRMS1	1.45892	0.544898	2.63927e-10	1.44297e-08
PANK1	0.517128	-0.951408	2.63932e-10	1.44297e-08
INO80C	1.63397	0.708384	2.65391e-10	1.44709e-08
TBC1D16	0.430527	-1.21582	2.72613e-10	1.48252e-08
ZNF217	0.600595	-0.735536	2.77521e-10	1.50522e-08
VPS13B	0.663059	-0.592791	2.79304e-10	1.51089e-08
MX1	2.67644	1.42031	2.91408e-10	1.57222e-08
WDFY3	0.641937	-0.639497	2.92901e-10	1.57613e-08
ERN1	0.377128	-1.40688	2.96115e-10	1.58925e-08
FLJ10213	0.469854	-1.08972	2.97942e-10	1.59488e-08
2021-03-08	0.465503	-1.10314	3.0257e-10	1.61544e-08
LSM7	1.67007	0.739906	3.15113e-10	1.67266e-08
IPMK	0.399333	-1.32434	3.17739e-10	1.67266e-08
EML1	0.40768	-1.29449	3.17944e-10	1.67266e-08
LIN37	1.51126	0.595754	3.17982e-10	1.67266e-08
SERINC5	0.312913	-1.67617	3.18182e-10	1.67266e-08
SYNJ2BP	0.7484	-0.418119	3.18486e-10	1.67266e-08
IFT140	0.615408	-0.700386	3.18997e-10	1.67266e-08
DDHD1	0.57676	-0.793957	3.19816e-10	1.67267e-08
ZNF664	0.649058	-0.623581	3.22339e-10	1.68158e-08
HECTD1	0.703764	-0.506837	3.23883e-10	1.68408e-08
TBCEL	0.575055	-0.798229	3.24461e-10	1.68408e-08
CDC14A	0.490817	-1.02674	3.33133e-10	1.72472e-08
SLC4A8	0.323475	-1.62828	3.37256e-10	1.74167e-08
UBXN4	0.716093	-0.48178	3.48651e-10	1.79318e-08
H1FX	1.5514	0.63357	3.48979e-10	1.79318e-08
MGAT5	0.324262	-1.62477	3.51466e-10	1.80144e-08
FITM2	0.588209	-0.765598	3.52817e-10	1.80385e-08
ZBTB26	0.568887	-0.813786	3.61227e-10	1.84226e-08
ENTPD5	0.593729	-0.752125	3.65992e-10	1.86193e-08
C17orf63	0.726985	-0.460002	3.74676e-10	1.90139e-08
MDN1	0.49304	-1.02022	3.80926e-10	1.92833e-08
RPP21	1.52344	0.607335	3.90797e-10	1.97343e-08
PIN1	1.44169	0.527763	3.93881e-10	1.98411e-08
IKBKG	1.4588	0.544785	4.03716e-10	2.02867e-08
SEC14L1	0.626626	-0.674325	4.11161e-10	2.06103e-08
UBN2	0.681561	-0.553085	4.13437e-10	2.06739e-08
U2AF1	1.34862	0.431488	4.1445e-10	2.06741e-08
ABCD3	0.662659	-0.593661	4.28573e-10	2.13267e-08
TMED10	0.758222	-0.399307	4.31849e-10	2.1392e-08
ZNF81	0.576472	-0.794678	4.3213e-10	2.1392e-08
PNN	0.760853	-0.394311	4.33016e-10	2.1392e-08
ITSN1	0.609291	-0.714798	4.36919e-10	2.1533e-08
KRT5	12.0183	3.58716	4.41488e-10	2.1706e-08
ATM	0.615194	-0.700887	4.49921e-10	2.20676e-08
DRAP1	1.48747	0.572862	4.6103e-10	2.25585e-08
MED23	0.693125	-0.528812	4.62165e-10	2.25603e-08
RBM42	1.48993	0.575244	4.63686e-10	2.25808e-08
PCDHAC2	0.201834	-2.30876	4.68591e-10	2.27438e-08
USP12	0.477705	-1.06581	4.69253e-10	2.27438e-08
SLIT2	0.217013	-2.20414	4.7702e-10	2.30657e-08
KLHDC10	0.57292	-0.803594	5.01946e-10	2.42139e-08
PHLDA3	1.98981	0.992634	5.08142e-10	2.44552e-08
ZNF281	0.410544	-1.28439	5.13573e-10	2.46587e-08
TXLNG	0.535469	-0.901124	5.16697e-10	2.47508e-08
ZNF432	0.519614	-0.944489	5.20266e-10	2.48073e-08
KIAA1244	0.281458	-1.82901	5.20297e-10	2.48073e-08
CEP290	0.566269	-0.820441	5.21563e-10	2.481e-08
IPP	0.639316	-0.645399	5.26441e-10	2.4984e-08
HEATR5B	0.675394	-0.5662	5.3918e-10	2.55295e-08
ZFYVE16	0.723686	-0.466563	5.5289e-10	2.61183e-08
TSPYL4	0.604924	-0.725173	5.57582e-10	2.61895e-08
ZNF791	0.589909	-0.761436	5.58091e-10	2.61895e-08
ADD1	0.759789	-0.396329	5.59182e-10	2.61895e-08
PDE8B	0.344322	-1.53817	5.59506e-10	2.61895e-08
PGLS	1.49939	0.584373	5.62306e-10	2.62606e-08
MAN1A2	0.584176	-0.775525	5.652e-10	2.63253e-08
KIAA1919	0.642371	-0.63852	5.66259e-10	2.63253e-08
UBXN2B	0.666417	-0.585503	5.7123e-10	2.64963e-08
BAGE2	0.5585	-0.840371	5.76549e-10	2.66826e-08
FANCG	1.36642	0.450403	5.84072e-10	2.69699e-08
CYB5RL	0.545197	-0.87515	5.86722e-10	2.70314e-08
USP51	0.3996	-1.32337	5.99888e-10	2.7576e-08
FGFR1	0.340066	-1.55612	6.12173e-10	2.80778e-08
ZDHHC20	0.341096	-1.55175	6.2566e-10	2.86323e-08
MOAP1	0.640731	-0.64221	6.35484e-10	2.89644e-08
JMJD1C	0.641386	-0.640734	6.35743e-10	2.89644e-08
ADNP	0.678375	-0.559846	6.40735e-10	2.9068e-08
TTPA	0.407733	-1.2943	6.40851e-10	2.9068e-08
DNAJC3	0.696506	-0.521793	6.46103e-10	2.92415e-08
TMEM39B	1.35266	0.435795	6.57813e-10	2.97059e-08
UPP1	2.32022	1.21426	6.6413e-10	2.99253e-08
KIAA1267	0.725308	-0.463335	6.69401e-10	3.00966e-08
TMEM222	1.33456	0.41636	7.03994e-10	3.15827e-08
KIDINS220	0.654523	-0.611485	7.27817e-10	3.25301e-08
NLK	0.738199	-0.437918	7.28287e-10	3.25301e-08
NCOR1	0.66341	-0.592026	7.499e-10	3.34227e-08
TSGA10	0.509059	-0.974096	7.53399e-10	3.34518e-08
UBE4A	0.713398	-0.48722	7.54653e-10	3.34518e-08
ADAT1	0.55427	-0.85134	7.55448e-10	3.34518e-08
LRRC43	0.383854	-1.38137	7.58339e-10	3.35075e-08
KIAA0494	0.74063	-0.433176	7.6193e-10	3.35937e-08
FRY	0.417031	-1.26177	7.6628e-10	3.3713e-08
MAGI1	0.471227	-1.08551	7.7027e-10	3.3816e-08
PRKAR2A	0.420272	-1.2506	7.73298e-10	3.38764e-08
ATXN7L3B	0.666186	-0.586002	7.8106e-10	3.41435e-08
ALKBH6	1.58384	0.663426	7.98109e-10	3.48145e-08
ABCC9	0.385893	-1.37373	8.02044e-10	3.49053e-08
SETD5	0.709615	-0.494892	8.03595e-10	3.49053e-08
STOML2	1.41824	0.5041	8.20443e-10	3.55618e-08
POGZ	0.721783	-0.470362	8.6788e-10	3.75385e-08
ZC3H12B	0.524982	-0.92966	8.73566e-10	3.7705e-08
C17orf28	0.278279	-1.8454	8.86114e-10	3.81662e-08
TSSK4	0.511247	-0.967909	9.10258e-10	3.91239e-08
SETD2	0.721589	-0.470751	9.15189e-10	3.92536e-08
OASL	3.02525	1.59706	9.25047e-10	3.95935e-08
SEC24A	0.658762	-0.602171	9.38032e-10	4.00657e-08
HEATR5A	0.623262	-0.68209	9.4555e-10	4.03029e-08
PRRC1	0.736725	-0.440802	9.59565e-10	4.08153e-08
CDT1	1.59857	0.676786	9.65313e-10	4.09748e-08
IREB2	0.710921	-0.492239	9.74326e-10	4.1263e-08
IMP3	1.43238	0.518417	9.76126e-10	4.1263e-08
FOXJ3	0.754448	-0.406507	9.86956e-10	4.16349e-08
MASP2	0.483516	-1.04836	9.89045e-10	4.16374e-08
CKS1B	1.55984	0.6414	9.9548e-10	4.18224e-08
LIG4	0.653493	-0.613756	1.00745e-09	4.22386e-08
RPL24	1.60206	0.679926	1.01493e-09	4.24657e-08
BCOR	0.647043	-0.628066	1.02352e-09	4.26367e-08
PKMYT1	1.62165	0.697465	1.02463e-09	4.26367e-08
RPL36	1.70777	0.772114	1.02526e-09	4.26367e-08
SMG1	0.703425	-0.507531	1.0456e-09	4.33944e-08
ATP11A	0.526675	-0.925014	1.0618e-09	4.39735e-08
PITX1	2.95154	1.56147	1.06384e-09	4.39735e-08
ZMYM4	0.746842	-0.421125	1.08727e-09	4.48517e-08
AK2	1.3357	0.4176	1.09088e-09	4.49101e-08
PSMB10	1.9418	0.957391	1.10664e-09	4.54675e-08
MTR	0.699895	-0.51479	1.1152e-09	4.57275e-08
TTC30B	0.626193	-0.675321	1.12504e-09	4.60391e-08
IL15RA	1.98074	0.986043	1.13161e-09	4.62157e-08
LIG3	0.711566	-0.49093	1.13622e-09	4.62855e-08
COX5B	1.55924	0.640843	1.13784e-09	4.62855e-08
FLT3LG	1.88142	0.911818	1.15936e-09	4.70677e-08
C16orf61	1.36071	0.444362	1.18856e-09	4.81578e-08
EIF5A	1.49531	0.58044	1.23865e-09	5.00885e-08
ABCC6P1	0.334438	-1.58019	1.24186e-09	5.01191e-08
GNG5	1.33671	0.418691	1.24984e-09	5.03422e-08
ARHGEF12	0.652703	-0.6155	1.25371e-09	5.03993e-08
CCDC30	0.522684	-0.93599	1.2605e-09	5.05729e-08
NDUFS6	1.62685	0.70208	1.26885e-09	5.08085e-08
KEAP1	1.41742	0.503265	1.27672e-09	5.10239e-08
UBA52	1.50427	0.589067	1.31881e-09	5.26036e-08
SLC16A4	0.299333	-1.74018	1.32345e-09	5.26551e-08
C17orf72	0.363283	-1.46083	1.32707e-09	5.26551e-08
SEL1L	0.719016	-0.475904	1.32781e-09	5.26551e-08
ZNF236	0.654539	-0.611449	1.34539e-09	5.32493e-08
TNRC6B	0.678707	-0.559138	1.37493e-09	5.43136e-08
SACM1L	0.743192	-0.428192	1.38406e-09	5.45691e-08
C3orf37	1.4544	0.540427	1.4302e-09	5.62802e-08
ADCY6	0.592668	-0.754704	1.44719e-09	5.68395e-08
BMS1P4	0.595973	-0.74668	1.46321e-09	5.73589e-08
SLC39A9	0.806025	-0.311103	1.48832e-09	5.82318e-08
SPTLC2	0.641414	-0.640672	1.5026e-09	5.85891e-08
BRWD3	0.529945	-0.916085	1.50316e-09	5.85891e-08
HOMER3	1.84855	0.886397	1.51728e-09	5.90272e-08
FNDC3A	0.603215	-0.729256	1.55373e-09	6.02698e-08
C1orf212	1.30137	0.380029	1.5551e-09	6.02698e-08
RNF4	0.757312	-0.40104	1.56384e-09	6.04308e-08
DISC1	0.487587	-1.03627	1.56515e-09	6.04308e-08
ZBED3	0.423405	-1.23989	1.61646e-09	6.22944e-08
MRPS18C	1.35208	0.435176	1.62476e-09	6.24968e-08
FAM26F	2.6664	1.41489	1.63567e-09	6.27987e-08
PHLPP2	0.598973	-0.739436	1.65487e-09	6.34171e-08
POLR1D	1.39567	0.48096	1.67741e-09	6.41608e-08
TUSC1	1.88415	0.913916	1.71761e-09	6.55764e-08
KIRREL	0.268791	-1.89545	1.73985e-09	6.6302e-08
SPHK1	2.04401	1.0314	1.76424e-09	6.70595e-08
EMX2OS	0.222388	-2.16885	1.76843e-09	6.70595e-08
B3GAT2	0.552643	-0.85558	1.76954e-09	6.70595e-08
PHF20	0.731519	-0.451034	1.77621e-09	6.71879e-08
MAN2A2	0.654582	-0.611355	1.79154e-09	6.76017e-08
ATP5D	1.66187	0.732804	1.79374e-09	6.76017e-08
S100A11	1.78017	0.832019	1.80567e-09	6.78158e-08
DEF6	1.63005	0.704913	1.80936e-09	6.78158e-08
ATRN	0.655832	-0.608602	1.81026e-09	6.78158e-08
ACBD5	0.68367	-0.548628	1.81265e-09	6.78158e-08
TCP11L2	0.538734	-0.892354	1.81932e-09	6.78906e-08
COL25A1	0.336998	-1.56919	1.82128e-09	6.78906e-08
NXT1	1.44904	0.535097	1.84583e-09	6.86079e-08
EXOSC5	1.59326	0.671978	1.84721e-09	6.86079e-08
DDHD2	0.678439	-0.559709	1.86282e-09	6.90625e-08
CLASP2	0.701582	-0.511316	1.88136e-09	6.96239e-08
ZNF284	0.409187	-1.28917	1.90631e-09	7.04202e-08
LANCL1	0.653585	-0.613552	1.94212e-09	7.15734e-08
USP49	0.476582	-1.0692	1.94451e-09	7.15734e-08
ZNF24	0.779459	-0.359456	1.97108e-09	7.24213e-08
SNPH	0.405007	-1.30398	1.99704e-09	7.32438e-08
MED30	1.42881	0.514809	2.02015e-09	7.39592e-08
HS2ST1	0.717749	-0.478449	2.02749e-09	7.40955e-08
TMEM106B	0.684464	-0.546953	2.03278e-09	7.41568e-08
TMEM63A	0.552422	-0.856159	2.08703e-09	7.60007e-08
RAP2B	1.89421	0.921593	2.10441e-09	7.6433e-08
ISG15	2.6764	1.4203	2.10636e-09	7.6433e-08
C17orf57	0.498671	-1.00384	2.13598e-09	7.73708e-08
TAF4	0.697876	-0.518958	2.18347e-09	7.89515e-08
SCNM1	1.42457	0.510525	2.20717e-09	7.9668e-08
SNED1	0.450386	-1.15077	2.24695e-09	8.09613e-08
CACNA2D2	0.411324	-1.28165	2.25518e-09	8.11151e-08
CHD6	0.581873	-0.781224	2.28979e-09	8.22158e-08
CCDC40	0.295209	-1.76019	2.29469e-09	8.22478e-08
ALMS1	0.70011	-0.514346	2.30686e-09	8.25398e-08
PLEKHA5	0.592913	-0.754107	2.31523e-09	8.26947e-08
CAMTA1	1.40558	0.491169	2.32352e-09	8.27239e-08
SUMO3	1.32275	0.403541	2.32523e-09	8.27239e-08
ELMO2	0.701118	-0.51227	2.32815e-09	8.27239e-08
KRT16	9.65041	3.27059	2.37543e-09	8.42581e-08
CCNT2	0.684571	-0.546728	2.38121e-09	8.43171e-08
ALS2	0.714805	-0.484379	2.42197e-09	8.56126e-08
C10orf32	0.715621	-0.482732	2.47212e-09	8.71093e-08
TGFBR2	0.519135	-0.945817	2.47281e-09	8.71093e-08
EDF1	1.51932	0.603425	2.52254e-09	8.87087e-08
UPF0639	0.342936	-1.54399	2.54111e-09	8.92086e-08
CSPP1	0.699123	-0.516381	2.58318e-09	9.05304e-08
AIM2	5.7199	2.51599	2.64838e-09	9.26572e-08
UTP14C	0.686114	-0.54348	2.66603e-09	9.31158e-08
CCDC109B	1.83447	0.87536	2.67545e-09	9.32859e-08
PARG	0.749021	-0.416921	2.69111e-09	9.36726e-08
NMI	1.5731	0.653615	2.74849e-09	9.55078e-08
SGK196	0.457833	-1.12711	2.78923e-09	9.67595e-08
LMTK2	0.446375	-1.16367	2.82e-09	9.76617e-08
TOMM5	1.43128	0.517306	2.85823e-09	9.87503e-08
SIK2	0.638593	-0.647031	2.86107e-09	9.87503e-08
PODXL	0.488101	-1.03475	2.8772e-09	9.91401e-08
C19orf24	1.60501	0.682579	2.9605e-09	1.01839e-07
SLC4A4	0.189937	-2.39641	2.97737e-09	1.02248e-07
DPM2	1.43122	0.517241	2.99561e-09	1.02575e-07
OSTF1	1.46331	0.549237	2.9969e-09	1.02575e-07
MRPL52	1.45667	0.54267	3.01957e-09	1.03179e-07
GLYR1	0.777805	-0.36252	3.04114e-09	1.03585e-07
RSBN1	0.723501	-0.466933	3.04157e-09	1.03585e-07
PTCH2	0.431501	-1.21256	3.07192e-09	1.04445e-07
PSMA4	1.39622	0.481522	3.09988e-09	1.05221e-07
HMCN1	0.330162	-1.59875	3.10739e-09	1.05302e-07
PI4KA	0.706638	-0.500957	3.11522e-09	1.05393e-07
SOCS5	0.713793	-0.486422	3.12485e-09	1.0546e-07
NHLRC2	0.543466	-0.879738	3.12749e-09	1.0546e-07
PANK3	0.648019	-0.625891	3.15517e-09	1.06101e-07
ZNF254	0.351094	-1.51007	3.15685e-09	1.06101e-07
ASH1L	0.656507	-0.607119	3.17885e-09	1.06666e-07
KLHDC8A	0.286453	-1.80363	3.19275e-09	1.06893e-07
THSD7A	0.384847	-1.37764	3.19604e-09	1.06893e-07
C12orf54	4.5827	2.1962	3.25297e-09	1.08619e-07
ZNF720	0.707438	-0.499324	3.25862e-09	1.08631e-07
DHX33	0.493238	-1.01964	3.28239e-09	1.09246e-07
HIP1	0.464161	-1.1073	3.33351e-09	1.10768e-07
NEK4	0.648718	-0.624337	3.35642e-09	1.11348e-07
GOLGA4	0.651982	-0.617097	3.36395e-09	1.11418e-07
PDP2	0.58975	-0.761825	3.37396e-09	1.11444e-07
UTP20	0.639889	-0.644107	3.37562e-09	1.11444e-07
RIF1	0.591502	-0.757546	3.41357e-09	1.12516e-07
MRPL54	1.58486	0.664357	3.4212e-09	1.12587e-07
KIAA0317	0.732249	-0.449594	3.48941e-09	1.14647e-07
PHLDA2	2.01272	1.00914	3.51242e-09	1.15219e-07
SBF2	0.656776	-0.606526	3.53175e-09	1.15668e-07
FBXO21	0.723664	-0.466609	3.53964e-09	1.15741e-07
ZNF689	0.514556	-0.958599	3.55108e-09	1.1593e-07
RUNX1T1	0.437261	-1.19343	3.62255e-09	1.18075e-07
WSB1	0.698031	-0.518637	3.66316e-09	1.1921e-07
BBS1	0.66263	-0.593725	3.7078e-09	1.20471e-07
HIPK2	0.528123	-0.921054	3.7398e-09	1.21319e-07
TTC17	0.657565	-0.604796	3.75216e-09	1.21527e-07
TUBB6	2.22866	1.15618	3.76984e-09	1.2189e-07
RPL35A	1.61626	0.692656	3.77812e-09	1.2189e-07
PDPR	0.533136	-0.907424	3.78119e-09	1.2189e-07
TTC21B	0.677221	-0.562302	3.80263e-09	1.22289e-07
ALKBH2	1.45127	0.537317	3.80549e-09	1.22289e-07
CSDA	1.59691	0.675283	3.82887e-09	1.22847e-07
TK1	1.62319	0.698835	3.92949e-09	1.25879e-07
UCN2	3.22511	1.68935	3.97353e-09	1.27091e-07
TTC37	0.589345	-0.762815	4.07391e-09	1.30099e-07
RNH1	1.3629	0.446675	4.0996e-09	1.30715e-07
ARL1	0.757639	-0.400418	4.13125e-09	1.3152e-07
MAP4K3	0.708082	-0.498011	4.15046e-09	1.31927e-07
LOC400759	3.20536	1.68049	4.16943e-09	1.32325e-07
FAM108A1	1.40943	0.49511	4.22201e-09	1.33786e-07
CACNA1D	0.257803	-1.95566	4.24647e-09	1.34354e-07
BTAF1	0.635339	-0.654402	4.26058e-09	1.34592e-07
CELF1	0.699712	-0.515167	4.28096e-09	1.35028e-07
NAPA	1.38082	0.465528	4.29043e-09	1.35119e-07
USO1	0.730275	-0.453488	4.36655e-09	1.37305e-07
SULT1C4	0.346856	-1.52759	4.38394e-09	1.37641e-07
UBFD1	0.712741	-0.48855	4.42238e-09	1.38636e-07
MIB1	0.682191	-0.551752	4.43703e-09	1.38882e-07
SF3B14	1.33203	0.413628	4.47384e-09	1.39821e-07
SPATA6	0.321648	-1.63645	4.54161e-09	1.41723e-07
RSPRY1	0.528808	-0.919184	4.57193e-09	1.42452e-07
SUZ12	0.762231	-0.3917	4.63693e-09	1.43976e-07
IL20RB	6.24498	2.6427	4.64158e-09	1.43976e-07
PHF19	1.48145	0.56701	4.64189e-09	1.43976e-07
VHL	0.61737	-0.695793	4.76853e-09	1.4768e-07
POLR1E	1.44591	0.531975	4.81546e-09	1.48788e-07
PSMB9	2.38475	1.25384	4.81881e-09	1.48788e-07
LOC284441	0.465743	-1.10239	4.83372e-09	1.49024e-07
CENPW	1.99206	0.994258	4.88294e-09	1.50315e-07
POP5	1.38754	0.472529	4.90285e-09	1.50702e-07
CLTC	0.75153	-0.412097	4.93148e-09	1.51278e-07
TMF1	0.662962	-0.593002	4.93635e-09	1.51278e-07
CCM2	1.47807	0.563712	4.94415e-09	1.51291e-07
LOC284232	0.578975	-0.788427	4.95223e-09	1.51312e-07
ZC3HAV1L	0.467199	-1.09789	4.97591e-09	1.5181e-07
MRPS15	1.43499	0.521045	5.0481e-09	1.53783e-07
LOC100271836	0.549368	-0.864156	5.09567e-09	1.54779e-07
SATB2	0.48033	-1.0579	5.10184e-09	1.54779e-07
LOC220429	0.624697	-0.678772	5.10381e-09	1.54779e-07
TMEM47	0.363648	-1.45938	5.111e-09	1.54779e-07
CYP46A1	0.494054	-1.01726	5.1457e-09	1.55601e-07
C8orf37	0.610387	-0.712203	5.15862e-09	1.55761e-07
PDPK1	0.648611	-0.624573	5.21837e-09	1.57334e-07
VAMP8	1.49671	0.581796	5.23239e-09	1.57402e-07
PIM1	1.78897	0.839131	5.236e-09	1.57402e-07
ALG3	1.47033	0.556141	5.26474e-09	1.58035e-07
NFXL1	0.679777	-0.556867	5.29406e-09	1.58605e-07
CLCN3	0.595956	-0.746722	5.30593e-09	1.58605e-07
PPP4R2	0.510584	-0.969781	5.30696e-09	1.58605e-07
KIAA1211	0.326874	-1.61319	5.34409e-09	1.59483e-07
IFI27L2	2.00489	1.00353	5.43615e-09	1.61785e-07
NSUN5	1.45367	0.539701	5.43701e-09	1.61785e-07
S1PR5	3.78207	1.91918	5.46147e-09	1.62277e-07
C9orf3	2.04993	1.03558	5.49529e-09	1.62877e-07
ARID2	0.722535	-0.468861	5.50485e-09	1.62877e-07
SLC17A5	0.635198	-0.654722	5.50625e-09	1.62877e-07
SLC35E2	0.65714	-0.605728	5.51344e-09	1.62877e-07
ADPRHL2	1.30398	0.382924	5.57043e-09	1.64324e-07
LY6K	2.96126	1.56621	5.59556e-09	1.64828e-07
ZNF585B	0.435173	-1.20034	5.60537e-09	1.6488e-07
NUFIP2	0.777123	-0.363786	5.6364e-09	1.65555e-07
BMS1P5	0.607161	-0.719849	5.67527e-09	1.66458e-07
CCAR1	0.764358	-0.38768	5.79136e-09	1.69386e-07
FAM168A	0.516153	-0.95413	5.79161e-09	1.69386e-07
MCM5	1.4777	0.56335	5.81997e-09	1.69973e-07
LMAN1	0.704615	-0.505093	5.87795e-09	1.71422e-07
ERLEC1	0.697402	-0.519937	5.88807e-09	1.71473e-07
AURKB	1.53802	0.621076	6.00999e-09	1.74776e-07
ENDOG	1.63868	0.71253	6.09006e-09	1.76853e-07
CCDC94	1.43601	0.522063	6.18117e-09	1.79223e-07
C11orf61	0.65636	-0.607441	6.18913e-09	1.79223e-07
IL6ST	0.311226	-1.68397	6.22974e-09	1.80144e-07
PCDHGA2	0.476319	-1.07	6.25577e-09	1.80642e-07
UNC5C	0.433215	-1.20684	6.33426e-09	1.82651e-07
EXOC6	0.655876	-0.608504	6.44535e-09	1.85593e-07
ARHGEF38	0.322739	-1.63156	6.53128e-09	1.87804e-07
PEG3	0.38394	-1.38105	6.57163e-09	1.887e-07
MRPL14	1.50284	0.58769	6.59704e-09	1.89164e-07
ADAMTS9	0.416787	-1.26262	6.60955e-09	1.89258e-07
SQRDL	1.7795	0.831474	6.63094e-09	1.89498e-07
ARHGEF7	0.758184	-0.39938	6.63641e-09	1.89498e-07
POFUT1	0.719679	-0.474575	6.86459e-09	1.95506e-07
KDM3B	0.73298	-0.448153	6.86589e-09	1.95506e-07
ZFP14	0.607926	-0.718033	6.9136e-09	1.96592e-07
SORBS2	0.248296	-2.00987	6.94268e-09	1.97126e-07
ATP9A	0.549765	-0.863113	6.95161e-09	1.97126e-07
TRIM44	0.579566	-0.786956	6.97809e-09	1.97603e-07
SF3B1	0.777813	-0.362505	7.0623e-09	1.99712e-07
SEC24D	0.55353	-0.853267	7.19119e-09	2.03077e-07
EPS8	0.439808	-1.18505	7.22272e-09	2.03687e-07
MTAP	1.5255	0.609278	7.3831e-09	2.07924e-07
IFI27	2.53734	1.34332	7.40407e-09	2.08228e-07
POLE4	1.48171	0.567264	7.47395e-09	2.09906e-07
EIF4EBP1	1.65042	0.722833	7.50771e-09	2.10565e-07
C1orf122	1.44218	0.528254	7.58067e-09	2.12321e-07
KL	0.391025	-1.35467	7.59609e-09	2.12463e-07
JUNB	1.81643	0.861104	7.61258e-09	2.12634e-07
CGN	0.414542	-1.27041	7.75316e-09	2.16266e-07
ALDH1A1	0.208834	-2.25957	7.76463e-09	2.16291e-07
MRPL47	1.5007	0.585635	7.85261e-09	2.18158e-07
SF3A2	1.42197	0.507889	7.85293e-09	2.18158e-07
ZNF471	0.333978	-1.58218	7.86605e-09	2.18227e-07
NFKBIB	1.44892	0.534974	7.96924e-09	2.20626e-07
NDUFB7	1.55012	0.632377	7.98355e-09	2.20626e-07
B4GALT5	0.607395	-0.719294	7.98481e-09	2.20626e-07
BUD31	1.42263	0.508557	8.03759e-09	2.21786e-07
ERCC4	0.707375	-0.499452	8.09291e-09	2.23012e-07
MITD1	1.32592	0.406996	8.1453e-09	2.24154e-07
MYST3	0.668514	-0.58097	8.20732e-09	2.25558e-07
IFI16	2.43098	1.28154	8.35567e-09	2.29328e-07
SUMO2	1.38807	0.473078	8.38401e-09	2.29798e-07
COL7A1	2.89976	1.53593	8.43177e-09	2.30799e-07
RNF214	0.735442	-0.443317	8.4668e-09	2.31448e-07
KIAA0556	0.716736	-0.480486	8.52171e-09	2.32639e-07
BLOC1S1	1.48876	0.574109	8.65683e-09	2.36014e-07
PAFAH1B2	0.531045	-0.913094	8.81662e-09	2.40051e-07
FBXL20	0.703681	-0.507006	8.95131e-09	2.43395e-07
LOC653653	0.468521	-1.09381	9.07696e-09	2.46484e-07
TTC25	0.344383	-1.53791	9.12243e-09	2.47392e-07
KLF16	1.43752	0.523583	9.14293e-09	2.4762e-07
LOC650623	0.390354	-1.35714	9.16729e-09	2.47952e-07
ZNF354C	0.380871	-1.39263	9.31399e-09	2.51588e-07
MOBKL1A	0.712976	-0.488074	9.46179e-09	2.55244e-07
OTUD3	0.650567	-0.62023	9.56471e-09	2.57681e-07
NFAT5	0.693376	-0.52829	9.59864e-09	2.58256e-07
PFDN2	1.49649	0.58158	9.63112e-09	2.5869e-07
SEC61A2	0.672218	-0.572999	9.64e-09	2.5869e-07
NSF	0.729432	-0.455154	9.72149e-09	2.60536e-07
GJB3	3.00182	1.58584	9.74404e-09	2.60799e-07
SNRPF	1.43794	0.524005	9.95407e-09	2.66074e-07
PLEKHG1	0.473335	-1.07907	1.00103e-08	2.67229e-07
MAP7D1	1.50214	0.587017	1.00988e-08	2.69241e-07
CCDC39	0.460415	-1.11899	1.03257e-08	2.74906e-07
RBM12	0.826587	-0.274761	1.03381e-08	2.74906e-07
CNST	0.721664	-0.4706	1.04032e-08	2.76277e-07
AKAP11	0.676388	-0.564076	1.0501e-08	2.78514e-07
HES4	2.0591	1.04202	1.06599e-08	2.82364e-07
S100A16	2.10323	1.07261	1.07249e-08	2.8372e-07
TPRA1	1.38095	0.465662	1.07439e-08	2.83856e-07
ZHX3	0.672493	-0.572409	1.07582e-08	2.83866e-07
RPP30	1.28947	0.366781	1.0801e-08	2.8463e-07
TGOLN2	0.687115	-0.541377	1.0822e-08	2.84817e-07
DNAJC27	0.727136	-0.459703	1.08815e-08	2.86016e-07
RPL37	1.6671	0.737338	1.08994e-08	2.86119e-07
OSBP	0.785268	-0.348743	1.10676e-08	2.90164e-07
PSMA2	1.32082	0.401434	1.11345e-08	2.91546e-07
GNLY	3.49143	1.80382	1.11795e-08	2.9235e-07
TMEM54	1.75463	0.811171	1.12172e-08	2.92871e-07
ZMYM3	0.634462	-0.656394	1.1228e-08	2.92871e-07
AP2M1	1.43792	0.523988	1.13603e-08	2.95946e-07
THAP3	1.4536	0.539628	1.14109e-08	2.96552e-07
MFSD9	0.679933	-0.556536	1.14125e-08	2.96552e-07
ZNF699	0.450112	-1.15164	1.15213e-08	2.98873e-07
NCRNA00095	0.502091	-0.993979	1.1531e-08	2.98873e-07
RBM16	0.753665	-0.408004	1.1561e-08	2.99272e-07
PEX1	0.697701	-0.519319	1.16337e-08	3.00774e-07
CREBBP	0.742937	-0.428688	1.1923e-08	3.07691e-07
PSMB3	1.4536	0.539629	1.19313e-08	3.07691e-07
C1orf95	0.405305	-1.30292	1.19541e-08	3.07892e-07
LMBR1	0.694909	-0.525104	1.20989e-08	3.11231e-07
WDR53	1.43944	0.525512	1.21731e-08	3.12447e-07
RPGR	0.603869	-0.727693	1.21766e-08	3.12447e-07
KIF13B	0.543331	-0.880097	1.21919e-08	3.12448e-07
NR2C2	0.559208	-0.838544	1.23824e-08	3.16934e-07
SPRY3	0.508379	-0.976024	1.24828e-08	3.19016e-07
C9orf23	1.46898	0.554816	1.24949e-08	3.19016e-07
PRR24	1.60758	0.68489	1.25414e-08	3.19805e-07
FREM2	0.14274	-2.80854	1.27335e-08	3.24301e-07
SYPL2	0.46235	-1.11294	1.27896e-08	3.25324e-07
PPFIA2	0.501753	-0.994951	1.28623e-08	3.26506e-07
LGR4	0.469346	-1.09128	1.28805e-08	3.26506e-07
INSR	0.600965	-0.734648	1.28838e-08	3.26506e-07
TLN2	0.480872	-1.05628	1.31291e-08	3.32212e-07
MRPL28	1.44721	0.533272	1.31414e-08	3.32212e-07
WDR11	0.739334	-0.435703	1.31821e-08	3.32831e-07
C10orf118	0.525772	-0.927492	1.32335e-08	3.33718e-07
ADCY5	0.26956	-1.89132	1.33087e-08	3.35204e-07
ETV7	2.33463	1.2232	1.33273e-08	3.35259e-07
PLEK2	2.08019	1.05671	1.36848e-08	3.43831e-07
C4orf42	0.718624	-0.476691	1.39432e-08	3.49893e-07
SARNP	1.36042	0.444049	1.39984e-08	3.50851e-07
SBNO1	0.431693	-1.21192	1.40655e-08	3.52102e-07
AHCYL2	0.578722	-0.789056	1.416e-08	3.54034e-07
FERMT2	0.408914	-1.29013	1.42054e-08	3.54738e-07
SALL1	0.273234	-1.87179	1.4271e-08	3.55942e-07
DRD2	0.322021	-1.63477	1.42888e-08	3.55953e-07
FBL	1.56937	0.650189	1.43078e-08	3.55994e-07
FGF18	0.324546	-1.62351	1.43829e-08	3.57429e-07
RBM25	0.753106	-0.409075	1.45593e-08	3.61373e-07
C20orf177	0.529993	-0.915954	1.48641e-08	3.68492e-07
KCTD20	0.62178	-0.685524	1.51175e-08	3.73986e-07
GUK1	1.44256	0.528631	1.51221e-08	3.73986e-07
PEX26	0.647771	-0.626444	1.52793e-08	3.77418e-07
DPP8	0.570417	-0.809912	1.53264e-08	3.78124e-07
DCAF15	1.34785	0.430662	1.55035e-08	3.82035e-07
C1orf26	0.718746	-0.476447	1.56002e-08	3.83956e-07
C4orf29	0.654283	-0.612013	1.57265e-08	3.86601e-07
ACYP2	1.49649	0.581578	1.59808e-08	3.92382e-07
ZMYND19	1.397	0.48233	1.60059e-08	3.92527e-07
TMTC4	0.618024	-0.694266	1.63159e-08	3.99651e-07
GFPT1	0.627628	-0.672018	1.63444e-08	3.99871e-07
AVPR1A	0.426656	-1.22885	1.65099e-08	4.03439e-07
ZNF573	0.550336	-0.861616	1.66475e-08	4.06319e-07
CKS2	1.45381	0.539841	1.67733e-08	4.08901e-07
TCEB1	1.37616	0.460646	1.68304e-08	4.09806e-07
TGFBRAP1	0.459334	-1.12238	1.69554e-08	4.11986e-07
ITGA8	0.327803	-1.6091	1.69819e-08	4.11986e-07
BMP8B	0.481418	-1.05464	1.69968e-08	4.11986e-07
WDR74	1.4359	0.521951	1.70003e-08	4.11986e-07
PPIP5K2	0.725778	-0.462401	1.71604e-08	4.15348e-07
SLC15A3	1.90289	0.928188	1.71819e-08	4.15348e-07
RICH2	0.349787	-1.51545	1.71998e-08	4.15348e-07
KLHL14	0.197199	-2.34227	1.72996e-08	4.16971e-07
WRN	0.656863	-0.606337	1.73088e-08	4.16971e-07
LTC4S	2.09589	1.06756	1.7328e-08	4.16971e-07
IER5L	1.82136	0.865014	1.77838e-08	4.27431e-07
EBP	1.66653	0.736847	1.78044e-08	4.27431e-07
RERE	0.674681	-0.567722	1.7829e-08	4.27521e-07
C1orf35	1.40703	0.492655	1.78719e-08	4.28048e-07
RFC2	1.36256	0.446319	1.79977e-08	4.30558e-07
SUV39H1	1.40139	0.486862	1.80516e-08	4.31103e-07
BCL2L12	1.38456	0.469426	1.80625e-08	4.31103e-07
LOC152217	1.50325	0.588084	1.81562e-08	4.32835e-07
TXNDC17	1.68409	0.751968	1.8201e-08	4.33079e-07
FICD	0.550845	-0.860281	1.82087e-08	4.33079e-07
HUS1B	1.82605	0.86873	1.8263e-08	4.33867e-07
MYST2	0.766649	-0.383361	1.83402e-08	4.35198e-07
MLEC	0.677901	-0.560853	1.83635e-08	4.35247e-07
SNRPB	1.39723	0.482571	1.84648e-08	4.36823e-07
LSM4	1.37344	0.457789	1.84726e-08	4.36823e-07
ACE	0.474008	-1.07702	1.87944e-08	4.4392e-07
PCDHGB7	0.366434	-1.44837	1.90615e-08	4.4971e-07
ZNF234	0.516462	-0.953266	1.91966e-08	4.52377e-07
MAPK8	0.544779	-0.876257	1.92615e-08	4.53387e-07
SRGAP1	0.559156	-0.838678	1.93761e-08	4.55223e-07
PSMB6	1.40184	0.487325	1.93839e-08	4.55223e-07
LYSMD4	1.50916	0.593745	1.94458e-08	4.56004e-07
VPS37D	0.356685	-1.48728	1.94617e-08	4.56004e-07
FAM63B	0.537286	-0.896238	1.96628e-08	4.6019e-07
NME2	1.48596	0.571395	1.97362e-08	4.61382e-07
CAV2	2.25796	1.17502	2.00262e-08	4.67628e-07
KIAA0776	0.708071	-0.498034	2.01014e-08	4.6833e-07
FAM13A	0.50853	-0.975594	2.01019e-08	4.6833e-07
KCTD7	0.652836	-0.615208	2.02075e-08	4.70255e-07
PLAGL2	0.676962	-0.562854	2.05319e-08	4.77262e-07
PBRM1	0.696323	-0.522171	2.05765e-08	4.77758e-07
ISG20	1.96439	0.97408	2.06696e-08	4.79376e-07
ZKSCAN2	0.688212	-0.539076	2.08578e-08	4.83194e-07
AP2S1	1.46381	0.549726	2.10829e-08	4.8763e-07
EPC1	0.565465	-0.822491	2.10969e-08	4.8763e-07
DDA1	1.27206	0.347168	2.11535e-08	4.88388e-07
STRN	0.484379	-1.04579	2.1397e-08	4.93454e-07
ZNF524	1.4926	0.57783	2.14374e-08	4.93831e-07
LOC100286844	0.624157	-0.68002	2.14956e-08	4.94617e-07
CABIN1	0.746159	-0.422445	2.15628e-08	4.95607e-07
TNPO1	0.779047	-0.360217	2.17913e-08	5.00296e-07
GPR116	0.53295	-0.907929	2.19256e-08	5.02817e-07
ZNF616	0.667565	-0.583019	2.22397e-08	5.0945e-07
RABGGTA	1.42766	0.513648	2.23295e-08	5.10938e-07
ANKRD52	0.705127	-0.504045	2.24152e-08	5.11954e-07
NDUFB4	1.36713	0.451154	2.24239e-08	5.11954e-07
GPLD1	0.457333	-1.12868	2.24909e-08	5.12912e-07
TSPAN12	0.354087	-1.49782	2.27705e-08	5.18292e-07
CAPG	1.61237	0.689184	2.27773e-08	5.18292e-07
TMEM231	0.441952	-1.17804	2.28385e-08	5.19107e-07
PCDHB11	0.369243	-1.43736	2.31225e-08	5.24982e-07
EARS2	0.758186	-0.399377	2.34009e-08	5.30714e-07
PDK4	0.314812	-1.66744	2.34646e-08	5.31571e-07
PPM1J	1.9743	0.981339	2.42144e-08	5.47502e-07
ZNF721	0.697313	-0.520121	2.42213e-08	5.47502e-07
FAM128B	1.53362	0.616941	2.4528e-08	5.53824e-07
RALGAPA1	0.695459	-0.523962	2.46295e-08	5.55504e-07
TMEM67	0.630827	-0.664684	2.56866e-08	5.78711e-07
RAI2	0.431439	-1.21277	2.62311e-08	5.90329e-07
SLC19A2	0.661105	-0.597049	2.6588e-08	5.97705e-07
SON	0.758287	-0.399184	2.68384e-08	6.02674e-07
PFAS	0.669311	-0.579252	2.69812e-08	6.04562e-07
ZBTB10	0.409301	-1.28877	2.69815e-08	6.04562e-07
PNMA2	0.283034	-1.82095	2.71406e-08	6.07463e-07
SLC4A7	0.556542	-0.845439	2.72459e-08	6.09154e-07
MTMR4	0.726125	-0.461711	2.73698e-08	6.1126e-07
GPATCH3	1.30639	0.385589	2.75367e-08	6.14317e-07
C5orf24	0.738336	-0.43765	2.77763e-08	6.1899e-07
KIF5B	0.734547	-0.445074	2.79713e-08	6.22657e-07
MRPL51	1.41091	0.496627	2.80742e-08	6.24271e-07
MCM9	0.647507	-0.627033	2.82575e-08	6.27665e-07
PLCB1	0.373225	-1.42188	2.84156e-08	6.30495e-07
FAM47E	0.370056	-1.43419	2.8469e-08	6.30975e-07
DNAJC8	1.25289	0.325259	2.84988e-08	6.30975e-07
SEC22B	0.71861	-0.476719	2.85398e-08	6.31201e-07
C1orf58	0.547523	-0.86901	2.87498e-08	6.35159e-07
RCL1	1.48899	0.574331	2.90264e-08	6.4058e-07
RPS6KA4	1.43974	0.525807	2.91092e-08	6.41716e-07
BNC1	9.01539	3.17239	2.91529e-08	6.4199e-07
CCDC124	1.37879	0.463403	2.92048e-08	6.42444e-07
C11orf54	0.660716	-0.597898	2.95147e-08	6.48565e-07
PLCB4	0.22027	-2.18265	2.9662e-08	6.51103e-07
MED12	0.721255	-0.471418	2.98845e-08	6.55257e-07
SSNA1	1.40178	0.48726	2.99151e-08	6.55257e-07
COMMD4	1.44705	0.53311	3.03612e-08	6.64318e-07
JOSD2	1.60668	0.684084	3.04694e-08	6.65975e-07
FXYD5	2.01511	1.01086	3.08923e-08	6.74498e-07
RNF138P1	0.642759	-0.63765	3.09588e-08	6.7523e-07
CLTA	1.38153	0.466268	3.12602e-08	6.80144e-07
TRIP11	0.692636	-0.529831	3.12645e-08	6.80144e-07
HYDIN	0.282094	-1.82575	3.12836e-08	6.80144e-07
ZNF224	0.634888	-0.655425	3.23457e-08	7.02491e-07
CREB3L1	0.289887	-1.78644	3.2671e-08	7.08805e-07
HOOK3	0.722677	-0.468576	3.28553e-08	7.12051e-07
NIT2	1.36224	0.445981	3.33015e-08	7.20958e-07
G3BP2	0.742465	-0.429605	3.35367e-08	7.25284e-07
PPM1B	0.762808	-0.390608	3.36678e-08	7.27351e-07
C9orf114	1.3305	0.411969	3.38506e-08	7.30533e-07
NCRNA00120	0.525966	-0.926959	3.4032e-08	7.33674e-07
MCOLN1	1.34724	0.430012	3.45478e-08	7.44011e-07
SMAD5	0.728443	-0.457112	3.48184e-08	7.48918e-07
ARHGAP22	2.18444	1.12726	3.48487e-08	7.48918e-07
SLC45A3	0.494006	-1.0174	3.49019e-08	7.49276e-07
SNHG6	1.62498	0.700419	3.50908e-08	7.52543e-07
PCDH17	0.504149	-0.988079	3.56303e-08	7.63315e-07
SOS1	0.766104	-0.384387	3.57722e-08	7.652e-07
ZNF665	0.407277	-1.29592	3.5793e-08	7.652e-07
SMURF2	0.664556	-0.589536	3.58548e-08	7.65382e-07
SEC63	0.763843	-0.388652	3.58761e-08	7.65382e-07
CCNI	0.599336	-0.738564	3.62247e-08	7.72016e-07
DAZAP1	1.25618	0.329045	3.63405e-08	7.73678e-07
C16orf71	0.560853	-0.834307	3.65369e-08	7.77053e-07
NHSL2	0.446731	-1.16252	3.65932e-08	7.77444e-07
CNBP	1.28035	0.356536	3.69273e-08	7.8373e-07
PDLIM1	1.73087	0.791501	3.79609e-08	8.04834e-07
ZNF275	0.635858	-0.653224	3.83418e-08	8.1207e-07
C19orf56	1.37627	0.460767	3.86338e-08	8.1741e-07
C16orf45	0.443971	-1.17146	3.87359e-08	8.17422e-07
TOM1L1	0.657638	-0.604633	3.87582e-08	8.17422e-07
C3orf15	0.220741	-2.17958	3.87865e-08	8.17422e-07
GADD45GIP1	1.64554	0.718562	3.87938e-08	8.17422e-07
EFNB1	2.13645	1.09522	3.89025e-08	8.1887e-07
NAA10	1.4836	0.569106	3.93282e-08	8.26981e-07
PPM1H	0.308839	-1.69507	3.98311e-08	8.36698e-07
SNRK	0.730119	-0.453796	4.03965e-08	8.47705e-07
FAM114A1	0.592493	-0.755131	4.10201e-08	8.59912e-07
APPBP2	0.762319	-0.391534	4.10755e-08	8.60194e-07
PCM1	0.714468	-0.485059	4.14076e-08	8.66264e-07
WFS1	0.629469	-0.667792	4.166e-08	8.70657e-07
SLC35A1	0.701868	-0.510728	4.18104e-08	8.7291e-07
ANAPC1	0.702791	-0.508832	4.21802e-08	8.79734e-07
ZFAND2A	1.53026	0.613777	4.24253e-08	8.83947e-07
SNX9	0.683025	-0.549989	4.26358e-08	8.8743e-07
LONRF2	0.247441	-2.01484	4.28139e-08	8.90235e-07
RBX1	1.3682	0.452283	4.34484e-08	9.02444e-07
EXOC5	0.761718	-0.392671	4.35196e-08	9.02444e-07
DNAH7	0.332442	-1.58882	4.35332e-08	9.02444e-07
SHH	0.282282	-1.82479	4.36469e-08	9.03718e-07
GALNT7	0.519124	-0.94585	4.36828e-08	9.03718e-07
RBM39	0.813985	-0.296925	4.37366e-08	9.03919e-07
ATAD2B	0.697156	-0.520446	4.41145e-08	9.10811e-07
OAS1	2.01824	1.0131	4.42553e-08	9.12798e-07
LOC100128842	0.487959	-1.03517	4.50257e-08	9.27755e-07
HSD17B1	1.96497	0.974511	4.51845e-08	9.30094e-07
CYTSA	0.749185	-0.416606	4.56771e-08	9.3929e-07
ZNF619	0.623583	-0.681347	4.58053e-08	9.40982e-07
PLCG1	0.684867	-0.546104	4.5907e-08	9.42127e-07
FAM110A	1.54902	0.631353	4.65068e-08	9.53482e-07
NFATC4	0.446326	-1.16383	4.66185e-08	9.54818e-07
LOC100133991	0.566342	-0.820254	4.68892e-08	9.59405e-07
DHTKD1	0.676539	-0.563756	4.74328e-08	9.69558e-07
GON4L	0.740165	-0.434081	4.76631e-08	9.73288e-07
USPL1	0.749989	-0.415058	4.77102e-08	9.73288e-07
LAGE3	1.53944	0.622409	4.78487e-08	9.74981e-07
ANXA8	6.91276	2.78926	4.78883e-08	9.74981e-07
SH3RF1	0.60575	-0.723206	4.79848e-08	9.75976e-07
CREB3L2	0.58915	-0.763294	4.80995e-08	9.77341e-07
FZD3	0.417436	-1.26037	4.85745e-08	9.86015e-07
IGDCC4	0.461922	-1.11428	4.91378e-08	9.96461e-07
MRTO4	1.38224	0.467005	4.94404e-08	1.00161e-06
DNAL1	0.688738	-0.537973	4.987e-08	1.00931e-06
AHCYL1	0.762513	-0.391167	5.0032e-08	1.01159e-06
SCUBE3	0.324465	-1.62387	5.05378e-08	1.02081e-06
GPAM	0.693802	-0.527403	5.12367e-08	1.03391e-06
LYSMD3	0.714645	-0.484701	5.12938e-08	1.03405e-06
FAM84B	0.62064	-0.688172	5.13882e-08	1.03493e-06
PURG	0.551168	-0.859435	5.2021e-08	1.04665e-06
DNAJC16	0.77151	-0.374243	5.23105e-08	1.05103e-06
CCDC59	1.29935	0.37779	5.23412e-08	1.05103e-06
RHOT1	0.77678	-0.364422	5.25333e-08	1.05385e-06
DMXL2	0.616405	-0.698049	5.32389e-08	1.06696e-06
C6orf165	0.337063	-1.56891	5.40851e-08	1.08286e-06
NECAP2	1.28756	0.364635	5.42331e-08	1.08477e-06
PPP1R14B	1.55863	0.640279	5.4624e-08	1.09065e-06
ARID4B	0.751245	-0.412645	5.46337e-08	1.09065e-06
PRRT2	0.487765	-1.03574	5.48895e-08	1.09379e-06
RBM26	0.777526	-0.363037	5.48975e-08	1.09379e-06
RAD23A	1.41983	0.505722	5.5404e-08	1.10281e-06
BDP1	0.702035	-0.510386	5.55581e-08	1.1048e-06
RPA3	1.3872	0.472174	5.58095e-08	1.10836e-06
PCDHGB6	0.453715	-1.14014	5.58452e-08	1.10836e-06
FARP2	0.609086	-0.715281	5.62652e-08	1.11562e-06
RASSF3	0.459592	-1.12157	5.64884e-08	1.11896e-06
SDHAF1	1.41955	0.505431	5.66523e-08	1.12113e-06
SFRS12	0.744554	-0.425551	5.68393e-08	1.12374e-06
ATP1B2	0.458282	-1.12569	5.72502e-08	1.13077e-06
RBM34	1.32169	0.402383	5.78383e-08	1.14129e-06
GALNTL1	0.274337	-1.86598	5.82347e-08	1.14801e-06
INPP1	2.11926	1.08356	5.85466e-08	1.15305e-06
ZBTB37	0.639347	-0.645329	5.86592e-08	1.15416e-06
NOP10	1.3853	0.470202	5.89496e-08	1.15876e-06
CDKN2D	1.62071	0.696623	5.92059e-08	1.16268e-06
UHMK1	0.41528	-1.26784	5.94965e-08	1.16727e-06
YTHDF3	0.792278	-0.335921	5.95709e-08	1.16761e-06
RFXANK	1.46524	0.551137	5.9789e-08	1.17077e-06
VEZF1	0.708611	-0.496933	6.07293e-08	1.18805e-06
CHST4	0.280297	-1.83497	6.12163e-08	1.19643e-06
ACSS3	0.322411	-1.63303	6.14031e-08	1.19894e-06
CAPN7	0.753716	-0.407907	6.15128e-08	1.19992e-06
IYD	0.302896	-1.72311	6.15702e-08	1.19992e-06
DLAT	0.698451	-0.517769	6.24356e-08	1.21563e-06
MGAT3	0.305437	-1.71105	6.25487e-08	1.21667e-06
FAM106C	0.51101	-0.968578	6.28158e-08	1.22071e-06
PABPC5	0.54985	-0.86289	6.29316e-08	1.2218e-06
TSTD2	0.605459	-0.723898	6.32897e-08	1.22742e-06
SEMA3D	0.294587	-1.76323	6.33405e-08	1.22742e-06
CAPN5	0.356122	-1.48956	6.382e-08	1.23512e-06
GLRX2	1.43966	0.52573	6.38585e-08	1.23512e-06
C11orf95	0.622267	-0.684394	6.44875e-08	1.24611e-06
CPT1A	0.590254	-0.760591	6.48738e-08	1.25134e-06
RPS15AP10	0.63127	-0.66367	6.48801e-08	1.25134e-06
RBBP5	0.664053	-0.59063	6.49541e-08	1.25159e-06
NDUFS1	0.735493	-0.443216	6.51322e-08	1.25384e-06
CDCA4	1.41976	0.505649	6.54211e-08	1.25822e-06
SFRS2IP	0.772559	-0.372283	6.55509e-08	1.25954e-06
C6orf186	0.487043	-1.03788	6.59597e-08	1.2662e-06
EBF2	0.705417	-0.503452	6.65278e-08	1.27591e-06
ZDHHC17	0.759184	-0.397479	6.68173e-08	1.28027e-06
ABCC6P2	0.369689	-1.43562	6.69388e-08	1.2814e-06
ZNF593	1.56041	0.641924	6.72398e-08	1.28596e-06
MPHOSPH8	0.730609	-0.45283	6.74945e-08	1.28963e-06
ZBTB49	0.764654	-0.387122	6.76771e-08	1.29191e-06
SFRS14	0.716757	-0.480444	6.78244e-08	1.29352e-06
SSSCA1	1.4272	0.513184	6.80957e-08	1.29749e-06
IFI6	2.70016	1.43304	6.84208e-08	1.30247e-06
BRIX1	1.42209	0.508008	6.85277e-08	1.3033e-06
RPL13	1.57074	0.651448	6.86137e-08	1.30372e-06
MCF2L	0.372159	-1.42601	6.86832e-08	1.30384e-06
FN3K	0.503719	-0.98931	6.94753e-08	1.31765e-06
TUBA4A	2.00156	1.00112	6.97753e-08	1.32212e-06
TRIP6	1.55069	0.632908	6.99973e-08	1.3251e-06
RSPH4A	0.373709	-1.42001	7.03094e-08	1.32923e-06
ENPP1	0.348414	-1.52113	7.0345e-08	1.32923e-06
NSDHL	1.38845	0.473472	7.05424e-08	1.33173e-06
DDX49	1.36524	0.44916	7.19456e-08	1.35697e-06
HFM1	0.530815	-0.913718	7.20537e-08	1.35776e-06
ZNF322A	0.705579	-0.503121	7.24562e-08	1.36409e-06
SIDT2	0.693637	-0.527748	7.26066e-08	1.36567e-06
MYL12B	1.45162	0.537667	7.27681e-08	1.36745e-06
USP47	0.776085	-0.365714	7.31345e-08	1.37308e-06
RPS6	1.57492	0.655275	7.34043e-08	1.37689e-06
PPAN	1.44193	0.528002	7.36504e-08	1.37963e-06
NUDT2	1.45989	0.545863	7.36851e-08	1.37963e-06
LOC402377	0.581616	-0.78186	7.3936e-08	1.38306e-06
MT2A	2.3574	1.2372	7.50747e-08	1.40308e-06
MOB2	1.35001	0.432974	7.52674e-08	1.40476e-06
HINT3	0.730814	-0.452424	7.53017e-08	1.40476e-06
ATXN2	0.796697	-0.327897	7.55068e-08	1.40669e-06
RIMKLA	0.235365	-2.08703	7.56029e-08	1.40669e-06
ADAMTS5	0.442188	-1.17727	7.56768e-08	1.40669e-06
LHX4	0.59418	-0.751028	7.56941e-08	1.40669e-06
CLINT1	0.693772	-0.527467	7.57481e-08	1.40669e-06
SFRS11	0.762495	-0.391201	7.58648e-08	1.40758e-06
CTTNBP2	0.307996	-1.69902	7.61033e-08	1.41073e-06
IRF9	1.52723	0.610917	7.6218e-08	1.41158e-06
MYOCD	0.426695	-1.22872	7.67803e-08	1.42071e-06
OAS2	2.25258	1.17158	7.69441e-08	1.42246e-06
C1orf170	2.31191	1.20908	7.73875e-08	1.42937e-06
MORN4	0.53132	-0.912348	7.77226e-08	1.43427e-06
COG6	0.706773	-0.50068	7.83278e-08	1.44413e-06
DDI2	0.371241	-1.42957	7.89045e-08	1.45346e-06
LRRC10B	0.333464	-1.5844	7.95582e-08	1.46418e-06
C9orf129	0.454841	-1.13656	8.01813e-08	1.47377e-06
ZNF667	0.322014	-1.63481	8.0223e-08	1.47377e-06
MLLT4	0.687214	-0.541168	8.07328e-08	1.48181e-06
C18orf21	1.36437	0.448237	8.10691e-08	1.48469e-06
CAPN6	0.225017	-2.1519	8.10989e-08	1.48469e-06
EIF5AL1	1.39824	0.48361	8.11069e-08	1.48469e-06
SPRY1	0.506553	-0.981213	8.12082e-08	1.48522e-06
NT5C	1.46308	0.549009	8.13779e-08	1.487e-06
RANBP2	0.749764	-0.415492	8.15365e-08	1.48857e-06
ZSCAN29	0.736667	-0.440916	8.24425e-08	1.50377e-06
FAM171A2	0.356789	-1.48686	8.26282e-08	1.50582e-06
MAP2K2	1.34982	0.432771	8.28019e-08	1.50764e-06
C17orf80	0.750623	-0.413841	8.31869e-08	1.51331e-06
ZNF780B	0.625473	-0.67698	8.45332e-08	1.53644e-06
TDGF1	0.318992	-1.64841	8.50445e-08	1.54436e-06
C19orf70	1.46469	0.5506	8.52767e-08	1.54651e-06
ZNF423	0.403895	-1.30795	8.5314e-08	1.54651e-06
C1orf9	0.716372	-0.481218	8.55029e-08	1.54857e-06
CYB5R1	1.64379	0.717025	8.56554e-08	1.54996e-06
EIF3A	0.717911	-0.478123	8.59673e-08	1.55423e-06
NBEA	0.280284	-1.83504	8.61152e-08	1.55554e-06
KDR	0.531827	-0.910972	8.63071e-08	1.55763e-06
TOX3	0.146673	-2.76933	8.65184e-08	1.56007e-06
ELOF1	1.34877	0.43164	8.67908e-08	1.56361e-06
REEP4	1.52225	0.606207	8.69461e-08	1.56503e-06
PPIL5	1.31088	0.390534	8.71452e-08	1.56724e-06
ZC3H7B	0.757743	-0.400219	8.78649e-08	1.5788e-06
GPR87	5.75029	2.52363	8.85393e-08	1.58952e-06
PPP1R9A	0.191913	-2.38148	8.86241e-08	1.58965e-06
CDKL5	0.442484	-1.1763	8.93907e-08	1.602e-06
RNFT1	0.679155	-0.558187	8.95191e-08	1.6029e-06
CHD2	0.772026	-0.373278	8.97543e-08	1.60571e-06
ZNF491	0.504465	-0.987174	9.01853e-08	1.61201e-06
EPHA7	0.262531	-1.92944	9.11429e-08	1.62671e-06
GJB5	3.61303	1.85321	9.11664e-08	1.62671e-06
MED13	0.754973	-0.405504	9.1538e-08	1.63192e-06
PUS7L	0.704512	-0.505304	9.17139e-08	1.63364e-06
LPIN2	0.529445	-0.917447	9.31623e-08	1.65796e-06
FAT4	0.43213	-1.21046	9.32409e-08	1.65796e-06
AKAP1	0.687486	-0.540597	9.39365e-08	1.66888e-06
MEIS3P1	0.414503	-1.27055	9.4473e-08	1.67696e-06
RRN3	0.780339	-0.357828	9.4925e-08	1.68352e-06
IMPG2	0.664964	-0.588652	9.54696e-08	1.69172e-06
C10orf137	0.760448	-0.395079	9.77547e-08	1.73071e-06
C8orf39	0.655297	-0.609779	9.79207e-08	1.73216e-06
ZNF200	0.798415	-0.32479	9.80649e-08	1.73238e-06
CAT	0.617497	-0.695497	9.81841e-08	1.73238e-06
TOP2B	0.726184	-0.461594	9.8187e-08	1.73238e-06
RHOBTB1	0.556452	-0.845672	9.84126e-08	1.73388e-06
MRPS24	1.40012	0.485548	9.8441e-08	1.73388e-06
LOC100132707	0.656887	-0.606282	9.88694e-08	1.73853e-06
TAF2	0.690844	-0.533569	9.88745e-08	1.73853e-06
POLN	0.486521	-1.03942	9.97567e-08	1.75198e-06
SLC30A2	0.255822	-1.96679	9.98143e-08	1.75198e-06
FAM120B	0.745599	-0.423529	9.98958e-08	1.75198e-06
RNF7	1.36108	0.444755	1.00451e-07	1.75948e-06
FAM179B	0.682662	-0.550756	1.00495e-07	1.75948e-06
RGL3	0.192292	-2.37863	1.00596e-07	1.75974e-06
FBXO33	0.795329	-0.330376	1.01177e-07	1.76839e-06
ANXA2	1.59422	0.672853	1.01431e-07	1.77133e-06
CACNB2	0.572052	-0.805782	1.01684e-07	1.77423e-06
SLC30A1	0.6302	-0.666118	1.02847e-07	1.79299e-06
ZNF621	0.694879	-0.525166	1.03279e-07	1.79752e-06
TP53BP1	0.732279	-0.449534	1.03281e-07	1.79752e-06
MELK	1.40445	0.490004	1.03474e-07	1.79934e-06
MRPL23	1.54621	0.628735	1.04372e-07	1.81341e-06
CDC42BPB	0.703803	-0.506756	1.04592e-07	1.8157e-06
LOC149837	0.442374	-1.17666	1.04682e-07	1.81573e-06
PCDHGA5	0.500314	-0.999094	1.04857e-07	1.81723e-06
ZNF248	0.731446	-0.451176	1.05254e-07	1.82256e-06
APRT	1.43932	0.525391	1.05525e-07	1.82571e-06
PRDX3	0.751666	-0.411837	1.0567e-07	1.82668e-06
EEFSEC	1.40631	0.491918	1.05931e-07	1.82966e-06
ZNF396	0.614516	-0.702478	1.07257e-07	1.851e-06
NDUFA11	1.47402	0.559752	1.07397e-07	1.85185e-06
C19orf55	0.593407	-0.752905	1.07584e-07	1.85352e-06
USP24	0.790896	-0.338439	1.08789e-07	1.87181e-06
ZNF623	0.692935	-0.529207	1.08828e-07	1.87181e-06
PDE1A	0.453813	-1.13983	1.09017e-07	1.87349e-06
SH3GL1	1.34193	0.424305	1.0913e-07	1.87386e-06
MRPS30	1.39657	0.481886	1.09601e-07	1.88037e-06
LMNA	1.51138	0.59587	1.09709e-07	1.88065e-06
CP110	0.705533	-0.503214	1.09972e-07	1.88357e-06
FAM58A	1.41787	0.503721	1.10667e-07	1.8939e-06
CDH6	0.357618	-1.48351	1.10976e-07	1.89761e-06
PVT1	1.79905	0.847232	1.11698e-07	1.90836e-06
C19orf50	1.2452	0.316376	1.11939e-07	1.90978e-06
GPR68	2.61675	1.38778	1.11968e-07	1.90978e-06
SLC30A6	0.653892	-0.612875	1.13454e-07	1.93291e-06
GALNT4	0.50385	-0.988934	1.13512e-07	1.93291e-06
PUM1	0.795524	-0.330024	1.13745e-07	1.93527e-06
SAC3D1	1.51102	0.595524	1.14428e-07	1.94527e-06
PPAP2B	0.564834	-0.824102	1.14766e-07	1.9494e-06
EMX2	0.262552	-1.92933	1.15696e-07	1.96357e-06
ZMYND8	0.673286	-0.57071	1.1586e-07	1.96473e-06
NHS	0.493912	-1.01767	1.16109e-07	1.96732e-06
DDX17	0.810786	-0.302607	1.16895e-07	1.97645e-06
TPP2	0.759213	-0.397423	1.16931e-07	1.97645e-06
TRPC4AP	0.798173	-0.325226	1.16936e-07	1.97645e-06
CYFIP2	0.474104	-1.07672	1.17803e-07	1.98945e-06
NDUFA7	1.46817	0.554022	1.18305e-07	1.99628e-06
KLHDC9	0.422634	-1.24252	1.18852e-07	2.00386e-06
MKLN1	0.804021	-0.314695	1.20142e-07	2.02395e-06
SLC2A13	0.471811	-1.08372	1.20419e-07	2.02696e-06
ABI2	0.682285	-0.551554	1.21032e-07	2.03468e-06
STOML1	1.46349	0.549415	1.21076e-07	2.03468e-06
BGLAP	1.63862	0.712477	1.21707e-07	2.04359e-06
BTBD3	0.570296	-0.810216	1.2213e-07	2.04902e-06
LSM5	1.33007	0.411498	1.2265e-07	2.05607e-06
EFNB3	0.362216	-1.46508	1.22859e-07	2.05788e-06
HSPA13	0.711873	-0.490309	1.23265e-07	2.06301e-06
C9orf40	1.48963	0.574954	1.24172e-07	2.07648e-06
ZNF235	0.675651	-0.56565	1.25417e-07	2.09559e-06
NME5	0.340932	-1.55244	1.25841e-07	2.10098e-06
UEVLD	0.690396	-0.534503	1.26041e-07	2.1026e-06
ZNF434	0.821506	-0.283657	1.2616e-07	2.10288e-06
ZNF280D	0.748127	-0.418645	1.27829e-07	2.12896e-06
SLC45A1	0.492383	-1.02215	1.28971e-07	2.14624e-06
MMP28	4.23367	2.08191	1.29856e-07	2.15921e-06
TET3	0.66622	-0.58593	1.30124e-07	2.16192e-06
SYNGAP1	0.660967	-0.597349	1.30286e-07	2.16286e-06
KLHL28	0.688115	-0.539279	1.31102e-07	2.17464e-06
HOXB3	0.400452	-1.3203	1.31889e-07	2.18593e-06
ZNF550	0.538752	-0.892307	1.32456e-07	2.19354e-06
ALG9	0.732426	-0.449246	1.33232e-07	2.20462e-06
CADM1	0.340218	-1.55547	1.34203e-07	2.2189e-06
C20orf165	0.61827	-0.693692	1.37141e-07	2.26565e-06
TTC26	0.642838	-0.637473	1.37878e-07	2.27533e-06
C11orf30	0.704603	-0.505117	1.3795e-07	2.27533e-06
ZMYM1	0.715955	-0.482059	1.38617e-07	2.28451e-06
TFAM	0.76395	-0.388451	1.39845e-07	2.30289e-06
FAM190A	0.377032	-1.40724	1.40508e-07	2.31196e-06
SALL4	0.329816	-1.60027	1.41548e-07	2.3272e-06
C14orf118	0.687783	-0.539976	1.42322e-07	2.33804e-06
RNF181	1.38518	0.47007	1.42748e-07	2.34318e-06
LOC100131193	0.545653	-0.873944	1.43083e-07	2.34539e-06
ATP6V0A4	0.252656	-1.98475	1.43112e-07	2.34539e-06
GMFB	0.770509	-0.376117	1.43343e-07	2.3473e-06
NBPF7	0.713854	-0.4863	1.43597e-07	2.34776e-06
TECPR1	0.612956	-0.706145	1.436e-07	2.34776e-06
CCDC65	0.45053	-1.1503	1.44137e-07	2.35466e-06
ZNF141	0.584365	-0.775059	1.44536e-07	2.35763e-06
CDC14C	0.606487	-0.721452	1.44549e-07	2.35763e-06
TMEM66	0.752899	-0.409473	1.47078e-07	2.39698e-06
MFHAS1	0.488196	-1.03447	1.47942e-07	2.40914e-06
GPR17	0.536137	-0.899327	1.48136e-07	2.41039e-06
PSME1	1.39282	0.478007	1.48515e-07	2.41464e-06
GBP6	7.94485	2.99002	1.49416e-07	2.42736e-06
ANKRD26	0.688361	-0.538763	1.50484e-07	2.44277e-06
PDE11A	0.38685	-1.37015	1.5107e-07	2.45005e-06
ADD3	0.588075	-0.765928	1.51171e-07	2.45005e-06
SEC16A	0.759763	-0.396379	1.53645e-07	2.48817e-06
DSC3	10.1152	3.33845	1.54181e-07	2.49489e-06
RHOJ	0.545892	-0.873312	1.54498e-07	2.49805e-06
PA2G4	1.29886	0.377243	1.5514e-07	2.50644e-06
UTRN	0.579753	-0.786489	1.5728e-07	2.53902e-06
SLC30A5	0.778373	-0.361466	1.60136e-07	2.58308e-06
ZNF546	0.63913	-0.645818	1.60783e-07	2.58947e-06
BAZ2B	0.708041	-0.498094	1.60784e-07	2.58947e-06
MACF1	0.70439	-0.505554	1.61431e-07	2.59784e-06
SCYL2	0.686098	-0.543513	1.62614e-07	2.61483e-06
IFI44	2.38464	1.25377	1.64002e-07	2.63455e-06
HMGN2	1.40168	0.487152	1.64097e-07	2.63455e-06
AFF1	0.687853	-0.539829	1.64302e-07	2.63577e-06
SRD5A1	1.79845	0.846754	1.65691e-07	2.65597e-06
CTU1	1.5425	0.625274	1.66093e-07	2.66034e-06
PPP4C	1.26864	0.343279	1.66998e-07	2.67276e-06
AGTRAP	1.49417	0.579343	1.6815e-07	2.68908e-06
MYRIP	0.331307	-1.59376	1.68474e-07	2.69217e-06
PARL	1.36548	0.449403	1.69627e-07	2.70849e-06
LRRC37A4	0.479444	-1.06057	1.70004e-07	2.7124e-06
C14orf80	1.48562	0.57107	1.70301e-07	2.71502e-06
TMEM191A	1.68616	0.753745	1.70613e-07	2.71787e-06
UQCC	0.750617	-0.413851	1.70988e-07	2.72173e-06
EFHC1	0.574839	-0.798771	1.7272e-07	2.74717e-06
HCST	2.2037	1.13993	1.764e-07	2.80353e-06
ZNF534	1.47666	0.562333	1.7674e-07	2.80676e-06
DNAJC10	0.654923	-0.610603	1.77235e-07	2.81045e-06
HSBP1L1	1.61476	0.691323	1.77246e-07	2.81045e-06
C5orf41	0.63536	-0.654353	1.77666e-07	2.81492e-06
TMEM100	0.330289	-1.5982	1.78057e-07	2.81709e-06
TPRKB	1.3185	0.398895	1.78078e-07	2.81709e-06
ARPC3	1.29884	0.377228	1.78827e-07	2.82676e-06
ATP5J2	1.50267	0.587526	1.79001e-07	2.82733e-06
PJA2	0.722231	-0.469468	1.80572e-07	2.84995e-06
SHANK1	0.46783	-1.09594	1.81164e-07	2.85709e-06
RASA2	0.488004	-1.03503	1.81537e-07	2.86078e-06
STXBP2	1.307	0.386258	1.81905e-07	2.86438e-06
CSTB	2.04297	1.03067	1.82138e-07	2.86585e-06
RC3H2	0.673826	-0.569552	1.84107e-07	2.89297e-06
FMO5	0.39376	-1.34461	1.84144e-07	2.89297e-06
SMAD9	0.398175	-1.32853	1.84423e-07	2.89513e-06
S100A10	1.94684	0.961131	1.85576e-07	2.911e-06
PAR5	0.491969	-1.02336	1.85941e-07	2.9145e-06
POC1B	0.69381	-0.527387	1.86764e-07	2.92517e-06
KIAA0020	1.42562	0.511587	1.88843e-07	2.95546e-06
ANP32B	1.35328	0.436459	1.89128e-07	2.95766e-06
MBD2	1.44213	0.528201	1.92672e-07	3.01079e-06
CKAP5	0.735473	-0.443255	1.93835e-07	3.02667e-06
ADAM10	0.555534	-0.848052	1.96238e-07	3.06078e-06
MAP3K6	1.66159	0.732564	1.96318e-07	3.06078e-06
ACOT7	1.52469	0.60852	1.9665e-07	3.06361e-06
USF2	1.31513	0.3952	1.96823e-07	3.06399e-06
ARNT	0.795964	-0.329224	1.97192e-07	3.0674e-06
PCDHGA12	0.492496	-1.02182	1.97987e-07	3.07743e-06
IKZF4	0.712554	-0.48893	1.98197e-07	3.07836e-06
MRPL4	1.43776	0.523824	1.99252e-07	3.0912e-06
C1orf50	1.28323	0.359777	1.99325e-07	3.0912e-06
PRELID1	1.39499	0.480257	2.00893e-07	3.11316e-06
FBXL15	1.44344	0.529511	2.012e-07	3.11556e-06
CGNL1	0.396804	-1.3335	2.01602e-07	3.11943e-06
ZNF627	0.703684	-0.507001	2.01951e-07	3.12163e-06
C14orf135	0.710868	-0.492346	2.02049e-07	3.12163e-06
SRM	1.46899	0.554823	2.0248e-07	3.12593e-06
ASAH1	0.675248	-0.56651	2.03645e-07	3.14156e-06
TP63	7.07634	2.823	2.04136e-07	3.14677e-06
UBE2L6	1.70335	0.768371	2.04714e-07	3.1533e-06
RAB11FIP4	0.620743	-0.687933	2.07405e-07	3.19112e-06
ATG3	1.32434	0.405279	2.07494e-07	3.19112e-06
GNS	0.738084	-0.438144	2.07636e-07	3.19112e-06
C1orf88	0.245452	-2.02649	2.07881e-07	3.19248e-06
NEK9	0.770212	-0.376672	2.08685e-07	3.20245e-06
KRT17	4.10867	2.03867	2.08861e-07	3.20274e-06
SIRT6	1.34323	0.42571	2.09798e-07	3.21471e-06
GSR	0.566266	-0.820449	2.10284e-07	3.21975e-06
ARL5B	0.612746	-0.706638	2.10952e-07	3.22756e-06
GLI4	1.55473	0.636661	2.12706e-07	3.25198e-06
C16orf13	1.48487	0.570334	2.13325e-07	3.259e-06
STARD5	2.24582	1.16724	2.14484e-07	3.27428e-06
ZNF510	0.754944	-0.405558	2.17505e-07	3.31793e-06
ACAD8	0.704821	-0.50467	2.19046e-07	3.33894e-06
C12orf53	0.4109	-1.28314	2.21451e-07	3.37309e-06
TYROBP	2.10587	1.07442	2.21803e-07	3.37595e-06
C1orf192	0.318108	-1.65241	2.26271e-07	3.44102e-06
COPA	0.768133	-0.380572	2.26414e-07	3.44102e-06
NDUFB11	1.45287	0.538907	2.28339e-07	3.4677e-06
DOCK7	0.690114	-0.535094	2.30352e-07	3.49568e-06
VWA2	0.308648	-1.69597	2.30735e-07	3.49708e-06
CHD1	0.766816	-0.383048	2.30785e-07	3.49708e-06
FBXO22OS	1.44885	0.534904	2.3198e-07	3.5126e-06
CASP8AP2	0.657396	-0.605165	2.33529e-07	3.53124e-06
TAX1BP3	1.47814	0.563787	2.33556e-07	3.53124e-06
KLHDC7B	4.44344	2.15168	2.34284e-07	3.53964e-06
TAP1	1.90074	0.926565	2.34562e-07	3.54123e-06
KRT15	5.78714	2.53285	2.35879e-07	3.55571e-06
MRPS22	1.33148	0.413036	2.35915e-07	3.55571e-06
CHCHD5	1.55814	0.63982	2.36041e-07	3.55571e-06
LST1	2.11504	1.08068	2.36818e-07	3.56479e-06
TTC28	0.571404	-0.807416	2.37083e-07	3.56616e-06
PSMB4	1.30986	0.389416	2.38974e-07	3.59197e-06
C9orf69	1.32527	0.40629	2.39763e-07	3.60118e-06
PAN2	0.705555	-0.503169	2.4236e-07	3.63753e-06
SNRPC	1.33737	0.419394	2.42641e-07	3.63908e-06
ETV3	0.447747	-1.15925	2.44369e-07	3.65972e-06
TNFSF15	0.477854	-1.06536	2.44374e-07	3.65972e-06
CCPG1	0.652934	-0.614991	2.4565e-07	3.67614e-06
MYL6	1.35305	0.436212	2.46675e-07	3.68879e-06
BTG3	1.4134	0.499169	2.47235e-07	3.69446e-06
C17orf103	0.636441	-0.651901	2.47812e-07	3.7004e-06
WDR19	0.630923	-0.664463	2.50858e-07	3.74314e-06
PARK2	0.484186	-1.04637	2.52349e-07	3.76266e-06
KIAA1012	0.729091	-0.455829	2.52533e-07	3.76266e-06
UHRF1BP1L	0.714417	-0.485161	2.53401e-07	3.77285e-06
VPS29	1.22696	0.295089	2.5387e-07	3.77709e-06
SIGMAR1	1.3823	0.467074	2.56644e-07	3.8156e-06
SOBP	0.382201	-1.3876	2.56977e-07	3.81779e-06
RELB	1.56918	0.650012	2.57201e-07	3.81835e-06
NUP160	0.759794	-0.39632	2.5864e-07	3.83692e-06
GMCL1L	0.645431	-0.631666	2.59025e-07	3.83986e-06
HES1	1.59165	0.670527	2.59924e-07	3.8504e-06
FAM161B	0.531744	-0.911195	2.62249e-07	3.88205e-06
SALL2	0.384898	-1.37745	2.64557e-07	3.91339e-06
LOC100132247	0.568386	-0.815056	2.67531e-07	3.95453e-06
RBPMS2	0.38702	-1.36952	2.67798e-07	3.95561e-06
RPL36AL	1.36369	0.447511	2.68078e-07	3.95691e-06
UBXN10	0.233893	-2.09608	2.6924e-07	3.97119e-06
COX4I1	1.41472	0.500522	2.69897e-07	3.97802e-06
RHOQ	0.687198	-0.541202	2.758e-07	4.06211e-06
TMEM2	0.568813	-0.813973	2.76278e-07	4.06623e-06
ANO5	0.350565	-1.51224	2.78074e-07	4.08879e-06
MAD1L1	1.32238	0.403142	2.7821e-07	4.08879e-06
EIF2B3	1.2895	0.366808	2.78427e-07	4.08905e-06
MLL5	0.657199	-0.605598	2.79083e-07	4.09234e-06
ZKSCAN3	0.663584	-0.591649	2.79128e-07	4.09234e-06
PIP5K1B	0.301379	-1.73035	2.7925e-07	4.09234e-06
C6orf170	0.616351	-0.698177	2.79654e-07	4.09533e-06
ETNK1	0.676086	-0.564722	2.82228e-07	4.13007e-06
GNB2	1.32362	0.404487	2.85451e-07	4.17261e-06
FAM45B	0.594995	-0.749051	2.85542e-07	4.17261e-06
PSMG4	1.51065	0.595167	2.86068e-07	4.17732e-06
C14orf37	0.459425	-1.1221	2.86402e-07	4.17923e-06
B2M	1.77085	0.824441	2.88119e-07	4.19755e-06
APAF1	0.737792	-0.438714	2.88179e-07	4.19755e-06
STAP2	1.63659	0.710696	2.88272e-07	4.19755e-06
PMF1	1.31064	0.390271	2.88725e-07	4.20117e-06
CSNK2A1P	0.60029	-0.736268	2.89121e-07	4.20395e-06
USP9X	0.747858	-0.419163	2.89364e-07	4.20449e-06
SNRPD1	1.31575	0.395882	2.90354e-07	4.21589e-06
C10orf93	0.380004	-1.39591	2.92106e-07	4.23833e-06
DNAJC9	1.26878	0.343444	2.92566e-07	4.24199e-06
TMED10P1	0.755711	-0.404094	2.92807e-07	4.2425e-06
MMAB	1.41547	0.501282	2.94806e-07	4.26845e-06
ZNF12	0.792855	-0.334871	2.96138e-07	4.2847e-06
CRYM	0.22206	-2.17098	2.97967e-07	4.30812e-06
COPE	1.3152	0.395283	2.9823e-07	4.30889e-06
HSPA6	2.03901	1.02787	2.98748e-07	4.31332e-06
PKP3	1.91479	0.937188	3.03775e-07	4.38283e-06
C9orf102	0.586482	-0.769842	3.04649e-07	4.39235e-06
AIF1	2.04413	1.03149	3.05881e-07	4.40701e-06
SOX15	4.15366	2.05438	3.06478e-07	4.4125e-06
SPRED2	0.605734	-0.723243	3.07235e-07	4.42031e-06
HEATR3	0.699735	-0.51512	3.0798e-07	4.42791e-06
NMB	1.88854	0.917275	3.08356e-07	4.43022e-06
PRKAA2	0.27568	-1.85894	3.10035e-07	4.45122e-06
EXOSC8	1.41331	0.499079	3.12252e-07	4.47991e-06
IFT88	0.667741	-0.58264	3.13809e-07	4.4991e-06
ZNF33A	0.758484	-0.39881	3.14319e-07	4.50327e-06
THOC7	1.36774	0.451798	3.17232e-07	4.54182e-06
CLOCK	0.600833	-0.734965	3.1842e-07	4.55565e-06
TMTC1	0.336285	-1.57225	3.21627e-07	4.59832e-06
DKFZp686O24166	0.384221	-1.37999	3.21941e-07	4.59951e-06
SH2D2A	1.94126	0.956994	3.22159e-07	4.59951e-06
POLI	0.683626	-0.548721	3.23348e-07	4.61328e-06
RHOD	1.90177	0.927341	3.24146e-07	4.61721e-06
ARMC3	0.235214	-2.08795	3.24269e-07	4.61721e-06
FLJ90757	0.619109	-0.691734	3.24299e-07	4.61721e-06
LSM14B	0.755714	-0.404087	3.25954e-07	4.63755e-06
WDR78	0.433678	-1.2053	3.2759e-07	4.65759e-06
ADAMTSL1	0.423732	-1.23878	3.28025e-07	4.66055e-06
ZNF609	0.726676	-0.460616	3.28788e-07	4.66816e-06
SRA1	1.36163	0.44534	3.29726e-07	4.67631e-06
RIN1	1.92179	0.942448	3.29819e-07	4.67631e-06
EPB41	0.719948	-0.474036	3.30509e-07	4.68176e-06
FZD4	0.530914	-0.913449	3.30806e-07	4.68176e-06
C15orf28	0.61602	-0.698951	3.30888e-07	4.68176e-06
PTCH1	0.498918	-1.00312	3.3571e-07	4.74671e-06
RNF19B	1.55238	0.634482	3.36101e-07	4.74897e-06
FGFRL1	0.540198	-0.888439	3.37022e-07	4.7587e-06
ADK	1.3838	0.468638	3.37638e-07	4.76411e-06
SAP30BP	1.30948	0.38899	3.38518e-07	4.77325e-06
SLC5A9	0.431403	-1.21289	3.39667e-07	4.78616e-06
ZBTB40	0.741782	-0.430932	3.43517e-07	4.83708e-06
MIA3	0.76639	-0.38385	3.44387e-07	4.846e-06
GPR20	0.533248	-0.907121	3.44851e-07	4.84642e-06
KIF5A	0.448819	-1.1558	3.44889e-07	4.84642e-06
SMTNL2	0.33088	-1.59562	3.4593e-07	4.85611e-06
SFRS18	0.741492	-0.431497	3.46053e-07	4.85611e-06
KIAA1107	0.593864	-0.751796	3.48839e-07	4.89185e-06
TAPT1	0.739149	-0.436063	3.49279e-07	4.89468e-06
C10orf18	0.72884	-0.456326	3.53018e-07	4.9437e-06
CRYL1	0.596103	-0.746366	3.53967e-07	4.95361e-06
SP4	0.645578	-0.631337	3.56775e-07	4.9895e-06
PGM3	0.694178	-0.526622	3.59863e-07	5.02925e-06
PCDHGA4	0.480958	-1.05602	3.60686e-07	5.03732e-06
ZNHIT1	1.44538	0.531453	3.61369e-07	5.04342e-06
C19orf20	1.72808	0.789173	3.65668e-07	5.09995e-06
MUDENG	0.776324	-0.365268	3.67375e-07	5.12027e-06
ATP6V1G2	0.575358	-0.797468	3.67821e-07	5.123e-06
PFN1	1.33858	0.420703	3.70041e-07	5.15043e-06
LMBRD2	0.578676	-0.789172	3.70302e-07	5.15057e-06
REXO4	1.28708	0.364097	3.70716e-07	5.15283e-06
LAG3	2.4748	1.30731	3.71378e-07	5.15854e-06
ABCA11P	0.635199	-0.654721	3.72202e-07	5.16648e-06
LOC150381	1.65927	0.73055	3.75582e-07	5.20987e-06
BSN	0.490605	-1.02737	3.78572e-07	5.2478e-06
DLGAP4	0.761372	-0.393327	3.79288e-07	5.25416e-06
MRPS17	1.49488	0.580031	3.80595e-07	5.26871e-06
KIAA0430	0.794327	-0.332195	3.83369e-07	5.30353e-06
AGBL4	0.530314	-0.915082	3.83722e-07	5.30484e-06
ABHD13	0.787321	-0.344977	3.8483e-07	5.31657e-06
PPT2	0.695406	-0.524073	3.85308e-07	5.31958e-06
KIAA0895	0.565406	-0.822642	3.8785e-07	5.35107e-06
DPY19L4	0.749854	-0.415318	3.91203e-07	5.3937e-06
PRKAR1A	0.762103	-0.391942	3.91788e-07	5.39814e-06
RNF160	0.754718	-0.40599	3.96716e-07	5.46237e-06
PCDHGA3	0.577426	-0.792292	3.98585e-07	5.48442e-06
DCLK2	0.496018	-1.01154	4.013e-07	5.51808e-06
NOSIP	1.47679	0.56246	4.02075e-07	5.5236e-06
BARD1	0.431976	-1.21098	4.02241e-07	5.5236e-06
OXR1	0.692276	-0.53058	4.0264e-07	5.52538e-06
TCEB2	1.40923	0.494904	4.03554e-07	5.53422e-06
EIF4EBP3	1.68331	0.7513	4.04307e-07	5.54084e-06
LOC387646	0.507451	-0.978659	4.04588e-07	5.54099e-06
PHOSPHO1	0.496115	-1.01125	4.05472e-07	5.54939e-06
FIGNL2	0.532103	-0.910224	4.06717e-07	5.56271e-06
TIMM16	1.48304	0.568555	4.07139e-07	5.56478e-06
ZNF608	0.312303	-1.67898	4.08712e-07	5.58256e-06
C16orf74	2.41107	1.26967	4.12375e-07	5.62883e-06
KIF2A	0.713589	-0.486834	4.16813e-07	5.68563e-06
LEPROT	0.49358	-1.01864	4.19384e-07	5.71469e-06
IL15	2.1333	1.09308	4.19501e-07	5.71469e-06
WDR35	0.637505	-0.649492	4.20263e-07	5.72126e-06
FAM171A1	0.411346	-1.28157	4.22294e-07	5.7451e-06
KCNE3	0.460614	-1.11837	4.23574e-07	5.7587e-06
TFEB	1.48793	0.573311	4.25505e-07	5.78111e-06
LOC642852	0.643231	-0.636591	4.26835e-07	5.79535e-06
DDB1	0.827448	-0.27326	4.28552e-07	5.81481e-06
PAFAH2	0.726904	-0.460163	4.34077e-07	5.88386e-06
NEDD8	1.27432	0.349726	4.34215e-07	5.88386e-06
HTR2A	0.593927	-0.751641	4.3478e-07	5.88762e-06
DNMBP	0.641192	-0.641173	4.35489e-07	5.89333e-06
IQUB	0.466779	-1.09919	4.39415e-07	5.94253e-06
SNHG12	1.44635	0.532414	4.41435e-07	5.96592e-06
CCDC58	1.40806	0.493711	4.43288e-07	5.98702e-06
CDC42EP1	1.66949	0.739407	4.44338e-07	5.99725e-06
E2F5	0.492898	-1.02064	4.45273e-07	6.00592e-06
BCL7B	1.29007	0.367454	4.46284e-07	6.01559e-06
SMARCA5	0.750835	-0.413432	4.46765e-07	6.01812e-06
USH1C	0.208799	-2.25981	4.47197e-07	6.01999e-06
HYOU1	0.673847	-0.569507	4.50146e-07	6.05456e-06
MYEF2	0.29498	-1.76131	4.50356e-07	6.05456e-06
MTMR3	0.74605	-0.422656	4.52912e-07	6.08493e-06
MITF	0.537971	-0.8944	4.53978e-07	6.09525e-06
LRRC6	0.389797	-1.3592	4.55094e-07	6.10624e-06
IFI35	1.75829	0.814174	4.55801e-07	6.11173e-06
PACSIN2	0.624319	-0.679645	4.56573e-07	6.11571e-06
ZNF124	0.591618	-0.757262	4.56694e-07	6.11571e-06
GAS2L3	0.407919	-1.29364	4.60777e-07	6.16356e-06
ZNF774	0.62042	-0.688684	4.60869e-07	6.16356e-06
C9orf46	1.50602	0.590737	4.68428e-07	6.26057e-06
SYNRG	0.763026	-0.390195	4.74158e-07	6.33302e-06
C6orf124	0.545659	-0.873928	4.79243e-07	6.39677e-06
THBD	2.90478	1.53843	4.80403e-07	6.40808e-06
RNF170	0.761572	-0.392948	4.80995e-07	6.41181e-06
BBS10	0.742623	-0.429297	4.85984e-07	6.4741e-06
MCM7	1.35355	0.436752	4.86649e-07	6.47875e-06
ZFP62	0.757434	-0.400807	4.87645e-07	6.48779e-06
WHSC1L1	0.728342	-0.457312	4.89295e-07	6.50552e-06
LDB2	0.551665	-0.858137	4.89912e-07	6.50951e-06
CEP135	0.685111	-0.545591	4.90654e-07	6.51515e-06
TM4SF1	2.17839	1.12327	4.9163e-07	6.52389e-06
ERGIC1	0.660029	-0.599398	4.95323e-07	6.56864e-06
TPR	0.787356	-0.344911	5.03789e-07	6.67659e-06
ZBTB41	0.750964	-0.413184	5.04991e-07	6.68819e-06
AGGF1	0.802013	-0.318302	5.07553e-07	6.71779e-06
ZFP2	0.573584	-0.801922	5.08637e-07	6.7278e-06
NACA	1.31143	0.391138	5.10192e-07	6.74401e-06
TRIM52	0.673167	-0.570965	5.10528e-07	6.74411e-06
ATP6V1E1	1.24604	0.317346	5.10915e-07	6.74487e-06
LY6E	1.80459	0.851669	5.13573e-07	6.77559e-06
SPTBN1	0.715789	-0.482394	5.14646e-07	6.78538e-06
KIAA0319L	0.771479	-0.3743	5.1772e-07	6.82153e-06
FAM155A	0.439863	-1.18487	5.19064e-07	6.83484e-06
KBTBD10	0.557689	-0.842467	5.23387e-07	6.88734e-06
NBPF16	0.418421	-1.25697	5.25258e-07	6.90752e-06
KIAA0182	0.669673	-0.578471	5.25788e-07	6.91007e-06
RBBP4	0.704195	-0.505953	5.27399e-07	6.92294e-06
DOPEY1	0.725358	-0.463235	5.27685e-07	6.92294e-06
UBE2J2	1.2412	0.311739	5.2778e-07	6.92294e-06
KRT6A	8.12359	3.02212	5.33761e-07	6.99691e-06
TM9SF4	0.781535	-0.355617	5.34153e-07	6.99757e-06
RNF103	0.7338	-0.446542	5.34999e-07	7.00418e-06
DACH1	0.303739	-1.7191	5.38402e-07	7.04423e-06
AMBRA1	0.79361	-0.333498	5.40148e-07	7.06257e-06
MSI1	0.26335	-1.92495	5.40926e-07	7.06824e-06
BCL7C	1.47807	0.563715	5.42785e-07	7.08593e-06
PCNX	0.762509	-0.391173	5.42971e-07	7.08593e-06
SNRNP200	0.793789	-0.333173	5.43554e-07	7.08903e-06
ZNF641	0.579061	-0.788212	5.4562e-07	7.11144e-06
IARS2	0.772968	-0.37152	5.47493e-07	7.13133e-06
BBS2	0.705027	-0.504249	5.48511e-07	7.14005e-06
AGAP5	0.656329	-0.60751	5.48934e-07	7.14101e-06
MRPL55	1.41072	0.496427	5.49359e-07	7.14202e-06
RGS14	1.5989	0.677082	5.5218e-07	7.17414e-06
FAM158A	1.48988	0.5752	5.5574e-07	7.21582e-06
S100A8	7.3474	2.87723	5.58705e-07	7.24907e-06
TWF2	1.34811	0.430938	5.59008e-07	7.24907e-06
TRAK2	0.649295	-0.623055	5.59464e-07	7.2504e-06
SLC10A3	1.3654	0.449319	5.59871e-07	7.25109e-06
DDX46	0.808188	-0.307238	5.6193e-07	7.27316e-06
C1orf130	0.295738	-1.75761	5.65254e-07	7.31157e-06
GOLIM4	0.448011	-1.15839	5.67777e-07	7.33957e-06
C7orf59	1.46937	0.555196	5.69547e-07	7.35781e-06
SLC5A4	0.70755	-0.499096	5.7372e-07	7.40705e-06
ZRANB1	0.792703	-0.335148	5.80875e-07	7.49471e-06
PLA2G12A	0.772151	-0.373046	5.82267e-07	7.50794e-06
LOC613037	0.402828	-1.31176	5.83199e-07	7.51086e-06
SEMA3G	0.528551	-0.919886	5.83225e-07	7.51086e-06
B3GNT2	0.700235	-0.514089	5.87939e-07	7.5668e-06
SLC6A4	0.449851	-1.15248	5.92257e-07	7.61405e-06
FRG1	1.35527	0.438578	5.92353e-07	7.61405e-06
ANKIB1	0.761152	-0.393744	5.93328e-07	7.62181e-06
POLR3A	0.725741	-0.462472	5.97452e-07	7.66998e-06
ATP8A1	0.49851	-1.0043	6.00999e-07	7.71068e-06
SNORD116-20	0.559811	-0.836988	6.01901e-07	7.71743e-06
DCAF5	0.767838	-0.381126	6.0252e-07	7.72055e-06
DCAF8	0.803661	-0.31534	6.05357e-07	7.75204e-06
FSCN1	2.45336	1.29476	6.06167e-07	7.75636e-06
TRMT1	1.40083	0.486278	6.0645e-07	7.75636e-06
ROR1	0.422762	-1.24208	6.10164e-07	7.79899e-06
LIMS1	0.548519	-0.866385	6.1142e-07	7.81018e-06
CD3D	2.42825	1.27991	6.12541e-07	7.81515e-06
FMN1	0.435673	-1.19868	6.12572e-07	7.81515e-06
DLG4	0.530458	-0.91469	6.22309e-07	7.93444e-06
ZNF225	0.650442	-0.620507	6.22772e-07	7.93541e-06
CXCL10	3.75155	1.90748	6.25468e-07	7.96481e-06
BTBD9	0.700571	-0.513397	6.26709e-07	7.97565e-06
RTP4	2.28555	1.19254	6.27444e-07	7.98006e-06
MAX	1.25125	0.32337	6.2931e-07	7.99883e-06
MSL1	0.799608	-0.322636	6.30897e-07	8.01403e-06
ZNF785	0.687281	-0.541029	6.34776e-07	8.05825e-06
RAB15	0.533511	-0.906411	6.35164e-07	8.05825e-06
AASDH	0.747533	-0.41979	6.37438e-07	8.0821e-06
H3F3B	1.34892	0.431802	6.43356e-07	8.15125e-06
PLS1	0.449746	-1.15282	6.43687e-07	8.15125e-06
NSD1	0.743332	-0.42792	6.45225e-07	8.16568e-06
SPTY2D1	0.779997	-0.35846	6.48399e-07	8.20043e-06
ZNF844	0.374787	-1.41586	6.48771e-07	8.20043e-06
SLC35A3	0.629225	-0.668352	6.51893e-07	8.23482e-06
SNORD116-28	0.4571	-1.12942	6.53488e-07	8.24988e-06
SLC39A3	1.37305	0.457386	6.54146e-07	8.25311e-06
DHX40	0.724853	-0.464239	6.56949e-07	8.28338e-06
FARP1	0.500034	-0.999903	6.59209e-07	8.30088e-06
NCRNA00116	1.71486	0.778088	6.59509e-07	8.30088e-06
TNFAIP8L2	1.999	0.99928	6.59552e-07	8.30088e-06
SS18L1	0.732546	-0.449009	6.61702e-07	8.32283e-06
RPS6KA3	0.704276	-0.505788	6.63465e-07	8.33989e-06
ASNA1	1.30571	0.384834	6.66441e-07	8.37216e-06
RAB23	0.69203	-0.531094	6.69034e-07	8.39959e-06
GPM6B	0.52213	-0.93752	6.70549e-07	8.41346e-06
PPM1L	0.462357	-1.11292	6.72312e-07	8.43042e-06
ZNF136	0.638709	-0.646769	6.73449e-07	8.43952e-06
SEC24B	0.760076	-0.395785	6.75521e-07	8.46031e-06
TNS1	0.567206	-0.818055	6.78046e-07	8.48675e-06
PCDHGA9	0.430464	-1.21603	6.82594e-07	8.53847e-06
FPGS	1.37968	0.464332	6.84241e-07	8.55385e-06
HAUS8	1.43059	0.516614	6.87068e-07	8.57723e-06
ZNF594	0.608642	-0.716334	6.87254e-07	8.57723e-06
FOSL1	2.49712	1.32027	6.87367e-07	8.57723e-06
CDK9	1.25756	0.330631	6.8836e-07	8.58441e-06
RGS20	2.74574	1.45719	6.90468e-07	8.60546e-06
YARS	1.29673	0.374876	6.94465e-07	8.65001e-06
KLHDC7A	0.231529	-2.11073	6.95574e-07	8.65856e-06
ZRANB3	0.648865	-0.62401	6.98499e-07	8.6897e-06
NTAN1	1.31008	0.389655	7.00638e-07	8.71102e-06
MATR3	0.834708	-0.260657	7.03404e-07	8.73931e-06
MRPL17	1.33132	0.412862	7.03766e-07	8.73931e-06
SLC22A5	0.664458	-0.589749	7.04545e-07	8.74369e-06
RPF1	1.26056	0.33406	7.06845e-07	8.76693e-06
CARD16	1.8897	0.918159	7.14329e-07	8.85439e-06
FAM13B	0.718275	-0.477391	7.19593e-07	8.91426e-06
SIAE	0.581505	-0.782136	7.20413e-07	8.91902e-06
GIPC1	1.41326	0.499027	7.21251e-07	8.92402e-06
HECTD2	0.614751	-0.701926	7.2181e-07	8.92555e-06
TMEM170A	0.763757	-0.388815	7.23775e-07	8.94444e-06
EDEM3	0.686835	-0.541964	7.24846e-07	8.95228e-06
SP2	0.803541	-0.315556	7.25691e-07	8.95732e-06
LDOC1L	0.631492	-0.663163	7.28646e-07	8.98839e-06
OIP5	1.37954	0.464192	7.30685e-07	9.00813e-06
EBNA1BP2	1.32488	0.405859	7.35659e-07	9.06202e-06
RPLP1	1.48595	0.57139	7.35941e-07	9.06202e-06
NPR2	0.457211	-1.12907	7.45737e-07	9.17713e-06
PSMC1	1.37265	0.456969	7.51003e-07	9.23639e-06
BOLA2	1.39254	0.477721	7.52513e-07	9.24315e-06
HIST1H1B	1.84731	0.885429	7.52654e-07	9.24315e-06
C7orf11	1.29406	0.371899	7.52905e-07	9.24315e-06
KIAA0406	0.775915	-0.36603	7.53418e-07	9.24391e-06
SLAIN1	0.363711	-1.45914	7.57694e-07	9.29081e-06
PHF20L1	0.763385	-0.389517	7.58733e-07	9.29316e-06
B3GALT6	1.38937	0.474433	7.59035e-07	9.29316e-06
PKNOX2	0.394202	-1.34299	7.59245e-07	9.29316e-06
LOC729020	0.655339	-0.609686	7.61909e-07	9.31586e-06
NCOA3	0.714976	-0.484033	7.62008e-07	9.31586e-06
TBCB	1.41275	0.498506	7.63581e-07	9.32953e-06
C11orf73	1.38502	0.469908	7.64826e-07	9.33462e-06
ABL1	0.757484	-0.400713	7.64909e-07	9.33462e-06
NBPF3	0.527922	-0.921604	7.66511e-07	9.34861e-06
ZNF394	1.24329	0.314167	7.68649e-07	9.36911e-06
PTPRD	0.315783	-1.663	7.69391e-07	9.37258e-06
CHIC2	1.32363	0.404503	7.77219e-07	9.46232e-06
LAMP3	2.23216	1.15844	7.786e-07	9.47351e-06
ALDH16A1	1.37181	0.456082	7.80251e-07	9.48796e-06
ZNF37A	0.729075	-0.455861	7.82623e-07	9.51011e-06
NR1H2	1.27279	0.348	7.83011e-07	9.51011e-06
ZNF500	0.750823	-0.413456	7.83702e-07	9.51011e-06
FXYD3	2.32348	1.21629	7.83927e-07	9.51011e-06
KLHL15	0.752139	-0.410929	7.84673e-07	9.51353e-06
PPFIA1	0.741928	-0.430649	7.87884e-07	9.5468e-06
BLOC1S2	1.36608	0.450044	7.90385e-07	9.57145e-06
GPR125	0.543103	-0.880702	7.93105e-07	9.59873e-06
COL14A1	0.372857	-1.42331	7.96502e-07	9.63415e-06
TREM2	2.44798	1.29159	7.99914e-07	9.66971e-06
DISP1	0.622709	-0.68337	8.01529e-07	9.68353e-06
HOMER1	0.588878	-0.76396	8.0213e-07	9.68508e-06
SGPL1	0.779751	-0.358915	8.02909e-07	9.68879e-06
ZNF583	0.4652	-1.10408	8.037e-07	9.68901e-06
ZNF98	0.59894	-0.739516	8.03873e-07	9.68901e-06
PLSCR1	1.62439	0.699902	8.07354e-07	9.72525e-06
RPL28	1.5025	0.587367	8.10199e-07	9.75379e-06
TRAPPC1	1.32736	0.408555	8.14882e-07	9.8044e-06
RGP1	0.549927	-0.862687	8.15761e-07	9.80923e-06
C4orf31	0.366393	-1.44854	8.24899e-07	9.9133e-06
SLC1A7	0.460983	-1.11721	8.26895e-07	9.93145e-06
TMEM128	0.750441	-0.414189	8.30819e-07	9.97274e-06
RPS29	1.40743	0.49306	8.39951e-07	1.00732e-05
HIST2H2AC	1.70157	0.766866	8.40174e-07	1.00732e-05
IMPG1	0.599418	-0.738365	8.43575e-07	1.01081e-05
PSMA5	1.2848	0.361545	8.45183e-07	1.01215e-05
SEC23A	0.723498	-0.466939	8.46695e-07	1.01337e-05
RNF219	0.773342	-0.370822	8.47734e-07	1.01402e-05
RPA2	1.37631	0.460807	8.59428e-07	1.02714e-05
NR5A2	0.509828	-0.971918	8.59705e-07	1.02714e-05
SLC5A3	0.700615	-0.513306	8.61037e-07	1.02813e-05
MRPL41	1.51568	0.599965	8.63491e-07	1.03046e-05
TTC8	0.705218	-0.503859	8.66493e-07	1.03344e-05
NDUFS7	1.44717	0.533237	8.77296e-07	1.04572e-05
ZNF182	0.73752	-0.439246	8.78559e-07	1.04661e-05
FAU	1.37016	0.454345	8.80989e-07	1.0489e-05
FBXW8	0.774298	-0.369039	8.89755e-07	1.05872e-05
PDGFC	0.445899	-1.16521	8.94056e-07	1.06322e-05
USP44	0.381958	-1.38851	8.99366e-07	1.06892e-05
CCDC13	0.54816	-0.867331	9.01357e-07	1.07066e-05
NDUFA13	1.4217	0.507613	9.02433e-07	1.07132e-05
C12orf44	1.30495	0.383996	9.06633e-07	1.07568e-05
GTF2I	0.603636	-0.728248	9.09829e-07	1.07885e-05
UGDH	0.57208	-0.805712	9.11189e-07	1.07951e-05
C9orf5	0.768947	-0.379044	9.11438e-07	1.07951e-05
DDX58	1.67029	0.740096	9.16778e-07	1.08465e-05
EYS	0.619502	-0.69082	9.16835e-07	1.08465e-05
BRSK1	0.422312	-1.24362	9.20345e-07	1.08817e-05
AKAP10	0.643847	-0.635211	9.22132e-07	1.08931e-05
JRKL	0.679972	-0.556452	9.22371e-07	1.08931e-05
AFTPH	0.799356	-0.323091	9.24341e-07	1.09101e-05
ASB2	2.47808	1.30923	9.25763e-07	1.09206e-05
LOC400927	0.60639	-0.721682	9.27496e-07	1.09331e-05
ST6GALNAC3	0.539816	-0.88946	9.27892e-07	1.09331e-05
USMG5	1.42837	0.514368	9.29673e-07	1.09478e-05
LRRC4C	0.376494	-1.4093	9.30825e-07	1.09551e-05
PXK	0.57836	-0.78996	9.32226e-07	1.09653e-05
ARPC5	1.24173	0.312352	9.44831e-07	1.11072e-05
ATAD5	0.683015	-0.550011	9.55423e-07	1.12253e-05
C16orf42	1.33236	0.413986	9.58172e-07	1.12511e-05
PSTK	1.42864	0.514644	9.69964e-07	1.13831e-05
LARS2	0.72755	-0.458881	9.72146e-07	1.14021e-05
UGGT1	0.786666	-0.346177	9.7502e-07	1.14293e-05
ARHGAP6	0.471759	-1.08388	9.80424e-07	1.14861e-05
ZNF646	0.793075	-0.33447	9.82506e-07	1.15039e-05
CREB1	0.814474	-0.29606	9.86602e-07	1.15453e-05
TUG1	0.784923	-0.349377	9.96647e-07	1.16494e-05
MRPL2	1.31059	0.390215	9.9686e-07	1.16494e-05
GNGT2	1.83292	0.874143	9.97208e-07	1.16494e-05
CBR1	1.57748	0.657617	9.99997e-07	1.16754e-05
GAL3ST1	0.329931	-1.59976	1.00181e-06	1.16899e-05
PDE5A	0.524229	-0.931732	1.00241e-06	1.16902e-05
AKAP2	0.301312	-1.73067	1.00468e-06	1.171e-05
SERTAD1	1.47431	0.560039	1.01331e-06	1.18039e-05
ACAA2	0.512291	-0.964965	1.01751e-06	1.18437e-05
JHDM1D	0.635657	-0.65368	1.01788e-06	1.18437e-05
NCRNA00171	0.69162	-0.531948	1.02118e-06	1.18754e-05
CIDEB	1.50437	0.589158	1.02638e-06	1.1929e-05
C1orf86	1.40462	0.490181	1.02901e-06	1.19529e-05
KRT222	0.665524	-0.587437	1.03302e-06	1.19926e-05
RPL38	1.50271	0.587571	1.03434e-06	1.20011e-05
WIPF2	0.716487	-0.480987	1.03863e-06	1.20442e-05
ABI3	1.80106	0.848846	1.04031e-06	1.20568e-05
AHI1	0.687303	-0.540981	1.04215e-06	1.20713e-05
C1QA	2.38047	1.25125	1.04749e-06	1.21263e-05
TNFSF12-TNFSF13	3.07457	1.62038	1.04914e-06	1.21385e-05
TMEM150C	0.409641	-1.28757	1.05584e-06	1.22091e-05
STT3A	0.739178	-0.436006	1.05893e-06	1.2234e-05
DDX42	0.844834	-0.243261	1.05918e-06	1.2234e-05
FAM96B	1.34414	0.42668	1.06796e-06	1.23285e-05
ISY1	1.26226	0.336011	1.07322e-06	1.23822e-05
PRMT10	0.777926	-0.362296	1.07577e-06	1.24046e-05
DNLZ	1.55496	0.636874	1.08001e-06	1.24465e-05
MDM4	0.744803	-0.425068	1.09426e-06	1.26036e-05
ZNF727	0.631347	-0.663496	1.09804e-06	1.264e-05
KIAA0664P3	0.631205	-0.663821	1.10116e-06	1.26689e-05
LOC283922	0.601623	-0.733069	1.105e-06	1.27059e-05
BANF1	1.34586	0.428524	1.11722e-06	1.28393e-05
KIAA0564	0.705939	-0.502385	1.12041e-06	1.28687e-05
ABCA6	0.496487	-1.01017	1.12354e-06	1.28959e-05
SGK2	0.35894	-1.47819	1.12433e-06	1.28959e-05
XYLB	0.593221	-0.753357	1.12466e-06	1.28959e-05
XIST	0.356577	-1.48771	1.12533e-06	1.28964e-05
TTC31	0.803773	-0.315141	1.1301e-06	1.29413e-05
PKP1	7.07101	2.82192	1.13052e-06	1.29413e-05
CDC27	0.808627	-0.306454	1.13569e-06	1.29933e-05
INO80D	0.742559	-0.429423	1.14216e-06	1.306e-05
GBP2	1.86296	0.897597	1.14986e-06	1.31407e-05
ZNF121	0.660309	-0.598787	1.15338e-06	1.31736e-05
HIC2	0.63823	-0.647851	1.15417e-06	1.31752e-05
C6orf125	1.39181	0.476963	1.15734e-06	1.32042e-05
ZNF487	0.621195	-0.686881	1.15855e-06	1.3205e-05
MEF2B	1.70839	0.772637	1.15906e-06	1.3205e-05
C17orf106	1.42835	0.514353	1.15935e-06	1.3205e-05
C10orf108	0.340234	-1.5554	1.16219e-06	1.32299e-05
MAN2A1	0.536969	-0.897089	1.16878e-06	1.32976e-05
NUDT5	1.27318	0.348435	1.17281e-06	1.33361e-05
TPH1	0.569015	-0.81346	1.17555e-06	1.33598e-05
ZBTB34	0.755806	-0.403912	1.17829e-06	1.33835e-05
RAD50	0.744788	-0.425098	1.18773e-06	1.34833e-05
MBTPS2	0.736082	-0.442061	1.18845e-06	1.3484e-05
MYO18A	0.629712	-0.667236	1.18999e-06	1.3494e-05
PVRL3	0.361602	-1.46752	1.19136e-06	1.35021e-05
LOC285419	0.495625	-1.01268	1.193e-06	1.35132e-05
ARHGEF17	0.649108	-0.623469	1.19927e-06	1.35767e-05
BAG5	0.80729	-0.308842	1.20228e-06	1.36032e-05
ZDHHC2	0.408559	-1.29138	1.20526e-06	1.3623e-05
DUSP18	0.70372	-0.506926	1.20535e-06	1.3623e-05
MRPL22	1.32318	0.404004	1.21315e-06	1.37036e-05
C11orf83	1.4404	0.52647	1.23672e-06	1.39621e-05
SLC31A1	0.717979	-0.477986	1.24016e-06	1.39933e-05
CCDC47	0.766328	-0.383967	1.24286e-06	1.4016e-05
NR2F1	0.404546	-1.30563	1.24526e-06	1.40353e-05
SNTB1	0.464052	-1.10764	1.25323e-06	1.41174e-05
STX4	1.28592	0.362796	1.25436e-06	1.41224e-05
MED13L	0.721026	-0.471878	1.257e-06	1.41443e-05
TMEM171	2.36339	1.24086	1.26022e-06	1.41728e-05
NAPRT1	1.67628	0.745266	1.26487e-06	1.42057e-05
MON2	0.792945	-0.334708	1.26521e-06	1.42057e-05
TXNL4A	1.34408	0.426614	1.26522e-06	1.42057e-05
ALDH5A1	0.610815	-0.711193	1.26963e-06	1.42474e-05
ACLY	0.732773	-0.448561	1.28527e-06	1.4415e-05
AVEN	1.42052	0.506417	1.29372e-06	1.45018e-05
ITGA10	0.492972	-1.02042	1.29506e-06	1.45089e-05
TMPPE	0.651975	-0.617111	1.29665e-06	1.45188e-05
LOC253724	0.696295	-0.52223	1.30521e-06	1.45967e-05
SARM1	0.534718	-0.903151	1.30559e-06	1.45967e-05
SNRPD3	1.28877	0.36599	1.30574e-06	1.45967e-05
FANCF	0.645323	-0.631906	1.30748e-06	1.46081e-05
DIS3L	0.759625	-0.39664	1.3122e-06	1.46529e-05
UBE2B	1.2751	0.350616	1.32015e-06	1.47337e-05
ACVR2B	0.648545	-0.624722	1.32705e-06	1.48026e-05
POMP	1.33944	0.421634	1.33862e-06	1.49235e-05
ARMCX3	0.573591	-0.801907	1.34285e-06	1.49625e-05
GSTO1	1.48498	0.57044	1.34986e-06	1.50292e-05
DDAH1	0.411533	-1.28092	1.35029e-06	1.50292e-05
ZNF701	0.514514	-0.958716	1.3532e-06	1.50533e-05
ZNF737	0.425227	-1.23369	1.35393e-06	1.50533e-05
GSTP1	1.5936	0.672286	1.35616e-06	1.50699e-05
FAM171B	0.468534	-1.09378	1.36182e-06	1.51246e-05
GSDMC	3.65571	1.87015	1.3678e-06	1.51828e-05
PCGF3	0.738257	-0.437805	1.36883e-06	1.5186e-05
RWDD2A	0.694363	-0.526237	1.37083e-06	1.51916e-05
TMEM51	1.43917	0.525237	1.37153e-06	1.51916e-05
PSMB1	1.31331	0.393209	1.37156e-06	1.51916e-05
OVCA2	1.33817	0.420263	1.38333e-06	1.53055e-05
ZNF827	0.461794	-1.11468	1.38333e-06	1.53055e-05
ESRRG	0.31416	-1.67043	1.38541e-06	1.53202e-05
C5orf42	0.628423	-0.670192	1.39411e-06	1.54082e-05
FAM161A	0.626675	-0.674211	1.40518e-06	1.55221e-05
ZNF354B	0.707397	-0.499409	1.40705e-06	1.55343e-05
RGPD6	0.648243	-0.625392	1.40957e-06	1.55538e-05
CLPP	1.3437	0.426207	1.41587e-06	1.56087e-05
PPP1R13L	1.7039	0.768843	1.41607e-06	1.56087e-05
PSMB8	1.65368	0.725676	1.42104e-06	1.56551e-05
COG5	0.778138	-0.361901	1.42382e-06	1.56773e-05
CA8	0.244208	-2.03382	1.43098e-06	1.57373e-05
PLAA	1.25082	0.322877	1.43125e-06	1.57373e-05
ASXL3	0.426779	-1.22844	1.43157e-06	1.57373e-05
RSAD2	2.48967	1.31596	1.44034e-06	1.58253e-05
HBEGF	2.07462	1.05285	1.44291e-06	1.5845e-05
MTDH	0.798348	-0.324911	1.45369e-06	1.59548e-05
COG3	0.736681	-0.440887	1.45453e-06	1.59555e-05
SHISA5	1.41145	0.497177	1.4567e-06	1.59707e-05
PRUNE2	0.454919	-1.13632	1.46264e-06	1.60199e-05
PLXNC1	0.379196	-1.39898	1.46275e-06	1.60199e-05
PCMTD1	0.740791	-0.432862	1.46917e-06	1.60817e-05
SESTD1	0.64988	-0.621754	1.47782e-06	1.61677e-05
PPP2R1B	0.719789	-0.474354	1.48025e-06	1.61856e-05
TUBGCP4	0.721311	-0.471307	1.48558e-06	1.62353e-05
ZNRF3	0.630841	-0.664651	1.49309e-06	1.63086e-05
KARS	1.26357	0.337507	1.49571e-06	1.63211e-05
TNFRSF1A	1.39427	0.47951	1.49582e-06	1.63211e-05
FCER1G	1.97904	0.984804	1.5009e-06	1.63678e-05
BCL3	1.53983	0.622771	1.50177e-06	1.63686e-05
TRPM7	0.75195	-0.411292	1.50935e-06	1.64395e-05
RPGRIP1L	0.673147	-0.571007	1.51041e-06	1.64395e-05
FKBP8	1.24378	0.314729	1.51069e-06	1.64395e-05
GIYD2	1.5159	0.600173	1.51231e-06	1.64485e-05
C21orf70	1.45916	0.545142	1.51872e-06	1.65095e-05
MXD3	1.47725	0.562918	1.51978e-06	1.65122e-05
RALGPS1	0.570715	-0.809159	1.5219e-06	1.65135e-05
LPAR4	0.663742	-0.591305	1.5222e-06	1.65135e-05
MOV10	1.28462	0.361341	1.52232e-06	1.65135e-05
ZNF649	0.523959	-0.932475	1.54054e-06	1.66953e-05
RASSF8	0.499024	-1.00282	1.54109e-06	1.66953e-05
GPC1	1.82368	0.86685	1.54151e-06	1.66953e-05
LMBRD1	0.774045	-0.36951	1.54294e-06	1.67019e-05
TMEM40	4.13188	2.0468	1.5549e-06	1.68225e-05
MRPS11	1.32052	0.401102	1.5565e-06	1.68309e-05
CTPS2	0.691278	-0.532663	1.56148e-06	1.68687e-05
PQBP1	1.3604	0.444032	1.56165e-06	1.68687e-05
CXorf23	0.748931	-0.417095	1.57184e-06	1.69699e-05
KSR2	0.3575	-1.48399	1.57862e-06	1.70341e-05
PHACTR2	0.680425	-0.555491	1.58079e-06	1.70485e-05
GSTCD	0.715377	-0.483224	1.59253e-06	1.71574e-05
PPARG	0.373694	-1.42007	1.59255e-06	1.71574e-05
ARPC2	1.37246	0.456762	1.60249e-06	1.72554e-05
EPC2	0.775423	-0.366944	1.61338e-06	1.73635e-05
NEK1	0.713477	-0.487061	1.6145e-06	1.73664e-05
NCRNA00204B	1.59846	0.676681	1.61734e-06	1.73878e-05
ITFG1	0.757155	-0.401339	1.61896e-06	1.73961e-05
NINJ1	1.55735	0.639096	1.62019e-06	1.74003e-05
APOBEC3A	3.15591	1.65805	1.62344e-06	1.74261e-05
C1orf168	0.341993	-1.54796	1.62688e-06	1.74539e-05
ZNF107	0.634298	-0.656767	1.63498e-06	1.75316e-05
YIPF6	0.71677	-0.480418	1.63613e-06	1.75347e-05
CEP250	0.69492	-0.525081	1.6474e-06	1.76433e-05
ESPNP	0.465892	-1.10193	1.6495e-06	1.76433e-05
C6orf114	1.85442	0.890966	1.64961e-06	1.76433e-05
ATF7	0.798365	-0.32488	1.6497e-06	1.76433e-05
ANXA8L2	4.86946	2.28376	1.65065e-06	1.76439e-05
STAU2	0.752881	-0.409507	1.65148e-06	1.76439e-05
SLC2A11	0.617157	-0.696291	1.65876e-06	1.77124e-05
LRRC37B2	0.787761	-0.34417	1.66869e-06	1.78092e-05
UCHL3	1.38586	0.470777	1.66986e-06	1.78124e-05
GPR75	0.566313	-0.820328	1.67089e-06	1.78141e-05
SLC41A2	0.484921	-1.04418	1.68752e-06	1.79821e-05
ZFR	0.773062	-0.371345	1.68883e-06	1.79867e-05
GPX1	1.52147	0.605466	1.69003e-06	1.79901e-05
JUND	1.50305	0.587891	1.69201e-06	1.80019e-05
FAM125A	1.33559	0.417481	1.70621e-06	1.81435e-05
HEBP2	1.42467	0.510629	1.71144e-06	1.81897e-05
PEG10	0.186175	-2.42527	1.7141e-06	1.81994e-05
GATSL1	0.529886	-0.916245	1.71412e-06	1.81994e-05
RGS11	0.425789	-1.23179	1.71849e-06	1.82312e-05
METTL11A	1.38982	0.474896	1.71891e-06	1.82312e-05
WIBG	1.23959	0.309861	1.73075e-06	1.83474e-05
DAB1	0.570861	-0.808788	1.73576e-06	1.8391e-05
GAS2	0.441773	-1.17862	1.73853e-06	1.84109e-05
TXNDC5	0.710928	-0.492225	1.74106e-06	1.84281e-05
LOC202181	0.576514	-0.794572	1.74392e-06	1.84489e-05
MFAP3	0.788658	-0.342528	1.74948e-06	1.84981e-05
FAM159A	2.02485	1.01781	1.75208e-06	1.85161e-05
TACSTD2	2.02279	1.01634	1.75647e-06	1.85528e-05
ZNF853	0.440873	-1.18156	1.75938e-06	1.85741e-05
TP53TG1	1.60437	0.682003	1.76309e-06	1.86037e-05
PSMD13	1.27461	0.350056	1.76504e-06	1.86147e-05
AP3M1	0.823093	-0.280873	1.77042e-06	1.86618e-05
LAMB1	0.554459	-0.850848	1.7794e-06	1.87468e-05
AMOT	0.294055	-1.76584	1.78059e-06	1.87497e-05
NCOA1	0.756173	-0.403211	1.79045e-06	1.88438e-05
CMTM1	0.645917	-0.630578	1.79788e-06	1.89123e-05
SYTL2	0.50701	-0.979915	1.8005e-06	1.89302e-05
CELF3	0.553507	-0.853326	1.80179e-06	1.8934e-05
KRT6B	6.5686	2.71559	1.80339e-06	1.89411e-05
RBMX2	1.31077	0.390417	1.82072e-06	1.91134e-05
SNRNP48	0.761057	-0.393923	1.82749e-06	1.91719e-05
ZBTB38	0.61098	-0.710802	1.82817e-06	1.91719e-05
MTMR12	0.686703	-0.542242	1.83898e-06	1.92755e-05
CSRNP2	0.774399	-0.36885	1.84084e-06	1.92851e-05
SDHB	1.25034	0.322325	1.84227e-06	1.92902e-05
TRIM56	0.575224	-0.797805	1.84773e-06	1.93374e-05
PARP10	1.45308	0.539112	1.8538e-06	1.93911e-05
CCDC163P	0.550603	-0.860917	1.85623e-06	1.94062e-05
C20orf132	0.58115	-0.783017	1.85713e-06	1.94062e-05
PCDHGA6	0.513813	-0.960685	1.86968e-06	1.95273e-05
IER2	1.52557	0.609346	1.87185e-06	1.95307e-05
DLEC1	0.426099	-1.23074	1.8719e-06	1.95307e-05
RPS15A	1.38235	0.467123	1.87329e-06	1.95352e-05
EXTL2	0.635005	-0.65516	1.87516e-06	1.95448e-05
IVD	0.639992	-0.643874	1.87651e-06	1.95489e-05
ZBTB8OS	1.31059	0.390216	1.8803e-06	1.95691e-05
SMPD3	0.473439	-1.07875	1.88036e-06	1.95691e-05
GYG2	0.33779	-1.5658	1.88131e-06	1.95691e-05
ZCCHC24	0.614591	-0.7023	1.88341e-06	1.9581e-05
ANKRD19	1.62519	0.70061	1.88623e-06	1.96003e-05
RPL11	1.38445	0.469309	1.89228e-06	1.96441e-05
ARMC1	0.757893	-0.399934	1.89236e-06	1.96441e-05
PCDHB6	0.489239	-1.03139	1.91493e-06	1.98683e-05
PSMA6	1.31635	0.396545	1.94535e-06	2.01738e-05
S100A9	4.96898	2.31295	1.94671e-06	2.01777e-05
SDCCAG1	0.765729	-0.385095	1.96143e-06	2.032e-05
C8orf47	0.294331	-1.76449	1.96271e-06	2.03229e-05
CAPS2	0.542249	-0.882972	1.97221e-06	2.0411e-05
SLC25A13	0.732098	-0.449891	1.98028e-06	2.04778e-05
OTUD7B	0.780072	-0.358321	1.98165e-06	2.04778e-05
RUFY2	0.785991	-0.347415	1.98177e-06	2.04778e-05
MRPL9	1.224	0.291606	1.98266e-06	2.04778e-05
C9orf142	1.4221	0.508021	1.98928e-06	2.05346e-05
LOC729156	2.12776	1.08934	1.99114e-06	2.05346e-05
DGKD	0.645047	-0.632523	1.99116e-06	2.05346e-05
GADD45A	1.67734	0.746172	1.99341e-06	2.05475e-05
ZBED4	0.773492	-0.370541	2.00576e-06	2.06643e-05
ACTB	1.28479	0.361536	2.01522e-06	2.07514e-05
AKD1	0.609789	-0.713618	2.01844e-06	2.07741e-05
ZNF184	0.740776	-0.432891	2.02357e-06	2.08165e-05
C8orf83	0.675925	-0.565065	2.02591e-06	2.08301e-05
GAPDHS	0.688707	-0.538038	2.0518e-06	2.10857e-05
COL15A1	0.516211	-0.953967	2.07255e-06	2.12882e-05
LOC606724	1.86566	0.899688	2.07443e-06	2.1297e-05
LDLRAD1	0.443717	-1.17229	2.08512e-06	2.1396e-05
[truncated: 8,568 more rows]

## Sheet: CHOL
Table2. Differential expression genes related CDKN2A in TCGA-CHOL
id	fc	log2fc	pvalue	padj
CDKN2A	19.9852	4.32086	7.38795e-08	0.00151468
C9orf53	2.04366	1.03115	6.46677e-05	0.662909
CDKN2BAS	5.0576	2.33845	0.000310813	0.955732
MXRA7	0.288481	-1.79345	0.000511505	0.955732
BMI1	0.626257	-0.675173	0.000528145	0.955732
IMMP2L	1.67024	0.74006	0.00100397	0.955732
SCARA3	0.259126	-1.94827	0.00153639	0.955732
TMEM9B	0.659949	-0.599573	0.00154692	0.955732
C14orf37	0.333618	-1.58373	0.00155202	0.955732
LOC253724	1.81176	0.857393	0.00169211	0.955732
SCUBE3	0.187699	-2.41351	0.00169245	0.955732
SLC5A8	17.4549	4.12556	0.00175461	0.955732
AUTS2	0.3519	-1.50676	0.00175752	0.955732
TMCO3	0.475646	-1.07204	0.00183992	0.955732
SUN2	0.585048	-0.773373	0.0020236	0.955732
TSPAN12	3.34558	1.74226	0.00202831	0.955732
HIST1H3B	2.30531	1.20496	0.00205828	0.955732
ALK	0.372479	-1.42477	0.00211699	0.955732
CDYL	0.590408	-0.760215	0.00229668	0.955732
RAB11FIP5	0.560962	-0.834024	0.00252832	0.955732
UXS1	0.586387	-0.770075	0.00271655	0.955732
TMEM184B	0.619539	-0.690734	0.00275051	0.955732
OSBPL5	0.585652	-0.771883	0.00281932	0.955732
HHIPL1	0.379713	-1.39702	0.00289204	0.955732
HMGN3	2.08797	1.0621	0.00296109	0.955732
SERINC3	0.631671	-0.662756	0.0030201	0.955732
ADAMTS7	0.442458	-1.17639	0.0030806	0.955732
KCTD19	3.00054	1.58522	0.00311729	0.955732
PARP16	1.41208	0.49782	0.00328566	0.955732
CCDC160	2.86893	1.52051	0.00338634	0.955732
EXT2	0.589416	-0.762641	0.00346295	0.955732
CDK3	1.77511	0.827908	0.0034712	0.955732
CYB5R3	0.66875	-0.580461	0.0035131	0.955732
LEKR1	1.97777	0.983877	0.00371841	0.955732
GPC1	0.562535	-0.829986	0.00376569	0.955732
IVD	1.46927	0.555102	0.00379149	0.955732
C21orf58	2.25815	1.17514	0.00393792	0.955732
DCLK2	0.433792	-1.20493	0.00411258	0.955732
C8orf45	1.97902	0.984786	0.00413569	0.955732
PMS2	1.55815	0.639834	0.0042034	0.955732
GLB1	0.612416	-0.707416	0.00434783	0.955732
C4orf39	3.43931	1.78212	0.00444925	0.955732
FAM66D	3.86518	1.95053	0.00450874	0.955732
ZNF140	1.45971	0.54568	0.00456596	0.955732
HIST1H2AG	3.30161	1.72317	0.00460357	0.955732
SRRM5	2.57433	1.3642	0.00468087	0.955732
LOC642852	1.64371	0.716958	0.00473267	0.955732
PEBP4	0.561059	-0.833776	0.00475683	0.955732
TMEM199	1.38758	0.472566	0.00479033	0.955732
NFYB	1.57035	0.651091	0.0048148	0.955732
MTMR6	0.588865	-0.763992	0.00490617	0.955732
MICAL2	0.46755	-1.09681	0.00494385	0.955732
OR10AD1	1.51243	0.596866	0.00495682	0.955732
NUSAP1	2.29929	1.20119	0.00496843	0.955732
SMPD1	0.502899	-0.991659	0.00498022	0.955732
C3orf31	0.681327	-0.553581	0.00503064	0.955732
PHB2	1.45953	0.545507	0.00518774	0.955732
FOXJ1	9.00389	3.17055	0.00519528	0.955732
PRTN3	0.638372	-0.64753	0.00523967	0.955732
LDLR	0.513184	-0.962451	0.00529633	0.955732
ENO3	3.76213	1.91155	0.00539176	0.955732
ZSCAN10	1.44406	0.530135	0.00550394	0.955732
C14orf50	0.183741	-2.44426	0.00555164	0.955732
ACAD10	1.6951	0.761368	0.00560168	0.955732
DNAH12	3.02343	1.59619	0.00573086	0.955732
LIAS	1.60009	0.678156	0.00575404	0.955732
NIT2	1.77702	0.829456	0.00579862	0.955732
RNF152	0.505226	-0.984999	0.00584462	0.955732
HIST1H2AL	2.3867	1.25502	0.00604886	0.955732
NRXN3	0.335045	-1.57757	0.00608081	0.955732
DUSP7	0.490941	-1.02638	0.00613612	0.955732
EFCAB3	1.35189	0.434981	0.00635646	0.955732
PHLDA2	0.347247	-1.52596	0.00639633	0.955732
RANBP9	0.665711	-0.587032	0.00642044	0.955732
OR2B6	4.71373	2.23687	0.00645924	0.955732
UBE2E1	0.667308	-0.583574	0.00646623	0.955732
RSPH1	2.42243	1.27646	0.00651064	0.955732
NLK	1.50497	0.589737	0.00656687	0.955732
SRGAP1	2.15132	1.10522	0.00671736	0.955732
IFT81	1.71313	0.776637	0.00676437	0.955732
C9orf173	1.95992	0.970794	0.00681381	0.955732
MRM1	1.91337	0.936119	0.00693337	0.955732
MT1G	9.41683	3.23524	0.00697007	0.955732
TIGD7	1.76446	0.819225	0.00697095	0.955732
ZCRB1	1.31452	0.394533	0.00702334	0.955732
HIST1H3J	2.14432	1.10052	0.00703016	0.955732
SFRS13B	2.09459	1.06667	0.0070702	0.955732
SH3TC1	0.560902	-0.834178	0.00709694	0.955732
LOC400752	1.86062	0.895782	0.00718623	0.955732
IFT80	2.11509	1.08072	0.00732904	0.955732
MLEC	1.33123	0.412756	0.00735278	0.955732
DDX55	1.44786	0.533919	0.00737662	0.955732
PTPRA	0.687851	-0.539833	0.00758886	0.955732
OIP5	2.36993	1.24484	0.00761721	0.955732
HSPE1	1.57897	0.658981	0.00775624	0.955732
RSL24D1	1.40534	0.490921	0.00786613	0.955732
TEX9	1.92189	0.942528	0.00790738	0.955732
MAP4K4	0.549558	-0.863656	0.00791306	0.955732
WLS	0.333175	-1.58565	0.0079389	0.955732
MYADML2	2.9305	1.55115	0.00798214	0.955732
LRRC17	0.375772	-1.41207	0.00798831	0.955732
C9orf43	2.2427	1.16524	0.00806876	0.955732
LIPT2	1.89409	0.921502	0.00812576	0.955732
STX2	1.68925	0.75638	0.00817608	0.955732
FKBP4	1.56552	0.64664	0.00819939	0.955732
VGLL4	0.624281	-0.679732	0.00826902	0.955732
USP35	0.564023	-0.826174	0.00832613	0.955732
WDR24	1.37485	0.459278	0.00866411	0.955732
MOSPD1	0.696212	-0.522401	0.00867818	0.955732
NHEJ1	1.36758	0.451626	0.00917093	0.955732
MAP1B	0.419475	-1.25334	0.0092957	0.955732
SPATA5L1	1.42968	0.515695	0.00935761	0.955732
CGA	0.350338	-1.51318	0.00948346	0.955732
GPR45	0.52702	-0.924071	0.00951504	0.955732
TM9SF2	0.529372	-0.917647	0.00953392	0.955732
SFRS8	1.37421	0.458601	0.00954679	0.955732
FBLN7	0.359478	-1.47603	0.00956153	0.955732
TAC4	1.70553	0.770217	0.00959431	0.955732
PGCP	0.54708	-0.870176	0.00960709	0.955732
ZNF75A	1.87567	0.907409	0.00964726	0.955732
TMEM97	2.8395	1.50564	0.00982273	0.955732
NMNAT3	1.91157	0.934759	0.00982799	0.955732
SUB1	1.80608	0.852864	0.00986359	0.955732
C1orf97	1.69225	0.758939	0.00996321	0.955732
C11orf58	0.770316	-0.376478	0.0100378	0.955732
WDR89	1.45052	0.536567	0.0101109	0.955732
HIST2H3D	2.19625	1.13504	0.0102008	0.955732
IL17RC	0.696801	-0.521181	0.0102011	0.955732
MYH9	0.627742	-0.671757	0.0102851	0.955732
NAP1L6	0.272933	-1.87338	0.0103226	0.955732
MTMR2	0.725517	-0.46292	0.0104004	0.955732
ESR2	2.60177	1.3795	0.0104008	0.955732
PSME2	1.65694	0.728518	0.0105095	0.955732
C16orf79	2.19128	1.13177	0.0105611	0.955732
GSDMA	0.374466	-1.41709	0.0106009	0.955732
ADRB3	0.536019	-0.899644	0.0106531	0.955732
RAB9B	0.524372	-0.931337	0.0106812	0.955732
SCXB	2.62374	1.39163	0.0107225	0.955732
BIRC2	0.64255	-0.63812	0.0108397	0.955732
PIGT	0.707744	-0.498701	0.010899	0.955732
USP40	1.30458	0.383589	0.0109573	0.955732
VCX	0.57842	-0.789811	0.0109626	0.955732
PEA15	0.550868	-0.860221	0.0111597	0.955732
MAFA	0.410972	-1.28289	0.0112998	0.955732
ITFG1	0.693068	-0.528931	0.0113721	0.955732
AMAC1L3	1.47373	0.559473	0.0113789	0.955732
NPIPL3	1.91315	0.935948	0.0114546	0.955732
YJEFN3	2.66464	1.41394	0.0114782	0.955732
TMBIM1	0.648575	-0.624656	0.0115348	0.955732
IL17RA	0.611784	-0.708905	0.0117036	0.955732
SRP14	1.30537	0.384461	0.0117168	0.955732
REPIN1	1.55799	0.639682	0.0117477	0.955732
LOC92659	1.82845	0.870618	0.0118315	0.955732
C2orf34	1.70201	0.767242	0.0118839	0.955732
C11orf1	1.57268	0.653221	0.0119977	0.955732
TFAP4	1.54983	0.632108	0.012017	0.955732
KRTAP5-6	1.49899	0.583994	0.0120456	0.955732
NHEDC1	0.596805	-0.744668	0.0120987	0.955732
HEXIM2	2.00234	1.00169	0.0121118	0.955732
TAS2R4	1.89079	0.918992	0.0121155	0.955732
ANAPC5	1.31405	0.394019	0.0121402	0.955732
CPSF3L	1.34714	0.429896	0.0122817	0.955732
TBC1D3B	2.15366	1.10679	0.0123839	0.955732
DUSP27	0.482711	-1.05077	0.0124062	0.955732
U2AF1	1.57821	0.65829	0.0124272	0.955732
RPAP1	1.52762	0.611287	0.0124338	0.955732
GREB1L	0.29249	-1.77354	0.0126364	0.955732
FLJ45244	1.81997	0.863916	0.012643	0.955732
PLXNA2	0.409168	-1.28923	0.0127087	0.955732
OGG1	0.744938	-0.424808	0.0127598	0.955732
PRODH	3.70879	1.89095	0.0127802	0.955732
CSRNP1	0.463128	-1.11052	0.0128042	0.955732
MMGT1	0.703241	-0.50791	0.0128365	0.955732
KIF24	1.81199	0.857574	0.0129129	0.955732
LCA5L	2.01115	1.00802	0.0129217	0.955732
RAI2	0.312517	-1.67799	0.0130481	0.955732
UPK3BL	4.79396	2.26122	0.0130638	0.955732
SORCS2	0.220995	-2.17792	0.013117	0.955732
ADRBK2	0.526899	-0.924402	0.0132509	0.955732
STIM1	0.599546	-0.738059	0.0133047	0.955732
LOC400891	1.38124	0.465963	0.0133192	0.955732
ZNF174	1.20532	0.269417	0.0133223	0.955732
C10orf62	2.08192	1.05792	0.0134188	0.955732
PHKG2	1.60887	0.686052	0.0134937	0.955732
RTBDN	0.353682	-1.49947	0.0135012	0.955732
EFCAB10	1.87807	0.90925	0.0135204	0.955732
RPUSD2	1.41322	0.498986	0.0137429	0.955732
NEXN	0.391242	-1.35387	0.013854	0.955732
ANKRD24	2.17195	1.11899	0.01394	0.955732
LOC100129637	1.74759	0.805364	0.0139518	0.955732
LOC647859	0.337056	-1.56894	0.0139967	0.955732
CD82	0.477801	-1.06552	0.0140854	0.955732
UNG	1.50507	0.589832	0.0141188	0.955732
POU3F3	5.15944	2.36721	0.0141538	0.955732
RAD52	1.74509	0.803298	0.0142058	0.955732
MYO5A	0.468948	-1.0925	0.0142673	0.955732
ARHGAP1	0.725117	-0.463714	0.0143872	0.955732
BTBD10	0.644163	-0.634503	0.0145462	0.955732
PA2G4P4	1.42433	0.510283	0.0145553	0.955732
FLJ39653	1.65248	0.724633	0.0145827	0.955732
LINGO2	0.44097	-1.18125	0.0146115	0.955732
BEND7	0.603263	-0.729141	0.0146446	0.955732
HIST1H3C	1.99744	0.998154	0.0147012	0.955732
AHCY	1.53019	0.61371	0.0147576	0.955732
C11orf88	0.566852	-0.818956	0.0147916	0.955732
NDEL1	0.700176	-0.51421	0.0148391	0.955732
MMP14	0.614347	-0.702875	0.0149538	0.955732
METTL12	1.88433	0.914052	0.0149618	0.955732
DDX51	1.37162	0.455877	0.0149729	0.955732
TMPPE	0.475143	-1.07357	0.015036	0.955732
DKFZP434K028	1.799	0.847197	0.015075	0.955732
MORN5	2.70508	1.43567	0.0151904	0.955732
KIAA0087	4.67409	2.22468	0.0152296	0.955732
TBC1D10A	0.704633	-0.505056	0.0152831	0.955732
HNF1A	2.11879	1.08324	0.0153697	0.955732
SNORD97	0.762703	-0.390807	0.0154111	0.955732
CREM	0.721158	-0.471612	0.0154133	0.955732
KCNMB3	1.90138	0.927045	0.0155216	0.955732
C19orf71	1.99033	0.993008	0.0155812	0.955732
SGMS2	0.380173	-1.39527	0.0156118	0.955732
C10orf50	1.73556	0.795403	0.01565	0.955732
MBP	0.709122	-0.495893	0.0157328	0.955732
C17orf65	1.41893	0.504807	0.0157795	0.955732
LTB4R	2.14562	1.10139	0.0159572	0.955732
RHAG	1.85128	0.888521	0.0162076	0.955732
FOXP1	0.664027	-0.590687	0.0162093	0.955732
ATF6B	0.770248	-0.376604	0.0162565	0.955732
SNAI2	0.276966	-1.85222	0.0163672	0.955732
PLEKHA9	1.37008	0.45426	0.016374	0.955732
ABTB2	0.432257	-1.21004	0.0164262	0.955732
NOB1	1.43213	0.518162	0.0164398	0.955732
WDR5B	1.68894	0.756119	0.0164459	0.955732
WDR90	1.60265	0.680458	0.0164675	0.955732
EPHA2	0.458532	-1.12491	0.016473	0.955732
LOC645332	1.67387	0.743185	0.016527	0.955732
TOP2B	0.67087	-0.575894	0.0165909	0.955732
PUS1	1.61202	0.688866	0.0166684	0.955732
ECE1	0.5534	-0.853606	0.0168348	0.955732
TTC25	2.3454	1.22983	0.016845	0.955732
ATP2A1	3.16522	1.66231	0.0168843	0.955732
ERRFI1	0.411771	-1.28009	0.0169026	0.955732
RAB3B	0.202526	-2.30382	0.0171537	0.955732
CCBL2	0.688126	-0.539255	0.0172248	0.955732
HIST1H3I	1.51024	0.594778	0.017231	0.955732
TTLL10	2.72748	1.44757	0.0172517	0.955732
HLA-L	0.568806	-0.81399	0.01732	0.955732
CACNA1F	3.01491	1.59212	0.0173312	0.955732
KRTDAP	2.00304	1.00219	0.0173685	0.955732
TTLL6	6.72626	2.7498	0.0173886	0.955732
C5orf62	0.390328	-1.35724	0.0173947	0.955732
PCP2	2.18412	1.12705	0.0174983	0.955732
LTBP1	0.395844	-1.337	0.0175662	0.955732
SERPINF2	4.95391	2.30857	0.0176284	0.955732
RECQL5	1.43672	0.522777	0.0176606	0.955732
GRHL3	0.275038	-1.8623	0.017697	0.955732
LOC339047	1.41318	0.498945	0.0179089	0.955732
DDX11	1.72424	0.785957	0.0179129	0.955732
RNF31	1.31905	0.399498	0.0179413	0.955732
AZI2	0.679023	-0.558468	0.0179607	0.955732
OGFOD2	1.5765	0.656729	0.0179613	0.955732
DPH3	0.73816	-0.437994	0.0180846	0.955732
HIST1H2AM	3.49105	1.80366	0.0181729	0.955732
HKDC1	2.69323	1.42934	0.018422	0.955732
TPPP3	3.32663	1.73406	0.0184348	0.955732
ZACN	1.51928	0.603388	0.0184667	0.955732
DUSP16	1.59861	0.676822	0.0185228	0.955732
PRIMA1	0.325044	-1.62129	0.0186818	0.955732
POLDIP2	1.42544	0.511403	0.018778	0.955732
SLFN13	2.32256	1.21571	0.0188329	0.955732
CCNY	0.763309	-0.389661	0.0188816	0.955732
ABCG1	0.502433	-0.992998	0.0189135	0.955732
TMEM43	0.657627	-0.604658	0.0189561	0.955732
C14orf93	1.46626	0.552143	0.0189579	0.955732
RALB	0.719304	-0.475326	0.0190135	0.955732
MACF1	0.638772	-0.646626	0.0191969	0.955732
LOC728613	1.71257	0.77616	0.0192536	0.955732
TUT1	1.56518	0.646326	0.0192986	0.955732
SUDS3	1.3652	0.449117	0.019323	0.955732
SCAND3	4.4654	2.15879	0.019368	0.955732
ASCL1	0.47137	-1.08507	0.019445	0.955732
CCDC46	0.632313	-0.661289	0.0194762	0.955732
ARSA	0.662071	-0.594942	0.0194801	0.955732
STARD8	0.444383	-1.17013	0.0195191	0.955732
PLXDC2	0.326344	-1.61554	0.0195287	0.955732
ELP3	1.39773	0.483087	0.01961	0.955732
CDKN1A	0.505931	-0.982987	0.019611	0.955732
MTCH1	0.765608	-0.385323	0.0197779	0.955732
FOXD4	2.35947	1.23846	0.0197795	0.955732
TTLL9	1.86024	0.895488	0.0199	0.955732
BEGAIN	0.320734	-1.64055	0.0199171	0.955732
LUZP1	0.646004	-0.630385	0.0199621	0.955732
C12orf65	1.46094	0.546901	0.0200122	0.955732
CCDC103	2.07046	1.04995	0.0200993	0.955732
RPL24	1.56232	0.643688	0.0201669	0.955732
TGFB3	0.506171	-0.982303	0.0201978	0.955732
ZNF154	0.434595	-1.20226	0.0202133	0.955732
REEP1	0.239735	-2.06049	0.020227	0.955732
SERPINB2	0.103726	-3.26915	0.0204281	0.955732
POU4F3	0.716716	-0.480526	0.020446	0.955732
CCDC79	1.30801	0.387376	0.020563	0.955732
SETD7	0.48877	-1.03277	0.0205831	0.955732
RIPK1	0.743173	-0.42823	0.0205974	0.955732
PLCXD3	0.1712	-2.54625	0.020615	0.955732
WFIKKN1	3.02713	1.59795	0.0206351	0.955732
LAYN	0.263633	-1.9234	0.0206936	0.955732
GLUL	0.505884	-0.98312	0.0207616	0.955732
DST	0.474923	-1.07423	0.020776	0.955732
ACOT9	0.779949	-0.358549	0.0209535	0.955732
CLN6	1.45945	0.545426	0.0210971	0.955732
ZGLP1	2.25097	1.17055	0.0211056	0.955732
SNORA81	0.636861	-0.650949	0.0212228	0.955732
LOC100302640	0.439059	-1.18751	0.0212308	0.955732
ASTN1	0.451511	-1.14717	0.0212401	0.955732
SERPINA12	0.603828	-0.727789	0.0212503	0.955732
FOXL1	0.249031	-2.0056	0.0212633	0.955732
KIAA0090	0.656192	-0.60781	0.0212673	0.955732
RBM14	1.32115	0.40179	0.0212805	0.955732
IQSEC3	0.277161	-1.85121	0.0213464	0.955732
HNRNPC	1.22916	0.297672	0.0213472	0.955732
AARSD1	1.46596	0.55185	0.0213893	0.955732
POTEE	0.611203	-0.710277	0.0214135	0.955732
SYCE1	0.20536	-2.28377	0.0214343	0.955732
HRH1	0.363075	-1.46166	0.0215065	0.955732
ARNTL	0.526915	-0.924357	0.021541	0.955732
RNF185	0.826085	-0.275637	0.0215456	0.955732
LMNA	0.687012	-0.541593	0.0216195	0.955732
KIAA0895	1.8171	0.861639	0.0217251	0.955732
PRKG1	0.269682	-1.89067	0.0217925	0.955732
PLIN3	0.618653	-0.692798	0.0218715	0.955732
AAA1	1.98164	0.986697	0.0218827	0.955732
ZNF85	0.413058	-1.27558	0.0218941	0.955732
P2RY11	1.86128	0.896293	0.0219316	0.955732
SNHG5	2.48725	1.31455	0.021964	0.955732
FLJ42393	1.70086	0.766268	0.0220774	0.955732
NLRP7	3.16987	1.66442	0.0220862	0.955732
PTRH2	1.442	0.528073	0.0221318	0.955732
KPNA7	0.412931	-1.27603	0.0221646	0.955732
DOK5	0.365082	-1.45371	0.0222772	0.955732
PEAR1	0.499296	-1.00203	0.0223797	0.955732
PSME1	1.47785	0.563503	0.0225555	0.955732
COASY	1.44613	0.532201	0.0225606	0.955732
ARHGAP21	0.621061	-0.687194	0.0225692	0.955732
ZNF263	1.30899	0.388454	0.0226778	0.955732
SLC17A5	0.543952	-0.878448	0.0226802	0.955732
SPARC	0.439891	-1.18478	0.0227977	0.955732
KIAA0513	0.452208	-1.14494	0.0228226	0.955732
DSCR9	1.7483	0.805955	0.022874	0.955732
C17orf82	2.09198	1.06487	0.023106	0.955732
ARL1	1.30825	0.387642	0.0232177	0.955732
LOC100216001	0.21156	-2.24086	0.0232387	0.955732
COL20A1	1.58501	0.66449	0.0232934	0.955732
C12orf47	1.54497	0.627578	0.0234184	0.955732
HIST4H4	2.60396	1.38071	0.0234413	0.955732
OSCAR	0.563263	-0.828118	0.02345	0.955732
FSTL1	0.385404	-1.37556	0.023559	0.955732
RBPMS2	0.393118	-1.34696	0.0235957	0.955732
ZNHIT3	1.25871	0.33195	0.0236593	0.955732
SEC22C	0.666237	-0.585893	0.0239115	0.955732
CDCP1	0.408124	-1.29292	0.0239762	0.955732
MRPS33	1.46847	0.554311	0.024019	0.955732
PNLDC1	0.434686	-1.20195	0.0242328	0.955732
FKBP9L	0.415652	-1.26655	0.0242455	0.955732
ACR	0.584622	-0.774424	0.0243005	0.955732
HEXDC	1.58472	0.664232	0.0246076	0.955732
ZNF727	0.346976	-1.52709	0.0246386	0.955732
CCDC87	1.94927	0.962933	0.0246487	0.955732
RPS2	1.71414	0.777487	0.0246733	0.955732
C15orf59	0.33036	-1.59789	0.0246841	0.955732
OSBPL6	0.276217	-1.85613	0.0247111	0.955732
SPRR2A	0.3242	-1.62504	0.0247905	0.955732
RAB3D	1.42684	0.512822	0.0248479	0.955732
CDAN1	1.40842	0.494082	0.0249786	0.955732
FAM131A	0.67086	-0.575916	0.0250166	0.955732
C21orf45	1.65571	0.727453	0.0250321	0.955732
METT11D1	1.34558	0.428233	0.0251669	0.955732
C14orf181	1.71255	0.776147	0.0252189	0.955732
CBX3	1.31343	0.393337	0.0252203	0.955732
DRAM1	2.45528	1.29589	0.0252413	0.955732
MOSC1	2.10114	1.07117	0.0252931	0.955732
FEZ2	0.637297	-0.649963	0.0253793	0.955732
TRAM2	0.569633	-0.811896	0.0255847	0.955732
DNM1	2.95715	1.56421	0.0256203	0.955732
PRR22	2.19741	1.1358	0.0256989	0.955732
SLC27A6	2.36266	1.24041	0.0257153	0.955732
KIAA0319	3.11605	1.63972	0.0257841	0.955732
RRBP1	0.760177	-0.395592	0.0258851	0.955732
RNF8	0.722111	-0.469708	0.0259697	0.955732
ZNF423	0.462822	-1.11147	0.0260397	0.955732
TGFBR2	0.603983	-0.727419	0.0260517	0.955732
EPHA8	0.527228	-0.923501	0.0261582	0.955732
AGBL5	1.45793	0.54392	0.0262784	0.955732
KCNJ12	0.345833	-1.53185	0.0262926	0.955732
BCAT1	0.315318	-1.66512	0.0263066	0.955732
C19orf26	0.390094	-1.35811	0.0263657	0.955732
B4GALNT3	0.24888	-2.00648	0.0263889	0.955732
MRPL45	1.62741	0.702579	0.0263892	0.955732
SNORD115-26	1.322	0.402723	0.0264368	0.955732
TCAP	2.28039	1.18928	0.0264401	0.955732
C2orf39	3.62534	1.85812	0.0265083	0.955732
PSAP	0.720733	-0.472464	0.0265102	0.955732
PTH2R	7.74169	2.95265	0.0265256	0.955732
KLHL18	0.703949	-0.506457	0.0265558	0.955732
RAD9B	1.56075	0.642242	0.0266671	0.955732
EMP1	0.350457	-1.51269	0.0267017	0.955732
LOC728392	0.509708	-0.972256	0.0267262	0.955732
PLAT	0.283871	-1.81669	0.0269227	0.955732
DHRS9	0.142342	-2.81256	0.0269432	0.955732
SEPT7L	0.741491	-0.4315	0.0270829	0.955732
PJA1	0.505854	-0.983206	0.0271074	0.955732
TAL2	3.14096	1.65121	0.0271432	0.955732
MRPS35	1.25082	0.322871	0.0271637	0.955732
RPL19P12	1.58116	0.66098	0.0273054	0.955732
DNAJC2	1.36524	0.449157	0.0273276	0.955732
C2orf77	1.89285	0.920558	0.027362	0.955732
CAPN7	0.656667	-0.606767	0.0274055	0.955732
SFRP1	0.261085	-1.93741	0.0275184	0.955732
LOC642826	1.69968	0.765264	0.0275337	0.955732
TTTY4C	2.55457	1.35308	0.0275949	0.955732
D2HGDH	1.64336	0.716648	0.0276019	0.955732
PAN2	1.31217	0.39196	0.0276843	0.955732
WDR16	1.42737	0.513364	0.0276949	0.955732
BTN2A1	0.671937	-0.573602	0.0277312	0.955732
TUB	0.300689	-1.73366	0.0277348	0.955732
C3orf43	1.34385	0.426374	0.0277417	0.955732
EXOSC5	1.62955	0.704476	0.0277811	0.955732
HSPD1	1.55119	0.633378	0.0278687	0.955732
POLE	1.54676	0.629246	0.0279885	0.955732
THSD7A	0.400393	-1.32051	0.0280094	0.955732
PPCDC	1.54969	0.631984	0.0280359	0.955732
NCRNA00174	1.62321	0.698846	0.0280494	0.955732
KAT2A	1.62672	0.701963	0.0280675	0.955732
MLF1	3.28377	1.71535	0.0281282	0.955732
PRDM15	1.30745	0.386761	0.0281627	0.955732
TMEM111	0.731281	-0.451501	0.028283	0.955732
HTRA1	0.569752	-0.811594	0.0284051	0.955732
HYAL3	1.68127	0.749554	0.02842	0.955732
ZDHHC11	2.76575	1.46767	0.0284238	0.955732
FAM186A	2.30459	1.20451	0.0284557	0.955732
RAB3IP	1.70614	0.770739	0.0284723	0.955732
NMRAL1	1.46007	0.546039	0.0284739	0.955732
MTERFD3	1.60285	0.680638	0.028487	0.955732
ACER1	1.21675	0.283036	0.0284996	0.955732
PDCD6	1.69195	0.758689	0.0284999	0.955732
SLIT2	0.225778	-2.14702	0.0285158	0.955732
AGAP5	1.77758	0.829916	0.0285254	0.955732
MYL5	1.89034	0.918644	0.0285694	0.955732
THUMPD3	0.805284	-0.31243	0.0285829	0.955732
CSPG5	0.36207	-1.46566	0.0286801	0.955732
ANKS3	1.53213	0.615541	0.0287162	0.955732
OR10A3	0.859061	-0.219167	0.028897	0.955732
LOC100272146	1.67058	0.740346	0.0289058	0.955732
NPTXR	0.413562	-1.27382	0.0289632	0.955732
GRIK3	0.228974	-2.12674	0.029065	0.955732
HSF4	1.96516	0.974644	0.0290882	0.955732
[truncated: 415 more rows]

## Sheet: COAD
Table2. Differential expression genes related CDKN2A in TCGA-COAD
[truncated: 6,941 more rows]

[truncated: 27 more sheets: DLBC, ESCA, GBM, HNSC, KICH, KIRC, KIRP, LAML, LGG, LIHC, LUAD, LUSC, MESO, OV, PAAD, PCPG, PRAD, READ, SARC, SKCM …]
