# Supplementary material for: The cell senescence regulator p16 is a promising cancer prognostic and immune check-point inhibitor (ICI) therapy biomarker
Source: Aging (Albany NY). 2023 Mar 23;15(6):2136–57. doi: 10.18632/aging.204601 (PMC10085592; doi:10.18632/aging.204601)
Supplement: Supplementary Table 3 [file aging-15-204601-s004.xlsx]

## Sheet: ACC
Table 3. CDKN2A related components in ACC
rank	cmap name	mean	n	enrichment	p	specificity	percent non-null
1	phenoxybenzamine	-0.78	4	-0.984	0	0	100
2	resveratrol	-0.779	9	-0.915	0	0	100
3	15-delta prostaglandin J2	-0.375	15	-0.667	0	0.0226	53
4	fluphenazine	-0.471	18	-0.653	0	0	72
5	trichostatin A	-0.289	182	-0.312	0	0.5248	50
6	gossypol	-0.376	6	-0.797	0.00016	0	50
7	thioridazine	-0.418	20	-0.465	0.00022	0.1828	65
8	0175029-0000	-0.617	6	-0.771	0.00026	0.0352	83
9	0297417-0002B	-0.753	3	-0.944	0.00028	0.0164	100
10	MG-262	-0.743	3	-0.944	0.00028	0.0315	100
11	rottlerin	-0.695	3	-0.941	0.00032	0.0168	100
12	vorinostat	-0.452	12	-0.571	0.00034	0.2832	66
13	astemizole	-0.714	5	-0.825	0.00042	0.0396	100
14	nortriptyline	-0.652	4	-0.878	0.00052	0.0073	100
15	withaferin A	-0.64	4	-0.877	0.00052	0.0492	100
16	pyrvinium	-0.644	6	-0.746	0.00052	0.0516	83
17	butoconazole	-0.685	4	-0.865	0.00062	0.0076	100
18	0173570-0000	-0.584	6	-0.738	0.00068	0.0219	83
19	nifedipine	-0.507	7	-0.64	0.00236	0.0063	71
20	esculetin	-0.653	3	-0.886	0.00288	0	100
21	etoposide	-0.476	4	-0.802	0.00296	0.0256	75
22	scriptaid	-0.649	3	-0.884	0.00302	0.0625	100
23	puromycin	-0.557	4	-0.798	0.00324	0.0448	75
24	5707885	-0.439	4	-0.796	0.00338	0.0084	75
25	parthenolide	-0.482	4	-0.796	0.0034	0.0552	75
26	MS-275	-0.708	2	-0.955	0.00427	0.1235	100
27	megestrol	-0.393	4	-0.784	0.00438	0	75
28	clotrimazole	-0.536	5	-0.708	0.00457	0.0303	80
29	prochlorperazine	-0.365	16	-0.419	0.00467	0.1132	56
30	PNU-0251126	-0.282	6	-0.646	0.00552	0.0267	50
31	trifluoperazine	-0.351	16	-0.413	0.00558	0.2115	50
32	lomustine	-0.336	4	-0.771	0.00561	0.0493	50
33	nordihydroguaiaretic acid	-0.327	15	-0.421	0.00625	0.0079	53
34	PNU-0230031	-0.274	8	-0.56	0.0066	0.0208	50
35	pizotifen	-0.392	4	-0.756	0.00722	0.0086	75
36	5248896	-0.72	2	-0.941	0.00734	0.0132	100
37	desipramine	-0.48	4	-0.75	0.00776	0.0246	75
38	suramin sodium	0.523	4	0.737	0.00929	0.0069	75
39	methotrexate	-0.354	8	-0.545	0.00941	0.0616	50
40	naftifine	-0.358	4	-0.736	0.00973	0.0065	50
41	valinomycin	-0.261	4	-0.735	0.00985	0.0571	50
42	GW-8510	-0.562	4	-0.725	0.01166	0.2977	75
43	thiostrepton	-0.605	4	-0.708	0.01514	0.0556	75
44	abamectin	-0.571	4	-0.704	0.01576	0.0309	75
45	PHA-00767505E	0.48	4	0.701	0.01651	0.0065	75
46	ursolic acid	-0.313	4	-0.699	0.01733	0.0365	50
47	pyrimethamine	-0.377	5	-0.631	0.01762	0.0533	60
48	etacrynic acid	-0.468	3	-0.794	0.01785	0.006	66
49	mefloquine	-0.557	5	-0.628	0.01846	0.1482	80
50	amantadine	0.528	4	0.689	0.01965	0.0755	75
51	0179445-0000	-0.351	8	-0.507	0.01982	0.0405	50
52	flutamide	-0.462	5	-0.623	0.02001	0.0195	80
53	methylbenzethonium chloride	-0.36	6	-0.574	0.02114	0.0579	66
54	benzamil	-0.298	6	-0.572	0.02221	0.0323	50
55	deptropine	-0.522	4	-0.681	0.0225	0.0299	75
56	chlorcyclizine	-0.289	6	-0.57	0.02294	0.0089	50
57	zardaverine	0.336	4	0.677	0.02387	0.0507	50
58	rilmenidine	-0.293	4	-0.672	0.02598	0.0343	50
59	benzethonium chloride	-0.488	3	-0.765	0.02656	0.041	66
60	niclosamide	-0.37	5	-0.599	0.02958	0.1157	60
61	bepridil	-0.537	4	-0.657	0.03191	0.0909	75
62	acacetin	-0.429	6	-0.55	0.03212	0.105	66
63	amodiaquine	-0.469	4	-0.649	0.03567	0.0329	75
64	daunorubicin	-0.496	4	-0.648	0.03638	0.1754	75
65	spaglumic acid	0.376	2	0.867	0.0364	0.0635	50
66	clioquinol	-0.448	5	-0.574	0.04232	0.0496	60
67	antazoline	-0.403	4	-0.636	0.04269	0.0629	75
68	bethanechol	0.365	4	0.636	0.04313	0.0288	50
69	bumetanide	0.323	4	0.634	0.0445	0.2012	50
70	mycophenolic acid	-0.421	3	-0.718	0.04609	0.1327	66
71	fluspirilene	-0.484	4	-0.627	0.0476	0.1239	75

## Sheet: BLCA
Table 3. CDKN2A related components in BLCA
rank	cmap name	mean	n	enrichment	p	specificity	percent non-null
1	tomatidine	0.384	4	0.886	0.00016	0	50
2	hydrocortisone	0.386	3	0.944	0.00022	0	66
3	ondansetron	-0.263	4	-0.832	0.00145	0	50
4	carteolol	-0.188	4	-0.78	0.00487	0.0118	50
5	CP-863187	-0.32	4	-0.69	0.01987	0.0471	50
6	isotretinoin	-0.338	4	-0.69	0.01995	0.0159	50
7	spectinomycin	0.304	4	0.677	0.02357	0.0069	50
8	ciclopirox	-0.253	4	-0.657	0.03185	0.1238	50
9	metixene	-0.278	4	-0.656	0.03235	0.0615	50
											Table 3. CDKN2A related components in ACC

## Sheet: BRCA
Table 3. CDKN2A related components in BRCA
rank	cmap name	mean	n	enrichment	p	specificity	percent non-null
1	camptothecin	0.852	3	0.992	2e-05	0.0893	100
2	irinotecan	0.875	3	0.985	4e-05	0.0818	100
3	wortmannin	-0.439	18	-0.454	0.0007	0.1592	55
4	monensin	-0.387	6	-0.706	0.00157	0.065	50
5	0317956-0000	-0.476	8	-0.619	0.00177	0.0339	75
6	pipenzolate bromide	0.444	4	0.809	0.00247	0.0073	75
7	5182598	0.756	2	0.96	0.00266	0.0261	100
8	diprophylline	-0.358	5	-0.727	0.0032	0	60
9	eucatropine	0.315	6	0.674	0.00328	0.0167	50
10	phthalylsulfathiazole	0.455	5	0.73	0.00336	0.0266	60
11	captopril	-0.582	5	-0.717	0.00391	0.0053	80
12	arachidonic acid	0.438	3	0.87	0.00407	0	100
13	mitoxantrone	0.443	3	0.868	0.00427	0.0351	66
14	cinchonine	-0.529	4	-0.76	0.00676	0.0741	75
15	Prestwick-1103	-0.285	4	-0.76	0.00682	0.0397	50
16	furazolidone	-0.306	4	-0.756	0.00718	0.0191	50
17	quinpirole	-0.309	4	-0.755	0.00728	0.0148	50
18	phenoxybenzamine	0.717	4	0.747	0.00782	0.3069	75
19	verteporfin	0.639	3	0.841	0.00787	0.0714	66
20	perphenazine	-0.482	5	-0.678	0.00811	0.0509	80
21	CP-320650-01	-0.381	8	-0.546	0.00915	0.1151	50
22	fluocinonide	0.373	5	0.669	0.01047	0.0224	60
23	daunorubicin	0.582	4	0.726	0.01132	0.1162	75
24	etifenin	0.434	4	0.725	0.01144	0.0073	75
25	digitoxigenin	0.244	4	0.719	0.01253	0.1381	50
26	levomepromazine	-0.335	4	-0.715	0.01337	0.028	50
27	chenodeoxycholic acid	-0.319	4	-0.714	0.01343	0.0923	50
28	doxorubicin	0.455	3	0.812	0.01352	0.1062	66
29	sulmazole	-0.517	3	-0.81	0.01352	0.0396	66
30	sodium phenylbutyrate	-0.266	7	-0.558	0.01359	0.0392	57
31	alcuronium chloride	0.55	2	0.914	0.01481	0.0074	100
32	oxybenzone	-0.278	4	-0.703	0.01605	0.0352	50
33	aciclovir	-0.202	6	-0.583	0.01824	0.0993	50
34	timolol	-0.402	4	-0.688	0.02043	0.1119	50
35	diethylstilbestrol	-0.295	6	-0.571	0.02253	0.082	50
36	esculetin	-0.361	3	-0.772	0.02442	0.0128	66
37	metixene	-0.51	4	-0.674	0.02532	0.0615	75
38	tetrandrine	-0.505	4	-0.669	0.02723	0.0741	75
39	iopromide	-0.367	4	-0.667	0.02755	0.0809	50
40	dihydroergocristine	-0.406	4	-0.667	0.02765	0.0461	50
41	zoxazolamine	0.453	4	0.665	0.02861	0.0175	75
42	lovastatin	-0.553	4	-0.664	0.02873	0.0388	75
43	yohimbic acid	-0.439	3	-0.757	0.02948	0.0706	66
44	exisulind	-0.546	2	-0.874	0.03155	0.0287	100
45	deferoxamine	0.25	8	0.473	0.03578	0.0805	50
46	sanguinarine	0.47	2	0.866	0.0366	0.1579	50
47	Trolox C	-0.492	4	-0.641	0.03975	0.0265	75
48	doxazosin	0.361	4	0.637	0.04245	0.1282	50
49	gentamicin	-0.333	4	-0.628	0.04733	0.1974	50
50	ambroxol	-0.348	4	-0.627	0.04748	0.1384	50
51	15(S)-15-methylprostaglandin E2	0.357	4	0.628	0.04808	0.1469	75
52	pyrvinium	0.311	6	0.521	0.04815	0.4326	50
53	amoxicillin	0.319	4	0.625	0.04955	0.0455	50

## Sheet: CESC
Table 3. CDKN2A related components in CESC
rank	cmap name	mean	n	enrichment	p	specificity	percent non-null
1	5182598	0.941	2	0.998	2e-05	0	100
2	irinotecan	0.597	3	0.945	0.00022	0.1227	66
3	levobunolol	-0.308	4	-0.855	0.0008	0.0064	50
4	etoposide	0.463	4	0.822	0.00167	0.0769	75
5	ketoconazole	0.297	4	0.638	0.04205	0.0397	50
6	5224221	0.42	2	0.854	0.04326	0.3184	50
7	esculetin	-0.539	3	-0.711	0.04919	0.0513	66

## Sheet: CHOL
Table 3. CDKN2A related components in CHOL
rank	cmap name	mean	n	enrichment	p	specificity	percent non-null
1	ciclopirox	-0.576	4	-0.761	0.00664	0.0476	75
2	cefapirin	0.625	4	0.744	0.00816	0.0077	75
3	econazole	-0.62	4	-0.735	0.00985	0.0855	75
4	famotidine	-0.457	5	-0.57	0.04408	0.0225	60

## Sheet: COAD
Table 3. CDKN2A related components in COAD
rank	cmap name	mean	n	enrichment	p	specificity	percent non-null
1	luteolin	0.811	4	0.97	0	0	100
2	irinotecan	0.87	3	0.983	4e-05	0.0818	100
3	promethazine	0.3	4	0.805	0.00269	0.0069	50
4	propylthiouracil	0.337	4	0.799	0.00312	0.025	50
5	cinchonine	-0.516	4	-0.799	0.00322	0.0556	75
6	CP-320650-01	-0.354	8	-0.582	0.00407	0.0791	50
7	trimetazidine	0.301	4	0.783	0.00416	0	50
8	colistin	-0.438	4	-0.786	0.00424	0.0231	75
9	dioxybenzone	0.275	4	0.778	0.0046	0.0079	50
10	0175029-0000	0.51	6	0.658	0.00471	0.1941	66
11	ambroxol	-0.295	4	-0.772	0.00547	0.0315	50
12	yohimbic acid	-0.679	3	-0.859	0.00561	0.0059	100
13	Prestwick-642	-0.466	4	-0.77	0.00571	0.0276	75
14	Prestwick-691	-0.417	3	-0.856	0.00595	0.0592	66
15	alsterpaullone	0.505	3	0.854	0.00599	0.1279	66
16	mitoxantrone	0.454	3	0.853	0.00601	0.0468	66
17	camptothecin	0.614	3	0.848	0.00663	0.2232	66
18	3-acetylcoumarin	0.325	5	0.689	0.00721	0.016	60
19	sodium phenylbutyrate	-0.283	7	-0.587	0.00826	0.0196	57
20	nifedipine	0.484	7	0.583	0.00834	0.0132	71
21	sulmazole	-0.392	3	-0.837	0.00863	0.0283	66
22	bepridil	0.323	4	0.74	0.00875	0.0889	50
23	finasteride	-0.343	6	-0.622	0.0094	0.1707	50
24	proscillaridin	0.446	3	0.832	0.00951	0.0842	66
25	tobramycin	0.319	4	0.735	0.00971	0.0373	50
26	trihexyphenidyl	-0.475	3	-0.823	0.0112	0.0301	66
27	chenodeoxycholic acid	-0.337	4	-0.72	0.01251	0.0923	50
28	daunorubicin	0.604	4	0.719	0.01263	0.1263	75
29	carteolol	-0.178	4	-0.712	0.01402	0.0237	50
30	vigabatrin	-0.432	3	-0.808	0.01418	0.0211	66
31	spaglumic acid	0.68	2	0.915	0.01433	0.0238	100
32	digoxin	0.462	4	0.709	0.01458	0.1402	75
33	phenoxybenzamine	0.592	4	0.688	0.01975	0.3861	75
34	pioglitazone	0.319	11	0.434	0.02123	0.1769	54
35	napelline	0.268	4	0.679	0.02318	0.0148	50
36	remoxipride	0.326	4	0.671	0.02586	0.0602	50
37	eldeline	0.302	6	0.56	0.02702	0.0857	50
38	Trolox C	-0.448	4	-0.669	0.02723	0.0159	75
39	bezafibrate	0.259	4	0.667	0.02751	0.0455	50
40	tetrandrine	-0.497	4	-0.667	0.02775	0.0741	75
41	scoulerine	0.379	4	0.663	0.0292	0.0259	75
42	5194442	0.461	4	0.661	0.03	0.0645	75
43	parthenolide	0.495	4	0.66	0.0304	0.2994	75
44	6-azathymine	0.367	4	0.656	0.03256	0.0435	50
45	spiperone	0.585	2	0.873	0.03272	0.096	100
46	chrysin	0.574	3	0.741	0.03407	0.1404	66
47	tridihexethyl	0.474	4	0.651	0.03499	0.0175	75
48	TTNPB	-0.458	2	-0.867	0.03501	0.0464	100
49	karakoline	-0.306	6	-0.542	0.03669	0.04	50
50	NU-1025	0.444	2	0.865	0.03684	0.0476	100
51	enilconazole	0.471	4	0.642	0.0403	0.0199	75
52	sanguinarine	0.469	2	0.857	0.04143	0.1711	50
53	chlorhexidine	-0.335	5	-0.573	0.04246	0.0602	60
54	CP-690334-01	-0.324	8	-0.463	0.04423	0.1769	50
55	pridinol	0.292	4	0.631	0.04595	0.04	50
56	pyrimethamine	-0.307	5	-0.563	0.04874	0.1	60
57	megestrol	0.414	4	0.624	0.04991	0.0909	75

## Sheet: DLBC
Table 3. CDKN2A related components in DLBC
rank	cmap name	mean	n	enrichment	p	specificity	percent non-null
1	irinotecan	0.865	3	0.988	2e-05	0.0818	100
2	cinchonine	-0.463	4	-0.87	0.00058	0.0062	75
3	clorsulon	-0.323	4	-0.811	0.00251	0.0142	50
4	chlorhexidine	-0.468	5	-0.726	0.0033	0.015	80
5	hydrocortisone	0.374	3	0.876	0.00359	0	66
6	azacitidine	0.508	3	0.873	0.00373	0.0721	66
7	propofol	0.325	4	0.785	0.0041	0.0068	50
8	yohimbic acid	-0.386	3	-0.847	0.00707	0.0059	66
9	NU-1025	0.457	2	0.923	0.01153	0.0159	100
10	Trolox C	-0.451	4	-0.694	0.01852	0.0159	75
11	hycanthone	0.441	4	0.677	0.02367	0.1658	75
12	mifepristone	-0.298	4	-0.637	0.04156	0.0253	50
13	scopolamine	0.331	4	0.63	0.04677	0.0303	50
14	suloctidil	0.402	4	0.624	0.04983	0.3182	50

## Sheet: ESCA
Table 3. CDKN2A related components in ESCA
rank	cmap name	mean	n	enrichment	p	specificity	percent non-null
1	5155877	-0.34	4	-0.754	0.00734	0.0066	50
2	ciclopirox	-0.531	4	-0.727	0.01134	0.0571	75
3	withaferin A	-0.454	4	-0.717	0.01303	0.1312	75
4	dydrogesterone	0.357	4	0.698	0.01725	0.013	50
5	quipazine	-0.325	4	-0.676	0.02455	0.0126	50
6	amiprilose	-0.328	4	-0.644	0.03847	0.0294	50

## Sheet: GBM
Table 3. CDKN2A related components in GBM
rank	cmap name	mean	n	enrichment	p	specificity	percent non-null
1	diprophylline	-0.419	5	-0.735	0.00274	0	60
2	eticlopride	-0.309	4	-0.801	0.00308	0	50
3	ciclopirox	-0.491	4	-0.719	0.01263	0.0667	75
4	dobutamine	-0.543	4	-0.712	0.01393	0.0073	75
5	antazoline	-0.547	4	-0.707	0.01522	0.0126	75

## Sheet: HNSC
Table 3. CDKN2A related components in HNSC
rank	cmap name	mean	n	enrichment	p	specificity	percent non-null
1	carteolol	-0.231	4	-0.852	0.00092	0	50
2	diprophylline	-0.382	5	-0.739	0.00246	0	60
3	anisomycin	-0.394	4	-0.808	0.00265	0.0593	50
4	lycorine	-0.42	5	-0.675	0.00843	0.18	60
5	fenofibrate	-0.506	3	-0.808	0.01416	0.0452	66
6	Trolox C	0.369	4	0.684	0.02154	0.0081	50
7	lovastatin	-0.351	4	-0.67	0.02668	0.0388	50
8	pinacidil	0.321	4	0.663	0.02926	0.0076	50
9	pizotifen	-0.297	4	-0.642	0.03929	0.0431	50
10	ciclopirox	-0.345	4	-0.634	0.04368	0.1714	50
11	chloropyramine	-0.293	4	-0.63	0.04603	0.079	50

[truncated: 23 more sheets: KICH, KIRC, KIRP, LAML, LGG, LIHC, LUAD, LUSC, MESO, OV, PAAD, PCPG, PRAD, READ, SARC, SKCM, STAD, TGCT, THCA, THYM …]
